# Supplementary material
Source: publisher figshare collection journal article supplement (https://acs.figshare.com/ndownloader/files/15534257)
Supplement: Supplementary file 1 [file 15534257]

## Sheet: Platelets Features Annotated
Table S7: Features found in human platelets. Lipid extracts of human platelets subjected to four different treatments were analysed using LC/IM-MS and processed using the MassHunter Suite and KniMet (missing value inputation performed with the KNN method). Features (mass-to-charge ration, retention time, drift time, and DTCCSN2) were annotated using an internal database as well as LIPID MAPS.
met_ID	mz	rt	DT	CCS	Annotation Lipid Maps	Internal DB	Donor 1 aspirin 1	Donor 1 aspirin 2	Donor 1 aspirin 3	Donor 1 untreated 1	Donor 1 untreated 2	Donor 1 untreated3	Donor 1 ethanol 1	Donor 1 ethanol 2	Donor 1 ethanol 3	Donor 1 thrombin 1	Donor 1 thrombin 2	Donor 1 thrombin 3	Donor 2 aspirin 1	Donor 2 aspirin 2	Donor 2 aspirin 3	Donor 2 untreated 1	Donor 2 untreated 2	Donor 2 untreated 3	Donor 2 ethanol 1	Donor 2 ethanol 2	Donor 2 ethanol 3	Donor 2 thrombin 1	Donor 2 thrombin 2	Donor 2 thrombin 3	Donor 3 aspirin 1	Donor 3 aspirin 2	Donor 3 aspirin 3	Donor 3 untreated 1	Donor 3 untreated 2	Donor 3 untreated 3	Donor 3 ethanol 1	Donor 3 ethanol 2	Donor 3 ethanol 3	Donor 3 thrombin 1	Donor 3 thrombin 2	Donor 3 thrombin 3
met_837	497.171	0.501	31.708	248.63	Unknown	Unknown	98232.2	86847.9	30828.9	129276	56232.5	53400.1	63992.8	58889.3	111724	51075.3	79408.6	95353.5	107883	70680	63867	98124.7	70423	81880.6	51618.5	79257.6	36507.3	67002.4	56941.2	97011.4	55682.5	95005.7	31636.5	49331.5	19962.6	13835.9	91685	93399.6	72872.2	4947.28	18315.1	15215.5
met_1781	259.073	0.504	19.124	152.72	Unknown	Unknown	23735.9	30035.2	21448.7	25819.4	20528.7	18777.9	25529.9	16813.3	27185.8	29319.4	22305.1	25308.1	29118.5	30416.6	14935.2	25922.7	24260.6	34868.7	16689.4	21606.4	11600.5	25025.9	25001.5	36896.4	21695.8	29445.3	17450	26967.4	23778.6	32514.8	26895.6	25982	24556.5	22474.3	10688.8	17687
met_3213	882.266	0.505	33.792	262.01	Unknown	Unknown	13355.3	9977.5	3747.4	2948.95	8472.36	9127.48	13151.2	5101.48	8294.62	9100.33	10804.5	11324.3	24775.7	24779.5	24539.5	24679.3	23484.7	23296	23055.6	26053.7	15839.8	30336.8	26087.1	21086.2	13592.9	8239.29	13979	8535.77	12575.8	13780.1	11850.7	19861.2	15847.2	9849.43	8285.28	15229.6
met_4141	319.094	0.505	33.132	263.76	Unknown	Unknown	18391.4	12479	13360.1	10411.2	11947.6	13096.4	10369.5	19051.8	14016.1	15142.9	10486.2	17522.9	27271.9	24169.5	11547.4	10552.2	4786.36	17486.4	17726.8	12842.8	70325.1	7666.1	14288.8	6559.66	10965.6	23090.5	15098.6	11084.2	13549.2	13132.5	16073.7	15963.5	14106.3	36876.6	25450.4	16282.7
met_4231	319.094	0.505	32.384	257.74	Unknown	Unknown	9615.95	10941.4	4298.05	10737.3	15924	25601.9	11449.9	10409	9595.12	8212.87	5986.5	4381.61	10678	17789.9	10121.6	33966.8	16863.2	12919.9	30984.1	14048.7	13234.1	12519.7	11006.7	15035	7096.87	15151.3	8754.74	6287.27	11640.2	11546.5	8612.67	7523.11	11911.3	18478	12356.9	9927.06
met_586	352.009	0.505	21.371	168.7	Unknown	Unknown	69843	113158	57905.8	181666	60389.5	43557	126966	82874.1	162369	54839.7	76259.2	105995	118213	97680.4	75763.3	89358.6	75767	150311	39536.8	66602.2	23042.4	108136	61929.4	128613	67879	118336	41029.9	198595	95963.9	22318.6	210208	85765.5	72884.6	68748	17896	32416.7
met_4818	281.045	0.506	19.232	153	Unknown	Unknown	11387.1	15635.3	8554.14	11041.8	8989.56	3883.38	10717.5	2843.95	16260.9	11236.2	5622.93	8527.88	8742.45	10280.3	4511.45	10989.9	2317.78	9074.86	8287.87	7711.74	8715.64	3842.08	5205.83	13340	7228.28	20864.6	2426.92	17640.2	8582.14	5129.06	14839.4	5233.76	5597.63	9336.59	7017.09	6263.77
met_919	412.031	0.507	22.271	174.95	Unknown	Unknown	43203.5	68408.3	15542.5	145008	33018.8	24845.1	112205	51401.9	97952	34888	44952.2	70598	69115	60044.8	43528.5	56669.8	37977.6	91942.8	26259.8	41548.8	35813.4	56274.5	31784.6	69385.1	31372.8	59717.1	24237.5	160915	37490.4	16695.1	136983	53206.6	41427.2	38158.1	10682.2	22818.2
met_2656	904.248	0.508	34.12	264.48	Unknown	Unknown	12241.3	4860.16	10094.7	8334.38	9869.98	8459.27	12936.2	9075.54	9945.49	10517.7	12401.3	11604.5	26356.2	33219.1	28880.6	36156.4	30878.7	28214.6	18127.3	33949.3	23563.3	31359.2	28534.1	24557.4	17485.1	14766.9	16061.9	10629.9	13301.8	16361.2	15612.3	24384.7	21128.5	13237	14438.1	17842.4
met_4947	323.055	0.508	21.036	166.57	Unknown	Unknown	8303.46	11892.7	9567.74	14859.5	14329.5	4864.38	8941.81	7135.27	17097	7532.11	6378.33	5993.16	9477.61	9547.36	5436.27	9328.34	9358.26	12370.1	11031.3	11105.8	9387.17	9088.2	8782.32	8003.8	11560.7	16473.9	11725	24086	13628.4	7251.39	10817.3	4383.18	9971.81	12141.9	12168.2	10800.1
met_1772	644.167	0.51	28.661	223.17	Unknown	Unknown	9331.18	13119.2	9914.5	10211.7	14840.9	10207.6	11581.7	13258.1	14305.6	13751.9	13028.2	16490.1	36900.7	37629.9	43481	46255.9	41047.1	42509.9	39184.6	36900.3	32653	45403.6	44529.5	41021	24617.2	26631.2	21834.3	17380.6	5770.76	25945.1	20028.5	32352.7	27524	2390.48	19964.9	24597.1
met_4612	235.075	0.511	19.219	154.25	Unknown	Unknown	9692.13	16524.7	17202	3956.43	10377.3	12814	8301.1	7336.02	6935.02	8242.44	8535.04	734.351	13061	11523.3	19103.7	15577	13861.2	8348.1	9575.6	11332.4	3690.19	9435.74	5725.9	9745.19	16337.5	11591.6	15503.1	10066	10106	11689.7	5822.76	5902.71	9401.91	8532.84	3176.96	9099.95
met_507	384.087	0.511	22.73	179.01	Unknown	Unknown	46875.4	55754.6	48292.3	47776.9	50509.5	49727.1	58728.8	59932.4	73740.7	57977.1	59685.9	66537.5	153664	173865	162024	191013	164505	179972	164486	159498	116321	199366	159085	164207	119130	99337.4	102371	103538	28772.5	98094.7	97411.8	114656	113749	17296.1	88469.5	105300
met_3514	417.153	0.512	24.95	196.17	Unknown	Unknown	10288.8	14971	9836.35	10614.1	6617.04	13006.9	16100.8	11738.4	13216.2	11004.2	14975.2	17935.5	8023.05	10508.1	4135.86	13725.8	16344.6	14950.3	7807.26	9296.52	6375.8	14865.9	11150.5	13127.4	8170.18	5791.4	8557.29	18234.4	5112.46	12819.3	17538.9	17332.4	11637.1	10132.6	5664.19	9484.42
met_1418	497.171	0.514	29.362	230.08	Unknown	Unknown	29020.2	32567.3	38144.5	28790.1	28762.7	5990.86	33926.9	27158.3	43994.8	26498.8	26272.3	16105.5	41837.1	39417.3	18014.2	40840.9	18586.3	29584.8	35731	26006.6	32266.5	35854.7	36318.6	51655.4	18959.8	21676.8	40135.3	17605.6	46778.9	38549.8	33222.1	27446.8	26548.4	27487.7	42605.6	35871.3
met_2166	726.17	0.514	30.413	236.38	Unknown	Unknown	8935.14	11438.7	10793.8	4601.41	13191.1	14755.5	10220.8	11498.7	11806.9	12562.5	15109.6	13960.1	25280.5	29280.1	30175.8	38495.6	36563	30538.8	2707.68	35834.6	29962.8	32728.4	34321.2	31137	18172	21840	12228.3	11345.7	8471.52	25607.2	11296.2	26989.6	22645.5	13023.9	23084.6	23900.6
met_3171	799.262	0.515	33.019	256.39	Unknown	Unknown	71624.2	74876.4	52620.6	78654.1	89297.1	97656.1	110198	117850	115293	122429	114960	114850	22054.5	25961.1	37572	102079	100445	97240.8	141025	142363	142498	143568	112104	140749	58106.1	62640.4	56046.1	79863.6	103446	106961	145414	156024	144376	157032	145810	154750
met_3587	808.173	0.515	32.058	248.81	Unknown	Unknown	12414.9	10635.9	13194.3	12542.9	8451.99	8037.92	13299.4	10389.9	7085.46	7545.6	9737.78	9808.63	14962.2	15328.7	7887.56	24602.7	26760.3	18624.1	18601.9	17472.2	20693.6	18537.7	20182.3	14890.5	13048.6	12803.3	14103.4	13836.8	6765.46	16215.3	12666.6	15497.1	19247.5	14252.3	16786.9	9946.23
met_8254	237.091	0.515	31.232	251.92	Unknown	Unknown	6032.01	6882.45	5794.03	2047.47	5591.69	4571.22	5076.13	7193.04	5330.42	7669.96	5560.53	8629.86	5248.93	4451.16	4080.85	6012.15	3222.88	6071.44	6741.16	7251.03	6429.51	3124.98	5824.51	8200.22	6107.11	15262.2	3808.96	13164.4	6021.53	4579.59	6029.64	5808.85	5857.28	1270.52	5048.39	5393.8
met_2300	466.09	0.516	24.568	192.5	Unknown	Unknown	7756.08	9228.59	11805.2	6495.2	14035.6	9809.55	7825.72	10099.7	14255.1	4469.13	13050.4	12911.3	29640.4	26797.7	24735.9	36656.1	29089.8	27157.5	27970.1	23972.1	27735.8	28333.3	29522.1	30059.4	17832.8	17773.7	18355.3	16325.3	10975	26520.5	17247.1	20971.4	22646.5	11822.1	13349.9	18245
met_2623	497.171	0.516	32.366	253.85	Unknown	Unknown	20240.4	19596.8	23987.3	23178.1	23104.1	18487.2	39594.5	20016.7	36886.3	18795.5	37626.7	21810.1	27889.2	22785.3	23977.3	19024	3145.35	40716.8	27149.7	24119.6	26278.1	40879.8	1082.89	21601.3	22922.9	22719.7	29547.1	45229.7	14617.6	23069.7	32306.3	24908.8	31262.8	4534.46	30932.2	45177.4
met_3274	237.091	0.517	25.91	208.62	Unknown	Unknown	7040.36	13172.7	4072.43	20798.9	1964.5	5336.88	27152.8	15285	22099.9	6392.81	17165.8	14453.9	33633.4	27108.1	7491.27	6457.17	8280.94	6561.56	12730.1	13141.9	8251.86	25830.6	18477.2	35748.7	9367.72	24737.4	4331.27	13050.9	9841.62	9626.2	31152.2	11893.7	8159.59	8239.42	6342.88	9325.15
met_5696	517.199	0.517	28.877	226	Unknown	Unknown	25530	35692.2	22492.9	78654.1	89297.1	97656.1	110198	117850	115293	122429	114960	114850	9588.63	15227.2	16509.2	102079	100445	97240.8	141025	142363	142498	143568	112104	140749	26729.9	39474.2	27664.3	79863.6	103446	106961	145414	156024	144376	157032	145810	154750
met_608	539.182	0.517	27.407	214.18	Unknown	Unknown	441295	491508	379351	78654.1	89297.1	97656.1	110198	117850	115293	122429	114960	114850	144645	196857	269819	102079	100445	97240.8	141025	142363	142498	143568	112104	140749	422523	430626	399673	79863.6	103446	106961	145414	156024	144376	157032	145810	154750
met_1896	237.091	0.518	28.732	231.58	Unknown	Unknown	64792.3	93180.8	56344.2	7975.28	89297.1	97656.1	13736.1	117850	15047.6	122429	114960	114850	49092.4	35658.7	47838.7	102079	100445	20852.6	141025	142363	142498	143568	112104	140749	75761.2	127427	64368.3	22118.7	103446	106961	12407.8	156024	144376	157032	145810	154750
met_4054	384.087	0.519	24.514	193.24	Unknown	Unknown	5216.6	4397	2912.31	4371.35	6911.56	6529.77	5041.48	5274.97	6428.67	4125.47	7895.88	4922	13870.5	2760.47	16875.5	17142	17876	16624.7	11356.7	17232.2	11682.7	15627	13086.8	17415.6	11778	10933.1	7699.92	8533.53	5726.29	14263.7	7322.01	11354.8	13759.1	9554.96	7231.07	10418.5
met_92	279.102	0.52	21.685	172.84	6-hydroxy-7E,9E-Octadecadiene-11,13,15,17-tetraynoic acid, [M-H]1-	Unknown	2791108	3240279	2632992	78654.1	89297.1	97656.1	110198	117850	115293	122429	114960	114850	1452420	1553164	2018051	102079	100445	97240.8	141025	142363	142498	143568	112104	140749	2752977	3071693	2322557	79863.6	103446	106961	145414	156024	144376	157032	145810	154750
met_1001	281.098	0.521	19.101	151.94	Unknown	Unknown	10101.8	48351.4	34900.4	52655.7	31033.7	3409.55	100497	129736	103650	47541.7	76884.8	119004	86397.9	84110.5	34548.1	17841.2	6810.97	7451.7	37685.2	26526.6	45868.3	47101.6	62687.6	14067.1	92174.4	20049.2	33905.9	47817.3	82899	28626.2	50947.7	83719	60050.8	9633.19	39883	94506.7
met_1722	621.184	0.521	28.883	225.09	Unknown	Unknown	139184	134040	126444	78654.1	89297.1	97656.1	110198	117850	115293	122429	114960	114850	36194.3	45026.2	79320	102079	100445	97240.8	141025	142363	142498	143568	112104	140749	137413	125650	119900	79863.6	103446	106961	145414	156024	144376	157032	145810	154750
met_2162	548.093	0.521	26.498	206.92	Unknown	Unknown	8824.86	4460.06	9206.8	5280.92	16114.3	15253.7	10074.6	8730.11	15214.6	9436.33	12843.4	10142.5	27885.7	25850.6	27127.4	44706.4	45665.8	30811.9	32187.8	29463.3	27237.5	32784.5	31104.1	24367.8	21076.2	17621.9	25481.9	13764.9	15172.9	29703.6	11680.5	20656.9	21028.5	13401.4	23186.7	21649.2
met_3545	497.171	0.521	30.503	239.1	Unknown	Unknown	9905.83	9168.19	7608.07	13861.3	5707.01	9635.04	14555.3	5851.15	13864.3	12111.9	9736.24	11759	22569.6	11918.5	9721.37	11531.2	19975.3	10338.7	4947.6	4614.9	11485	18435.7	11538.5	45653.8	11338.1	14929.7	8897.69	15651.8	10409.4	12799.6	27262.5	21243.6	6499.11	7970.93	8955.33	15208.3
met_3325	279.101	0.523	22.584	180.09	6-hydroxy-7E,9E-Octadecadiene-11,13,15,17-tetraynoic acid, [M-H]1-	Unknown	75340.1	63609.7	65677.4	78654.1	89297.1	97656.1	110198	117850	115293	122429	114960	114850	19371.8	174561	38103.4	102079	100445	97240.8	141025	142363	142498	143568	112104	140749	43472.8	46907.7	68814.7	79863.6	103446	106961	145414	156024	144376	157032	145810	154750
met_1989	703.188	0.524	30.927	240.56	Unknown	Unknown	108028	119922	108445	78654.1	89297.1	97656.1	110198	117850	115293	122429	114960	114850	27937.9	35914.7	58673.9	102079	100445	97240.8	141025	142363	142498	143568	112104	140749	118461	98227.3	113875	79863.6	103446	106961	145414	156024	144376	157032	145810	154750
met_2980	630.096	0.524	28.416	221.34	Unknown	Unknown	9932.43	11680.9	8349.13	9337.83	8240.89	10619.4	8788.72	9106.57	13920.3	6615.65	13155.4	8957.12	20172.3	16251.9	20061.3	32832.8	29207.1	20758.7	21413.2	21629.8	24837.8	20925.6	22537.1	19690.5	16642.3	12593.9	16232.7	7959.79	15034.1	19958.6	13901.4	17252.2	16271.4	13851.9	22795.8	18647.4
met_2804	395.11	0.526	23.154	182.24	Unknown	Unknown	8218.79	12251.6	6023.05	6097.59	10399.6	15048.6	17000.2	10287.3	21715.9	3780.32	18234.2	11916.2	37061.2	27100.6	24913.9	5579.08	12860.2	8238.55	15932.6	23590.1	16949.6	34664.1	20798.3	44168.1	25079.1	21608	3578.12	16799	18596.6	18491.2	56660.7	23662.7	24225.9	17644.9	10404.9	14884.7
met_4730	237.091	0.526	29.655	239.08	Unknown	Unknown	7278.97	5835.72	6964.44	3061.97	9392.21	8453.23	3717.74	14252	12011.4	10388.1	8028.59	11999.3	3968.91	11022.9	16052	4586.36	4074.62	5791.45	9597.48	6522.23	9974.55	14392.1	7981.2	25768	13731.1	15362.6	6576.2	8121.91	3770.59	8642.03	10597.2	9921.66	7545.35	8792.88	7264.4	4493.88
met_824	237.091	0.526	22.783	183.18	Unknown	Unknown	72389.6	90257.4	64200.1	40014.4	87842.6	85789.1	37017.3	54792	43633.4	99985.7	61350.1	39333.2	34987.9	45379.6	53921.8	72400	101364	45550.7	82138	81266.3	85907.9	61841.3	81657.9	57067.2	80908.5	47370.2	65090.2	66395.3	84841.7	90107.5	4297.71	47476.5	60821	58982.1	115388	97458.1
met_4722	712.098	0.527	29.913	232.56	Unknown	Unknown	7268.91	5955.33	5124.89	3419.66	11764.6	4828.52	5013.64	5872.39	6296.52	3182.11	4638.87	6413.77	13608	13061.8	10299.8	20409.2	24998.9	12198.9	12369.2	13238	13216.8	11878.3	7111.48	9358.57	11686.2	5457.69	9261.52	10817.8	11674.1	18016.7	8580.13	13228.4	11720.7	9617.12	8020.28	11574.4
met_480	361.104	0.527	22.614	178.46	6-hydroxy-7E,9E-Octadecadiene-11,13,15,17-tetraynoic acid, [M-H+CH3COONa]1-	Unknown	608433	599346	522185	78654.1	89297.1	97656.1	110198	117850	115293	122429	114960	114850	169999	193761	329467	102079	100445	97240.8	141025	142363	142498	143568	112104	140749	567829	577193	534381	79863.6	103446	106961	145414	156024	144376	157032	145810	154750
met_82	661.177	0.527	29.451	229.25	Unknown	Unknown	72001.7	918066	72663	556323	175339	107832	640118	983501	677462	1161951	53578.9	615722	679509	894618	878692	92444.1	106198	760325	1027598	1017934	1004199	805424	1091444	752573	1040634	839389	1078699	382223	713822	51133.4	394620	970169	1018205	1.07822e+06	1239470	1084697
met_3060	785.191	0.528	32.513	252.5	Unknown	Unknown	75583.8	69373.6	71633.6	78654.1	89297.1	97656.1	110198	117850	115293	122429	114960	114850	16729.6	19370.7	41644.7	102079	100445	97240.8	141025	142363	142498	143568	112104	140749	71885.7	58174.6	72021.4	79863.6	103446	106961	145414	156024	144376	157032	145810	154750
met_63	319.094	0.528	22.846	181.18	Unknown	Unknown	936275	768511	949613	694473	375800	1556483	746772	740283	568910	996760	856226	672232	532940	678013	720626	890425	1086288	686856	1149505	736695	1238115	575565	1145291	543992	1137678	986727	1297172	527982	1163398	1281890	504028	702292	737263	701532	1491655	480167
met_90	401.097	0.528	22.909	180.18	Unknown	Unknown	713954	563031	713849	511024	982664	850864	381067	576383	374310	746097	628015	500929	603222	515803	540530	680228	805252	494537	870756	551145	977650	422191	853011	410105	794136	660276	970664	398987	932831	962120	402177	546393	564837	537592	1120632	926087
met_2450	361.104	0.53	24.411	192.82	6-hydroxy-7E,9E-Octadecadiene-11,13,15,17-tetraynoic acid, [M-H+CH3COONa]1-	Unknown	94844.2	86407.3	82558.6	78654.1	89297.1	97656.1	110198	117850	115293	122429	114960	114850	22170	28084.6	53079.9	102079	100445	97240.8	141025	142363	142498	143568	112104	140749	97183.8	85308.3	86764.2	79863.6	103446	106961	145414	156024	144376	157032	145810	154750
met_6335	497.171	0.53	28.537	223.55	Unknown	Unknown	9300.03	8271.51	5528.07	11780.8	7198.29	6173.97	4931.86	3620.75	6838.28	9958.99	4470.25	10594.6	7869.14	7888.13	6276.55	4662.27	3841.14	13001.2	2452.76	2589.91	6350.66	8677.6	4813.02	15497.1	5743.26	9823.27	6286.4	18312.2	8694.91	1498.75	18586.7	4002.91	4093.81	4907.06	6086.54	1803.19
met_2124	443.107	0.531	24.49	192.18	Unknown	Unknown	119054	105659	96303	78654.1	89297.1	97656.1	110198	117850	115293	122429	114960	114850	29455.8	32272.9	57883.5	102079	100445	97240.8	141025	142363	142498	143568	112104	140749	98169.4	102929	99865	79863.6	103446	106961	145414	156024	144376	157032	145810	154750
met_98	565.103	0.531	26.937	210.23	Unknown	Unknown	723347	512050	798846	290773	1097845	1092521	308889	584064	303632	785702	291393	214459	345259	417290	500756	301826	824254	427126	569465	443608	857958	225769	519904	290742	605724	427269	721563	179312	1684688	1056470	181458	464977	496802	1215452	796791	622469
met_2305	525.11	0.534	27.01	211.17	Unknown	Unknown	114316	97385.2	99205.3	78654.1	89297.1	97656.1	110198	117850	115293	122429	114960	114850	23396.8	27784.6	51641.2	102079	100445	97240.8	141025	142363	142498	143568	112104	140749	97027	81000	102675	79863.6	103446	106961	145414	156024	144376	157032	145810	154750
met_3097	607.113	0.537	28.583	222.84	Unknown	Unknown	74129.6	65453.6	73918	78654.1	89297.1	97656.1	110198	117850	115293	122429	114960	114850	17518.4	19197.5	36247.1	102079	100445	97240.8	141025	142363	142498	143568	112104	140749	72149.1	57706.5	82059.2	79863.6	103446	106961	145414	156024	144376	157032	145810	154750
met_2745	319.094	0.538	29.159	231.86	Unknown	Unknown	28050.8	16015	17490.2	6838.77	16704.7	19304.7	13488.8	31793.7	8543.04	24577.8	5409.75	42215.6	34069.9	18132.7	13017.3	6111.02	25869.4	52410.9	22974.3	8290.21	14832.4	17717	15441.9	24628.8	17300.2	24352.1	10323.5	5975.18	9608.74	37195.5	18191.3	14770	16837.9	17302.4	18890.2	25527.6
met_6393	321.018	0.539	20.831	164.97	Unknown	Unknown	5238.04	5751.58	8840.76	6386.67	6602.02	6909.11	6354.36	6398.63	7365.78	8886.54	8714.26	5229.26	15489	11897.7	9357.4	7255.67	9098.1	7017.39	8948.08	6723.45	6142.2	13594	8995.48	15470.5	8120.93	13915.5	10677.3	4036.71	7738.41	10277.2	16659.3	7696.75	9568.24	6201.59	5452.3	6879.11
met_8448	269.087	0.545	32.797	263.04	Unknown	Unknown	3037.08	155509	140098	78654.1	89297.1	97656.1	110198	3603.96	115293	6292.02	25192	4392.2	200928	174561	8721.64	8327.72	3593.36	97240.8	7247.08	142363	142498	4745.54	9646.15	140749	172799	201159	171479	5186.86	103446	106961	145414	5967.92	3401.51	157032	6404.95	7796.17
met_610	893.115	0.547	34.68	268.92	Unknown	Unknown	161532	86957.4	183632	249749	276703	322832	28005.8	109316	69439.6	173401	102680	57703.1	45407.4	54749.6	83405.3	152663	176559	64096.1	79615	58834.9	90638.6	98130.9	77504.7	92432.3	125674	67287.7	172066	216394	255432	271471	19874.4	76270.7	74538.9	107634	138980	123753
met_1686	469.028	0.558	26.108	204.67	Unknown	Unknown	55133.5	20470.4	56556	10990.3	67143.1	100712	13967.3	34216.6	11110.2	54481.4	22867.4	13760.9	17630.6	17603.3	30774.2	49116.2	45958.5	22211.7	27651.7	17651.1	33571.1	11436	22201.8	25084.6	39031.2	21695.4	55296.7	32886.4	103446	58138.4	27572.5	15937	17992.4	26590.3	39808.9	39610.1
met_685	387.026	0.558	26.037	205.34	Unknown	Unknown	180492	75704	177544	78654.1	224285	275086	57004.7	91556	62531.7	173512	74803.8	65392.6	43894.9	174561	91755.8	133019	159762	67098.5	85802.4	50699	91886.2	29928.4	62158.8	70613.1	96312.3	61423.9	182983	79863.6	103446	191670	94021.2	56095.8	69037.3	86567.2	112284	121776
met_2072	483.099	0.56	28.437	222.94	Unknown	Unknown	43188.7	27209	48961.1	12001.9	6178.94	67243.8	14641.5	30496.9	20797.7	19973.9	32939.2	17282.7	25979.2	17032.4	26277.9	7264.37	8372.19	23349.7	22938.4	19344.5	29427	8923.65	25892.7	11310.4	34032.2	22590.3	35347.3	4990.71	13305.5	63619.8	4400.27	21759.4	25759.3	32706.6	39423.2	42100.9
met_278	305.023	0.56	22.051	175.14	Unknown	Unknown	422025	182936	410277	214158	498938	551695	87663.7	191463	174155	468103	183819	100499	241493	119546	243845	362528	420165	203203	251323	169731	399857	210021	170674	92858.6	211389	174406	436448	72110.7	194731	495781	55994	238102	165104	218355	318003	272861
met_573	223.02	0.56	21.985	177.28	Unknown	Unknown	200793	78496.9	197907	101566	234994	279058	42415.9	92036.3	38939	221439	85801.9	45555.9	109879	101015	119710	161126	203427	104354	124652	74040.5	115413	42446.2	80888.1	45243.7	109240	80674.1	206476	40083.6	61200.4	226321	28307	113663	82119.7	145706	154298	136024
met_6281	497.17	0.56	29.835	233.82	Unknown	Unknown	6659.96	6772.79	2396.6	28905.8	3807.39	5360.15	2098.13	5827.43	22934.5	6987.86	4971.18	4367.13	5813.27	6029	3534.88	1622.14	8750.56	5917.24	2720.67	7186.15	5914.38	2823.24	6651.65	8678.09	3535.98	6848.77	5231.04	12935	8451.03	3697.69	27905.7	4142.99	1780.44	6108.13	4501.83	2864.7
met_613	387.026	0.562	22.098	173.93	Unknown	Unknown	209348	86893.6	194954	81367.7	257970	268603	44505	88351.8	82802.8	235600	93322.1	50997.1	48462.4	81955.5	118343	171413	203262	101004	125028	79940.5	131664	98980	83939.7	99240.1	96905.6	82078.4	201416	60160.9	111703	235268	93200	112228	81124.7	157316	147783	125064
met_52	980.016	0.563	32.112	248.48	Unknown	Unknown	2555401	1.40044e+06	1990937	1752074	1.25206e+06	1.50887e+06	1642569	1.10674e+06	2029078	2215190	1610040	2133169	2008315	1.75661e+06	1.74873e+06	1760140	2082572	2251635	1.37041e+06	1617395	1.47941e+06	1632592	1.19985e+06	1816119	2203290	1.81766e+06	2171803	1.75332e+06	1518232	1.61257e+06	2.27775e+06	1.94059e+06	1.65991e+06	1596722	1.87389e+06	2209981
met_1501	478.983	0.564	24.137	188.95	Unknown	Unknown	56112.2	49328.1	59248.7	32772.8	37566.6	42817	29596.9	28002.8	24142.8	47137.8	32479.6	23454.4	27095.3	32837.5	34086.1	64301.1	29868.2	35789.2	25549.5	26200.8	22248.4	17037.3	24008.5	21641.1	38783.3	54419.3	55903.4	32886.4	29348.1	66970.6	27783.6	27762.9	23741.8	4706.02	33052.7	26851.3
met_4286	314.978	0.568	24.055	190.98	Unknown	Unknown	19153.8	16858.4	18313.8	13626.6	24178	7826.36	8900.46	8794.51	4370.78	3422.8	11084.7	10040.4	9877.77	6499.4	11851.8	15121.2	18934.5	9312.44	10468.9	22989.2	10112.6	10457.6	11068.5	6504.77	12029.5	17041.9	19424.8	11095.1	9890.66	18890.8	8460.35	6199.76	9044.31	12833	7415.38	12684.9
met_14108	279.101	0.569	24.361	194.48	6-hydroxy-7E,9E-Octadecadiene-11,13,15,17-tetraynoic acid, [M-H]1-	Unknown	4715.68	6488.59	6269.56	78654.1	89297.1	97656.1	110198	117850	115293	122429	114960	114850	200928	174561	3498.62	102079	100445	97240.8	141025	142363	142498	143568	112104	140749	4627.28	5886.2	7736.31	79863.6	103446	106961	145414	156024	144376	157032	145810	154750
met_3568	352.009	0.57	23.285	184	Unknown	Unknown	9042.87	5538.69	9313.49	7389.53	10742.4	24580.7	26573.3	6328.46	23467.7	8209.91	23349.6	28641.2	11711.1	12905.6	11953.7	28034	16187.5	20796.5	10023.7	8904.81	5095.28	11734.2	8369.81	23454	7955.78	27842	12682.3	28576.7	19336	16657.3	2669.45	12419.5	14035	11934.1	12332.6	6333.17
met_2269	351.031	0.571	20.698	163.34	Unknown	Unknown	18433.3	24932.6	14814.2	40747.9	28627.7	10202	25975.9	16828.4	20961.8	9672.38	23563.9	31672	22393.1	25253.3	12700.6	8058.49	25281.9	19303.9	8875.8	13080.8	10504.2	18234.9	16299.9	10551.5	34467.1	18876.4	11640.8	25110.1	6146.38	11093.6	23546.1	25465.9	13338.8	14572.1	7965.17	7534.82
met_6750	336.96	0.581	22.034	174.29	Unknown	Unknown	1855	6572.04	11241.8	17433.1	7701.4	2805.98	3641.79	7221.24	3901.09	4723.55	7346.47	4203.52	4316.77	7780.42	9193.02	8331.44	6212.86	6491.04	7311.51	17568.9	7584.89	8862.99	15525.5	13532.9	5047.17	12307.8	5546.67	4324.9	7131.59	6731.81	5138.52	6408.78	6362.2	4844.2	6893.95	6644.55
met_6326	247.013	0.583	20.646	165.43	Unknown	Unknown	7241.35	7358.42	9630.6	4786.97	3049.69	8496	6384.3	7001.73	6219.52	9698.96	8003.4	10613.5	9946.19	7921.44	11166.9	8841.15	7382.72	8046.84	10064.4	6772.62	8622.65	10548.2	11232.1	11453.2	7354.1	5141.77	6575.44	4684.5	8155.42	4717.64	5619.78	8015.87	10741.4	4239.69	7836.82	11290.7
met_3043	507.986	0.586	24.579	192.13	Unknown	Unknown	15658	14295.1	17582	37100.1	841.002	25409.6	17936.2	22731.4	30581.6	40197.1	21814.8	13864.9	14134	15567.6	33414.2	17549.4	10542.8	25051.1	30852.1	25197	32934.9	16811.4	25787.3	17524.5	7573.48	5893.97	17353.3	23244.1	3133.31	4069.1	16328.4	23543.1	20836.7	17962.7	16753.4	24502.1
met_9821	223.02	0.587	23.98	193.56	Unknown	Unknown	1899.14	2294.66	140098	78654.1	4335.5	5614.98	5957.68	117850	115293	122429	114960	114850	5581.48	4523.79	5298.74	102079	3486.15	97240.8	7765.35	142363	8705.74	143568	3795.01	140749	6658.69	9013.67	171479	79863.6	103446	106961	4511.28	156024	2629.57	157032	6524.98	154750
met_357	431.108	0.589	23.835	187.13	Unknown	Unknown	151959	80707.8	156213	23537.5	243087	235943	57952.5	176400	60277.4	209762	181009	116224	69499.7	138214	198133	81283.6	317113	92585.8	298814	274840	330301	188232	266498	140217	156251	70830.7	190442	24980.9	175413	281053	27382.9	182623	212065	153034	294132	251204
met_4137	893.114	0.598	34.671	268.79	Unknown	Unknown	11182.5	155509	4446.03	28307.7	38158.2	19517	34652.3	117850	31824	122429	114960	114850	200928	174561	166492	10275	15498.5	97240.8	141025	142363	142498	30155.7	112104	28520.4	5961.58	201159	171479	12317.8	103446	6504.32	14740.7	156024	144376	157032	145810	154750
met_9019	497.17	0.6	28.209	221	Unknown	Unknown	4960.49	3913.93	140098	78654.1	89297.1	4663.8	110198	7829.9	115293	3554.69	4207.97	5343.41	200928	174561	166492	7198.88	100445	7744.88	3989.41	142363	142498	143568	9538.78	6765.92	172799	201159	171479	79863.6	103446	4476.09	145414	6540.32	3891.62	4338.01	145810	4476.89
met_1802	774.11	0.603	30.314	235.34	Unknown	Unknown	29508.1	18151	19574.9	28264	19826.9	20933.7	11230.7	40736	12620	36534.7	39828	25053	16571.6	20451.9	36428	28742.8	25950.8	15307.9	37476.4	49498	26922.2	30484.5	38029.8	19346.9	24261.5	21773.7	28586.4	24370.6	31038	24633.9	24551.2	28504.5	38216	26613	24165.2	36060.8
met_75	497.171	0.603	25.629	200.55	Unknown	Unknown	1238372	518300	691329	308721	2191383	1591929	419314	573591	382991	449029	1426084	403102	677547	1173448	310284	439273	562223	554360	571192	1593823	1108817	97711.7	1353181	428984	1291614	365586	1227415	132351	1697033	1801578	752750	570729	1471219	1250052	1517790	976975
met_2614	357.045	0.605	21.234	167.54	Unknown	Unknown	28905.9	39281.4	33811.6	78654.1	89297.1	97656.1	110198	33100.8	115293	122429	114960	114850	200928	174561	166492	102079	100445	28026.4	38435.7	39249.7	31387	36720.7	112104	47770.8	172799	201159	36100.2	79863.6	103446	32475.9	9796.85	55879.8	33218.5	27863.2	16810.5	154750
met_1438	201.038	0.608	33.951	276.64	Unknown	Unknown	25369.8	11729	71766.9	23672.8	9573.95	27392.1	13616.2	161505	39460.4	27362.1	64773.8	17685.8	22853.2	4697.85	9374.02	73104.3	72070.5	22069	25777.8	133100	35217.8	68773.9	125209	25814.7	78180.9	25722.8	5651.32	25578.5	32512	46822.9	21495.5	4493.86	28635.5	26016.2	96460.2	23481.3
met_3179	387.025	0.608	26.071	205.57	Unknown	Unknown	18208.3	10600.1	18285	33845.3	49727.9	26664.8	49489	117850	32560.3	122429	114960	43936.4	200928	48215	166492	15370.7	23972	97240.8	141025	142363	142498	143568	112104	30140.3	13990.5	201159	9238.84	29413.5	103446	9121.05	25348.2	156024	144376	157032	145810	154750
met_3689	752.127	0.613	30.248	234.94	Unknown	Unknown	11334.8	7475.39	10874.3	6559.23	9722.41	5163.29	6144.22	22642.1	6212.26	11421	20396.3	18717.1	11879.6	18278.7	12742.1	14411.2	11522.6	3216.72	20969.5	28930.4	14575.7	21341.5	20385.5	13881	15036.3	9302.67	12772	9998.69	9525.95	3114.38	14583.9	18222	17149.1	12935	12326.5	20176.7
met_520	721.198	0.615	30.753	239.08	Unknown	Unknown	114218	46351.6	126097	73925.2	65041.1	60883.7	95401.4	151992	40493.2	161569	153871	87788.5	45317.2	93022.8	146034	121333	126609	53581.8	235883	237545	186453	157924	235678	48252	119354	38469.5	144555	97785.2	96339.8	107352	88549.2	134373	167796	105786	145549	215103
met_1653	305.023	0.616	23.947	190.36	Unknown	Unknown	36039	17855.8	30136.3	53115.1	70737	46116.1	37331.3	33432.4	54627.4	16876.7	19403.7	67587.1	64236.9	70598.9	32820.7	28197.9	43061.2	8467.86	37574.6	36735.4	35330.1	50402.9	6961.8	48308.5	21245.1	21269.1	22272.9	49607.9	33194.4	25047.9	45157.5	35639.1	31834.8	29708.7	35811.1	8540.78
met_648	685.145	0.617	29.949	233	Unknown	Unknown	93739.8	36212.8	86017.8	7016.56	17342.7	19118.1	32917	130513	41045.8	147402	127805	73443.1	52506.1	86477.7	150675	91239.1	76534.2	45909.7	226393	184626	179229	116463	175242	78418.2	100410	39886	130134	39191.9	51457.3	53589.6	13025.9	119353	142427	130341	143900	185424
met_6080	569.014	0.618	28.203	220.18	Unknown	Unknown	5945.39	3969.54	4872.62	7093.31	7408.8	8483.39	9063.92	5513.58	6285.96	8427.99	16013.6	12252.8	11284.7	10972.3	10427.9	6416.31	4025.31	7723.07	12807.1	10360.2	7181.8	13570.5	10879.3	19797.4	6820.11	6879.54	8460.67	8533.31	6786.2	9703.79	8462.01	19458.9	10861.4	7143.3	9783.32	7032.54
met_1223	626.043	0.619	29.525	230.1	Unknown	Unknown	29429.5	20270.5	26695.9	9630.52	18427.6	5494.5	33142.3	67177.3	35204.4	51592.3	57412.5	57984.6	43836.7	60514.9	72851.5	37581.5	30497.2	43283.8	79583	80765.4	60173.7	77373.6	78736	57454	39147.5	23085.3	37574.4	14767	27409.2	12700	17482	74593.7	68818.9	44307.4	44039.9	58276.6
met_1687	640.114	0.619	27.73	215.88	Unknown	Unknown	23076.8	20954.3	24921.5	11482.6	14888.1	12020.2	26212.7	38795.1	29038.6	26675	47587.2	39933.1	22615.1	38064.5	33547.9	27230.2	18613.9	25560.5	32320.5	53996.9	24586.8	45933.5	44423.1	34995.1	26704	16363.9	21964.7	6883.37	32319.8	15688	12717.8	45858.8	41943.7	23849.7	22085.4	32599.1
met_1941	738.056	0.619	32.483	252.54	Unknown	Unknown	18051.3	14154.3	21207.8	16978.9	899.599	12629.7	15685.2	40538.2	5653.89	35840	38658.5	28925.4	20051.5	30537.9	38795.1	27303.5	23417.2	21497	53589.7	48117.7	38970.8	40205.8	46041.7	31338.5	27655.5	15121.1	19985.9	3918.67	29023.4	5082.55	15551.6	35390.6	45191.3	30589	31459.4	44719.8
met_198	237.091	0.619	27.04	217.82	Unknown	Unknown	290836	325897	130144	282290	459390	375649	305505	382504	169617	300406	474104	257095	222193	226081	269746	368620	449134	228886	359400	235892	292776	303007	420404	191168	378670	310839	282293	311001	329296	363439	308687	431126	423126	228384	298060	317644
met_3245	375.918	0.619	23.325	183.88	Unknown	Unknown	13080.1	3194.66	10614.9	13886.8	12864	16528.3	42413.2	10584.4	42311.3	11832.1	13229	23573.7	26146.6	16638	9463.27	10536.5	2379.52	18632	7557.42	12639.5	10518.7	29405.8	7761.79	49252.4	10742.5	6663.94	16666.2	39223.2	15562.6	13951.2	85978.2	12635.6	9407.19	12332.9	11270.2	10978.2
met_3713	662.096	0.619	30.249	235.53	Unknown	Unknown	11567.1	12278.1	11630.5	10234.3	12393.4	3782.44	8207.56	21322.6	10153.8	11207.8	17584.3	17049.6	7749.91	13985.1	15898.1	11251.2	10856.5	10539.1	16014.4	25274.7	11089	23343.7	20280.6	17423.3	7182.11	6642.98	10975.7	2366.2	13627.4	7892	14439.1	18489.3	18775.3	10634.3	9964.17	18026.5
met_5092	434.011	0.619	25.108	197.2	Unknown	Unknown	5617.84	8631.23	8584.23	5291.56	8635.43	5777.35	17285.8	9215.5	13043.6	6144	8558.67	15124.3	10792.4	8388.21	9408.79	5097.63	5166.03	8151.49	7024.85	7652.15	4745.41	17196.8	5333.6	15755.9	2994.1	7427.75	8545.42	11470.7	6537.75	10969	13543.3	8469.28	12891.3	9432.38	5129.77	7641.89
met_5849	470.065	0.619	26.34	206.49	Unknown	Unknown	3961.28	6781.42	5201.81	8428	7388.55	4747.45	12954.1	11999.6	10199.2	7413.77	12189.3	12249.5	8424.79	5560.26	1266.11	7674.91	4107.02	7736.4	7227.35	10798.8	2503.61	13253.3	6161.38	6988.14	8029	6060.24	5172.37	7456.59	5437.44	7075	1969.9	1908.33	6990.77	6341.46	4019.36	7092.77
met_644	475.189	0.619	27.224	213.43	Unknown	Unknown	100659	26486.3	92648.2	44063.5	86249.3	88458.7	95078.8	49573.9	64596.6	126027	103332	142682	107028	75373.5	106683	160900	155233	25089.8	117758	121927	119830	39202.7	157065	85220	155800	108059	129691	27169.7	119130	159605	24840.5	161395	70510.4	43996.2	146326	132238
met_785	537.078	0.619	26.586	207.71	Unknown	Unknown	62092.3	25637.1	59251.9	35547	38759	29396.4	37906	101240	43278.4	119309	96189.9	64887.9	59686.9	76407.3	140552	66194.6	48183.3	43347.9	177038	143831	152120	105655	149338	88916.2	72067.8	30728.3	93004.4	14453.6	66220.6	23695.8	21768.9	103987	120438	116608	110418	134094
met_964	514.029	0.619	27.155	212.44	Unknown	Unknown	44225.9	31173	39481.8	16738.8	6896.85	11602.7	62047.1	78305.6	60412.6	60135.3	73420.4	82451.2	67894	70898.9	77403.8	52187.7	36675.1	59167.6	88690.6	88412.4	67954.9	104300	83529.2	100303	54893.4	34282.9	41462.3	24685.9	41742.6	19231.2	34803.4	91058.3	79010.7	64553.3	46429.5	74037
met_1352	343.981	0.62	20.803	164.3	Unknown	Unknown	16558.2	15602.1	13409.5	19166.1	18529.6	20515.6	57991.3	36205.4	59463	30474.5	40335	52753.9	53757.5	38793.1	49961.2	24902.3	14510.9	38841.8	47343.8	59929.9	42192.7	70710.7	45229.1	82182.9	21216.8	26465.8	20833.2	45232.8	25569.6	8548.12	73782.7	53804	48874.1	43637.8	24284.6	37994
met_1354	598.937	0.62	26.061	203.05	Unknown	Unknown	20452.7	11028.4	15719	27141	22429.1	19470.1	66051.4	39489.2	70670.2	24889.7	35266.6	66127.6	59786.3	52344.6	42686.7	27705.9	17506	55637.8	30985.5	47606.1	28771.4	71380.9	42660.9	88582.8	18560.9	31699.6	21149.6	54192.4	31574	16875.2	85912.6	52562	41253.4	43284	26924.4	28902.8
met_1355	231.968	0.62	24.459	197.05	Unknown	Unknown	25479.4	20157.2	21807.7	15913.4	28841.6	25375.6	41034.4	46360.6	77967.3	33549.9	48586.7	50268.1	46616.2	51257.7	38553.5	19463.1	22956.6	54727.5	43711.2	52854.1	38106.2	102562	43693.4	61233.6	25128.4	22298	24290	32080	26794.8	9268.67	31578.5	57727.2	36972.6	31293.6	22307	44850.7
met_1650	457.001	0.62	26.088	204.67	Unknown	Unknown	18417.8	14365.7	15991	8331.72	7196.43	8059.32	35994.6	39047.4	42825.2	23218.4	34313.3	42393.9	39681.2	43827.6	45639.1	7328.64	17773.5	30179.7	43060.8	56359.8	30655	55322.4	53033	63507.7	18881.8	20083	18421.9	23092.9	26105.4	5495.85	41380.2	54016.4	46178.8	27741.2	29801.7	29622.4
met_2158	434.931	0.62	22.348	175.27	Unknown	Unknown	5006.15	6767.7	12072.9	25296.5	18291.3	12892.6	53281.1	12653.8	45531.3	6656.84	13355.5	29612.4	38340.5	22617.5	18344.3	8135.46	11915.6	28355.7	9269.2	18763.6	6663.36	33562.4	11097.1	50574.2	8178.98	14769.7	18160	61695.3	23818.8	17697.6	101460	22113.1	15593.9	28856.4	6019.24	5956.77
met_258	455.994	0.62	23.678	185.57	Unknown	Unknown	171779	132002	123115	89318.6	65118.8	58412.4	279779	284377	293993	242778	262225	320609	296794	281691	371743	186386	121231	272765	351287	406476	320454	409122	342761	495930	159995	157452	173703	180246	176182	64623.6	301730	351732	318884	193308	183543	274793
met_2605	680.02	0.62	28.723	223.41	Unknown	Unknown	19693.5	10821	14624.4	15922.4	13880.8	9058.13	14645.1	24422.4	15148.4	27748	26212.8	23004.8	18300.7	21020.7	33549.1	17724.5	18923.9	16978.8	32115.9	31170.6	25411.5	26815.8	30165.6	23752	12910.5	12655.4	20406.1	6264.52	22678.9	10177.3	10569	26947	28518.5	11087.3	17634.5	30415.4
met_2662	747.004	0.62	29.424	228.5	Unknown	Unknown	5973.78	9994.31	3782.05	11437	12761.5	8210.3	24314.7	22762.8	29219.7	14078	21085.4	28797	26036.4	25135.1	20860.9	14341	8057.6	22145.3	19404.4	24651.7	13178.2	34742.1	26542.6	40001.9	16253.3	13160	5975.32	12959	11420.3	16672	22486.4	29674.6	22902.3	20026.6	13156	11699.2
met_2699	618.132	0.62	28.199	219.73	Unknown	Unknown	10279.8	9896.59	12721	11573.6	14227.5	3893.03	16031	8543.3	22253.4	17066.1	20743.1	24616.8	18785.4	17924.2	23821.9	11682.1	9942.2	18358.3	18242	25788.6	15676.1	29668.6	16543	25815.7	12839.6	8509.17	9596.02	5913.69	14242.3	7891.28	10859.4	24380.6	24295.6	15683.3	15242.5	15210.8
met_2935	487.931	0.62	25.768	201.75	Unknown	Unknown	8228.56	3951.05	9029.35	11872	8749.99	7819.35	43540.9	11794.2	39051.9	5651.04	11800.7	27713.9	28793.9	21175.6	11835.4	8485.66	3564.75	15762.8	9779.74	11878.2	6743.88	27442.3	12483	48707.6	4921.62	7828.42	10690.7	34090.1	9738.96	9268.33	66069	21211.4	15737.7	5511.69	4352.22	5679.64
met_3279	231.968	0.62	23.703	190.9	Unknown	Unknown	14478.2	17265.7	15725.3	12137.2	24538.1	21449.2	28831.6	16952.3	28186	15759.1	21770.8	18011.8	16113.1	25665.1	32129	4908.69	15636.5	22748.2	29712	35179.6	17492.8	25106.2	29402.5	36787.1	15509.6	12085.2	15029	16636	18314.1	21193.7	27968.1	20580.2	40596.2	20187.8	15854.5	21543.4
met_336	425.065	0.62	24.017	188.65	Unknown	Unknown	172625	73426.6	154783	22467.5	116493	26035.2	107925	220002	123148	268288	232627	186112	141170	196531	326468	189235	135154	147781	412695	340285	323190	266334	333455	233967	161191	93117.3	219571	42159.3	143020	81891.1	78607.4	256370	281614	210005	252534	320318
met_361	231.968	0.62	20.685	166.3	Unknown	Unknown	86842.9	71270.2	66027.1	93968.1	98810.1	104291	263091	163504	254218	126316	161984	229481	258088	194846	213807	95511.1	68013.5	201014	194424	257809	189204	324680	206077	430339	90149.9	103867	80219.1	191086	143059	22292.3	387047	250438	205722	179672	114779	143655
met_833	380.034	0.62	24.034	189.48	Unknown	Unknown	32832.8	37612.9	28162	40170.5	31534.5	28072.5	106947	70459.5	106109	45490.2	79104.5	100601	101003	79208.7	74147.5	47389.7	31632.6	73023.1	67686.6	106232	50147.6	140263	77825.7	144280	41924.9	46150.9	33540.6	58638.5	40460.5	41606.1	117463	93721.2	84850	69650.6	33158.9	52786.9
met_8790	634.991	0.62	28.66	223.23	Unknown	Unknown	136689	155509	140098	78654.1	89297.1	97656.1	14408	5957.8	9834.62	122429	114960	114850	11368.1	9354.89	166492	102079	100445	5977.24	924.447	142363	142498	143568	112104	16425.9	172799	201159	171479	7606.98	103446	106961	11221.1	9532.52	3607.05	157032	145810	154750
met_903	349.104	0.62	27.976	221.6	Unknown	Unknown	69630.9	73489.7	136360	95360.4	97785.2	83182.9	75055.1	95604.4	80072.5	95290.4	133433	72561.6	88029.1	48077.7	159897	106841	90907.9	73409.6	57668.9	165463	78324.9	95504.4	121294	47276.8	54887.3	93879.5	83535.4	81237.4	127986	94315.6	91724.3	124292	117632	103492	83645.3	105995
met_977	604.061	0.62	27.223	212.16	Unknown	Unknown	48520.1	39635.1	48444.8	23547.2	7803.5	10896.6	53421.4	74735.8	57510.9	53740.2	64046.9	65547.4	58302	65288.4	84645	40093	33598	59534.8	72553.6	108669	66407.9	108274	89095.8	83945.6	48477.3	40202.6	47847.9	29805.8	34273.7	30837.2	30219.6	81823.3	91292.5	52939.2	47743	70205.4
met_1174	464.941	0.621	23.251	182.08	Unknown	Unknown	17557.7	25457.3	4083.61	70127.4	28443.8	21528.6	96033.6	27681.6	89356.2	16824.1	29104.6	56026.8	68468.7	36903.1	29199.8	24166	12093	59400.7	16749.9	31158.3	13540.3	63005.4	24823.6	97007.2	19234.7	36071.6	12313	117234	32111.6	27819.4	197460	45642.1	27649.8	35042	22227.3	18415.5
met_1238	313.97	0.621	22.837	181.23	Unknown	Unknown	27980.6	33662.5	22681.5	31682.9	39133.2	35147.1	81065.1	51096.9	77817.5	34785.3	50891.9	65764.7	56313.7	46160.4	34043.6	38555.2	32194.1	50844.3	32567	66750.1	27962.9	69665.2	40079	72842	31466.9	33661	25718.4	54516.4	40392.6	14074.7	71698.5	54793.9	45281	33599.9	24722.8	32892.1
met_192	461.118	0.621	24.691	193.54	Unknown	Unknown	313340	186734	330000	56961.6	121580	125468	182435	443839	215984	437946	452377	338103	255022	361156	497580	356365	342274	228765	632370	676983	513229	486364	580086	221449	330472	175986	389044	64110	340667	240849	96077	470351	545417	314541	431668	504537
met_2013	710.951	0.621	28.41	220.76	Unknown	Unknown	14767.3	17294.5	12247.3	12225.9	1593.42	4184.81	38902.8	33484.8	40414.7	19140.6	23641.8	34821.4	35780.6	31648.9	36055.8	19844.8	16191.8	34773.2	29042.4	34705.9	22054.6	40974.8	25409.8	48535.6	16449.2	19120	14406.1	22283.5	26105.4	4075.55	39300.9	43258.9	29364.6	22994.3	15464.5	21544.1
met_2053	313.051	0.621	20.675	163.88	Unknown	Unknown	23960	9297.78	19546.9	18635.6	13683.3	3074.76	16780.1	28416.2	16506.8	30456.1	30501	22242.2	16321	27110.4	31940.4	20826.4	18136	16821	47127.1	46768.4	34576.2	34382.8	43095.9	33733.7	20040.1	17010.6	26596.1	7457.42	25838.3	10705.2	12086	30435	33478.9	17152.2	29999.2	35363.3
met_2231	493.054	0.621	26.701	209.09	Unknown	Unknown	12140.1	13194	10505.7	10124.9	10869.7	12979.8	32151.9	28605.1	30178.9	15784.3	24738.9	27074.8	31040.7	30031	22511	14603.7	7618.64	19603.2	24267.1	36408.9	16739.5	46634.5	28951.3	39549.6	15797.7	17029.3	12843	9796.22	13391.2	13707.1	21476.3	39738.5	30973.4	16204.3	11507.1	19160.8
met_2531	419.047	0.621	23.758	186.68	Unknown	Unknown	8652.33	8677.34	7050.98	8623.65	7979.21	8773.1	31923.7	15376.8	30294.3	13439	16290.3	25973.9	30291	20140	26417.1	12011	4789.63	16343.1	24305.3	24077.4	14042.1	32543.2	22166	45297.4	14146.4	13943.2	11570	19094	11433.1	15531.6	34888.3	29547.4	25166.5	18108.3	16648.9	14200.9
met_2624	492.047	0.621	26.468	207.24	Unknown	Unknown	11668.6	13900.8	8411.16	15740.6	21016.9	5294.39	27107.9	18769.2	44963.7	9016.93	15797.7	33449.6	38307.2	26677.3	13256.2	16625	9682.21	30748.2	21282.9	23579.6	15205.7	33152.5	30087.3	22290.8	20306.5	2967.26	10973.1	15241.5	16926	15614.6	24451.2	35448	10184.8	15448.9	16619.8	17840.3
met_2797	604.06	0.621	28.802	224.59	Unknown	Unknown	13350.6	13786.5	7208.57	13215.7	6965.54	7399.7	14277.2	20698.9	21720.7	17833.5	26226.6	22975.3	16782.8	20709.3	20658	17551.8	17899.1	16606.8	20704.7	28857.6	14306.3	24036.8	26061.5	24332.9	17927.4	13442.2	13776.9	11385.9	12393.4	9691.1	15727.6	15309.5	22577.1	14028.3	9867.11	16567.3
met_597	349.104	0.621	24.635	194.87	Unknown	Unknown	91033.5	58379.5	73722.2	21365.6	59439.4	51234.1	61178.4	127614	101084	140784	123272	94146.2	113090	129017	152325	127322	90010.3	78612.6	142478	187530	108506	151874	160358	138190	88258.7	58969.2	104410	24910.2	91971.7	68594.5	41161.1	141762	163872	98673.2	97357.7	144819
met_6432	313.97	0.621	25.028	198.82	Unknown	Unknown	6857.53	8141.11	7608.2	6302.13	6810.83	7311.64	9761.17	8332.41	10779.1	6052.14	8354.06	11082.6	8452.54	6985.76	5992.05	9862.35	2841.79	7282.85	4248.17	10979.2	6593.76	11606	9045.78	13730.2	7223.47	2906.69	8501.26	5830.36	6300.49	8974.02	13521	9271.05	3788.88	7394.13	6411.06	5926.18
met_802	344.988	0.621	23.325	184.47	Unknown	Unknown	33504.2	31226.4	29207.8	32189	21169.7	32540.7	114902	73491.6	115990	45786.3	78878.4	105468	109586	94286.2	92147	56061.8	31858.7	65774.9	71479.9	111202	62531.3	157968	99728.8	180194	48775.7	46286.4	36625	73266.7	58526.5	11242.6	137990	107762	96440.9	73269.4	43064.1	50824.5
met_1010	307.034	0.622	20.587	163.31	Unknown	Unknown	18330.7	19121	17703.8	32489.2	28910.1	24075.2	106363	41468.3	112480	25218.7	46306.4	76523.1	92803.1	56107.2	56653.1	21696.5	15360.4	48249.1	41988	66685.9	32538.8	92870	55794.6	136809	26411.4	33061.6	18725.6	78098.6	51143.4	26297.9	168956	67083.9	56402.5	157032	28793	36208.7
met_333	201.038	0.622	20.571	166.73	Unknown	Unknown	141676	83065.2	114257	81279.6	25156	25765	235807	177224	243105	212968	185043	181506	210494	206420	276141	145407	121390	159857	290992	312587	241184	297406	263642	341593	142351	109604	173782	114850	133225	66955	254764	238150	247913	186767	197244	230781
met_4210	634.99	0.622	26.959	209.86	Unknown	Unknown	8972.26	6523.75	9841.14	8951.99	12171.7	13097.3	20469.7	5503.4	18702	6613.36	12997.3	18069.9	9157.74	11654.5	9275.86	6967.4	8397.64	16417.1	8929.2	12110.1	7333.98	20388.4	14456.6	19513.8	11510.9	8644.92	11270.8	13210.9	16484.5	10485.7	20625.2	15975.9	12024.5	11608.9	7876.47	7096.07
met_4974	375.917	0.622	20.473	161.14	Unknown	Unknown	2964.18	4036.87	2803.69	9967.13	6865.11	8152.67	20751.8	6386.75	17510.7	3421.86	4360.54	10293	16433.4	9000.61	6047.45	2916.03	2682.48	10762.1	2702.27	6981.28	4110.76	13041	10140.9	17756.5	9398.94	6467.65	5298.01	23916.9	6971.01	6693.24	35454.9	8745.54	4367.36	5355.44	6535.94	2457.22
met_914	232.975	0.622	20.482	164.59	Unknown	Unknown	44735.7	51793.2	12207.8	43370.8	4364.13	51368.7	134248	74363.1	135191	51480.5	85494.6	111683	136601	108195	63621	59035.3	42012.7	90078	67921	82293.4	61872.7	186740	118197	241942	50400.5	63612.4	39734.6	89411.8	101235	22538.7	208539	110959	75036.9	68689.9	53235.5	51424.1
met_928	357.046	0.622	21.231	167.49	Unknown	Unknown	67272.3	48493.6	64981.1	55901.7	42609.1	68458.2	85852.3	58447.2	143011	96432	78083.4	99916.2	51094.2	82643.9	54782.6	95275.6	66801.9	53514.4	53396.7	57249.3	55848.5	50638.1	62774.1	75757.9	53198	74308.2	60796.6	49845.8	40600.2	60389.1	51238.4	76047.9	74585.5	56377.8	40790	72442.4
met_7014	457.969	0.623	22.7	177.77	Unknown	Unknown	2222.74	6006.16	7186.21	5799.19	5077.24	5488.84	15149.8	7839.8	10823.5	10004.7	5188.72	9253.41	9393.73	7987.37	3451.8	7202.32	8085.62	6140.09	9227.67	3835.32	2247.09	12247.3	4307.32	11749.1	8338.03	3816.8	4314.2	12385.5	4844.13	5383.18	19018.7	7286.11	3669.67	6185.81	6436.58	7896.82
met_7273	307.034	0.623	23.685	188.21	Unknown	Unknown	5348.15	4545.35	5768.9	1860.98	5149.8	6062.46	9704.26	4098.9	8975.07	6669.92	5334.06	5528.72	7695.33	6485.08	6673.02	8513.6	4672.16	5831.71	7126.98	7637.65	2701.3	11576.3	7160.14	12978.5	4710.94	3246.3	4720.49	3146.38	5697.6	7148.64	9645.08	8977.3	6563.37	6055.37	2092.62	5451.34
met_878	201.957	0.623	19.759	160.03	Unknown	Unknown	37018.9	52569.2	33015	81040.5	40091.6	31161.7	128026	60891.6	119528	41354.4	64105.5	97434.3	90735.2	79632.9	55493.5	58677.2	43920.3	75209.7	36737.1	49584.6	31478	112859	40240.8	119006	43406.6	52087.8	30224.3	107314	52689	26718.7	140740	62776.9	54991	49257.9	26713.8	38051.8
met_2277	366.97	0.624	23.97	189.2	Unknown	Unknown	15837.2	15236	15485.1	2467.26	2799.8	1484.02	25759.3	21552.7	25726.9	20865.8	25888.3	32904.6	20788.2	21564.2	28301.6	21783.9	18270	16019.5	30814.9	37222.5	21245.1	38679.8	36596.3	53945.4	14054.8	15270.4	11321.1	12673.4	103446	8582.14	21644.2	31057.1	27258.6	24653.8	14112.8	20528.8
met_2581	231.968	0.624	22.698	182.7	Unknown	Unknown	24170.4	12940.3	18972.4	10586.2	5394.6	5600.21	21336.5	22849.5	20502.1	22612.6	19809.8	16122.4	21662.8	17712.8	24115.5	21662.3	32907.3	22397.5	22938.1	24592.1	18960	33196.1	15867.9	31948.2	16832.7	13574	23361	11441.2	14763.1	13562.5	16710.6	29050.6	21404	17028.1	13513.9	18234.8
met_3874	716.073	0.624	29.351	228.13	Unknown	Unknown	8176.56	15243.9	16864.6	5556.36	12121.7	6570.33	10259.6	8316.3	13772	13827.8	31975.8	15763.1	9239.62	14350.9	21564.4	18968.3	19533.4	14901.5	14298.7	30270.3	10965.2	18453.4	28749.6	8478.26	20046.8	11963.2	7344.51	1820.22	14168.4	9475.76	17312.6	13955	23065	10625.3	8445.24	18386.3
met_1471	344.988	0.625	20.673	163.25	Unknown	Unknown	28621.2	24657.3	25009.2	25228	29486	34997.6	58110.3	40524.6	56836.2	31764.9	37354.1	46137.2	48267	48638.7	45074.1	31521.3	24842.3	37997.1	40669.1	46301.6	35040.3	61999.7	47980.3	99570.7	30364.8	36023.2	27044.8	36726.4	32334.6	23705.1	80161.2	55456.6	47320.7	43026.2	25464.7	34220
met_165	201.038	0.625	24.477	198.83	Unknown	Unknown	543793	232998	329841	191989	163597	135696	602381	395603	521904	431319	720742	762939	330460	723036	437993	20050.3	491578	615824	613955	636450	361942	870811	590204	644752	494244	297642	298532	361133	466519	358918	387695	501001	521732	384599	388223	457178
met_2502	471.071	0.625	24.05	188.33	Unknown	Unknown	17613.3	15935.1	15701.5	18448	3690.24	13220.5	24042.5	21571.8	50030.9	14661	30670.7	29552.3	39115.9	24851.4	27127.1	18254.5	16749.9	23630.1	24990.5	36334.9	13453.1	43623.9	28805.3	36053.6	20971.3	17081.8	14988.4	20137.1	22362.2	19404.1	35840.3	42475.1	37208.2	29885	24303.8	15573.9
met_3435	375.918	0.625	22.478	177.13	Unknown	Unknown	16071.8	6237.04	9651.31	18530.5	11837.5	16199.8	38516	13082.7	25650.4	3005.05	5609.26	16463.6	31358.2	18557.8	9453.03	10121.9	10271.2	13200.6	3762.59	10516.6	4142.54	16572.8	7515.55	33246.6	5466.76	8166.59	4184.71	32972.4	12103	13694.6	64400.9	16672	10909.8	8068.04	9753.37	7763.5
met_484	380.034	0.625	21.509	169.34	Unknown	Unknown	85302.5	77625.8	74065.7	88907.7	48793.4	84519.4	167081	139437	176364	95709.6	130567	180712	157570	159972	130201	112576	96049.4	170592	100762	171673	79887	212830	120745	228600	98182.5	94006.8	73154.9	106059	70566	56298.2	143690	121919	143266	93153.2	65185.2	94288.1
met_1832	470.065	0.626	23.915	187.29	Unknown	Unknown	31359.7	30977	15675.3	36982	37108.2	20723.2	67140.3	25126.9	22774.6	25028.9	33112.3	41866.1	26063	44129.4	23317.3	30476.5	19068.2	46522.3	17521.9	32140.8	32471.7	28214.5	33506.1	36632.2	18673.7	26031.1	19453.1	36415.9	26389.1	25639.6	12252.5	24823.3	27408.1	24450.6	32407.6	21928.7
met_1856	477.976	0.626	25.417	199.09	Unknown	Unknown	35194.5	23652.5	31639.7	25919.8	12893.4	9461.34	20322.7	46705	17752.4	38086.2	35402.7	26208.7	31367.9	37412.5	47159.2	31442	29082.6	21850.2	34563.2	31387.6	21081.9	33389.1	42432.6	44871.5	30894.9	23293.3	29835.9	7632.71	30760.1	24170.7	14537.3	29929	30354.6	28174.7	20878.8	33679.3
met_325	201.038	0.626	22.953	186.3	Unknown	Unknown	186184	150195	163963	122059	59867.8	82935.5	12661.7	215981	221587	240118	219038	304561	311920	263386	278988	206163	173152	189645	18098	17183.6	209218	330182	283571	364401	183257	118660	208621	139643	171295	117348	204797	271705	280016	169082	150808	204388
met_3632	455.1	0.626	24.522	192.27	Unknown	Unknown	7461.79	6467.74	6604.47	5714.54	9467.05	10370.7	18608	8904.11	23292.6	4176.85	12822.4	17457.3	17646.7	13350.4	15195.7	9112.08	4727.26	10164.1	9217.41	20563.7	5811.52	24232.5	14095	24826.6	7132.62	7846.02	6896.31	9931.45	10348.2	10425.5	19939.1	18133.3	13968	9633.19	7144.59	9494.54
met_394	492.047	0.628	24.687	193.16	Unknown	Unknown	98965.7	107742	160561	237300	209250	152909	154944	129213	266956	164055	149044	181787	254576	163939	132026	114035	133880	188192	150481	168250	107153	170948	193179	175850	180789	92806.9	133776	70936.1	158578	151564	122878	151497	148174	148393	85912.3	141016
met_447	201.038	0.628	23.837	193.58	Unknown	Unknown	189388	126383	147745	136309	116658	61054.6	198873	249190	217860	289882	203989	209259	232679	233578	360759	213079	165323	208887	324373	295626	333506	317134	319065	346731	176958	4550.73	200576	139403	164346	134228	211798	303302	292853	191853	181604	250023
met_549	425.984	0.628	22.791	178.9	Unknown	Unknown	126654	87968.8	107628	63180.8	61627.4	71382.9	85720.3	106914	81428.3	132046	98222.2	89353.8	122459	123270	158392	127421	111416	120852	126595	154515	100175	159163	134744	169105	110826	84904.6	120961	60672.8	80703.4	72308.1	101479	159328	140427	103111	76996	117207
met_1978	237.091	0.629	21.585	173.44	Unknown	Unknown	36208.2	21861.5	53235	10505.4	29823.7	13457.2	19551.1	9223.04	24895.2	45260.2	11610.2	19532.6	9368.9	5258.24	37534.1	24177.5	6371.31	10456.9	49749.2	27585.2	26006.3	12165.7	8288.2	22838.7	44486.8	13271.8	41691.5	19029.1	22274.6	28454.9	3815.24	65311.9	9760.43	8019.99	29210.2	36393.2
met_25	349.104	0.63	21.713	171.49	Unknown	Unknown	2809330	1913731	2846617	2.03957e+06	1633205	1869033	1797372	2919900	2083035	3455717	3808100	3113173	2400436	3317353	3935914	3149560	2982758	2329958	4180770	4765662	3604378	4215367	4410361	3269488	3070199	1853757	3080626	2.61652e+06	2.69199e+06	2309367	672289	3945520	3135965	16200.4	3224076	3765544
met_2995	344.988	0.63	22.424	177.25	Unknown	Unknown	10913.2	10100	10285.7	4054.07	9746.64	10740	29032.4	14966	22435.9	13178.8	4777.82	23507.8	24782.4	16106	20449.3	16139.2	12320.7	16473.1	12166.9	21106.5	9541.89	33146.7	22632.4	33402.5	9463.69	12382.4	10182.3	12040.4	7740.62	8173.83	18502.6	23034.2	20581.1	9251.46	6529.44	14728.5
met_8039	343.98	0.631	24.892	197.02	Unknown	Unknown	4941.56	5319.32	5356.68	5310.67	5109.44	5722.26	7636.27	1801.08	8727.56	7057.87	11780.3	3070.19	8246.69	5661.22	7914.84	9834.84	8127.87	2945.51	7392.28	4875.67	5976.02	6779.48	4553.35	2737.07	3280.41	4911.75	6686.99	6949.76	4125.83	8650.31	5003.15	1838.63	7054.28	6272.32	3891.2	6579.02
met_4361	381.041	0.633	24	189.15	Unknown	Unknown	23319.6	23416.1	15959.4	24697.3	4548.57	97656.1	7345.8	117850	10684.9	122429	114960	114850	62004.5	51878.7	4651.76	102079	22837.7	97240.8	141025	142363	142498	143568	112104	140749	172799	27470.7	20950.8	79863.6	103446	11404.7	145414	156024	144376	157032	145810	154750
met_393	349.105	0.64	23.808	188.25	Unknown	Unknown	286423	159005	229124	185458	226743	189650	193774	160456	169063	134548	190390	147358	311526	154386	161263	183291	314109	205018	110081	174965	205314	162563	142010	41509.5	287079	185566	104740	213709	225266	248434	181553	160814	166740	153399	294575	110642
met_1189	277.024	0.642	19.451	154.87	Unknown	Unknown	25586.2	31339.7	24309.5	41884.1	31586.9	30680.1	101906	39219.4	99202.4	26038.4	47139.9	55022	84677.5	56044.1	47662	34218.2	25817.8	45206	39981.8	57829.5	32338.1	52824.3	42864.7	112525	35517.8	43226.4	30183.7	65180.5	41528.6	30632.5	122146	62138.1	53262.7	41050.1	31783.7	33336.3
met_665	462.037	0.642	23.998	188.04	Unknown	Unknown	88677	98579.3	71085.7	61853.9	66877.5	70756.6	96104.6	114870	54489.4	78386.6	115190	122470	108457	117070	91136.9	102584	88914.2	123216	74381.5	104966	49856.7	125531	99754.9	85752.3	82053.3	74590.8	71064.9	60905.8	67695.4	58270.2	66504.6	118230	101904	77190.6	44967.5	76621.8
met_6766	237.091	0.646	30.243	243.88	Unknown	Unknown	15514.3	25567.3	3056.56	6788.65	5599.32	5496.89	6155.08	2811.38	1949.86	4953.48	4841.44	1009.49	6931.16	6682.29	11188	3007.68	6286.16	4874.09	12805.7	7801.48	8366.8	5545.39	3258.29	6225.45	6060.1	15927.9	7002.69	5655.63	5658.07	5698.12	4198.44	2187.21	5440.71	5996.37	5889.41	861.946
met_60	295.05	0.649	19.418	154.18	Unknown	Unknown	1017574	30125.2	1372849	36117.6	1226323	1667820	32054.2	583731	12688.2	1308434	484964	674010	34443.8	590923	713444	556681	830422	47858.7	1432779	583619	2110579	10918.9	916662	35316.3	815723	37195.4	1544430	32373.7	5070745	1837819	1.12664e+06	632508	584421	6614298	2222692	1477923
met_503	555.13	0.65	26.589	207.58	Unknown	Unknown	106357	81868.2	131737	44310.3	127558	184998	3393.08	53061.4	6527.83	139619	41192.8	102020	106801	117353	54352	47181.6	88005.3	4777.46	156173	49132.6	243146	159322	92454.2	116255	77898.9	67891.5	158333	55505.8	718912	179771	5196.73	134964	60916.6	802448	263050	162622
met_2051	202.965	0.669	20.914	169.46	Unknown	Unknown	24712.4	43651.8	24029.2	23211.5	34779.4	28961.9	39989.5	26969	37117.9	17719.2	38473.2	14974.2	29811.4	18045.1	30255.4	39234.8	38608.8	16246.4	27504.8	21513	22075.4	15865.2	26801.4	14790.2	27361.9	48996.8	23311.7	26981.7	29347.1	14527.9	15282	34187.7	30175	26565.2	25165	22589.5
met_6918	485.026	0.672	25.62	200.61	Unknown	Unknown	11404.7	14307.3	140098	78654.1	89297.1	97656.1	110198	9553.06	115293	122429	15236.7	12930	6123.65	14344	166492	10721	4417.65	5102.61	141025	142363	142498	3141.16	112104	5533.82	9608.67	7750.42	2905.67	79863.6	103446	106961	145414	12934.4	14240.5	157032	145810	3849.56
met_193	297.047	0.673	19.429	154.2	Unknown	Unknown	389338	262347	513111	4548.78	464232	644867	10632.3	449741	9288.93	489920	431417	380568	6893.69	321762	410550	5596.09	311650	285725	554045	210276	814327	484966	356452	404396	308230	4182.95	561876	154608	845956	701018	640699	716244	738235	2567667	858105	557024
met_1521	351.031	0.679	20.695	163.31	Unknown	Unknown	26680.1	46815	20289.3	49630.9	42745.5	23788	16171.3	33851.9	60004.9	16617.3	40387.8	26918.3	62411.8	46253.1	26332.6	55475.1	47853.7	55901.9	10515.9	22884.3	3750.74	19480	18151.2	18061.8	31293.5	39019.1	13115.3	36499.8	31450.5	13887.4	20829.1	40218.8	35154.8	16986.2	6960.53	10878.7
met_366	345.079	0.68	21.79	172.18	Unknown	Unknown	131700	176232	184845	69318.9	159704	148434	91434.3	177815	169844	144643	201263	175075	166292	219764	191444	192031	203130	152414	133080	200588	111863	208036	213281	143949	163479	177942	144372	166056	103608	125952	153583	202118	171231	66086.4	122312	149484
met_576	367.061	0.683	21.478	169.3	Unknown	Unknown	87383.8	124570	110642	40807.2	104265	97863.8	42850.1	109758	56824.6	111306	128039	90076.2	96166.2	120551	109464	126721	137268	93566.9	99167.8	132621	82099	109279	123894	78212.6	132681	90666.7	91793.1	103824	65717.8	90159	96664.4	126089	107485	10468.9	85486.2	114663
met_465	410.045	0.694	22.307	175.26	Unknown	Unknown	114854	271219	101944	303810	141826	110882	181094	113863	205119	12495.6	133519	186107	186150	154253	91145.8	145205	157546	128220	126073	147142	9789.29	121624	143249	144108	94199.7	255672	123160	191687	184643	150700	120566	133145	104081	146215	150314	143284
met_504	399.123	0.698	24.388	191.98	Unknown	Unknown	499898	704342	346521	78654.1	89297.1	97656.1	110198	117850	115293	122429	114960	114850	210696	202058	349708	102079	100445	97240.8	141025	142363	142498	143568	112104	140749	582094	617194	338911	79863.6	103446	106961	145414	156024	144376	157032	145810	154750
met_45	980.016	0.701	32.12	248.55	Unknown	Unknown	1783373	1.40044e+06	1605507	2862108	343897	3681936	2966536	399711	3736549	1783871	2002317	3354738	3642317	2579163	2079322	2080614	1899121	3407084	1.31979e+06	1915441	1.44887e+06	2491447	1.20124e+06	2668715	1872964	1.81766e+06	1407544	1.75332e+06	1.30471e+06	1.61257e+06	2.29058e+06	1.93931e+06	1868244	1.60422e+06	1.83071e+06	1373818
met_6010	280.105	0.703	21.613	172.25	Unknown	Unknown	136689	155509	69014.4	78654.1	89297.1	97656.1	110198	117850	115293	122429	114960	114850	7647.15	15805.6	6852.19	102079	100445	97240.8	141025	142363	142498	143568	112104	140749	39462.1	42424	10908.7	79863.6	103446	106961	145414	156024	144376	157032	145810	154750
met_6743	237.091	0.704	21.092	169.41	Unknown	Unknown	5843.16	5365.09	5452.23	4425.46	5870.02	5566.37	6306.61	20368	10372	11322.9	11051.1	6503.78	5023.75	10843.1	6675.17	6404.25	11041.3	4921.55	6439.54	5641.71	5056.06	6072.69	4977.88	8754.12	6978	5928.11	6439.89	4228.34	5262.36	4902.83	6207.44	4754.14	3888.1	5216.27	13906.2	5946.91
met_5906	443.958	0.707	22.918	179.7	Unknown	Unknown	10706.4	7120.89	10688.8	8501.52	11515.2	10093.1	7495.41	4423.65	7186.66	4661.94	10423.2	5769.17	7497.59	8819.06	6008.77	8282.82	8401.59	5529.87	9079.84	7029.6	7234.42	5465.25	10247.4	8991.99	9409.38	4977.81	10301.6	7016.13	14236.6	10209.6	9502.87	6983.3	8324.25	6698.98	7101.63	7945.15
met_4338	305.918	0.708	19.218	152.34	Unknown	Unknown	15566.5	7884.83	2396.02	6489.45	12197.4	8555.92	10081.2	8664.04	9573.08	15656.2	10079.6	10341.9	3973.6	8540.46	5387.96	13334.6	8492.96	10437.8	8667.37	7789.65	11284.9	9459.72	8118.68	9695.13	8613.69	7567.7	12386.6	8357.65	37657.9	10061.3	8487.07	10856.2	8074.86	81313.3	11701.1	11602.4
met_3364	419.914	0.723	21.688	170.24	Unknown	Unknown	14486.1	13665.6	18323.6	13706.3	13969.9	22290	10196.5	10598.1	16640.7	17332.7	16792.6	12203.6	14169.9	15704.2	12425.5	10751.1	11997.7	20178.1	17501	10302.1	20633	15359.9	13967.9	14454.2	11458.4	13760.7	16500.1	14876	27139.6	18737.1	14632.7	8574.51	18513	27420.6	18984.7	19463.9
met_4168	386	0.73	21.615	170.1	Unknown	Unknown	11113.3	14296.9	12759.7	8840.86	12284.5	10144.5	6247.06	9803.92	5564.65	11939.7	9997.26	13528.4	6648.43	12631	7062.93	9085.25	15697.3	13279.8	7872.02	7839.45	5676.93	10365.5	9534.06	6642.53	13878.5	11642.3	10581.8	5133.33	13590.6	5943.6	5065.25	9435	7710.48	4183.23	10963.8	7218
met_5283	357.112	0.744	22.353	176.47	Unknown	Unknown	23696.8	47782.2	24450.7	78654.1	89297.1	97656.1	110198	117850	115293	122429	114960	114850	20990.7	17522.5	18598.2	102079	100445	97240.8	141025	142363	142498	143568	112104	140749	28183.8	41114.4	28544	79863.6	103446	106961	145414	156024	144376	157032	145810	154750
met_414	297.047	0.776	19.431	154.24	Unknown	Unknown	143220	158091	159519	14250.3	189876	175299	2472.16	351490	65649.5	146124	153630	101999	41957.4	201204	147907	366729	187829	7528.25	185515	145942	170976	173448	142834	56022.1	127205	97213.2	164971	4046.44	267580	165605	4019.3	239718	144581	439247	206349	160524
met_1753	399.929	0.789	22.326	175.57	Unknown	Unknown	30274.9	30772.8	33891.8	4313.74	23998.3	33729	21925.1	49310.6	10540.1	25820.8	40626.2	20488.2	12278.6	29059.7	40306.9	47063.8	27098.2	21745.5	28147.5	24902	41087.7	34341.4	31609.5	10996.5	23420.7	13994.1	27442.1	3726.27	40909.3	24715.7	23554	37472.2	42561.3	33826.7	25081.9	31158.5
met_1895	397.932	0.794	22.311	175.47	Unknown	Unknown	28963.8	30417.5	33178.8	3863.03	16854.7	28976	7245.27	52440.5	7771.32	31988.2	41637.5	20822.2	13488.9	30808.7	21033.5	15941.1	18874.9	19940.2	20051.9	35592.4	36193.9	33997.6	26453.4	12583.6	28579.6	18984.2	29899.2	14880.9	30910.4	24437.4	5047.49	39806.9	42274.8	38786.2	25539.6	31394.7
met_4916	462.663	0.803	22.69	177.66	Unknown	Unknown	136689	20254.5	140098	78654.1	89297.1	97656.1	110198	117850	115293	122429	24888.3	20062.7	200928	174561	166492	102079	5773.66	25285.6	5867.56	142363	142498	27762	15713.5	140749	172799	201159	23310	79863.6	103446	7105.99	145414	18588.7	144376	15672.3	17828.3	7793.32
met_8214	366.959	0.847	20.637	162.6	Unknown	Unknown	5341.92	4632.36	4722.05	5723.21	5484.9	7709.06	5481.37	7048.85	1689.81	8399.6	5745.64	2835.71	25002.4	5717.16	6446.09	5379.59	4629.28	6629.21	6349.78	4805.55	3945.81	5532.9	3230.14	6515.32	7825.49	6170.24	4904.04	6398.49	3948.28	3519.76	4118.48	4451.54	6053.31	6653.44	4691.45	5421.69
met_3742	411.652	0.876	20.519	161.01	Unknown	Unknown	8772.17	17287.2	16346.5	12944.5	14830	14344	14949	17160.9	20192.4	12561.2	16694.4	19614.6	19326.8	15343.2	14558.1	13048.9	11101.8	12336.6	14745.9	15873.1	14320	18328.8	14573.7	23014.6	16327.8	19967.1	10728.1	14844.4	14541.9	9393.45	19390.5	16444.7	14129.2	15509.6	15421.3	15102.6
met_3369	414.61	0.878	19.788	155.17	Unknown	Unknown	14543.6	12087.5	15263.1	18930.4	18357.3	17222.4	12321	14761.6	32331.3	12531	18190.1	20765.9	22304	19376.1	13712.5	26701.2	19434.3	36836.5	18985.5	20754	20908.1	17372.5	19525.5	28567	17163.7	18726.4	17529.8	20876.9	22038.4	20538.2	24909.4	13314.7	12968.5	18527	19392.8	20878.8
met_2	955.972	0.881	31.365	242.76	Unknown	Unknown	8322333	6357307	8829646	4166350	1.140958E7	1.135533E7	5645333	9047146	3479826	1.06156E7	8592205	4233147	5465217	6390673	7742944	8149293	1.04497E7	6270129	1.209403E7	8895248	1.21048E7	7762001	8951956	3711388	7374405	5443776	1.115517E7	1550168	8243231	1.242612E7	3677834	7881384	8530358	1.356534E7	1.138468E7	1.01138E7
met_7504	350.798	0.881	19.256	151.82	Unknown	Unknown	5432.63	6977.2	7167.22	5331.83	3834.01	7493.7	5226.51	4596.4	7272.58	10543.2	8600.68	12177.5	5728.57	5940.3	7795.17	7049.19	5085.59	8216.28	9560.35	11138.9	2626.48	6357.97	5201.79	6614.73	6492.03	8441.66	4853.32	7209.78	2705.52	5192.2	5450.38	7094.92	8159.8	5963.2	2621.38	9579.64
met_28	957.97	0.893	31.374	242.82	Unknown	Unknown	3140461	1764753	3110237	2.03957e+06	2.03581e+06	4540367	2.2001e+06	3053357	2102346	4009093	2902524	1669861	1839516	1024855	4.34032e+06	828850	3463640	1601122	4315067	3132793	4339893	308595	3040819	2062561	2834834	2148255	4135015	757471	3144063	4501220	1331700	2156234	2579991	2.57307e+06	1700511	3.10898e+06
met_6298	417.642	0.908	20.533	161.06	Unknown	Unknown	4392.04	6569.18	6576.11	6868.11	4021.54	5013.84	6022.5	3498.43	5848.26	5007.23	4050.72	4882.84	6623.18	6284.63	7059.24	5142.85	2728.69	7491.06	6438.69	4317.76	4621.37	7920.98	5373.39	6655.5	4259.71	2989.79	4696.5	5042.21	5287.03	5976.58	6531.57	9062.4	6325.29	2454.16	7318.62	5896.65
met_1984	397.932	0.916	22.303	175.41	Unknown	Unknown	30168.8	25835	27866.8	21880.2	33393.3	35760.4	16028	19426	17364.2	19364.7	24771.2	22216.3	18456.2	22416.6	26897.8	34781.7	42382.1	22315.6	34802.1	19525	26018.6	20732.5	26039.1	21896.8	32792.5	26324.9	23060.5	31506	28463.2	29492.3	20570.5	27374.9	20542.9	43221.5	30420.1	11608.2
met_1736	466.656	0.919	22.701	177.73	Unknown	Unknown	43591.1	17401.2	81659.2	16240.8	30133.5	67711.5	23651.8	56728.3	44448.4	35906.1	55668.8	23382	43426.4	35673.1	54209	34468.6	32992.9	27054.2	47902.3	66171.1	33571.9	56225.1	33479	57500.8	32391	31228.4	18297.7	31196	15796.9	40964.3	27086.4	40186.1	49060.8	36460.7	36387.9	35344.3
met_410	295.05	0.92	19.421	154.19	Unknown	Unknown	126068	110547	210485	44935.6	233308	157922	68099.2	141659	79423.5	121052	188280	75719.3	73138.3	128975	148337	149967	201016	64845.9	192447	117941	258618	138790	239652	81635.5	156760	120447	190520	29029.4	199438	184081	32488.1	109837	127571	319320	208711	189593
met_72	237.09	0.923	19.602	157.29	Unknown	Unknown	748824	470911	1099385	199189	1210755	1055769	343838	621695	360389	701013	819745	549517	407260	663494	780163	947478	1346061	350795	1326585	788502	881377	555916	1019379	389494	744750	584229	1102066	189131	1878674	909633	171372	748769	754480	2656791	1248114	735226
met_1454	297.047	0.936	19.422	154.16	Unknown	Unknown	49456.2	29759.1	33017.6	14395.8	101984	60367	25120.5	60641.1	39379.9	42336.7	52701.5	37912.6	31518.5	38543.4	56188.3	53232.3	68829.3	31137.1	13342.4	50096.2	12862.6	45577.4	31878.5	27811.8	68717.1	44119.7	43552.8	9249.39	48546.7	21606.7	36598.5	48752.2	62812.9	118389	37400.3	44287.8
met_1436	462.663	0.958	22.695	177.69	Unknown	Unknown	38206.6	18270.7	77021.9	19792.3	95826.2	54008	64226	28175.1	66933.9	68370	44292	24013.1	76081.8	65146	67075.3	87086.4	18935.6	28375.9	21886.3	44819.3	44547.8	52956.9	42096.5	48650.4	49740.2	26988.8	46697.7	31196	17880.5	91627.6	56877.8	65453.5	60430.3	24087.4	40602.9	94377.8
met_4425	415.646	0.971	20.53	161.08	Unknown	Unknown	18631.6	16276.2	15226.4	18792.6	13321.6	25843.1	11684.5	18348	14091.3	13386.2	10149.2	12506.3	9623.66	13320.3	13602.1	17550	12651.1	15000.6	12881.1	12288.6	13752.9	7395.67	16994.8	19489.5	13795.6	8626.56	9903.92	17378.5	13524.2	17661	13554.8	14533.2	15210.7	12922.7	13964.7	11248.8
met_1581	413.649	0.984	20.532	161.1	Unknown	Unknown	30793.6	22771.3	32125.3	26505.3	27001.3	37486.3	50455.1	26165.4	28950.1	43671.2	37519.4	42712.2	39779.9	30705.8	37201	31329.1	22857.5	44591.5	16760.5	32675.7	30956	38696.1	31249.6	24016.9	28960.4	46018.1	54423.1	35983.3	49025.1	25291.6	30642.9	16279.1	30196.8	26938	32218.8	25897
met_289	199.805	1.008	19.659	159.3	Unknown	Unknown	249083	225967	268374	260841	365876	510171	147020	209346	198372	392619	218701	284024	345921	236762	290826	273897	356282	506994	293782	354420	231007	257039	233440	180774	138586	173088	275241	239718	224559	363818	197980	310908	330947	415110	271847	466570
met_680	416.608	1.026	19.788	155.14	Unknown	Unknown	38723	39652.7	102193	105228	80237	219404	71290.8	175234	42368.8	128663	83260.2	107037	86327	42793.5	85036.6	67904.7	143661	151195	28172.8	69634.7	91604	46493.4	72653.9	76073	87211.8	98733.8	65660.2	84626.9	143902	94089.8	67781.6	87894.7	42842.3	88052	103793	63348.6
met_2052	411.652	1.029	20.521	161.06	Unknown	Unknown	19190.5	24326.1	24537	19613.6	27224.1	55224.8	29707.3	70279.9	27204.3	66648.4	24334.4	44240.5	35046.7	33251.8	36565.5	65952.3	32164.1	54406.7	32363.6	19168.4	19284.4	44850.1	16241.5	12145	20732	32910.9	29873.9	27883.6	15674.3	28871.4	29071.4	55638.9	25442.4	31835.9	13263.7	34036.9
met_2360	415.646	1.032	20.531	161.07	Unknown	Unknown	10063.7	22124.2	24793.4	16870.6	31084.9	19252.5	36596.5	21437.1	21693.9	22151.4	12486.5	23583.7	22044.4	21835.4	24876.1	21677.3	15316	21076	22729.5	46772.7	17535.8	20823.8	26308.8	21487.8	19652.2	24513	18515.6	21347.9	28396.7	11030.3	19742	25099.6	22446.9	20372.8	15496.5	14440.5
met_714	418.604	1.044	19.792	155.16	Unknown	Unknown	96772.1	102093	75722.3	89386.8	60562	91868.3	47926.3	148414	63179.4	28285.1	71273.4	111774	82877.4	35873.7	77363.7	81830.9	156202	84725.4	176206	47026.6	201622	115227	156170	126650	74123.6	102850	111130	72268.2	91624.7	55139.3	87042.8	40646	150964	104935	60920.7	58112.8
met_6979	238.094	1.046	19.647	157.62	Unknown	Unknown	6160.51	9877.07	6093.07	4215.21	5345.98	6199.69	4500.56	11017.5	2164.34	7937.46	6377.76	4899.08	7706.25	5518.36	8359.67	13457.9	4047.29	6774.99	13560.8	5702.91	9248.84	7015.98	10377.3	8747.98	7533.16	8657.19	9751.91	7633.11	5983.76	10011.8	4170.02	2972.32	3394.96	6371.87	11214.8	6121.13
met_1629	414.61	1.061	19.783	155.15	Unknown	Unknown	33220.3	22942.4	44146.9	28283.7	28045.3	24001.4	34655.4	31576.1	20035.2	48599.1	60714.1	19520.9	26101.6	36537.8	9638.18	35104.8	64951.6	26958.5	36760.7	32205.7	47231.7	14998.2	64118.8	31751.7	28603.8	25601.2	24169.4	40733.7	18309.2	16671.4	24127.9	15820.1	26279.7	26129.5	47446.3	27956.3
met_7282	328.75	1.067	20.272	160.32	Unknown	Unknown	1449.49	9208.28	6491.82	4323.96	9812.92	5114.47	8543.03	6844.66	8601.18	9034.54	7634.44	6741.23	10036	4248.49	5913.61	4794.7	5438.89	4962.12	5978.36	8100.13	6230.77	7173.09	2347.15	5133.78	3185.56	9645.55	4143.4	8606.72	3584.28	7398.74	4351.06	4097.35	10820.8	6303.89	426.204	6048.05
met_8714	286.039	1.074	19.823	157.65	Unknown	Unknown	7994.67	7132.42	140098	78654.1	89297.1	97656.1	110198	117850	115293	122429	114960	114850	11764.7	12468.4	13101.5	102079	100445	97240.8	141025	142363	142498	143568	112104	140749	19091.5	19020.1	16903	79863.6	103446	106961	145414	156024	144376	157032	145810	154750
met_11886	317	1.117	20.492	162.34	Unknown	Unknown	8982.56	155509	8910.94	78654.1	89297.1	97656.1	110198	117850	115293	122429	114960	114850	3601.89	4544.63	5295.86	102079	100445	97240.8	141025	142363	142498	143568	112104	140749	6867.57	201159	10199.6	79863.6	103446	106961	145414	156024	144376	157032	145810	154750
met_5120	433	1.121	24.851	195.16	Unknown	Unknown	23143	16868.8	30060.8	78654.1	89297.1	97656.1	110198	117850	115293	122429	114960	114850	15344.1	28668.9	21813.7	102079	100445	97240.8	141025	142363	142498	143568	112104	140749	27496.8	15983	31544.8	79863.6	103446	106961	145414	156024	144376	157032	145810	154750
met_172	237.091	1.126	19.602	157.3	Unknown	Unknown	867417	202673	489049	91775.6	798653	926304	182410	701038	258144	1026239	827008	350059	426342	131790	342517	514679	1075145	286564	559459	452167	64699.3	432866	450611	265498	253450	150030	656765	24346.6	1.08787e+06	1663012	482064	420735	753058	822803	767161	1046952
met_675	350.798	1.135	19.259	151.83	Unknown	Unknown	74584.6	57618	65955	149341	69502.2	163331	43613.1	103903	106399	133377	85669.1	88195.6	62217.7	55989.7	46997	46307.7	143951	177164	121109	78571.4	84267.1	78094.8	85167.8	138633	86189	61268.8	76394.2	152834	118235	106961	117105	81603.1	96310.2	90546.1	69943.1	55665.5
met_7159	439.017	1.136	24.545	192.65	Unknown	Unknown	12957.6	8431.56	20491.1	78654.1	89297.1	97656.1	110198	117850	115293	122429	114960	114850	200928	16312.9	11889.2	102079	100445	97240.8	141025	142363	142498	143568	112104	140749	12707.8	19338.9	14657.5	79863.6	103446	106961	145414	156024	144376	157032	145810	154750
met_9490	384.672	1.144	19.621	154.24	Unknown	Unknown	11029	10194.9	9639.58	78654.1	89297.1	97656.1	110198	117850	115293	122429	114960	114850	5872.85	10641.1	12123.2	102079	100445	97240.8	141025	142363	142498	143568	112104	140749	12266.3	11221.1	12441	79863.6	103446	106961	145414	156024	144376	157032	145810	154750
met_1383	659.066	1.145	30.719	239.21	Unknown	Unknown	103657	156195	83249.9	78654.1	89297.1	97656.1	110198	117850	115293	122429	114960	114850	202716	61518.2	92945.3	102079	100445	97240.8	141025	142363	142498	143568	112104	140749	112346	230866	102229	79863.6	103446	106961	145414	156024	144376	157032	145810	154750
met_10210	236.993	1.146	24.471	196.89	Unknown	Unknown	8188.91	4162.85	12512.7	78654.1	89297.1	97656.1	110198	117850	115293	122429	114960	114850	3282.71	8460.5	6456.74	102079	100445	97240.8	141025	142363	142498	143568	112104	140749	10143.4	7812.02	171479	79863.6	103446	106961	145414	156024	144376	157032	145810	154750
met_1031	539.044	1.146	27.298	213.3	Unknown	Unknown	118933	238814	110787	78654.1	89297.1	97656.1	110198	117850	115293	122429	114960	114850	313607	67979.4	112881	102079	100445	97240.8	141025	142363	142498	143568	112104	140749	138795	376499	126390	79863.6	103446	106961	145414	156024	144376	157032	145810	154750
met_1437	441.999	1.146	24.263	190.39	Unknown	Unknown	120678	141223	64216.6	78654.1	89297.1	97656.1	110198	117850	115293	122429	114960	114850	96638	19318.7	116556	102079	100445	97240.8	141025	142363	142498	143568	112104	140749	88195.3	176512	114927	79863.6	103446	106961	145414	156024	144376	157032	145810	154750
met_5895	722.909	1.146	31.143	242.14	Unknown	Unknown	5493.66	27038.5	9582.69	78654.1	89297.1	97656.1	110198	117850	115293	122429	114960	114850	60270	174561	166492	102079	100445	97240.8	141025	142363	142498	143568	112104	140749	6780.14	55755.8	7175.92	79863.6	103446	106961	145414	156024	144376	157032	145810	154750
met_7412	377.011	1.146	22.241	175.23	Unknown	Unknown	10830	16909.1	9791.33	78654.1	89297.1	97656.1	110198	117850	115293	122429	114960	114850	24895.6	174561	11003.8	102079	100445	97240.8	141025	142363	142498	143568	112104	140749	11887.1	31747	12088	79863.6	103446	106961	145414	156024	144376	157032	145810	154750
met_8075	543.068	1.146	28.527	222.96	Unknown	Unknown	11749.1	14994.2	11057	78654.1	89297.1	97656.1	110198	117850	115293	122429	114960	114850	8904.79	5299.44	11503.2	102079	100445	97240.8	141025	142363	142498	143568	112104	140749	12927.4	17483.3	15368.9	79863.6	103446	106961	145414	156024	144376	157032	145810	154750
met_8588	632.022	1.146	32.591	254.15	Unknown	Unknown	5232.85	15745.8	5010.46	78654.1	89297.1	97656.1	110198	117850	115293	122429	114960	114850	23401.9	6752.7	166492	102079	100445	97240.8	141025	142363	142498	143568	112104	140749	7798.72	22240.6	4196.52	79863.6	103446	106961	145414	156024	144376	157032	145810	154750
met_107	219.855	1.147	19.875	160.17	Unknown	Unknown	1138885	3408815	1017307	78654.1	89297.1	97656.1	110198	117850	115293	122429	114960	114850	3293402	1569730	1152869	102079	100445	97240.8	141025	142363	142498	24616.3	3578.84	10658.2	1375153	3942891	1273620	79863.6	103446	106961	5512.52	156024	144376	157032	145810	154750
met_1294	261.889	1.147	21.075	168.43	Unknown	Unknown	90839.1	172388	55199.1	78654.1	89297.1	97656.1	110198	117850	115293	122429	114960	114850	318208	65193.1	76946.6	102079	100445	97240.8	141025	142363	142498	143568	112104	140749	75872.7	224017	82336.1	79863.6	103446	106961	145414	156024	144376	157032	145810	154750
met_1704	779.09	1.147	33.902	263.39	Unknown	Unknown	87753.4	86593.3	102329	78654.1	89297.1	97656.1	110198	117850	115293	122429	114960	114850	120020	56819.3	77758.8	102079	100445	97240.8	141025	142363	142498	143568	112104	140749	104731	113788	119564	79863.6	103446	106961	145414	156024	144376	157032	145810	154750
met_983	583.083	1.147	28.825	224.93	Unknown	Unknown	208340	161285	219638	78654.1	89297.1	97656.1	110198	117850	115293	122429	114960	114850	196975	105297	174459	102079	100445	97240.8	141025	142363	142498	143568	112104	140749	225813	201159	246501	79863.6	103446	106961	145414	156024	144376	157032	145810	154750
met_115	221.852	1.148	19.879	160.12	Unknown	Unknown	1039127	3096709	916491	78654.1	89297.1	97656.1	110198	117850	115293	122429	114960	114850	2999609	1452425	1066232	102079	100445	97240.8	141025	142363	142498	22575.3	112104	9194.57	1291436	3616141	1182773	79863.6	103446	106961	4098	156024	144376	157032	145810	154750
met_1747	217.86	1.148	19.886	160.35	Unknown	Unknown	54933.4	168477	51321.3	78654.1	89297.1	97656.1	110198	117850	115293	122429	114960	114850	161474	42259.5	66969.6	102079	100445	97240.8	141025	142363	142498	143568	112104	140749	65705.4	149763	60016.6	79863.6	103446	106961	145414	156024	144376	157032	145810	154750
met_2934	720.91	1.148	31.157	242.22	Unknown	Unknown	136689	59112.7	6731.26	78654.1	89297.1	97656.1	110198	117850	115293	122429	114960	114850	158440	26388.2	166492	102079	100445	97240.8	141025	142363	142498	143568	112104	140749	16439.3	122344	9879.12	79863.6	103446	106961	145414	156024	144376	157032	145810	154750
met_4502	797.063	1.148	33.395	259.32	Unknown	Unknown	27138.6	42580.2	22583.9	78654.1	89297.1	97656.1	110198	117850	115293	122429	114960	114850	37400.7	19496.9	28468.8	102079	100445	97240.8	141025	142363	142498	143568	112104	140749	27939.2	47849.2	28591.5	79863.6	103446	106961	145414	156024	144376	157032	145810	154750
met_4565	341.045	1.148	21.678	171.38	Unknown	Unknown	19308.7	27979.6	24084.9	78654.1	89297.1	97656.1	110198	117850	115293	122429	114960	114850	39218.2	17313.3	31120.2	102079	100445	97240.8	141025	142363	142498	1992.13	112104	4078.79	22822	45594.4	27558.5	79863.6	103446	106961	15629.9	156024	144376	157032	145810	154750
met_4931	663.09	1.148	31.937	248.76	Unknown	Unknown	25991.7	24283.5	24488	78654.1	89297.1	97656.1	110198	117850	115293	122429	114960	114850	27428.9	12943.4	28254.4	102079	100445	97240.8	141025	142363	142498	143568	112104	140749	27053	34006.2	32061.1	79863.6	103446	106961	145414	156024	144376	157032	145810	154750
met_5200	421.052	1.148	24.065	189.08	Unknown	Unknown	30086	25282.6	12358.4	78654.1	89297.1	97656.1	110198	117850	115293	122429	114960	114850	36127.4	174561	17058.9	102079	100445	97240.8	141025	142363	142498	143568	112104	140749	18883.3	41837.6	23245.9	79863.6	103446	106961	145414	156024	144376	157032	145810	154750
met_7131	463.979	1.148	24.729	193.81	Unknown	Unknown	11396.7	23418.8	11800.7	78654.1	89297.1	97656.1	110198	117850	115293	122429	114960	114850	25214.8	174561	9822.88	102079	100445	97240.8	141025	142363	142498	143568	112104	140749	12084.2	30085.6	9589.32	79863.6	103446	106961	145414	156024	144376	157032	145810	154750
met_1726	245.897	1.149	21.038	168.65	Unknown	Unknown	58011.4	120537	49042.1	78654.1	89297.1	97656.1	110198	117850	115293	122429	114960	114850	145084	33676.9	42449.6	102079	100445	97240.8	141025	142363	142498	143568	112104	140749	64829.8	195806	50106.1	79863.6	103446	106961	145414	156024	144376	157032	145810	154750
met_1846	263.886	1.149	21.083	168.44	Unknown	Unknown	38733.5	109768	35129.6	78654.1	89297.1	97656.1	110198	117850	115293	122429	114960	114850	199902	38132.5	53948	102079	100445	97240.8	141025	142363	142498	143568	112104	140749	55743.3	155112	48300.4	79863.6	103446	106961	145414	156024	144376	157032	145810	154750
met_275	263.886	1.149	19.599	156.42	Unknown	Unknown	319965	826117	380568	78654.1	89297.1	97656.1	110198	117850	115293	122429	114960	114850	1653394	307999	359492	102079	100445	97240.8	141025	142363	142498	18143.3	4049.4	10568.3	388995	1212479	373104	79863.6	103446	106961	7554.68	156024	144376	157032	145810	154750
met_4360	499.029	1.149	25.78	201.74	Unknown	Unknown	24701.2	55368.6	12891.6	78654.1	89297.1	97656.1	110198	117850	115293	122429	114960	114850	66414.9	21744	12779.9	102079	100445	97240.8	141025	142363	142498	143568	112104	140749	25481.9	69551.1	171479	79863.6	103446	106961	145414	156024	144376	157032	145810	154750
met_4376	381.058	1.149	28.632	226.11	Unknown	Unknown	43250.6	34301.8	29089.4	78654.1	89297.1	97656.1	110198	117850	115293	122429	114960	114850	31064.8	174561	26612.1	102079	100445	97240.8	141025	142363	142498	143568	112104	140749	27053.2	40773.1	39028.3	79863.6	103446	106961	145414	156024	144376	157032	145810	154750
met_4659	864.976	1.149	34.812	270.04	Unknown	Unknown	9202.29	46532.8	140098	78654.1	89297.1	97656.1	110198	117850	115293	122429	114960	114850	87597.9	11153.8	4844.16	102079	100445	97240.8	141025	142363	142498	143568	112104	140749	5294.87	73435.1	171479	79863.6	103446	106961	145414	156024	144376	157032	145810	154750
met_1208	597.036	1.15	29.379	229.17	Unknown	Unknown	111159	212626	87674.8	78654.1	89297.1	97656.1	110198	117850	115293	122429	114960	114850	287041	79579.4	115703	102079	100445	97240.8	141025	142363	142498	143568	112104	140749	118299	261195	101812	79863.6	103446	106961	145414	156024	144376	157032	145810	154750
met_150	485.939	1.15	25.03	195.93	Unknown	Unknown	1072912	1738644	1010898	78654.1	89297.1	97656.1	110198	117850	115293	122429	114960	114850	2110234	588524	1126265	102079	100445	97240.8	141025	142363	142498	143568	112104	140749	1237936	2689524	1115631	79863.6	103446	106961	145414	156024	144376	157032	145810	154750
met_1599	481.946	1.15	25.029	195.98	Unknown	Unknown	87015.6	110218	83999	78654.1	89297.1	97656.1	110198	117850	115293	122429	114960	114850	152518	53972.3	64384.1	102079	100445	97240.8	141025	142363	142498	143568	112104	140749	90965.9	182860	86522.6	79863.6	103446	106961	145414	156024	144376	157032	145810	154750
met_2948	225.847	1.15	19.913	160.25	Unknown	Unknown	35279	57409.4	28432.9	78654.1	89297.1	97656.1	110198	117850	115293	122429	114960	114850	88366.6	36048.5	32731.3	102079	100445	97240.8	141025	142363	142498	143568	112104	140749	32783.7	102866	32344.5	79863.6	103446	106961	145414	156024	144376	157032	145810	154750
met_3195	862.976	1.15	34.966	271.27	Unknown	Unknown	7392.83	42058.6	4834.83	78654.1	89297.1	97656.1	110198	117850	115293	122429	114960	114850	150232	20326	2864.17	102079	100445	97240.8	141025	142363	142498	143568	112104	140749	11198.4	105402	4270.88	79863.6	103446	106961	145414	156024	144376	157032	145810	154750
met_3208	457.044	1.15	29.723	233.49	Unknown	Unknown	31628.8	54228.8	41730.5	78654.1	89297.1	97656.1	110198	117850	115293	122429	114960	114850	54113.7	40670.6	40018.7	102079	100445	97240.8	141025	142363	142498	143568	112104	140749	49699.9	65637.2	43557.4	79863.6	103446	106961	145414	156024	144376	157032	145810	154750
met_3366	419.055	1.15	24.154	189.82	Unknown	Unknown	30810.9	49002.9	47828.2	78654.1	89297.1	97656.1	110198	117850	115293	122429	114960	114850	200928	43379.7	46040.5	102079	100445	97240.8	141025	142363	142498	143568	112104	140749	35596.9	201159	53648.2	79863.6	103446	106961	145414	156024	144376	157032	145810	154750
met_3525	592.042	1.15	29.595	230.93	Unknown	Unknown	20098.1	155509	16670	78654.1	89297.1	97656.1	110198	117850	115293	122429	114960	114850	84926.7	174561	26986.3	102079	100445	97240.8	141025	142363	142498	143568	112104	140749	21381.2	102277	18558.5	79863.6	103446	106961	145414	156024	144376	157032	145810	154750
met_5241	546.024	1.15	27.944	218.34	Unknown	Unknown	28611.6	41398.3	29129.5	78654.1	89297.1	97656.1	110198	117850	115293	122429	114960	114850	200928	23845.9	40582.2	102079	100445	97240.8	141025	142363	142498	143568	112104	140749	30766.6	201159	23881.4	79863.6	103446	106961	145414	156024	144376	157032	145810	154750
met_681	321.91	1.15	19.557	154.73	Unknown	Unknown	154729	252105	119754	78654.1	89297.1	97656.1	110198	117850	115293	122429	114960	114850	413698	119223	159570	102079	100445	97240.8	141025	142363	142498	12185	112104	6609.05	127520	435904	119690	79863.6	103446	106961	3817.68	156024	144376	157032	145810	154750
met_943	623.098	1.15	30.227	235.62	Unknown	Unknown	149850	197836	149063	78654.1	89297.1	97656.1	110198	117850	115293	122429	114960	114850	240773	132106	156185	102079	100445	97240.8	141025	142363	142498	143568	112104	140749	170388	264600	158008	79863.6	103446	106961	145414	156024	144376	157032	145810	154750
met_97	483.941	1.15	25.022	195.88	Unknown	Unknown	1638834	2417827	1556325	78654.1	89297.1	97656.1	110198	117850	115293	122429	114960	114850	3127496	1021381	1565064	102079	100445	97240.8	141025	142363	142498	143568	112104	140749	1632118	3822013	1861992	79863.6	103446	106961	145414	156024	144376	157032	145810	154750
met_1466	576.843	1.151	26.435	206.16	Unknown	Unknown	22545.8	134090	140098	78654.1	89297.1	97656.1	110198	117850	115293	122429	114960	114850	388954	60028.7	21934.5	102079	100445	97240.8	141025	142363	142498	143568	112104	140749	23536.2	326844	171479	79863.6	103446	106961	145414	156024	144376	157032	145810	154750
met_1620	734.054	1.151	32.643	253.8	Unknown	Unknown	54837.4	128970	37783.5	78654.1	89297.1	97656.1	110198	117850	115293	122429	114960	114850	172791	47155.6	54988.3	102079	100445	97240.8	141025	142363	142498	143568	112104	140749	57383.8	166277	37514.1	79863.6	103446	106961	145414	156024	144376	157032	145810	154750
met_173	261.889	1.151	19.612	156.59	Unknown	Unknown	648897	1303128	582865	78654.1	89297.1	97656.1	110198	117850	115293	122429	114960	114850	2595049	554995	599100	102079	100445	97240.8	141025	142363	142498	29716.7	8610.33	12654.1	748634	3054972	656506	79863.6	103446	106961	9527.92	156024	144376	157032	145810	154750
met_2241	718.91	1.151	31.169	242.34	Unknown	Unknown	5637.87	68430	9892.96	78654.1	89297.1	97656.1	110198	117850	115293	122429	114960	114850	212134	174561	13474.6	102079	100445	97240.8	141025	142363	142498	143568	112104	140749	14237.3	144185	9469.84	79863.6	103446	106961	145414	156024	144376	157032	145810	154750
met_2737	426.004	1.151	24.074	189.08	Unknown	Unknown	54176.3	155509	54213	78654.1	89297.1	97656.1	110198	117850	115293	122429	114960	114850	200928	47467.5	54490.5	102079	100445	97240.8	141025	142363	142498	143568	112104	140749	71729.8	65673.8	53708.6	79863.6	103446	106961	145414	156024	144376	157032	145810	154750
met_3298	201.889	1.151	19.464	157.6	Unknown	Unknown	17934.4	53981.3	22793.9	78654.1	89297.1	97656.1	110198	117850	115293	122429	114960	114850	68145.5	16772.4	25966.5	102079	100445	97240.8	141025	142363	142498	143568	112104	140749	24829.6	90354.1	33155.9	79863.6	103446	106961	145414	156024	144376	157032	145810	154750
met_3357	743.118	1.151	33.43	259.92	Unknown	Unknown	43496.2	44288.6	37940.8	78654.1	89297.1	97656.1	110198	117850	115293	122429	114960	114850	49397.9	27760.9	32892.5	102079	100445	97240.8	141025	142363	142498	143568	112104	140749	40546.5	71537.3	44813.2	79863.6	103446	106961	145414	156024	144376	157032	145810	154750
met_4240	335.925	1.151	20.325	160.61	Unknown	Unknown	10968.4	34907.3	11697.3	78654.1	89297.1	97656.1	110198	117850	115293	122429	114960	114850	61674.2	16437.5	12755.2	102079	100445	97240.8	141025	142363	142498	143568	112104	140749	17960.8	53369.9	15384.3	79863.6	103446	106961	145414	156024	144376	157032	145810	154750
met_561	581.087	1.151	29.033	226.59	Unknown	Unknown	249274	399990	262120	78654.1	89297.1	97656.1	110198	117850	115293	122429	114960	114850	505986	213998	297349	102079	100445	97240.8	141025	142363	142498	143568	112104	140749	262755	439557	277188	79863.6	103446	106961	145414	156024	144376	157032	145810	154750
met_945	323.907	1.151	19.559	154.7	Unknown	Unknown	78560.8	184668	68801.5	78654.1	89297.1	97656.1	110198	117850	115293	122429	114960	114850	433323	63984.2	89376.9	102079	100445	97240.8	141025	142363	142498	13724.5	112104	140749	83097.1	297536	72156.7	79863.6	103446	106961	145414	156024	144376	157032	145810	154750
met_4626	598.889	1.152	27.596	215.1	Unknown	Unknown	4259.58	26021.1	140098	78654.1	89297.1	97656.1	110198	117850	115293	122429	114960	114850	100355	7955.4	166492	102079	100445	97240.8	141025	142363	142498	143568	112104	140749	3736.88	56254.8	2635.98	79863.6	103446	106961	145414	156024	144376	157032	145810	154750
met_4780	403.958	1.152	24.734	194.67	Unknown	Unknown	15390.7	40387.5	18960.8	78654.1	89297.1	97656.1	110198	117850	115293	122429	114960	114850	42837.7	9745.04	24236.7	102079	100445	97240.8	141025	142363	142498	143568	112104	140749	27843.1	39913.2	30184.4	79863.6	103446	106961	145414	156024	144376	157032	145810	154750
met_800	457.045	1.152	25.912	203.25	Unknown	Unknown	166686	279289	198841	78654.1	89297.1	97656.1	110198	117850	115293	122429	114960	114850	319884	198636	171873	102079	100445	97240.8	141025	142363	142498	143568	112104	140749	208365	244358	193507	79863.6	103446	106961	145414	156024	144376	157032	145810	154750
met_8892	397.031	1.152	24.602	193.7	Unknown	Unknown	8550.89	14372.8	13430.8	78654.1	89297.1	97656.1	110198	117850	115293	122429	114960	114850	9663.88	10267.4	6417.79	102079	100445	97240.8	141025	142363	142498	143568	112104	140749	10069.2	8993.49	5065.88	79863.6	103446	106961	145414	156024	144376	157032	145810	154750
met_10292	281.024	1.153	25.405	202.81	Unknown	Unknown	2524.02	6844.98	6401.77	78654.1	89297.1	97656.1	110198	117850	115293	122429	114960	114850	6341.69	5641.81	8147.11	102079	100445	97240.8	141025	142363	142498	143568	112104	140749	5092.94	10696.3	7482.41	79863.6	103446	106961	145414	156024	144376	157032	145810	154750
met_1766	626.011	1.153	29.357	228.78	Unknown	Unknown	92608.5	106777	70292.5	78654.1	89297.1	97656.1	110198	117850	115293	122429	114960	114850	94019.2	54472.3	110139	102079	100445	97240.8	141025	142363	142498	143568	112104	140749	82557.3	162367	87112.3	79863.6	103446	106961	145414	156024	144376	157032	145810	154750
met_3081	591.042	1.153	29.511	230.27	Unknown	Unknown	20943.7	52286.8	19248.7	78654.1	89297.1	97656.1	110198	117850	115293	122429	114960	114850	112061	38892.6	17515.1	102079	100445	97240.8	141025	142363	142498	143568	112104	140749	26260.8	84809.2	14132.5	79863.6	103446	106961	145414	156024	144376	157032	145810	154750
met_4009	479.991	1.153	25.295	198.09	Unknown	Unknown	136689	62963	27257.7	78654.1	89297.1	97656.1	110198	117850	115293	122429	114960	114850	200928	31560.5	35014.8	102079	100445	97240.8	141025	142363	142498	143568	112104	140749	29777.2	60374	19839.5	79863.6	103446	106961	145414	156024	144376	157032	145810	154750
met_4018	521.066	1.153	28.997	226.92	Unknown	Unknown	136689	37434.3	28177.5	78654.1	89297.1	97656.1	110198	117850	115293	122429	114960	114850	51238.5	14299.1	32565	102079	100445	97240.8	141025	142363	142498	143568	112104	140749	35129.6	69857.6	33699.9	79863.6	103446	106961	145414	156024	144376	157032	145810	154750
met_4320	447.976	1.153	24.617	193.12	Unknown	Unknown	17173.9	35497.3	13872.4	78654.1	89297.1	97656.1	110198	117850	115293	122429	114960	114850	71943.2	20529.2	24940.7	102079	100445	97240.8	141025	142363	142498	143568	112104	140749	16238.1	53420	19290.3	79863.6	103446	106961	145414	156024	144376	157032	145810	154750
met_9932	365.917	1.153	24.963	197.17	Unknown	Unknown	3688.3	13710.7	3316.2	78654.1	89297.1	97656.1	110198	117850	115293	122429	114960	114850	19278.8	174561	7015.44	102079	100445	97240.8	141025	142363	142498	143568	112104	140749	4686.12	18233.3	5481.66	79863.6	103446	106961	145414	156024	144376	157032	145810	154750
met_1398	650.056	1.154	30.246	235.56	Unknown	Unknown	107710	250209	101691	78654.1	89297.1	97656.1	110198	117850	115293	122429	114960	114850	200928	165005	139162	102079	100445	97240.8	141025	142363	142498	143568	112104	140749	136714	201159	91745.8	79863.6	103446	106961	145414	156024	144376	157032	145810	154750
met_4131	529.991	1.154	31.697	248.13	Unknown	Unknown	25570.6	57531.4	22201.8	78654.1	89297.1	97656.1	110198	117850	115293	122429	114960	114850	59749.4	22226.7	35375.1	102079	100445	97240.8	141025	142363	142498	143568	112104	140749	30866.6	52781.3	18166.8	79863.6	103446	106961	145414	156024	144376	157032	145810	154750
met_6277	752.044	1.154	31.79	247.03	Unknown	Unknown	12696.8	30121.3	15276.1	78654.1	89297.1	97656.1	110198	117850	115293	122429	114960	114850	34022.7	12563.8	12883.6	102079	100445	97240.8	141025	142363	142498	143568	112104	140749	17974.2	29924.2	171479	79863.6	103446	106961	145414	156024	144376	157032	145810	154750
met_6637	600.887	1.154	27.654	215.56	Unknown	Unknown	3560.67	22360.5	2533.31	78654.1	89297.1	97656.1	110198	117850	115293	122429	114960	114850	62552.7	6022.95	2754.24	102079	100445	97240.8	141025	142363	142498	143568	112104	140749	172799	41564.8	3037.65	79863.6	103446	106961	145414	156024	144376	157032	145810	154750
met_1509	505.99	1.155	25.99	203.3	Unknown	Unknown	111900	108745	78450.1	78654.1	89297.1	97656.1	110198	117850	115293	122429	114960	114850	174064	77885.8	93052.6	102079	100445	97240.8	141025	142363	142498	143568	112104	140749	79547.2	195814	79814.9	79863.6	103446	106961	145414	156024	144376	157032	145810	154750
met_539	465.975	1.155	24.716	193.67	Unknown	Unknown	243392	339722	260620	78654.1	89297.1	97656.1	110198	117850	115293	122429	114960	114850	411084	232335	283460	102079	100445	97240.8	141025	142363	142498	143568	112104	140749	384876	597933	193787	79863.6	103446	106961	145414	156024	144376	157032	145810	154750
met_161	577.066	1.156	29.805	232.71	Unknown	Unknown	818810	2407382	844846	78654.1	89297.1	97656.1	110198	117850	115293	122429	114960	114850	2552129	1242431	793404	102079	100445	97240.8	141025	142363	142498	143568	112104	140749	898936	2902649	950669	79863.6	103446	106961	145414	156024	144376	157032	145810	154750
met_6028	285.933	1.156	24.596	196.12	Unknown	Unknown	12869.5	23189.7	11108.4	78654.1	89297.1	97656.1	110198	117850	115293	122429	114960	114850	26155.7	4972.03	17796.8	102079	100445	97240.8	141025	142363	142498	143568	112104	140749	15258.9	41368.4	171479	79863.6	103446	106961	145414	156024	144376	157032	145810	154750
met_2796	795.062	1.157	33.516	260.29	Unknown	Unknown	136689	73001.4	22955.7	78654.1	89297.1	97656.1	110198	117850	115293	122429	114960	114850	122386	20681.5	31389.3	102079	100445	97240.8	141025	142363	142498	143568	112104	140749	34777.7	95810.8	21028	79863.6	103446	106961	145414	156024	144376	157032	145810	154750
met_3300	330.95	1.157	24.365	193.08	Unknown	Unknown	23097	89567.3	18855.1	78654.1	89297.1	97656.1	110198	117850	115293	122429	114960	114850	47627.9	59126.6	29766.3	102079	100445	97240.8	141025	142363	142498	143568	112104	140749	34937.9	53532.5	22438.5	79863.6	103446	106961	145414	156024	144376	157032	145810	154750
met_4371	337.024	1.157	25.813	204.57	Unknown	Unknown	25837.3	51803.2	34811.1	78654.1	89297.1	97656.1	110198	117850	115293	122429	114960	114850	31591.3	27860	31462.5	102079	100445	97240.8	141025	142363	142498	143568	112104	140749	38210.4	43000.1	3437.78	79863.6	103446	106961	145414	156024	144376	157032	145810	154750
met_5551	441.067	1.157	25.462	199.91	Unknown	Unknown	31212.4	19248.1	24974.2	78654.1	89297.1	97656.1	110198	117850	115293	122429	114960	114850	20632.5	20189.1	29219.7	102079	100445	97240.8	141025	142363	142498	143568	112104	140749	172799	34792.9	36692.1	79863.6	103446	106961	145414	156024	144376	157032	145810	154750
met_6629	401.045	1.157	23.819	187.43	Unknown	Unknown	12800.8	19857.1	16191.6	78654.1	89297.1	97656.1	110198	117850	115293	122429	114960	114850	20486.7	174561	11961.2	102079	100445	97240.8	141025	142363	142498	143568	112104	140749	15195.1	27868.6	13712.9	79863.6	103446	106961	145414	156024	144376	157032	145810	154750
met_980	770.077	1.157	33.381	259.37	Unknown	Unknown	74371.9	399087	69845.2	78654.1	89297.1	97656.1	110198	117850	115293	122429	114960	114850	400129	140489	102188	102079	100445	97240.8	141025	142363	142498	143568	112104	140749	105811	350284	68854.5	79863.6	103446	106961	145414	156024	144376	157032	145810	154750
met_252	405.954	1.158	24.724	194.54	Unknown	Unknown	679929	922082	855608	78654.1	89297.1	97656.1	110198	117850	115293	122429	114960	114850	973638	425036	572980	102079	100445	97240.8	141025	142363	142498	143568	112104	140749	786426	1160518	658421	79863.6	103446	106961	145414	156024	144376	157032	145810	154750
met_7052	548.023	1.159	29.279	228.85	Unknown	Unknown	14561	39683.9	140098	78654.1	89297.1	97656.1	110198	117850	115293	122429	114960	114850	3524.36	12317.6	17056.2	102079	100445	97240.8	141025	142363	142498	143568	112104	140749	11018.4	27512.2	171479	79863.6	103446	106961	145414	156024	144376	157032	145810	154750
met_8253	201.845	1.159	19.886	161.08	Unknown	Unknown	5133.23	20553.2	1975.41	78654.1	89297.1	97656.1	110198	117850	115293	122429	114960	114850	17869.3	9598.6	9388.84	102079	100445	97240.8	141025	142363	142498	143568	112104	140749	172799	26924.1	8164.97	79863.6	103446	106961	145414	156024	144376	157032	145810	154750
met_83	507.986	1.159	25.991	203.29	Unknown	Unknown	1530392	2463144	1896335	78654.1	89297.1	97656.1	110198	117850	115293	122429	114960	114850	4649267	3035638	1918469	102079	100445	97240.8	141025	142363	142498	7380.38	112104	140749	1764804	3114177	1361453	79863.6	103446	106961	145414	156024	144376	157032	145810	154750
met_6964	285.933	1.16	25.832	206.09	Unknown	Unknown	14550.4	23965.6	12060	78654.1	89297.1	97656.1	110198	117850	115293	122429	114960	114850	14172.8	9146.8	9701.96	102079	100445	97240.8	141025	142363	142498	143568	112104	140749	10969.5	33293.4	171479	79863.6	103446	106961	145414	156024	144376	157032	145810	154750
met_9677	529.99	1.16	28.777	225.08	Unknown	Unknown	136689	17834.7	4364.81	78654.1	89297.1	97656.1	110198	117850	115293	122429	114960	114850	12311.6	174561	7335.66	102079	100445	97240.8	141025	142363	142498	143568	112104	140749	9485.77	17644.9	5021.96	79863.6	103446	106961	145414	156024	144376	157032	145810	154750
met_5111	675.04	1.161	30.472	237.14	Unknown	Unknown	11359.9	155509	9344.87	78654.1	89297.1	97656.1	110198	117850	115293	122429	114960	114850	59187.8	18393.4	166492	102079	100445	97240.8	141025	142363	142498	143568	112104	140749	13369.3	49868.9	9343.56	79863.6	103446	106961	145414	156024	144376	157032	145810	154750
met_7247	401.045	1.162	28.916	228	Unknown	Unknown	10718.2	17825.6	10360.9	78654.1	89297.1	97656.1	110198	117850	115293	122429	114960	114850	16714.2	13066.1	15083.5	102079	100445	97240.8	141025	142363	142498	143568	112104	140749	14691	19363.7	14518.3	79863.6	103446	106961	145414	156024	144376	157032	145810	154750
met_59	343.87	1.163	19.978	157.71	Unknown	Unknown	1907037	5568073	1718698	78654.1	89297.1	97656.1	110198	117850	115293	122429	114960	114850	5312856	2757299	1927204	102079	100445	97240.8	141025	142363	13159.5	143568	5550.54	140749	2268950	6460544	2042723	79863.6	103446	106961	145414	156024	144376	157032	145810	154750
met_8810	277.011	1.163	24.457	195.29	Unknown	Unknown	11272.7	10601.5	12863	78654.1	89297.1	97656.1	110198	117850	115293	122429	114960	114850	12959.3	12924.6	166492	102079	100445	97240.8	141025	142363	142498	143568	112104	140749	10958.4	201159	9771.61	79863.6	103446	106961	145414	156024	144376	157032	145810	154750
met_12126	215.905	1.164	20.219	163.16	Unknown	Unknown	6140.81	9263.45	3502.54	78654.1	89297.1	97656.1	110198	117850	115293	122429	114960	114850	10784.6	3157.67	166492	102079	100445	97240.8	141025	142363	142498	143568	112104	140749	172799	14238.6	4017.91	79863.6	103446	106961	145414	156024	144376	157032	145810	154750
met_1774	361.924	1.164	21.125	166.55	Unknown	Unknown	35395.4	101470	39915.8	44320.7	89297.1	97656.1	21084.7	117850	115293	122429	114960	114850	152428	27134.5	38496.1	102079	100445	97240.8	141025	142363	142498	143568	112104	140749	41068.3	156064	171479	79863.6	103446	106961	145414	156024	144376	157032	145810	154750
met_53	772.072	1.164	33.387	259.4	Unknown	Unknown	1739798	6972982	1642808	78654.1	89297.1	97656.1	110198	117850	115293	122429	114960	114850	7200112	2809288	2354677	102079	100445	97240.8	141025	142363	142498	143568	112104	140749	5340299	8774621	1230447	79863.6	103446	106961	145414	156024	144376	157032	145810	154750
met_6801	219.027	1.164	22.369	180.6	Unknown	Unknown	11458.6	14551.3	16583.4	78654.1	89297.1	97656.1	110198	117850	115293	122429	114960	114850	15701.6	8464.8	14958.1	102079	100445	97240.8	141025	142363	142498	143568	112104	140749	11650.2	201159	14968.1	79863.6	103446	106961	145414	156024	144376	157032	145810	154750
met_77	628.007	1.164	29.324	228.48	Unknown	Unknown	3080384	3551586	1784424	78654.1	89297.1	97656.1	110198	117850	115293	122429	114960	114850	3337361	1816115	3004738	102079	100445	97240.8	141025	142363	142498	143568	112104	140749	3085105	4064867	3079915	79863.6	103446	106961	145414	156024	144376	157032	145810	154750
met_2994	578.842	1.166	26.424	206.06	Unknown	Unknown	13349	54576.9	38260.7	78654.1	89297.1	97656.1	110198	117850	115293	122429	114960	114850	134548	27484.1	10419.8	102079	100445	97240.8	141025	142363	142498	143568	112104	140749	16075.4	149664	171479	79863.6	103446	106961	145414	156024	144376	157032	145810	154750
met_7578	226.92	1.166	19.072	153.34	Unknown	Unknown	7943.13	22404.1	6419.22	78654.1	89297.1	97656.1	110198	117850	115293	122429	114960	114850	22101.9	14367.1	166492	102079	100445	97240.8	141025	142363	142498	143568	112104	140749	10037	25130.3	4862.31	79863.6	103446	106961	145414	156024	144376	157032	145810	154750
met_3027	259.894	1.167	19.616	156.68	Unknown	Unknown	66652.5	58738.5	11539.8	78654.1	89297.1	97656.1	110198	117850	115293	122429	114960	114850	57157.1	27021.8	32142.9	102079	100445	97240.8	141025	142363	142498	143568	112104	140749	16903.2	117861	24442.3	79863.6	103446	106961	145414	156024	144376	157032	145810	154750
met_4940	550.018	1.168	33.323	260.73	Unknown	Unknown	654.556	47329.7	15518.6	78654.1	89297.1	97656.1	110198	117850	115293	122429	114960	114850	75393.9	174561	166492	102079	100445	97240.8	141025	142363	142498	143568	112104	140749	18195.8	55643.6	9775.64	79863.6	103446	106961	145414	156024	144376	157032	145810	154750
met_7361	831.027	1.168	34.981	271.56	Unknown	Unknown	15995.5	21316.1	4458.87	78654.1	89297.1	97656.1	110198	117850	115293	122429	114960	114850	35565.2	174561	4644.26	102079	100445	97240.8	141025	142363	142498	143568	112104	140749	8530.49	33687.6	171479	79863.6	103446	106961	145414	156024	144376	157032	145810	154750
met_4765	203.886	1.169	19.463	157.5	Unknown	Unknown	14048.8	44018.9	18449.5	78654.1	89297.1	97656.1	110198	117850	115293	122429	114960	114850	44597.3	30013.5	13778.4	102079	100445	97240.8	141025	142363	142498	143568	112104	140749	12606.3	51651.1	15272.4	79863.6	103446	106961	145414	156024	144376	157032	145810	154750
met_780	306.905	1.169	19.154	151.78	Unknown	Unknown	299033	252903	76372.7	78654.1	89297.1	97656.1	110198	117850	115293	122429	114960	114850	276117	191020	302615	102079	100445	97240.8	141025	142363	142498	143568	112104	140749	220219	420939	51990.9	79863.6	103446	106961	145414	156024	144376	157032	145810	154750
met_3258	742.956	1.17	31.843	247.45	Unknown	Unknown	136689	39429.7	54910.9	78654.1	89297.1	97656.1	110198	117850	115293	122429	114960	114850	106576	16570.2	8724.99	102079	100445	97240.8	141025	142363	142498	143568	112104	140749	8567	90123.9	171479	79863.6	103446	106961	145414	156024	144376	157032	145810	154750
met_190	365.918	1.171	21.124	166.48	Unknown	Unknown	535522	1228111	521791	78654.1	89297.1	97656.1	36820.1	67107.7	115293	122429	114960	114850	2417431	410862	545006	102079	100445	97240.8	141025	142363	142498	143568	112104	140749	641798	1732184	621249	27248.8	103446	106961	23182.2	156024	144376	157032	145810	154750
met_305	450.971	1.171	24.459	191.81	Unknown	Unknown	252006	946635	215065	78654.1	89297.1	97656.1	110198	117850	115293	122429	114960	114850	925750	698054	846281	102079	100445	97240.8	141025	142363	142498	143568	112104	140749	844148	1049760	290313	79863.6	103446	106961	145414	156024	144376	157032	145810	154750
met_9525	608.044	1.172	29.233	227.95	Unknown	Unknown	136689	18465.8	3229.97	78654.1	89297.1	97656.1	110198	117850	115293	122429	114960	114850	16572.2	6283.9	9486.23	102079	100445	97240.8	141025	142363	142498	143568	112104	140749	2991.44	10506.6	4982.89	79863.6	103446	106961	145414	156024	144376	157032	145810	154750
met_147	448.973	1.176	24.456	191.81	Unknown	Unknown	1691386	2032731	369635	78654.1	89297.1	97656.1	110198	117850	115293	122429	114960	114850	2355294	1670711	1740371	102079	100445	97240.8	141025	142363	142498	4252.81	112104	140749	1783296	2221282	364938	79863.6	103446	106961	145414	156024	144376	157032	145810	154750
met_11742	409.969	1.184	28.747	226.49	Unknown	Unknown	2303.67	8640.66	1373.31	78654.1	89297.1	97656.1	110198	117850	115293	122429	114960	114850	1534.21	9327.2	166492	102079	100445	97240.8	141025	142363	142498	143568	112104	140749	7606.26	14668	7649.9	79863.6	103446	106961	145414	156024	144376	157032	145810	154750
met_481	304.907	1.185	19.144	151.74	Unknown	Unknown	359378	518869	107825	78654.1	89297.1	97656.1	110198	117850	115293	122429	114960	114850	609213	311532	255801	102079	100445	97240.8	141025	142363	142498	143568	112104	140749	400445	670560	441630	79863.6	103446	106961	145414	156024	144376	157032	145810	154750
met_1376	405.954	1.187	25.925	204.09	Unknown	Unknown	93622.2	138453	98173.3	78654.1	89297.1	97656.1	110198	117850	115293	122429	114960	114850	155186	53630.4	90221.8	102079	100445	97240.8	141025	142363	142498	143568	112104	140749	124656	176103	116722	79863.6	103446	106961	145414	156024	144376	157032	145810	154750
met_10267	512	1.188	32.576	255.31	Unknown	Unknown	4469.88	15414.6	3168.93	78654.1	89297.1	97656.1	110198	117850	115293	122429	114960	114850	200928	7511.96	166492	102079	100445	97240.8	141025	142363	142498	143568	112104	140749	5645.34	18647.4	14331.8	79863.6	103446	106961	145414	156024	144376	157032	145810	154750
met_8586	226.92	1.189	24.325	196.19	Unknown	Unknown	136689	7556.73	6709.61	78654.1	89297.1	97656.1	110198	117850	115293	122429	114960	114850	14741.1	13195.3	11517.2	102079	100445	97240.8	141025	142363	142498	143568	112104	140749	8321.79	23532.3	10529.1	79863.6	103446	106961	145414	156024	144376	157032	145810	154750
met_6127	365.908	1.191	26.246	207.4	Unknown	Unknown	32546.9	29063.3	10507.7	78654.1	89297.1	97656.1	110198	117850	115293	122429	114960	114850	200928	19409.4	16768.2	102079	100445	97240.8	141025	142363	142498	143568	112104	140749	33761.3	29327.6	171479	79863.6	103446	106961	145414	156024	144376	157032	145810	154750
met_5645	238.094	1.192	19.616	157.37	Unknown	Unknown	136689	155509	140098	78654.1	89297.1	97656.1	110198	117850	115293	9544.44	12352.2	114850	15004.2	174561	14647.6	20656.8	13134.1	97240.8	141025	142363	142498	5476.6	9028.95	140749	172799	201159	171479	79863.6	17675.5	19790.5	145414	10472	18971	17426.8	19454.5	14456.2
met_3334	446.977	1.193	24.466	191.95	Unknown	Unknown	4326.67	51895	140098	78654.1	89297.1	97656.1	110198	117850	115293	122429	114960	114850	125051	60598	28356.4	102079	100445	97240.8	141025	142363	142498	143568	112104	140749	12498.3	49286.5	51959	79863.6	103446	106961	145414	156024	144376	157032	145810	154750
met_835	376.839	1.193	20.542	161.67	Unknown	Unknown	66635.3	64102.7	66002.1	91359.8	86155.6	86242.7	12301.7	75184.1	128350	103660	94756.4	37197.4	23841.1	12624.8	72151.4	119253	95220.6	31444.5	91884.7	117018	127635	13435.1	61229.5	114643	80202.9	19983.9	74546	100256	76418.8	87599.7	47759.1	87226.6	100012	96276.3	27657.3	111058
met_9082	306.904	1.197	25.134	199.85	Unknown	Unknown	3763.1	3622.03	140098	78654.1	89297.1	97656.1	110198	117850	115293	122429	114960	114850	23581	11190.8	16402.4	102079	100445	97240.8	141025	142363	142498	143568	112104	140749	8353.37	13476.8	171479	79863.6	103446	106961	145414	156024	144376	157032	145810	154750
met_10216	405.953	1.198	34.663	273.64	Unknown	Unknown	12286	9011.5	6981.65	78654.1	89297.1	97656.1	110198	117850	115293	122429	114960	114850	12196.3	4225.18	5995.33	102079	100445	97240.8	141025	142363	142498	143568	112104	140749	172799	10794.8	11123.9	79863.6	103446	106961	145414	156024	144376	157032	145810	154750
met_11316	704.738	1.198	29.074	226.01	Unknown	Unknown	2272.88	7280.15	9554.71	78654.1	89297.1	97656.1	110198	117850	115293	122429	114960	114850	5837.58	174561	7387.82	102079	100445	97240.8	141025	142363	142498	143568	112104	140749	4349.31	15099.5	171479	79863.6	103446	106961	145414	156024	144376	157032	145810	154750
met_4326	830.03	1.201	34.133	264.96	Unknown	Unknown	20590.3	32922.8	17737.5	78654.1	89297.1	97656.1	110198	117850	115293	122429	114960	114850	62828.6	29183	21766.3	102079	100445	97240.8	141025	142363	142498	143568	112104	140749	24827.5	57301.3	33120.9	79863.6	103446	106961	145414	156024	144376	157032	145810	154750
met_5037	426.003	1.202	26.586	209.04	Unknown	Unknown	35838.6	25052.6	140098	78654.1	89297.1	97656.1	110198	117850	115293	122429	114960	114850	57702.3	174561	25830.8	102079	100445	97240.8	141025	142363	142498	143568	112104	140749	4976.22	21777.7	33012.7	79863.6	103446	106961	145414	156024	144376	157032	145810	154750
met_5571	432.8	1.202	21.359	167.44	Unknown	Unknown	10362	8100.18	10636.5	4897.55	10264.8	20004.3	11274.4	18382.2	11756.8	10322.8	6865.03	2982.68	16978.4	13430.7	13735.6	11169.6	8834.54	23062.5	10628.7	11782	16430.5	10104.1	11633.9	16529.7	15193.5	12556.3	15525.4	8091.98	9277.34	11739.3	8133.68	6887.55	9996.86	14308.4	10551	10704.6
met_2632	448.772	1.204	22.04	172.66	Unknown	Unknown	73952.7	31132	79860.9	78654.1	89297.1	97656.1	110198	117850	115293	122429	114960	114850	200928	44857.2	74959.1	102079	100445	97240.8	141025	142363	142498	143568	112104	140749	41981.4	28147.5	75136.4	79863.6	103446	106961	145414	156024	144376	157032	145810	154750
met_26	341.871	1.205	19.872	156.89	Unknown	Unknown	5205934	1.531296E7	4259245	100755	1.63034e+06	39163.9	126578	2.51023e+06	2.10598e+06	2.45286e+06	2.48269e+06	2.26403e+06	1.466838E7	7622268	5304061	2.50092e+06	58838.5	2.08453e+06	75850	4340.71	4024.97	2.55926e+06	21100.4	2.98453e+06	6168367	1.741152E7	5385528	2.61652e+06	101074	71032.5	2.35338e+06	3.12268e+06	1940.19	44724.4	62986.7	3.16744e+06
met_8803	236.994	1.207	24.414	196.47	Unknown	Unknown	13039.4	10178.4	13141.5	78654.1	89297.1	97656.1	110198	117850	115293	122429	114960	114850	10099.7	9243.43	17627.5	102079	100445	97240.8	141025	142363	142498	143568	112104	140749	15673.6	201159	171479	79863.6	103446	106961	145414	156024	144376	157032	145810	154750
met_3010	312.979	1.208	24.747	196.6	Unknown	Unknown	49135.5	25814.7	77955	78654.1	89297.1	97656.1	110198	117850	115293	122429	114960	114850	22858.3	54597.6	71072.9	102079	100445	97240.8	141025	142363	142498	143568	112104	140749	58222.5	19210.2	79992.8	79863.6	103446	106961	145414	156024	144376	157032	145810	154750
met_1805	433	1.209	24.839	195.08	Unknown	Unknown	105292	67796.1	126063	78654.1	89297.1	97656.1	110198	117850	115293	122429	114960	114850	33393.6	105175	103427	102079	100445	97240.8	141025	142363	142498	143568	112104	140749	115229	58094.2	117405	79863.6	103446	106961	145414	156024	144376	157032	145810	154750
met_708	407.952	1.21	24.742	194.68	Unknown	Unknown	525860	619744	51642.5	78654.1	89297.1	97656.1	110198	117850	115293	122429	114960	114850	200928	157648	328470	102079	100445	97240.8	141025	142363	142498	143568	112104	140749	354867	388931	99295.3	79863.6	103446	106961	145414	156024	144376	157032	145810	154750
met_6341	592.836	1.212	26.955	210.12	Unknown	Unknown	34059.1	155509	16294.6	78654.1	89297.1	97656.1	110198	117850	115293	122429	114960	114850	7154.33	18297.6	16932.3	102079	100445	97240.8	141025	142363	142498	143568	112104	140749	12527.1	15341.5	5937.06	79863.6	103446	106961	145414	156024	144376	157032	145810	154750
met_8868	286.936	1.212	20.792	165.44	Unknown	Unknown	6026.35	8551.05	4816.81	78654.1	89297.1	97656.1	110198	117850	115293	122429	114960	114850	26430.5	7281.28	7971.83	102079	100445	97240.8	141025	142363	142498	143568	112104	140749	6253.86	201159	21389.4	79863.6	103446	106961	145414	156024	144376	157032	145810	154750
met_3548	446.774	1.213	22.021	172.54	Unknown	Unknown	44623.5	11758.3	24721.7	78654.1	89297.1	97656.1	110198	117850	115293	122429	114960	114850	7547.85	37496.2	55333.8	102079	100445	97240.8	141025	142363	2552.95	143568	112104	140749	43092.7	6369.99	63965.7	18961	103446	106961	145414	156024	144376	157032	145810	154750
met_5946	210.929	1.213	20.364	164.54	Unknown	Unknown	19484.5	15344.7	18312.2	78654.1	89297.1	97656.1	110198	117850	115293	122429	114960	114850	5237.06	10056.6	19731.8	102079	100445	97240.8	141025	142363	142498	143568	112104	140749	13786.9	16277.1	171479	79863.6	103446	106961	145414	156024	144376	157032	145810	154750
met_3560	557.869	1.214	25.893	202.04	Unknown	Unknown	35442	58249.7	47683.7	78654.1	89297.1	97656.1	110198	117850	115293	122429	114960	114850	44462.2	36362	36469.4	102079	100445	97240.8	141025	142363	142498	143568	112104	140749	51006.3	62049.9	171479	79863.6	103446	106961	145414	156024	144376	157032	145810	154750
met_1779	467.972	1.215	24.701	193.51	Unknown	Unknown	124365	150368	140098	78654.1	89297.1	97656.1	110198	117850	115293	122429	114960	114850	171017	94462.1	166492	102079	100445	97240.8	141025	142363	142498	143568	112104	140749	62508	50153.4	149949	79863.6	103446	106961	145414	156024	144376	157032	145810	154750
met_2524	555.871	1.218	25.878	201.95	Unknown	Unknown	56596.3	72840.9	20814	78654.1	89297.1	97656.1	110198	117850	115293	122429	114960	114850	78120.3	67922.3	49779.1	102079	100445	97240.8	141025	142363	142498	143568	112104	140749	63339	88983	54607.1	79863.6	103446	106961	145414	156024	144376	157032	145810	154750
met_136	363.919	1.219	21.127	166.55	Unknown	Unknown	789631	1727831	714230	78654.1	89297.1	130651	110198	117850	115293	65181.3	138346	114850	2299439	675291	971849	102079	79976.6	97240.8	141025	142363	142498	38275.5	112969	140749	917966	2793636	1063507	79863.6	103446	106961	145414	156024	144376	157032	145810	154750
met_2835	589.988	1.22	28.338	221.04	Unknown	Unknown	35679.2	52767.9	82483.4	78654.1	89297.1	97656.1	110198	117850	115293	122429	114960	114850	34445.1	65825	63104.3	102079	100445	97240.8	141025	142363	142498	143568	112104	140749	39790.5	84401.3	171479	79863.6	103446	106961	145414	156024	144376	157032	145810	154750
met_5089	590.839	1.224	26.948	210.08	Unknown	Unknown	12274.7	16385	28382.6	78654.1	89297.1	97656.1	110198	117850	115293	122429	114960	114850	10595.1	9458.14	27996.1	102079	100445	97240.8	141025	142363	142498	143568	112104	140749	25427.3	14192.1	62643.8	79863.6	103446	106961	145414	156024	144376	157032	145810	154750
met_4341	667.998	1.226	30.873	240.39	Unknown	Unknown	30157.1	17022.8	52902.7	78654.1	89297.1	97656.1	110198	117850	115293	122429	114960	114850	47145.8	21353.2	24275.1	102079	100445	97240.8	141025	142363	142498	143568	112104	140749	21174.2	42855.9	33761	79863.6	103446	106961	145414	156024	144376	157032	145810	154750
met_8061	701.936	1.226	34.742	270.49	Unknown	Unknown	10845.2	8337.04	23004.9	78654.1	89297.1	97656.1	110198	117850	115293	122429	114960	114850	13478.2	11588.3	166492	102079	100445	97240.8	141025	142363	142498	143568	112104	140749	13065.9	13217.5	171479	79863.6	103446	106961	145414	156024	144376	157032	145810	154750
met_6665	263.886	1.227	21.982	175.7	Unknown	Unknown	20249.3	23529.5	34850.9	78654.1	89297.1	97656.1	110198	117850	115293	122429	114960	114850	200928	12751.6	10145.9	102079	100445	97240.8	141025	142363	142498	143568	112104	140749	172799	12310.8	7407.82	79863.6	103446	106961	145414	156024	144376	157032	145810	154750
met_1780	328.952	1.228	24.423	193.58	Unknown	Unknown	136689	111167	79779.4	78654.1	89297.1	97656.1	110198	117850	115293	122429	114960	114850	78974.2	134942	166492	102079	100445	97240.8	141025	142363	142498	143568	112104	140749	251337	120338	74514.4	79863.6	103446	106961	145414	156024	144376	157032	145810	154750
met_6203	285.933	1.229	25.453	203.04	Unknown	Unknown	21792.4	6617.67	7938.84	78654.1	89297.1	97656.1	110198	117850	115293	122429	114960	114850	37222.9	689.157	23240.5	102079	100445	97240.8	141025	142363	142498	3290.71	112104	140749	172799	3136.16	7882.32	79863.6	103446	106961	145414	156024	144376	157032	145810	154750
met_2686	792.864	1.231	32.057	248.87	Unknown	Unknown	68377.8	52706.8	38623.1	78654.1	89297.1	97656.1	110198	117850	115293	122429	114960	114850	44289.4	47025.8	65376.7	102079	100445	97240.8	141025	142363	142498	143568	112104	140749	59520.3	49119.4	57374.5	79863.6	103446	106961	145414	156024	144376	157032	145810	154750
met_6367	521.066	1.231	27.645	216.23	Unknown	Unknown	136689	29150.7	140098	78654.1	89297.1	97656.1	110198	117850	115293	122429	114960	114850	21743.8	13855.4	13815.1	102079	100445	97240.8	141025	142363	142498	143568	112104	140749	31670.2	30445.1	21364.3	79863.6	103446	106961	145414	156024	144376	157032	145810	154750
met_23	339.875	1.234	19.813	156.45	Unknown	Unknown	6574701	1.438811E7	6361063	1.55486e+06	224020	2.1671e+06	281365	2.51023e+06	283877	2.45286e+06	2.48269e+06	2.26403e+06	1.366528E7	7981564	6448095	3040.43	2.77534e+06	217379	373420	329123	2.47787e+06	188069	26947.8	2.98453e+06	5714095	1.62557E7	4995513	2.61652e+06	207573	236287	350022	3.12268e+06	2.8272e+06	215297	277815	199718
met_4649	650.796	1.238	28.089	218.63	Unknown	Unknown	30357.8	33758.9	31310.9	78654.1	89297.1	97656.1	110198	117850	115293	122429	114960	114850	25696.5	34086	34275.4	102079	100445	97240.8	141025	142363	142498	143568	112104	140749	23914.4	18120.6	15701	79863.6	103446	106961	145414	156024	144376	157032	145810	154750
met_286	399.887	1.239	21.677	170.39	Unknown	Unknown	699630	797214	640828	78654.1	89297.1	97656.1	110198	117850	115293	122429	114960	114850	798136	452947	704942	102079	100445	37548.6	141025	142363	27416.8	143568	112104	140749	714275	958213	725937	79863.6	103446	106961	57555.2	156024	144376	157032	145810	154750
met_607	545.951	1.247	26.36	205.83	Unknown	Unknown	356979	409601	334176	78654.1	89297.1	97656.1	110198	117850	115293	122429	114960	114850	393715	63616.7	367076	102079	100445	97240.8	141025	142363	142498	143568	112104	140749	366476	447892	354406	79863.6	103446	106961	145414	156024	144376	157032	145810	154750
met_7075	265.883	1.248	20.188	161.14	Unknown	Unknown	16483.1	32556.4	2322.29	78654.1	89297.1	97656.1	110198	117850	115293	122429	114960	114850	16241.5	7441.02	14169.7	102079	100445	97240.8	141025	142363	142498	143568	112104	140749	14640.5	201159	38150.4	79863.6	103446	106961	145414	156024	144376	157032	145810	154750
met_416	221.843	1.249	21.524	173.55	Unknown	Unknown	501168	567907	472735	78654.1	89297.1	97656.1	110198	117850	115293	122429	114960	114850	599738	305061	478498	102079	100445	97240.8	141025	142363	142498	143568	112104	140749	527758	681386	524776	79863.6	103446	106961	145414	156024	144376	157032	145810	154750
met_328	337.879	1.253	19.817	156.52	Unknown	Unknown	351794	956065	312125	13878.5	27037.2	10379.9	15541.6	64501.2	66607	7035.04	101680	25428.7	912551	453531	363078	16029.7	66951	89697.8	25172.9	10646.8	30929.6	6869.77	9892.89	17363.5	452321	1083698	385336	50982.8	10866.9	10295.1	10967	133171	18432.8	28700.4	113244	13499.1
met_6095	508.978	1.254	27.452	214.84	Unknown	Unknown	30220.3	14969.1	32676.5	78654.1	89297.1	97656.1	110198	117850	115293	122429	114960	114850	27072.5	21835.1	166492	102079	100445	97240.8	141025	142363	142498	143568	112104	140749	32020.4	30377.1	171479	79863.6	103446	106961	145414	156024	144376	157032	145810	154750
met_518	699.937	1.257	30.685	238.67	Unknown	Unknown	386506	493804	321136	78654.1	89297.1	97656.1	110198	117850	115293	122429	114960	114850	517534	298454	385749	102079	100445	97240.8	141025	142363	142498	143568	112104	140749	392589	561537	354319	79863.6	103446	106961	145414	156024	144376	157032	145810	154750
met_2151	345.954	1.258	20.765	163.95	Unknown	Unknown	136689	30457.2	63170.3	78654.1	89297.1	97656.1	110198	117850	115293	122429	114960	114850	18661.9	93084.2	43810.2	102079	100445	97240.8	141025	142363	142498	143568	112104	140749	18571.8	58162.4	77999.4	79863.6	103446	106961	145414	156024	144376	2923.64	145810	154750
met_2325	467.973	1.264	24.696	193.52	Unknown	Unknown	56111.7	143117	69106	78654.1	89297.1	97656.1	110198	117850	115293	122429	114960	114850	200928	53074	114416	102079	100445	97240.8	141025	142363	142498	143568	112104	140749	50006.5	96802	50049.1	79863.6	103446	106961	145414	156024	144376	157032	145810	154750
met_29	652.051	1.264	30.267	235.74	Unknown	Unknown	7415495	1.148111E7	6394888	78654.1	89297.1	97656.1	110198	117850	115293	122429	114960	114850	1.155851E7	5541550	7185428	102079	100445	97240.8	141025	142363	142498	143568	112104	140749	7675306	1.345201E7	7175231	79863.6	103446	106961	145414	156024	144376	157032	145810	154750
met_1563	638.926	1.265	28.927	225.28	Unknown	Unknown	181350	65290.7	101577	78654.1	89297.1	97656.1	110198	117850	115293	122429	114960	114850	85292.4	156420	24368.7	102079	100445	97240.8	141025	142363	142498	143568	112104	140749	170117	24344.2	36178	79863.6	103446	106961	145414	156024	144376	157032	145810	154750
met_2975	794.861	1.266	32.071	249	Unknown	Unknown	63848.3	52284.4	62957.9	78654.1	89297.1	97656.1	110198	117850	115293	122429	114960	114850	50616.9	48772.3	57650.3	102079	100445	97240.8	141025	142363	142498	143568	112104	140749	56732.4	31641.1	67214.9	79863.6	103446	106961	145414	156024	144376	157032	145810	154750
met_1637	208.931	1.267	20.322	164.3	Unknown	Unknown	51809	46809.3	43992.5	78654.1	89297.1	97656.1	110198	117850	115293	122429	114960	114850	99744.1	89835.3	82033	102079	100445	97240.8	141025	142363	142498	143568	112104	140749	39057.9	62077.2	43674.7	79863.6	103446	106961	145414	1349.79	144376	157032	145810	154750
met_1639	285.933	1.267	22.162	176.5	Unknown	Unknown	117598	41604.8	24831.1	78654.1	89297.1	97656.1	110198	117850	115293	122429	114960	114850	68129	120665	154004	102079	100445	97240.8	141025	142363	142498	143568	112104	140749	29921.8	106210	22174.9	79863.6	103446	106961	145414	156024	144376	157032	145810	154750
met_270	219.845	1.267	21.521	173.63	Unknown	Unknown	796462	787390	702370	78654.1	89297.1	97656.1	110198	117850	115293	122429	114960	114850	957733	487932	759298	102079	100445	97240.8	141025	142363	142498	143568	112104	140749	828658	1100211	818980	79863.6	103446	106961	145414	156024	144376	157032	145810	154750
met_1547	878.97	1.271	34.972	271.28	Unknown	Unknown	181388	160266	122702	78654.1	89297.1	97656.1	110198	117850	115293	122429	114960	114850	142776	113332	54162.9	102079	100445	97240.8	141025	142363	142498	143568	112104	140749	64745.3	50492.2	176852	79863.6	103446	106961	145414	156024	144376	157032	145810	154750
met_326	595.04	1.271	29.409	229.47	Unknown	Unknown	937094	482430	684674	78654.1	89297.1	97656.1	110198	117850	115293	122429	114960	114850	200928	381376	889437	102079	100445	97240.8	141025	142363	142498	143568	112104	140749	830484	577765	819826	79863.6	103446	106961	145414	156024	144376	157032	145810	154750
met_2774	365.907	1.272	22.657	178.71	Unknown	Unknown	136689	67027.8	41169.2	78654.1	89297.1	97656.1	110198	117850	115293	122429	114960	114850	29797.6	98700.5	50309.7	102079	100445	97240.8	141025	142363	142498	143568	112104	140749	22271	201159	93758.9	79863.6	103446	106961	145414	156024	144376	157032	145810	154750
met_5300	327.966	1.273	25.635	203.33	Unknown	Unknown	31339.9	19781.5	15456.4	78654.1	89297.1	97656.1	110198	117850	115293	122429	114960	114850	40276.9	55947.4	39229.8	102079	100445	97240.8	141025	142363	142498	143568	112104	140749	33627.8	201159	171479	79863.6	103446	106961	145414	156024	144376	157032	145810	154750
met_6249	330.949	1.277	24.431	193.62	Unknown	Unknown	39693.4	155509	33326.4	78654.1	89297.1	97656.1	110198	117850	115293	122429	114960	114850	35052.2	174561	13001.5	102079	100445	97240.8	141025	142363	142498	143568	112104	140749	26257.6	12226.1	23679.1	79863.6	103446	106961	145414	156024	144376	157032	145810	154750
met_1064	389.963	1.28	22.24	175.04	Unknown	Unknown	161374	155492	348442	78654.1	89297.1	97656.1	110198	117850	115293	122429	114960	114850	200928	363156	158603	102079	100445	97240.8	141025	142363	142498	143568	112104	140749	60690.1	127253	132164	79863.6	103446	106961	145414	156024	144376	157032	145810	154750
met_444	401.885	1.281	21.709	170.61	Unknown	Unknown	480127	524311	437834	29561.2	36761.3	4962.71	93043.9	7740.99	96653.8	88223.8	115858	1620.05	563240	283803	466305	1739.51	55497.1	90473.8	145116	146642	1964.27	191294	146739	161924	483561	617293	463166	62814.4	56759	6626.81	172833	193633	4801.1	142615	171139	141586
met_242	387.965	1.284	22.224	174.92	Unknown	Unknown	963126	751564	505828	78654.1	89297.1	97656.1	110198	117850	115293	122429	114960	114850	714742	1039839	1075407	102079	100445	97240.8	141025	142363	142498	143568	4618.15	140749	621377	469142	933242	79863.6	103446	106961	145414	156024	144376	157032	145810	2224.1
met_2178	546.025	1.287	27.974	218.59	Unknown	Unknown	29406.1	26218.7	72211.4	78654.1	89297.1	97656.1	110198	117850	115293	122429	114960	114850	164073	34690	84066.6	102079	100445	97240.8	141025	142363	142498	143568	112104	140749	61014.7	131402	97993.3	79863.6	103446	106961	145414	156024	144376	157032	145810	154750
met_786	363.911	1.287	22.66	178.78	Unknown	Unknown	258118	227157	139481	78654.1	89297.1	97656.1	110198	117850	115293	122429	114960	114850	183453	247984	139699	102079	100445	97240.8	141025	142363	142498	143568	112104	140749	257863	216060	273838	79863.6	103446	106961	145414	156024	144376	157032	145810	154750
met_7469	233.861	1.288	22.111	177.85	Unknown	Unknown	11212.7	10360.7	23745.1	78654.1	89297.1	97656.1	110198	117850	115293	122429	114960	114850	12490.8	22136.6	8970.49	102079	100445	97240.8	141025	142363	142498	143568	112104	140749	11309.8	17244.7	9316.24	79863.6	103446	106961	145414	156024	144376	157032	145810	154750
met_251	543.953	1.289	26.373	205.97	Unknown	Unknown	955670	1032336	863104	78654.1	89297.1	97656.1	110198	117850	115293	122429	114960	114850	1015419	395226	961459	102079	100445	97240.8	141025	142363	142498	143568	112104	140749	943676	1209452	900163	79863.6	103446	106961	145414	156024	144376	157032	145810	154750
met_3569	201.889	1.291	19.41	157.15	Unknown	Unknown	37773.2	57094.4	53214.8	78654.1	89297.1	97656.1	110198	117850	115293	122429	114960	114850	42915.8	29864.9	46856	102079	100445	97240.8	141025	142363	142498	143568	112104	140749	60123.6	27200.2	62434.9	79863.6	103446	106961	145414	156024	144376	157032	145810	154750
met_495	650.056	1.293	30.275	235.83	Unknown	Unknown	438957	417183	370724	78654.1	89297.1	97656.1	110198	117850	115293	122429	114960	114850	669951	121767	425307	102079	100445	97240.8	141025	142363	142498	143568	112104	140749	433274	805252	419742	79863.6	103446	106961	145414	156024	144376	157032	145810	154750
met_1051	283.264	1.295	21.855	174.11	(+)-Isostearic acid, [M-H]1-; 10-methyl-heptadecanoic acid, [M-H]1-; 11,15-dimethyl-hexadecanoic acid, [M-H]1-; 14-Methylheptadecanoic acid, [M-H]1-; 15-methyl-heptadecanoic acid, [M-H]1-; 2,14-dimethyl-hexadecanoic acid, [M-H]1-; 2,6-Dimethyl-5-heptenyl nonanoate, [M-H]1-; 2,6-dimethyl-hexadecanoic acid, [M-H]1-; 4,14-dimethyl-hexadecanoic acid, [M-H]1-; 4,8-dimethyl-hexadecanoic acid, [M-H]1-; …	FA-like, [M-H]1-	57066.6	43753.4	48120.2	90091.1	44829.2	98566.1	84343.7	56166.6	52966	240159	88503.6	63361.1	69236.5	60745.6	92237.3	49328.1	57741.6	71448.6	94966.6	52233.3	42926.2	52047.6	66541.4	89339.5	79152.3	48114.2	60709.9	23242.4	54035.8	88703.5	89793.2	70197.2	38572.5	56559.8	126141	114514
met_1397	261.889	1.295	21.012	167.94	Unknown	Unknown	190150	143029	215629	78654.1	89297.1	97656.1	110198	117850	115293	122429	114960	114850	200928	125940	176322	102079	100445	97240.8	141025	142363	142498	143568	112104	140749	162326	117808	28078.3	79863.6	103446	106961	145414	156024	144376	157032	145810	154750
met_1015	363.91	1.296	26.22	207.24	Unknown	Unknown	254785	197509	217676	78654.1	89297.1	97656.1	110198	117850	115293	122429	114960	114850	157606	75460.3	76753.6	102079	100445	97240.8	141025	142363	142498	143568	112104	140749	252756	318431	231362	79863.6	103446	106961	145414	156024	144376	157032	145810	154750
met_334	261.889	1.299	19.488	155.59	Unknown	Unknown	1032824	810868	963935	78654.1	89297.1	97656.1	110198	117850	115293	122429	114960	114850	200928	543225	1003183	102079	100445	97240.8	141025	142363	142498	143568	112104	140749	877289	201159	1036685	79863.6	103446	106961	145414	156024	144376	157032	145810	154750
met_158	381.058	1.302	24.087	189.89	Unknown	Unknown	1397620	2078406	1350042	78654.1	89297.1	97656.1	110198	117850	115293	122429	114960	114850	1887646	825028	1467237	102079	100445	97240.8	141025	142363	142498	143568	112104	140749	1347523	2278807	1369895	79863.6	103446	106961	145414	156024	144376	157032	145810	154750
met_3696	429.998	1.304	31.846	250.75	Unknown	Unknown	66621.9	78579.6	9112.31	78654.1	89297.1	97656.1	110198	117850	115293	122429	114960	114850	96758.4	48665.9	14470.6	102079	100445	97240.8	141025	142363	142498	143568	112104	140749	38974	2002.86	32186.8	79863.6	103446	106961	145414	156024	144376	157032	145810	154750
met_370	490.02	1.305	25.686	201.07	Unknown	Unknown	587931	685992	533855	78654.1	89297.1	97656.1	110198	117850	115293	122429	114960	114850	722256	467898	645051	102079	100445	97240.8	141025	142363	142498	143568	112104	140749	596067	659855	530602	79863.6	103446	106961	145414	156024	144376	157032	145810	154750
met_1554	591.042	1.306	29.485	230.06	Unknown	Unknown	119755	175341	86986.7	78654.1	89297.1	97656.1	110198	117850	115293	122429	114960	114850	159790	64556.5	129844	102079	100445	97240.8	141025	142363	142498	143568	112104	140749	70226.5	207084	113269	79863.6	103446	106961	145414	156024	144376	157032	145810	154750
met_622	782.994	1.313	33.144	257.44	Unknown	Unknown	344117	392861	308898	78654.1	89297.1	97656.1	110198	117850	115293	122429	114960	114850	390998	237690	360194	102079	100445	97240.8	141025	142363	142498	143568	112104	140749	338920	414735	320050	79863.6	103446	106961	145414	156024	144376	157032	145810	154750
met_1310	329.923	1.32	25.956	205.89	Unknown	Unknown	121312	203563	164691	78654.1	89297.1	97656.1	110198	117850	115293	122429	114960	114850	77800.2	136525	161565	102079	100445	97240.8	141025	142363	142498	143568	112104	140749	45821	249211	164670	79863.6	103446	106961	145414	156024	144376	157032	145810	154750
met_156	261.038	1.324	23.977	191.95	Unknown	Unknown	1647408	155509	1623480	78654.1	89297.1	97656.1	110198	117850	115293	122429	114960	114850	2515762	1071807	1686761	102079	100445	97240.8	141025	142363	142498	143568	112104	140749	1716179	2772370	1661405	79863.6	103446	106961	145414	156024	144376	157032	145810	154750
met_820	426.004	1.324	24.064	189.03	Unknown	Unknown	257534	355496	214262	78654.1	89297.1	97656.1	110198	117850	115293	122429	114960	114850	371659	171003	265059	102079	100445	97240.8	141025	142363	142498	143568	112104	140749	182667	355646	251128	79863.6	103446	106961	145414	156024	144376	157032	145810	154750
met_533	321.909	1.328	19.477	154.08	Unknown	Unknown	494506	406011	507761	78654.1	89297.1	97656.1	110198	117850	1683.76	122429	114960	114850	328937	274140	487625	102079	100445	97240.8	141025	142363	142498	143568	112104	140749	510353	411090	599374	79863.6	103446	2429.87	1320.99	156024	144376	157032	145810	154750
met_8784	210.929	1.328	20.31	164.11	Unknown	Unknown	5532.43	18409.6	5057.94	78654.1	89297.1	97656.1	110198	117850	115293	122429	114960	114850	10965	21229.4	166492	102079	100445	97240.8	141025	142363	142498	143568	112104	140749	4554.35	6740.02	4993.2	79863.6	103446	106961	145414	156024	144376	157032	145810	154750
met_347	429.998	1.329	26.78	210.51	Unknown	Unknown	713373	786565	587551	78654.1	89297.1	97656.1	110198	117850	115293	122429	114960	114850	809027	523227	725803	102079	100445	97240.8	141025	142363	142498	143568	112104	140749	642185	695888	528700	79863.6	103446	106961	145414	156024	144376	157032	145810	154750
met_8035	330.949	1.336	20.414	161.41	Unknown	Unknown	5665.32	12894.1	140098	78654.1	89297.1	97656.1	110198	117850	115293	122429	114960	114850	21273.4	25189.8	8620.16	102079	100445	97240.8	141025	142363	142498	143568	112104	140749	5202.13	201159	17048.4	79863.6	103446	106961	145414	156024	144376	157032	145810	154750
met_922	529.991	1.338	31.701	248.19	Unknown	Unknown	234458	286685	204371	78654.1	89297.1	97656.1	110198	117850	115293	122429	114960	114850	227868	41729.4	227316	102079	100445	97240.8	141025	142363	142498	143568	112104	140749	249357	358339	266639	79863.6	103446	106961	145414	156024	144376	157032	145810	154750
met_1698	381.058	1.34	29.404	232.26	Unknown	Unknown	123070	87831	98931.2	78654.1	89297.1	97656.1	110198	117850	115293	122429	114960	114850	150942	177816	7719.99	102079	100445	97240.8	141025	142363	142498	143568	112104	140749	88691.9	56097.4	101975	79863.6	103446	106961	145414	156024	144376	157032	145810	154750
met_1565	502.019	1.342	26.034	203.72	Unknown	Unknown	127490	87644.6	108075	78654.1	89297.1	97656.1	110198	117850	115293	122429	114960	114850	75402	121428	189974	102079	100445	97240.8	141025	142363	142498	143568	112104	140749	172799	114206	129430	79863.6	103446	106961	145414	156024	144376	157032	145810	154750
met_218	365.918	1.344	21.065	166.03	Unknown	Unknown	1362568	1060452	1218384	287256	197918	183244	52831.3	59736.4	158312	213056	94264.5	191197	1316311	848970	1294020	186738	40796.5	33987	250233	214200	281383	236992	191595	260690	1163147	1204674	1284202	56419.5	55983	194851	44194.5	406255	281205	308718	19050.7	335984
met_1087	361.923	1.345	21.09	166.29	Unknown	Unknown	110147	90148.8	124792	40403.4	89297.1	97656.1	41708.7	46175.6	50101	42442.2	50510.6	48219.8	28308.3	92011.1	133892	102079	16109.7	97240.8	36543.8	94508.6	53955.1	73491.1	58150	65893.1	133219	98294.8	87712.1	176394	103446	106961	93081.8	99698.7	95595.4	70565.9	95898.9	89514.9
met_528	507.976	1.345	27.432	214.7	Unknown	Unknown	423577	514554	337304	78654.1	89297.1	97656.1	110198	117850	115293	122429	114960	114850	538646	284394	404835	102079	100445	97240.8	141025	142363	142498	143568	112104	140749	391041	578805	386903	79863.6	103446	106961	145414	156024	144376	157032	145810	154750
met_3913	291.988	1.348	23.17	184.46	Unknown	Unknown	54872.9	34971.2	17540.4	78654.1	89297.1	97656.1	110198	117850	115293	122429	114960	114850	38462.8	174561	24101.8	102079	100445	97240.8	141025	142363	142498	143568	112104	140749	33275.4	40609.2	24638.8	79863.6	103446	106961	145414	156024	144376	157032	145810	154750
met_409	567.997	1.349	27.48	214.49	Unknown	Unknown	567774	671832	515099	78654.1	89297.1	97656.1	110198	117850	115293	122429	114960	114850	485691	443062	577746	102079	100445	97240.8	141025	142363	142498	143568	112104	140749	556346	812315	502771	79863.6	103446	106961	145414	156024	144376	157032	145810	154750
met_9018	285.933	1.349	27.122	216.5	Unknown	Unknown	5523.72	9526.34	10388.1	78654.1	89297.1	97656.1	110198	117850	115293	122429	114960	114850	6522.1	24342.8	2394.66	102079	100445	97240.8	141025	142363	142498	143568	112104	140749	6385.15	7664.06	171479	79863.6	103446	106961	145414	156024	144376	157032	145810	154750
met_153	429.999	1.355	25.692	201.87	Unknown	Unknown	1865526	2095519	1594031	78654.1	89297.1	97656.1	110198	117850	115293	122429	114960	114850	1360.64	1343693	1922243	102079	100445	97240.8	141025	142363	142498	143568	112104	140749	1846206	2315023	1744909	79863.6	103446	106961	145414	156024	144376	157032	145810	154750
met_982	401.045	1.355	25.481	200.65	Unknown	Unknown	152695	250790	196314	78654.1	89297.1	97656.1	110198	117850	115293	122429	114960	114850	296186	177228	223827	102079	100445	97240.8	141025	142363	142498	143568	112104	140749	211859	294348	131295	79863.6	103446	106961	145414	156024	144376	157032	145810	154750
met_6301	507.977	1.358	30.907	242.14	Unknown	Unknown	51103.9	13974.5	4807.67	78654.1	89297.1	97656.1	110198	117850	115293	122429	114960	114850	22368.1	1855.17	166492	102079	100445	97240.8	141025	142363	142498	143568	112104	140749	172799	36080.3	66563.7	79863.6	103446	106961	145414	156024	144376	157032	145810	154750
met_10664	364.912	1.359	22.672	178.88	Unknown	Unknown	3755.89	3545.9	11892.2	78654.1	89297.1	97656.1	110198	117850	115293	122429	114960	114850	2202.84	10355.2	4459.75	102079	100445	97240.8	141025	142363	142498	143568	112104	140749	14361.7	6317.43	5508.38	79863.6	103446	106961	145414	156024	144376	157032	145810	154750
met_170	473.017	1.359	25.692	201.33	Unknown	Unknown	1344439	1714655	1166618	78654.1	89297.1	97656.1	110198	117850	115293	122429	114960	114850	1938284	1253099	1398043	102079	100445	97240.8	141025	142363	142498	143568	112104	140749	1342728	1823824	1199456	79863.6	103446	106961	145414	156024	144376	157032	145810	154750
met_159	405.954	1.36	22.942	180.39	Unknown	Unknown	1905196	1518321	1859771	78654.1	89297.1	97656.1	110198	117850	115293	122429	114960	114850	1044583	715170	1818444	102079	100445	97240.8	141025	142363	142498	143568	112104	140749	1970102	1691369	2348853	79863.6	103446	106961	145414	156024	144376	157032	145810	154750
met_5844	318.04	1.361	20.901	165.6	Unknown	Unknown	7998.21	8309.73	6318.18	4899.53	2920.56	4095.66	8246.71	9925.53	11179.9	7959.96	5829.56	7985.44	9570.24	10532.4	8634.98	14050.2	3666.55	10650.5	10056.7	10049.6	10329.9	13074.7	8921.72	12374.6	9507.34	6838.78	6480.46	13629.9	8062.31	4788.28	8957.45	8436.26	7805.56	7245.62	8247.22	7961.73
met_630	662.973	1.361	29.958	233.21	Unknown	Unknown	336367	335479	307768	78654.1	89297.1	97656.1	110198	117850	115293	122429	114960	114850	362814	310395	361880	102079	100445	97240.8	141025	142363	142498	143568	112104	140749	313925	339871	314495	79863.6	103446	106961	145414	156024	144376	157032	145810	154750
met_233	461.066	1.362	25.472	199.74	Unknown	Unknown	973498	1194794	891248	78654.1	89297.1	97656.1	110198	117850	115293	122429	114960	114850	1275966	834644	1025614	102079	100445	97240.8	141025	142363	142498	143568	112104	140749	966054	1257327	885440	79863.6	103446	106961	145414	156024	144376	157032	145810	154750
met_5145	307.982	1.362	23.186	184.18	Unknown	Unknown	37758.6	25837.9	18693.8	78654.1	89297.1	97656.1	110198	117850	115293	122429	114960	114850	24500.3	14555.1	22333.4	102079	100445	97240.8	141025	142363	142498	143568	112104	140749	10526.2	15671.7	33446.2	79863.6	103446	106961	145414	156024	144376	157032	145810	154750
met_8539	239.013	1.364	20.071	161.03	Unknown	Unknown	136689	10335.6	7151.04	78654.1	89297.1	97656.1	110198	117850	115293	122429	114960	114850	10255.7	25814.4	3240.56	102079	100445	97240.8	141025	142363	142498	143568	112104	140749	172799	12608.9	3732.79	79863.6	103446	106961	145414	156024	144376	157032	145810	154750
met_8855	342.048	1.364	21.593	170.63	Unknown	Unknown	136689	15633.4	4313.5	78654.1	89297.1	97656.1	110198	117850	115293	122429	114960	114850	7407.56	16176.5	12877.6	102079	100445	97240.8	141025	142363	142498	143568	112104	140749	10946.4	201159	2285.55	79863.6	103446	106961	145414	156024	144376	157032	145810	154750
met_390	285.933	1.366	20.736	165.01	Unknown	Unknown	937589	381998	637212	78654.1	89297.1	97656.1	110198	117850	115293	122429	114960	114850	312257	160083	873116	102079	100445	97240.8	141025	142363	142498	143568	112104	140749	129928	330590	896531	79863.6	103446	106961	145414	156024	144376	157032	145810	154750
met_5442	259.026	1.366	19.041	152.04	Unknown	Unknown	6963.09	7377.91	4866.96	8706.12	3364.02	4365.73	11870	6601.47	9206.07	9581.07	7036.77	4586.73	8599.47	6485.95	2182.66	15564.1	5116.65	8223.47	8372.77	11605.5	9957.41	15969.5	8501.7	15224.2	7430.4	6263.81	6361.6	13200.9	4804.6	9592.8	9152.67	10726.5	5431.61	5592.95	6185.8	6519.55
met_46	532.029	1.372	26.862	209.92	Unknown	Unknown	5982210	6722518	5485739	78654.1	89297.1	97656.1	110198	117850	115293	122429	114960	114850	6895132	4539570	6274287	102079	100445	97240.8	141025	142363	142498	143568	112104	140749	5951416	7223930	5306681	79863.6	103446	106961	145414	156024	144376	157032	145810	154750
met_3265	245.896	1.374	20.979	168.19	Unknown	Unknown	8676.07	7600.62	94904.5	78654.1	571.151	97656.1	110198	117850	115293	122429	114960	114850	3087.22	70613.1	3950.71	102079	100445	97240.8	141025	142363	142498	143568	112104	140749	7203.77	97405.3	127493	79863.6	103446	106961	145414	156024	144376	157032	145810	154750
met_1467	383.055	1.376	23.01	181.25	Unknown	Unknown	74042.5	50612.9	126386	78654.1	89297.1	97656.1	110198	117850	115293	122429	114960	114850	52976.5	185707	76179.7	102079	100445	97240.8	141025	142363	142498	143568	112104	140749	68658.2	64758.6	61924.4	79863.6	103446	106961	145414	156024	144376	157032	145810	154750
met_4091	327.966	1.376	27.317	216.83	Unknown	Unknown	76252.9	25106.8	10606.5	78654.1	89297.1	97656.1	110198	117850	115293	122429	114960	114850	84604.4	9492.94	16035.3	102079	100445	97240.8	141025	142363	142498	143568	112104	140749	172799	10283.2	62282.6	79863.6	103446	106961	145414	156024	144376	157032	145810	154750
met_1465	327.933	1.38	23.749	188.21	Unknown	Unknown	26888.6	112588	155348	78654.1	89297.1	97656.1	110198	117850	115293	122429	114960	114850	29274	192419	138350	102079	100445	97240.8	141025	142363	142498	143568	112104	140749	103901	64974.6	32050.6	79863.6	103446	106961	145414	156024	144376	157032	145810	154750
met_254	398.884	1.385	21.687	170.48	Unknown	Unknown	270045	232762	236509	239002	353753	509119	300889	648169	290240	544753	257918	257388	301750	275244	332046	92941.8	48069.1	271783	503696	275736	838488	115873	415578	285643	308489	260351	262249	266171	42139.9	499806	265913	578961	411567	228246	275304	657498
met_8147	390.06	1.388	22.986	180.99	Unknown	Unknown	136689	155509	140098	8146.08	89297.1	3638.89	9718.49	5611.04	4604.28	4572.6	5008.68	114850	200928	174561	166492	14072.9	100445	97240.8	11890.3	142363	7833.7	8655.85	112104	9409.87	172799	201159	171479	3244.25	103446	106961	7082.42	3588.44	8671.88	5312.82	145810	6493.85
met_1536	281.024	1.398	21.545	171.66	Unknown	Unknown	111158	71875.4	40935.7	78654.1	89297.1	97656.1	110198	117850	115293	122429	114960	114850	157612	170879	55425.5	102079	100445	97240.8	141025	142363	142498	143568	112104	140749	120471	36991.2	47912.6	79863.6	103446	106961	145414	156024	144376	157032	145810	154750
met_1523	614.032	1.404	29.54	230.31	Unknown	Unknown	144622	89462.4	143966	78654.1	89297.1	97656.1	110198	117850	115293	122429	114960	114850	101818	143303	66967.7	102079	100445	97240.8	141025	142363	142498	143568	112104	140749	139874	122926	110904	79863.6	103446	106961	145414	156024	144376	157032	145810	154750
met_2195	307.983	1.41	20.038	158.87	Unknown	Unknown	49040.4	64397.2	89967.3	78654.1	89297.1	97656.1	110198	117850	115293	122429	114960	114850	75989.8	68566.7	57385.8	102079	100445	97240.8	141025	142363	142498	143568	112104	140749	20877.2	96252.2	36561.4	79863.6	103446	106961	145414	156024	144376	157032	145810	154750
met_91	363.918	1.41	21.091	166.28	Unknown	Unknown	2289399	1982281	2150345	219934	207566	240700	531810	743480	513912	116238	341994	571814	1503470	1630106	2166499	274055	184298	623419	719094	771037	662442	403684	127294	868595	2095067	1795725	2090624	488671	246343	66038.2	3017476	943672	944883	378658	896202	331474
met_880	401.045	1.415	23.782	187.14	Unknown	Unknown	257022	276297	224562	78654.1	89297.1	97656.1	110198	117850	115293	122429	114960	114850	260424	133062	248000	102079	100445	97240.8	141025	142363	142498	143568	112104	140749	241120	327601	258587	79863.6	103446	106961	145414	156024	144376	157032	145810	154750
met_2259	354.997	1.417	21.661	170.95	Unknown	Unknown	26326.2	28998	66703.5	78654.1	89297.1	97656.1	110198	117850	115293	122429	114960	114850	61324.8	67501.4	70138.9	102079	100445	97240.8	141025	142363	142498	143568	112104	140749	61635.2	62295.6	61058.9	79863.6	103446	106961	145414	156024	144376	157032	145810	154750
met_51	412.009	1.418	23.273	182.91	Unknown	Unknown	4325830	4716924	4193112	78654.1	89297.1	97656.1	110198	117850	115293	122429	114960	114850	4868605	4463189	4593479	102079	100445	97240.8	141025	142363	142498	18878.9	112104	140749	4282532	4549535	3919183	79863.6	103446	106961	145414	156024	144376	157032	145810	154750
met_2248	864.995	1.423	34.236	265.57	Unknown	Unknown	67994.4	87733.1	36645.7	78654.1	89297.1	97656.1	110198	117850	115293	122429	114960	114850	41792.8	187671	100523	102079	100445	97240.8	141025	142363	142498	143568	112104	140749	62735.7	18991.5	44846.1	79863.6	103446	106961	145414	156024	144376	157032	145810	154750
met_589	369.999	1.425	21.904	172.64	Unknown	Unknown	375559	384130	335544	78654.1	89297.1	97656.1	110198	117850	115293	122429	114960	114850	391822	375408	375619	102079	100445	97240.8	141025	142363	142498	143568	112104	140749	348174	364027	315152	79863.6	103446	106961	145414	156024	144376	157032	145810	154750
met_9361	252.965	1.431	21.546	172.53	Unknown	Unknown	9675.25	8749.52	10995.9	78654.1	89297.1	97656.1	110198	117850	115293	122429	114960	114850	12954.5	9137.85	166492	102079	100445	97240.8	141025	142363	142498	143568	112104	140749	4463.47	9239.17	5430.28	79863.6	103446	106961	145414	156024	144376	157032	145810	154750
met_345	352.996	1.438	21.702	171.33	Unknown	Unknown	512821	638272	482207	78654.1	89297.1	97656.1	110198	117850	115293	122429	114960	114850	756945	776875	564224	102079	100445	97240.8	141025	142363	142498	1690.96	112104	140749	503408	618643	441645	79863.6	103446	106961	145414	156024	144376	157032	145810	154750
met_902	410.013	1.438	23.256	182.82	Unknown	Unknown	244244	265940	240299	78654.1	89297.1	97656.1	110198	117850	115293	122429	114960	114850	245238	247438	259547	102079	100445	97240.8	141025	142363	142498	143568	112104	140749	128663	247546	206698	79863.6	103446	106961	145414	156024	144376	157032	145810	154750
met_3188	494.011	1.44	26.062	203.99	Unknown	Unknown	45843.4	40912.7	32432.6	78654.1	89297.1	97656.1	110198	117850	115293	122429	114960	114850	19882.9	95711.6	18211.6	102079	100445	97240.8	141025	142363	142498	143568	112104	140749	36966.3	25555	171479	79863.6	103446	106961	145414	156024	144376	157032	145810	154750
met_5227	367.915	1.444	21.045	165.83	Unknown	Unknown	136689	155509	140098	78654.1	89297.1	97656.1	11920	117850	6316.34	8640.54	114960	114850	200928	174561	166492	102079	100445	15926.5	9372.67	142363	22320.2	143568	112104	27259.4	172799	8586.72	171479	79863.6	103446	106961	26184.3	7891.54	33924.5	8858.56	145810	14232
met_4475	412.009	1.445	26.03	204.83	Unknown	Unknown	33388.7	63137.8	29182.9	78654.1	89297.1	97656.1	110198	117850	115293	122429	114960	114850	26940.8	31881.6	44654.9	102079	100445	97240.8	141025	142363	142498	143568	112104	140749	22349.5	13716	171479	79863.6	103446	106961	145414	156024	144376	157032	145810	154750
met_377	309.978	1.448	24.67	196.04	Unknown	Unknown	548910	598331	523352	78654.1	89297.1	97656.1	110198	117850	115293	122429	114960	114850	667501	683141	600651	102079	100445	97240.8	141025	142363	142498	143568	112104	140749	585067	401099	266982	79863.6	103446	106961	145414	156024	144376	157032	145810	154750
met_117	309.978	1.45	21.87	173.55	Unknown	Unknown	2094588	2254193	1857616	78654.1	89297.1	97656.1	110198	117850	115293	122429	114960	114850	2371440	2054734	2217471	102079	100445	97240.8	141025	142363	142498	4630.78	112104	140749	2042497	2213582	1878252	79863.6	103446	106961	145414	156024	144376	157032	145810	154750
met_206	309.977	1.45	23.197	184.2	Unknown	Unknown	1119190	1223510	1108060	78654.1	89297.1	97656.1	110198	117850	115293	122429	114960	114850	1268069	1178765	1201093	102079	100445	97240.8	141025	142363	142498	143568	112104	140749	1136466	1193922	1039349	79863.6	103446	106961	145414	156024	144376	157032	145810	154750
met_873	429.998	1.452	28.405	223.43	Unknown	Unknown	308380	109864	221977	78654.1	89297.1	97656.1	110198	117850	115293	122429	114960	114850	335246	186941	323390	102079	100445	97240.8	141025	142363	142498	143568	112104	140749	313011	240638	273507	79863.6	103446	106961	145414	156024	144376	157032	145810	154750
met_652	309.977	1.467	26.467	210.48	Unknown	Unknown	319604	299700	245987	78654.1	89297.1	97656.1	110198	117850	115293	122429	114960	114850	105247	473073	480497	102079	100445	97240.8	141025	142363	142498	143568	112104	140749	301278	191736	183343	79863.6	103446	106961	145414	156024	144376	157032	145810	154750
met_1946	250.964	1.47	21.609	173.1	Unknown	Unknown	43318.2	68768.1	35233.2	78654.1	89297.1	97656.1	110198	117850	115293	122429	114960	114850	154950	80956.9	137292	102079	100445	97240.8	141025	142363	142498	143568	112104	140749	127368	103364	70508.4	79863.6	103446	106961	145414	156024	144376	157032	145810	154750
met_2563	307.982	1.473	21.867	173.59	Unknown	Unknown	61524.2	29549.2	98443.9	78654.1	89297.1	97656.1	110198	117850	115293	122429	114960	114850	29580.1	79579.9	119445	102079	100445	97240.8	141025	142363	142498	143568	112104	140749	93255.3	39124	78866.5	79863.6	103446	106961	145414	156024	144376	157032	145810	154750
met_5811	304.906	1.475	19.18	152.04	Unknown	Unknown	10573.4	22534.4	48883.3	78654.1	89297.1	97656.1	110198	117850	115293	122429	114960	114850	49903.2	174561	14274.3	102079	100445	97240.8	141025	142363	142498	143568	2820.87	5888.67	13311.9	25250.8	171479	79863.6	103446	106961	145414	156024	144376	157032	145810	154750
met_854	237.091	1.483	19.608	157.35	Unknown	Unknown	76554	58835.5	98641.4	97659.8	80237	158985	96822.7	111099	51623.2	146403	81468.2	110613	89733	37722.7	57658.8	102079	186093	97571.4	83469.9	125004	120178	74003.4	76005.7	58675.7	224361	26590.1	84143.7	53934.6	186846	91396.6	98372.4	84629.5	95701.3	110267	150435	101918
met_612	542.952	1.485	26.615	207.87	Unknown	Unknown	381565	371704	355630	78654.1	89297.1	97656.1	110198	117850	115293	122429	114960	114850	384597	224086	399982	102079	100445	97240.8	141025	142363	142498	143568	112104	140749	286919	327781	329150	79863.6	103446	106961	2626.13	156024	144376	157032	145810	154750
met_7348	239.013	1.487	20.083	161.14	Unknown	Unknown	32875.8	6331.67	6165.09	78654.1	89297.1	97656.1	110198	117850	115293	122429	114960	114850	8782.64	5613.23	24547.2	102079	100445	97240.8	141025	142363	142498	143568	112104	140749	10904.4	15096.5	16580.8	79863.6	103446	106961	145414	156024	144376	157032	145810	154750
met_3307	716.913	1.49	29.586	229.93	Unknown	Unknown	25551.8	36114.5	23221.5	78654.1	89297.1	97656.1	110198	117850	115293	122429	114960	114850	29370.8	65248.1	12996.5	102079	100445	97240.8	141025	142363	142498	143568	112104	140749	31090	19272.3	17730.1	79863.6	103446	106961	145414	156024	144376	157032	145810	154750
met_10168	387.237	1.506	24.371	192.06	Unknown	Unknown	136689	155509	6446.16	78654.1	89297.1	97656.1	110198	1717.05	115293	3590.79	3001.59	114850	5094.56	3401.46	6659.83	102079	100445	97240.8	141025	142363	142498	5655.5	3321.36	3583.6	4708.89	6964.99	5023.72	79863.6	103446	106961	2882.35	3585.29	5332.5	157032	145810	6139.85
met_1462	624.954	1.512	27.911	217.4	Unknown	Unknown	75030.3	113530	113530	78654.1	89297.1	97656.1	110198	117850	115293	122429	114960	114850	98745.9	221570	122611	102079	100445	97240.8	141025	142363	142498	143568	112104	140749	82792.2	76140.2	75128.6	79863.6	103446	106961	145414	156024	144376	157032	145810	154750
met_3523	320.899	1.514	21.513	170.44	Unknown	Unknown	22113.3	19340.9	27334.6	27306.3	23680.1	20799.7	21051.7	20442.9	21683.5	17967.1	10676.2	16877.4	23736.3	23739.7	22134.9	19555.5	26436.2	28135.9	22433.1	14732.6	21166.1	22048.6	25222.8	25896.8	22110.6	26922.3	21311.2	17999	22255.2	13466.5	17710.3	27003.3	23932.6	20086.9	20704.8	19103.3
met_1212	387.954	1.518	23.821	187.65	Unknown	Unknown	151088	196434	52361.8	78654.1	89297.1	97656.1	110198	117850	115293	122429	114960	114850	239920	214160	183190	102079	100445	97240.8	141025	142363	142498	143568	112104	140749	175262	179072	165326	79863.6	103446	106961	145414	156024	144376	157032	145810	154750
met_3461	261.037	1.519	25.91	207.61	Unknown	Unknown	22816.9	29383.8	57776.4	78654.1	89297.1	97656.1	110198	117850	115293	122429	114960	114850	69728.8	48347.3	64291	102079	100445	97240.8	141025	142363	142498	143568	112104	140749	45186.9	61053.9	47366.6	79863.6	103446	106961	145414	156024	144376	157032	145810	154750
met_718	480.886	1.538	23.362	182.8	Unknown	Unknown	48242.3	30323.7	47760.6	43274.9	120475	346384	43266	71178.2	50130.3	105318	52872.1	56436.8	42202.5	40649.6	52832.7	59424.8	59118.6	94320	54709.9	34464.3	296568	95817.9	41131.3	56368.4	53459.6	36420.2	48075.2	205153	75272.6	266491	54757.6	66432.1	48577.7	393026	131139	74907.6
met_3657	321.978	1.552	20.307	160.75	Unknown	Unknown	136689	17561.7	24711.5	78654.1	89297.1	97656.1	110198	117850	115293	122429	114960	114850	49001.1	15136.1	116826	102079	100445	97240.8	141025	142363	142498	143568	112104	140749	17274.2	45069.1	83832.2	79863.6	103446	106961	145414	156024	144376	157032	145810	154750
met_8550	316.992	1.596	20.376	161.39	Unknown	Unknown	5721.31	7998.55	16362.7	78654.1	89297.1	97656.1	110198	117850	115293	122429	114960	114850	5317.11	4603.46	3404.58	102079	100445	97240.8	141025	142363	142498	143568	5266.02	140749	26534	201159	171479	79863.6	103446	106961	145414	156024	144376	157032	145810	154750
met_70	422.931	1.6	23.018	180.74	Unknown	Unknown	629227	549795	632954	591564	908347	532193	666834	109205	802462	477196	969036	2615151	750917	1117423	707766	635443	129375	914577	258827	911793	2277092	654165	671266	1004493	544490	499367	465215	491093	1.48549e+06	857635	5305129	796979	39946.5	1.83502e+06	972378	897441
met_2040	451.842	1.604	24.681	193.55	Unknown	Unknown	27228.4	23038.1	22775.5	28846.9	42872.9	45875.8	18134.2	22013.6	75387.2	24430.9	24937	17442.1	25733	24085.1	29404.1	26882.6	38627.2	34352.7	32402.3	28377.4	29153.5	32892.5	26614.4	38264.8	33733.5	20029.1	36192.1	40175	40814.7	36438.3	48869.2	27486.7	24720.4	36798.2	19163.1	41118.3
met_3074	339.952	1.617	20.712	163.63	Unknown	Unknown	32920	26393.5	59235.7	78654.1	89297.1	97656.1	110198	117850	115293	122429	114960	114850	60783.5	56136	67146.9	102079	100445	97240.8	141025	142363	142498	143568	112104	140749	172799	24932.3	55377.8	79863.6	103446	106961	145414	156024	144376	157032	145810	154750
met_48	309.978	1.617	20.047	158.89	Unknown	Unknown	5698283	5124113	5364497	78654.1	89297.1	97656.1	110198	117850	115293	122429	114960	114850	5298834	4510670	5619256	102079	100445	97240.8	141025	142363	142498	1082534	112104	140749	5441030	5423694	5586684	79863.6	103446	106961	14515.6	156024	144376	157032	145810	154750
met_1419	281.024	1.62	19.577	155.78	Unknown	Unknown	161160	75691.4	149800	78654.1	89297.1	97656.1	110198	117850	115293	122429	114960	114850	136514	76831.8	72952.3	102079	100445	97240.8	141025	142363	142498	143568	112104	140749	124755	176953	109598	79863.6	103446	106961	145414	156024	144376	157032	145810	154750
met_2354	522.922	1.646	25.027	195.52	Unknown	Unknown	49669.8	48770.2	47186.6	78654.1	89297.1	97656.1	110198	117850	115293	122429	114960	114850	45309.3	23422.2	59490	102079	100445	97240.8	141025	142363	142498	143568	112104	140749	47690.6	40240.1	44706.2	79863.6	103446	106961	145414	156024	144376	157032	145810	154750
met_6842	444.014	1.658	24.552	192.66	Unknown	Unknown	21789.5	25861.4	140098	78654.1	89297.1	97656.1	110198	117850	115293	122429	114960	114850	15703.5	7066.54	24509.1	102079	100445	97240.8	141025	142363	142498	143568	112104	140749	23059.4	25269.6	22659.7	79863.6	103446	106961	145414	156024	144376	157032	145810	154750
met_125	363.918	1.659	21.09	166.26	Unknown	Unknown	239984	191644	265611	4414712	474056	154409	3918980	1069306	341944	224748	393443	377958	428181	491346	215672	146588	80598.4	244326	575564	532962	2024015	239458	450525	517765	519848	313164	561673	193272	427825	117302	588519	789307	498071	721813	753011	194460
met_5682	234.992	1.664	20.294	163.01	Unknown	Unknown	12574	25984.8	14163	78654.1	89297.1	97656.1	110198	117850	115293	122429	114960	114850	15260.1	18367.9	25272.2	102079	100445	97240.8	141025	142363	142498	143568	112104	140749	28570.7	19148.8	16249.4	79863.6	103446	106961	145414	156024	144376	157032	145810	154750
met_8517	415.982	1.669	24.114	189.55	Unknown	Unknown	12761.4	11149.1	13262.7	78654.1	89297.1	97656.1	110198	117850	115293	122429	114960	114850	10270.5	13252	10648.4	102079	100445	97240.8	141025	142363	142498	143568	112104	140749	17419.9	201159	171479	79863.6	103446	106961	145414	156024	144376	157032	145810	154750
met_7040	327.967	1.672	28.37	225.27	Unknown	Unknown	41750.5	155509	2755.78	78654.1	89297.1	97656.1	110198	117850	115293	122429	114960	114850	4114.37	44718.3	7012.82	102079	100445	97240.8	141025	142363	142498	143568	112104	140749	19807.2	4319.68	19163.9	79863.6	103446	106961	145414	156024	144376	157032	145810	154750
met_1940	458.91	1.675	24.691	193.58	Unknown	Unknown	103632	74825.8	79583.5	78654.1	89297.1	97656.1	110198	117850	115293	122429	114960	114850	73255.8	76239.9	88703.6	102079	100445	97240.8	141025	142363	142498	143568	112104	140749	76547.5	71801.5	91927	79863.6	103446	106961	145414	156024	144376	157032	145810	154750
met_11692	328.97	1.677	27.347	217.05	Unknown	Unknown	3090.11	155509	3972.11	78654.1	89297.1	97656.1	110198	117850	115293	122429	114960	114850	2544.91	174561	2758.73	102079	100445	97240.8	141025	142363	142498	143568	112104	140749	12723	17654	4998.9	79863.6	103446	106961	145414	156024	144376	157032	145810	154750
met_7462	327.967	1.679	24.495	194.21	Unknown	Unknown	136689	2854.01	4112.27	78654.1	89297.1	97656.1	110198	117850	115293	122429	114960	114850	12851.2	50893.3	8051.05	102079	100445	97240.8	141025	142363	142498	143568	112104	140749	3097.96	201159	3475.82	79863.6	103446	106961	145414	156024	144376	157032	145810	154750
met_7642	327.966	1.681	30.024	238.51	Unknown	Unknown	2485.51	13562.4	38213.3	78654.1	89297.1	97656.1	110198	117850	115293	122429	114960	114850	16406	17282.5	18533.2	102079	100445	97240.8	141025	142363	142498	143568	112104	140749	10912.5	3445.06	3202.38	79863.6	103446	106961	145414	156024	144376	157032	145810	154750
met_9446	503.998	1.685	25.058	195.95	Unknown	Unknown	136689	9053.41	8763.28	78654.1	89297.1	97656.1	110198	117850	115293	122429	114960	114850	10238.3	7756.78	5819.35	102079	100445	97240.8	141025	142363	142498	143568	112104	140749	172799	5900.52	10497.5	79863.6	103446	106961	145414	156024	144376	157032	145810	154750
met_5731	281.982	1.688	19.059	151.59	Unknown	Unknown	21851	24596.8	20492.9	78654.1	89297.1	97656.1	110198	117850	115293	122429	114960	114850	15963.7	23044.4	166492	102079	100445	97240.8	141025	142363	142498	6854.01	112104	140749	19359.5	19570.1	18472.4	79863.6	103446	106961	145414	156024	144376	157032	145810	154750
met_2249	327.966	1.689	22.893	181.37	Unknown	Unknown	39183.3	66004.5	57665.7	78654.1	89297.1	97656.1	110198	117850	115293	122429	114960	114850	95675.4	73326.4	52369.4	102079	100445	97240.8	141025	142363	142498	143568	1491.98	140749	86284.5	75079.6	59551.7	79863.6	103446	106961	145414	156024	144376	157032	145810	154750
met_892	307.982	1.69	20.049	158.98	Unknown	Unknown	136689	186446	221565	78654.1	89297.1	97656.1	110198	117850	115293	122429	114960	114850	159866	194976	242491	102079	100445	97240.8	6854.76	9847.28	7713.26	47894.7	56799.8	25171.4	258823	206568	263833	79863.6	103446	106961	18643.6	156024	144376	157032	145810	154750
met_555	440.92	1.692	23.79	186.65	Unknown	Unknown	272871	251867	291770	144769	175822	134764	118799	108583	106885	110221	103544	114139	245092	175194	308138	137668	158050	127340	14515	18636.3	10315.8	109336	103460	47818.3	251131	255010	268266	142725	142624	176772	32144.7	117147	4150.18	142136	116765	138571
met_5996	289.035	1.696	21.905	174.36	Unknown	Unknown	16573.9	18813.4	25338.5	78654.1	89297.1	97656.1	110198	117850	115293	122429	114960	114850	12403.4	22256.9	24351.4	102079	100445	97240.8	141025	142363	142498	143568	112104	140749	17051.7	23375.8	14873.1	79863.6	103446	106961	145414	156024	144376	157032	145810	154750
met_1503	331.045	1.704	21.935	173.6	Unknown	Unknown	100357	99426.9	112506	78654.1	89297.1	97656.1	110198	117850	115293	122429	114960	114850	112825	93584.2	97191.4	102079	100445	97240.8	141025	142363	142498	143568	112104	140749	115074	107806	92996.9	79863.6	103446	106961	145414	156024	144376	157032	145810	154750
met_1163	521.988	1.705	25.943	202.77	Unknown	Unknown	137682	123938	146676	78654.1	89297.1	97656.1	110198	117850	115293	122429	114960	114850	116818	125633	149775	102079	100445	97240.8	141025	142363	142498	143568	112104	140749	136238	150944	156496	79863.6	103446	106961	145414	156024	144376	157032	145810	154750
met_4130	497.945	1.705	24.429	191.07	Unknown	Unknown	28931.1	20964.1	61451.3	78654.1	89297.1	97656.1	110198	117850	115293	122429	114960	114850	12607.2	21712.8	38331.7	102079	100445	97240.8	141025	142363	142498	143568	112104	1690.34	37592.2	27286.6	41627	79863.6	103446	106961	145414	156024	144376	157032	145810	154750
met_2946	327.967	1.706	28.472	226.1	Unknown	Unknown	11447.7	60284.5	68831	78654.1	89297.1	97656.1	110198	117850	115293	122429	114960	114850	102481	5725.68	83817.5	102079	100445	97240.8	141025	142363	142498	143568	112104	140749	31572.2	27554	60707.9	79863.6	103446	106961	145414	156024	144376	157032	145810	154750
met_2460	481.991	1.71	24.938	195.26	Unknown	Unknown	73599.9	60514.2	63705.4	78654.1	89297.1	97656.1	110198	117850	115293	122429	114960	114850	75086.9	53173.7	57174.5	102079	100445	97240.8	141025	142363	142498	143568	112104	140749	53488.8	67901.8	59743.9	79863.6	103446	106961	145414	156024	144376	157032	145810	154750
met_2458	419.992	1.711	23.629	185.63	Unknown	Unknown	75962.4	62246.8	66101.7	78654.1	89297.1	97656.1	110198	117850	115293	122429	114960	114850	45942.8	47476	56703.2	102079	100445	97240.8	141025	142363	142498	143568	112104	140749	54936	65555.1	74816.1	79863.6	103446	106961	145414	156024	144376	157032	145810	154750
met_3434	272.032	1.711	28.486	228.01	Unknown	Unknown	58674.1	28970.9	87133.6	78654.1	89297.1	97656.1	110198	117850	115293	122429	114960	114850	22802	51980	166492	102079	100445	97240.8	141025	142363	142498	143568	112104	140749	45898.1	56378.2	171479	79863.6	103446	106961	145414	156024	144376	157032	145810	154750
met_4461	272.032	1.711	31.863	255.32	Unknown	Unknown	28020.4	35501.1	48548.3	78654.1	89297.1	97656.1	110198	117850	115293	122429	114960	114850	25377.7	33981.8	166492	102079	100445	97240.8	141025	142363	142498	143568	112104	140749	31764	39355.3	65874.8	79863.6	103446	106961	145414	156024	144376	157032	145810	154750
met_5969	327.967	1.711	27.745	220.28	Unknown	Unknown	22326.4	22109.1	15951.9	78654.1	89297.1	97656.1	110198	117850	115293	122429	114960	114850	6873.11	11858.3	29381.4	102079	100445	97240.8	141025	142363	142498	143568	112104	140749	172799	24632	26323.7	79863.6	103446	106961	145414	156024	144376	157032	145810	154750
met_1337	417.978	1.712	24.08	189.24	Unknown	Unknown	142719	119135	141772	78654.1	89297.1	97656.1	110198	117850	115293	122429	114960	114850	115650	96299.7	130077	102079	100445	97240.8	141025	142363	142498	143568	112104	140749	140569	133869	106579	79863.6	103446	106961	145414	156024	144376	157032	145810	154750
met_4753	272.032	1.712	29.958	239.91	Unknown	Unknown	15246.2	21985.2	78451.5	78654.1	89297.1	97656.1	110198	117850	115293	122429	114960	114850	37179.6	48577.7	166492	102079	100445	97240.8	141025	142363	142498	143568	112104	140749	44209.2	28774.8	171479	79863.6	103446	106961	145414	156024	144376	157032	145810	154750
met_6657	272.032	1.712	33.848	271.36	Unknown	Unknown	13795.8	17872.4	21588	78654.1	89297.1	97656.1	110198	117850	115293	122429	114960	114850	22651	21604.4	18580.8	102079	100445	97240.8	141025	142363	142498	143568	112104	140749	11789.2	16724.5	13018.7	79863.6	103446	106961	145414	156024	144376	157032	145810	154750
met_705	479.977	1.712	23.896	187.01	Unknown	Unknown	266128	255667	287441	78654.1	89297.1	97656.1	110198	117850	115293	122429	114960	114850	219816	239766	278048	102079	100445	97240.8	141025	142363	142498	143568	112104	140749	293544	277069	281708	79863.6	103446	106961	145414	156024	144376	157032	145810	154750
met_1810	229.972	1.713	19.265	154.81	Unknown	Unknown	20487	26240.8	28687.5	34884.3	29857.9	21120.3	29678.1	27023.9	39993.4	24148	38600.2	32624.7	29733	31467.1	38241.7	53291.5	50994.3	38283.8	16149.6	50814.4	25257.4	22337.5	20437	26006.6	32873.3	32105.2	21967.9	30422	41780.7	27806.2	33614.7	23627.8	56386.3	13954.9	42288.9	40049.1
met_486	467.976	1.713	24.795	194.27	Unknown	Unknown	350489	322727	389165	78654.1	89297.1	97656.1	110198	117850	115293	122429	114960	114850	367309	314168	457573	102079	100445	97240.8	141025	142363	142498	143568	112104	140749	334968	418020	379454	79863.6	103446	106961	145414	156024	144376	157032	145810	154750
met_89	272.032	1.713	19.022	151.52	Unknown	Unknown	2245897	2172732	2326549	78654.1	89297.1	97656.1	110198	117850	115293	122429	114960	114850	2038261	2007383	2194055	102079	100445	97240.8	141025	142363	142498	143568	112104	140749	2599063	2576357	2549890	79863.6	103446	106961	145414	156024	144376	157032	145810	154750
met_1312	419.993	1.714	24.395	191.72	Unknown	Unknown	114524	120582	130069	78654.1	89297.1	97656.1	110198	117850	115293	122429	114960	114850	109730	104406	125754	102079	100445	97240.8	141025	142363	142498	143568	112104	140749	141464	129857	143104	79863.6	103446	106961	145414	156024	144376	157032	145810	154750
met_1413	597.983	1.714	30.324	236.64	Unknown	Unknown	189668	89881.4	95404	78654.1	89297.1	97656.1	110198	117850	115293	122429	114960	114850	76634.6	75468.9	113853	102079	100445	97240.8	141025	142363	142498	143568	112104	140749	127142	125232	126862	79863.6	103446	106961	145414	156024	144376	157032	145810	154750
met_2465	597.983	1.714	31.049	242.33	Unknown	Unknown	136689	65739.3	90794.3	78654.1	89297.1	97656.1	110198	117850	115293	122429	114960	114850	60673.1	65925.9	59474.3	102079	100445	97240.8	141025	142363	142498	143568	112104	140749	91387.4	79094.7	109165	79863.6	103446	106961	145414	156024	144376	157032	145810	154750
met_4959	325.971	1.714	21.698	171.82	Unknown	Unknown	35450.1	18070.8	29273.1	78654.1	89297.1	97656.1	110198	117850	115293	122429	114960	114850	13569.6	42416.4	166492	102079	100445	97240.8	141025	142363	142498	143568	112104	140749	31623.7	13976	39463.8	79863.6	103446	106961	145414	156024	144376	157032	145810	154750
met_1655	847.885	1.715	33.838	262.55	Unknown	Unknown	112740	82779.9	95488.8	78654.1	89297.1	97656.1	110198	117850	115293	122429	114960	114850	85534.7	77100.1	114186	102079	100445	97240.8	141025	142363	142498	143568	112104	140749	107064	91389.8	137936	79863.6	103446	106961	145414	156024	144376	157032	145810	154750
met_2338	621.98	1.715	28.583	222.71	Unknown	Unknown	69401.3	51506.7	75761.9	78654.1	89297.1	97656.1	110198	117850	115293	122429	114960	114850	66610.2	70718.1	61617.6	102079	100445	97240.8	141025	142363	142498	143568	112104	140749	71053.9	65462.1	73982.8	79863.6	103446	106961	145414	156024	144376	157032	145810	154750
met_3143	554.886	1.715	26.349	205.68	Unknown	Unknown	53155	29765.4	61591.7	78654.1	89297.1	97656.1	110198	117850	115293	122429	114960	114850	27326.1	24614.1	54603.5	102079	100445	97240.8	141025	142363	142498	143568	112104	140749	58821.2	15905.1	75588.9	79863.6	103446	106961	145414	156024	144376	157032	145810	154750
met_7103	325.971	1.716	25.639	203.42	Unknown	Unknown	136689	15543	17477.2	78654.1	89297.1	97656.1	110198	117850	115293	122429	114960	114850	23475.5	174561	17403.7	102079	100445	97240.8	141025	142363	142498	143568	112104	140749	13409.5	10809.2	12508.9	79863.6	103446	106961	145414	156024	144376	157032	145810	154750
met_1194	363.944	1.718	21.717	171.27	Unknown	Unknown	210147	155509	140553	78654.1	89297.1	97656.1	110198	117850	115293	122429	114960	114850	74974.7	48004.4	193579	102079	100445	97240.8	141025	142363	142498	143568	112104	140749	172799	95700.1	427610	79863.6	103446	106961	145414	156024	144376	157032	145810	154750
met_2000	433.972	1.718	23.757	186.46	Unknown	Unknown	88374.6	66761.5	89256.8	78654.1	89297.1	97656.1	110198	117850	115293	122429	114960	114850	54207.9	54811.8	84089.9	102079	100445	97240.8	141025	142363	142498	143568	112104	140749	66214.4	100668	82013.2	79863.6	103446	106961	145414	156024	144376	157032	145810	154750
met_3410	553.992	1.718	27.148	211.98	Unknown	Unknown	68474.4	24439.5	75036	78654.1	89297.1	97656.1	110198	117850	115293	122429	114960	114850	33400.9	60433.2	61517.2	102079	100445	97240.8	141025	142363	142498	143568	112104	140749	47466.4	24862.1	171479	79863.6	103446	106961	145414	156024	144376	157032	145810	154750
met_1939	493.993	1.719	26.151	204.7	Unknown	Unknown	73410	70650.4	63285.6	78654.1	89297.1	97656.1	110198	117850	115293	122429	114960	114850	73639.1	55481.5	83448.4	102079	100445	97240.8	141025	142363	142498	143568	112104	140749	123662	69029.9	88408.2	79863.6	103446	106961	145414	156024	144376	157032	145810	154750
met_6621	283.977	1.719	20.283	161.42	Unknown	Unknown	16936.6	16322.9	13534	78654.1	89297.1	97656.1	110198	117850	115293	122429	114960	114850	14400	16963.8	18276	102079	100445	97240.8	141025	142363	142498	143568	112104	140749	19492.9	14425.6	26307.3	79863.6	103446	106961	145414	156024	144376	157032	145810	154750
met_7693	431.037	1.719	26.243	206.23	Unknown	Unknown	9422.23	14175.2	140098	78654.1	89297.1	97656.1	110198	117850	115293	122429	114960	114850	7489.39	16361.8	16198.3	102079	100445	97240.8	141025	142363	142498	143568	112104	140749	20750.8	10448.9	1544.23	79863.6	103446	106961	145414	156024	144376	157032	145810	154750
met_856	327.967	1.719	27.015	214.4	Unknown	Unknown	277724	269766	198071	78654.1	89297.1	97656.1	110198	117850	115293	122429	114960	114850	115174	79283.7	337726	102079	100445	97240.8	141025	142363	142498	143568	112104	140749	169238	176088	267307	79863.6	103446	106961	145414	156024	144376	157032	145810	154750
met_1284	597.984	1.72	27.613	215.28	Unknown	Unknown	108149	134734	157047	78654.1	89297.1	97656.1	110198	117850	115293	122429	114960	114850	100546	126032	122321	102079	100445	97240.8	141025	142363	142498	143568	112104	140749	172770	180316	140844	79863.6	103446	106961	145414	156024	144376	157032	145810	154750
met_2062	627.989	1.72	29.68	231.3	Unknown	Unknown	93599.2	50779.4	85112.2	78654.1	89297.1	97656.1	110198	117850	115293	122429	114960	114850	59167.6	54219.2	86385.6	102079	100445	97240.8	141025	142363	142498	143568	112104	140749	80861.6	82759.2	105714	79863.6	103446	106961	145414	156024	144376	157032	145810	154750
met_6821	556.008	1.72	30.075	235.05	Unknown	Unknown	16389.5	12924.6	20277.6	78654.1	89297.1	97656.1	110198	117850	115293	122429	114960	114850	19818.3	14352.8	13578.6	102079	100445	97240.8	141025	142363	142498	143568	112104	140749	11324.5	20413.6	16836.9	79863.6	103446	106961	145414	156024	144376	157032	145810	154750
met_9245	227.034	1.72	20.168	162.28	Mevalonate-P, [M-H]1-	Unknown	16584.4	9326.5	11989	78654.1	89297.1	97656.1	110198	117850	115293	122429	114960	114850	5456.66	11258.4	3133.35	102079	100445	97240.8	141025	142363	142498	143568	112104	140749	3974.75	8696.54	171479	79863.6	103446	106961	145414	156024	144376	157032	145810	154750
met_1617	659.949	1.721	30.612	238.4	Unknown	Unknown	141996	77722.2	84269.1	78654.1	89297.1	97656.1	110198	117850	115293	122429	114960	114850	78975.8	76452.1	118226	102079	100445	97240.8	141025	142363	142498	143568	112104	140749	101860	71797.8	139729	79863.6	103446	106961	145414	156024	144376	157032	145810	154750
met_261	463.983	1.721	24.112	188.9	Unknown	Unknown	820451	686323	792911	78654.1	89297.1	97656.1	110198	117850	115293	122429	114960	114850	642767	598069	793882	102079	100445	97240.8	141025	142363	142498	143568	112104	140749	868060	775413	914597	79863.6	103446	106961	145414	156024	144376	157032	145810	154750
met_6285	625.998	1.722	30.48	237.6	Unknown	Unknown	26972.2	22850.6	25255.6	78654.1	89297.1	97656.1	110198	117850	115293	122429	114960	114850	19771.7	20671.3	166492	102079	100445	97240.8	141025	142363	142498	143568	112104	140749	23565.9	201159	21633.5	79863.6	103446	106961	145414	156024	144376	157032	145810	154750
met_758	678.923	1.722	29.658	230.74	Unknown	Unknown	226652	225345	263058	78654.1	89297.1	97656.1	110198	117850	115293	122429	114960	114850	206955	190943	260808	102079	100445	97240.8	141025	142363	142498	143568	112104	140749	281479	262440	316923	79863.6	103446	106961	145414	156024	144376	157032	145810	154750
met_7751	273.038	1.722	29.153	233.35	Unknown	Unknown	136689	11485.6	17602.2	78654.1	89297.1	97656.1	110198	117850	115293	122429	114960	114850	22808.5	10672.4	24916.1	102079	100445	97240.8	141025	142363	142498	143568	112104	140749	6785.46	14993.1	171479	79863.6	103446	106961	145414	156024	144376	157032	145810	154750
met_8621	327.966	1.722	32.381	257.43	Unknown	Unknown	7138.52	155509	19291.1	78654.1	89297.1	97656.1	110198	117850	115293	122429	114960	114850	6785.08	2847.1	8963.85	102079	100445	97240.8	141025	142363	142498	143568	112104	140749	9288.68	3040.97	20748.3	79863.6	103446	106961	145414	156024	144376	157032	145810	154750
met_896	357.941	1.722	21.172	167	Unknown	Unknown	190164	208472	179389	78654.1	89297.1	97656.1	110198	117850	115293	122429	114960	114850	167525	169433	199668	102079	100445	97240.8	141025	142363	142498	143568	112104	140749	229682	208316	229635	79863.6	103446	106961	145414	156024	144376	157032	145810	154750
met_1071	259.06	1.723	19.686	157.26	Unknown	Unknown	79588.5	192139	209052	78654.1	89297.1	97656.1	110198	117850	115293	122429	114960	114850	206885	147829	148480	102079	100445	97240.8	141025	142363	142498	143568	112104	140749	250131	112562	154989	79863.6	103446	106961	145414	156024	144376	157032	145810	154750
met_2861	661.947	1.723	30.627	238.5	Unknown	Unknown	66435.4	45476.9	59248.5	78654.1	89297.1	97656.1	110198	117850	115293	122429	114960	114850	38253	45110	42763.1	102079	100445	97240.8	141025	142363	142498	143568	112104	140749	46044.5	53368.8	65002.8	79863.6	103446	106961	145414	156024	144376	157032	145810	154750
met_3144	603.992	1.723	30.44	237.48	Unknown	Unknown	49216.3	45730.7	38602.9	78654.1	89297.1	97656.1	110198	117850	115293	122429	114960	114850	55625.7	43183.2	38763.2	102079	100445	97240.8	141025	142363	142498	143568	112104	140749	53127.5	51699.8	54376.7	79863.6	103446	106961	145414	156024	144376	157032	145810	154750
met_1076	433.972	1.724	24.59	193.07	Unknown	Unknown	181229	134166	171179	78654.1	89297.1	97656.1	110198	117850	115293	122429	114960	114850	133178	137133	188549	102079	100445	97240.8	141025	142363	142498	143568	112104	140749	176760	172150	195906	79863.6	103446	106961	145414	156024	144376	157032	145810	154750
met_1094	599.998	1.724	27.63	215.4	Unknown	Unknown	185003	145242	168586	78654.1	89297.1	97656.1	110198	117850	115293	122429	114960	114850	127143	120762	152396	102079	100445	97240.8	141025	142363	142498	143568	112104	140749	191896	193305	234237	79863.6	103446	106961	145414	156024	144376	157032	145810	154750
met_1311	641.976	1.724	30.578	238.24	Unknown	Unknown	132245	111821	149035	78654.1	89297.1	97656.1	110198	117850	115293	122429	114960	114850	111353	108385	130331	102079	100445	97240.8	141025	142363	142498	143568	112104	140749	148515	145911	154430	79863.6	103446	106961	145414	156024	144376	157032	145810	154750
met_1325	615.993	1.724	28.96	225.73	Unknown	Unknown	161612	105281	137221	78654.1	89297.1	97656.1	110198	117850	115293	122429	114960	114850	115012	112968	112202	102079	100445	97240.8	141025	142363	142498	143568	112104	140749	129194	162148	146820	79863.6	103446	106961	145414	156024	144376	157032	145810	154750
met_3194	287.055	1.724	20.863	166	Unknown	Unknown	56152.1	53060.5	48360.4	78654.1	89297.1	97656.1	110198	117850	115293	122429	114960	114850	30750.1	45534.3	39933.4	102079	100445	97240.8	141025	142363	142498	143568	112104	140749	60130.6	49394.2	45877.6	79863.6	103446	106961	145414	156024	144376	157032	145810	154750
met_1017	435.056	1.725	26.177	205.66	Unknown	Unknown	168355	192916	140098	78654.1	89297.1	97656.1	110198	117850	115293	122429	114960	114850	162181	163848	189907	102079	100445	97240.8	141025	142363	142498	143568	112104	140749	232170	196469	258208	79863.6	103446	106961	145414	156024	144376	157032	145810	154750
met_2411	616.885	1.725	28.421	221.49	Unknown	Unknown	84536.1	62859.9	96088.6	78654.1	89297.1	97656.1	110198	117850	115293	122429	114960	114850	59795.7	174561	53371.2	102079	100445	97240.8	141025	142363	142498	143568	112104	140749	57430.5	64429.2	68214.1	79863.6	103446	106961	145414	156024	144376	157032	145810	154750
met_526	363.05	1.726	22.74	179.44	Unknown	Unknown	361303	347419	402559	78654.1	89297.1	97656.1	110198	117850	115293	122429	114960	114850	316019	306640	385073	102079	100445	97240.8	141025	142363	142498	143568	112104	140749	371511	403592	404430	79863.6	103446	106961	145414	156024	144376	157032	145810	154750
met_772	792.957	1.726	32.894	255.43	Unknown	Unknown	262361	209828	257731	78654.1	89297.1	97656.1	110198	117850	115293	122429	114960	114850	207224	175184	257739	102079	100445	97240.8	141025	142363	142498	143568	112104	140749	302284	264047	322698	79863.6	103446	106961	145414	156024	144376	157032	145810	154750
met_986	425.05	1.726	24.154	189.74	Unknown	Unknown	182140	173021	216065	78654.1	89297.1	97656.1	110198	117850	115293	122429	114960	114850	126675	139086	162475	102079	100445	97240.8	141025	142363	142498	143568	112104	140749	242405	204127	195034	79863.6	103446	106961	145414	156024	144376	157032	145810	154750
met_3180	397.055	1.727	23.513	185.07	Unknown	Unknown	52539.2	51406.6	48207.7	78654.1	89297.1	97656.1	110198	117850	115293	122429	114960	114850	22904.5	174561	38932.5	102079	100445	97240.8	141025	142363	142498	143568	112104	140749	39606.8	72185.9	61706.8	79863.6	103446	106961	145414	156024	144376	157032	145810	154750
met_544	407.04	1.727	23.632	185.84	Unknown	Unknown	362153	310731	384668	78654.1	89297.1	97656.1	110198	117850	115293	122429	114960	114850	323859	275746	347432	102079	100445	97240.8	141025	142363	142498	143568	112104	140749	414745	420682	422898	79863.6	103446	106961	145414	156024	144376	157032	145810	154750
met_691	479.977	1.727	25.266	197.86	Unknown	Unknown	317040	232853	258776	78654.1	89297.1	97656.1	110198	117850	115293	122429	114960	114850	233053	201176	271527	102079	100445	97240.8	141025	142363	142498	143568	112104	140749	326324	310522	308220	79863.6	103446	106961	145414	156024	144376	157032	145810	154750
met_3267	615.993	1.728	30.884	240.89	Unknown	Unknown	45213.2	39806.9	54324.8	78654.1	89297.1	97656.1	110198	117850	115293	122429	114960	114850	38895.7	20732.8	19788	102079	100445	97240.8	141025	142363	142498	143568	112104	140749	61153.6	63430.7	70680.8	79863.6	103446	106961	145414	156024	144376	157032	145810	154750
met_284	327.967	1.729	25.665	203.57	Unknown	Unknown	742112	580573	769357	78654.1	89297.1	97656.1	110198	117850	115293	122429	114960	114850	630436	612600	653003	102079	100445	97240.8	141025	142363	142498	143568	112104	140749	749892	729977	853849	79863.6	103446	106961	145414	156024	144376	157032	145810	154750
met_3196	439.065	1.729	24.682	193.76	Unknown	Unknown	61828.1	43056.3	64878.6	78654.1	89297.1	97656.1	110198	117850	115293	122429	114960	114850	33474.1	37068.5	37068.9	102079	100445	97240.8	141025	142363	142498	143568	112104	140749	53352.3	25088.5	44687.8	79863.6	103446	106961	145414	156024	144376	157032	145810	154750
met_879	365.065	1.729	23.278	183.69	Unknown	Unknown	210841	196089	195901	78654.1	89297.1	97656.1	110198	117850	115293	122429	114960	114850	186778	146202	213261	102079	100445	97240.8	141025	142363	142498	143568	112104	140749	191708	229645	248052	79863.6	103446	106961	145414	156024	144376	157032	145810	154750
met_162	289.035	1.73	19.442	154.5	Unknown	Unknown	1369740	1293375	1493544	78654.1	89297.1	97656.1	110198	117850	115293	122429	114960	114850	1233198	1086197	1393238	102079	100445	97240.8	141025	142363	142498	143568	112104	140749	1572734	1395949	1444189	79863.6	103446	106961	145414	156024	144376	157032	145810	154750
met_2675	327.967	1.73	23.905	189.46	Unknown	Unknown	39763.4	155509	87767.1	78654.1	89297.1	97656.1	110198	117850	115293	122429	114960	114850	81008.8	11650.8	85469.2	102079	100445	97240.8	141025	142363	142498	143568	112104	140749	39860.7	201159	108046	79863.6	103446	106961	145414	156024	144376	157032	145810	154750
met_283	451.034	1.73	26.603	208.81	Unknown	Unknown	675781	654395	760199	78654.1	89297.1	97656.1	110198	117850	115293	122429	114960	114850	633262	620626	686340	102079	100445	97240.8	141025	142363	142498	143568	112104	140749	805919	830838	855463	79863.6	103446	106961	145414	156024	144376	157032	145810	154750
met_422	578.931	1.73	27.383	213.6	Unknown	Unknown	487393	428337	500900	78654.1	89297.1	97656.1	110198	117850	115293	122429	114960	114850	394971	401173	543400	102079	100445	97240.8	141025	142363	142498	143568	112104	140749	494679	471603	555333	79863.6	103446	106961	145414	156024	144376	157032	145810	154750
met_867	245.045	1.731	19.165	153.48	Unknown	Unknown	198500	225661	211369	78654.1	89297.1	97656.1	110198	117850	115293	122429	114960	114850	173207	173188	223847	102079	100445	97240.8	141025	142363	142498	143568	112104	140749	249025	286151	222474	79863.6	103446	106961	145414	156024	144376	157032	145810	154750
met_895	479.978	1.731	26.167	205.01	Unknown	Unknown	215482	191325	218591	78654.1	89297.1	97656.1	110198	117850	115293	122429	114960	114850	163591	169230	234018	102079	100445	97240.8	141025	142363	142498	143568	112104	140749	235706	196046	274267	79863.6	103446	106961	145414	156024	144376	157032	145810	154750
met_10464	273.038	1.732	24.832	198.44	Unknown	Unknown	136689	13715.5	8356.48	78654.1	89297.1	97656.1	110198	117850	115293	122429	114960	114850	19180.6	6689.04	166492	102079	100445	97240.8	141025	142363	142498	143568	112104	140749	2862.48	5553.35	8492	79863.6	103446	106961	145414	156024	144376	157032	145810	154750
met_3217	272.032	1.732	25.895	207.11	Unknown	Unknown	67718.2	47651.8	121424	78654.1	89297.1	97656.1	110198	117850	115293	122429	114960	114850	200928	35135.7	24565.6	102079	100445	97240.8	141025	142363	142498	143568	112104	140749	88724	201159	2091.8	79863.6	103446	106961	145414	156024	144376	157032	145810	154750
met_438	487.98	1.732	25.762	201.7	Unknown	Unknown	499357	396513	508800	78654.1	89297.1	97656.1	110198	117850	115293	122429	114960	114850	376648	382618	486587	102079	100445	97240.8	141025	142363	142498	143568	112104	140749	484972	508314	554800	79863.6	103446	106961	145414	156024	144376	157032	145810	154750
met_1543	493.992	1.733	26.934	210.92	Unknown	Unknown	128762	102039	115104	78654.1	89297.1	97656.1	110198	117850	115293	122429	114960	114850	78379.8	84433.4	89231.1	102079	100445	97240.8	141025	142363	142498	143568	112104	140749	112581	135219	140062	79863.6	103446	106961	145414	156024	144376	157032	145810	154750
met_8068	315.05	1.733	21.718	172.23	Unknown	Unknown	12180.7	12021.5	15871.8	78654.1	89297.1	97656.1	110198	117850	115293	122429	114960	114850	7600.4	11570.3	10512.1	102079	100445	97240.8	141025	142363	142498	143568	112104	140749	13310	13787.6	16248.2	79863.6	103446	106961	145414	156024	144376	157032	145810	154750
met_808	477.962	1.733	24.594	192.57	Unknown	Unknown	264302	204490	229526	78654.1	89297.1	97656.1	110198	117850	115293	122429	114960	114850	176107	214774	285366	102079	100445	97240.8	141025	142363	142498	143568	112104	140749	286660	251595	252065	79863.6	103446	106961	145414	156024	144376	157032	145810	154750
met_12	327.967	1.734	20.398	161.35	Unknown	Unknown	1.691982E7	1.401231E7	1.66095E7	78654.1	89297.1	97656.1	110198	117850	115293	122429	114960	114850	1.304397E7	1.229714E7	1.657177E7	102079	100445	97240.8	141025	142363	142498	143568	112104	140749	1.729174E7	1.618518E7	1.887066E7	79863.6	103446	106961	145414	156024	144376	157032	145810	154750
met_187	325.972	1.734	20.414	161.52	Unknown	Unknown	1229546	1015238	1154846	78654.1	89297.1	97656.1	110198	117850	115293	122429	114960	114850	887617	852768	1274076	102079	100445	97240.8	141025	142363	142498	2208.38	112104	140749	1179647	1235844	1262513	79863.6	103446	106961	145414	156024	144376	157032	145810	154750
met_203	327.967	1.734	21.681	171.63	Unknown	Unknown	1208662	737325	1277618	78654.1	89297.1	97656.1	110198	117850	115293	122429	114960	114850	584523	746934	1160357	102079	100445	97240.8	141025	142363	142498	143568	112104	539.595	1230137	441880	1565820	79863.6	103446	106961	145414	156024	144376	157032	145810	154750
met_583	409.055	1.734	24.373	191.7	Unknown	Unknown	305266	266715	403104	78654.1	89297.1	97656.1	110198	117850	115293	122429	114960	114850	286486	245651	349822	102079	100445	97240.8	141025	142363	142498	143568	112104	140749	327110	388010	390910	79863.6	103446	106961	145414	156024	144376	157032	145810	154750
met_6110	832.919	1.734	34.226	265.64	Unknown	Unknown	24474	19583.9	29608	78654.1	89297.1	97656.1	110198	117850	115293	122429	114960	114850	1659.53	174561	27877.5	102079	100445	97240.8	141025	142363	142498	143568	112104	140749	27280.1	23673.9	22752.1	79863.6	103446	106961	145414	156024	144376	157032	145810	154750
met_4845	547.086	1.735	27.244	212.82	Unknown	Unknown	27665.2	27993.2	29617.1	78654.1	89297.1	97656.1	110198	117850	115293	122429	114960	114850	26982	21797.7	27243.9	102079	100445	97240.8	141025	142363	142498	143568	112104	140749	33592.6	30976.8	26489.2	79863.6	103446	106961	145414	156024	144376	157032	145810	154750
met_530	330.975	1.735	20.755	164.15	Unknown	Unknown	412865	336428	400142	78654.1	89297.1	97656.1	110198	117850	115293	122429	114960	114850	314269	165950	425737	102079	100445	97240.8	141025	142363	142498	143568	112104	140749	413211	363380	367400	79863.6	103446	106961	145414	156024	144376	157032	145810	154750
met_1049	599.998	1.736	31.672	247.22	Unknown	Unknown	174147	141876	192845	78654.1	89297.1	97656.1	110198	117850	115293	122429	114960	114850	145100	135278	160589	102079	100445	97240.8	141025	142363	142498	143568	112104	140749	199957	198305	222457	79863.6	103446	106961	145414	156024	144376	157032	145810	154750
met_2010	469.006	1.736	26.351	206.58	Unknown	Unknown	77102.8	73533.6	61768.4	78654.1	89297.1	97656.1	110198	117850	115293	122429	114960	114850	57816.1	52703	101993	102079	100445	97240.8	141025	142363	142498	143568	112104	140749	76547.4	82164.3	99923.7	79863.6	103446	106961	145414	156024	144376	157032	145810	154750
met_3218	372.964	1.736	21.102	166.23	Unknown	Unknown	67258.8	32548.3	52684.2	78654.1	89297.1	97656.1	110198	117850	115293	122429	114960	114850	200928	16858.2	63839.3	102079	100445	97240.8	141025	142363	142498	143568	112104	140749	29499.9	30488.8	65540.2	79863.6	103446	106961	145414	156024	144376	157032	145810	154750
met_3970	814.939	1.736	33.628	261.08	Unknown	Unknown	47897.2	27545.7	36400.9	78654.1	89297.1	97656.1	110198	117850	115293	122429	114960	114850	30233.9	37595.8	44034.1	102079	100445	97240.8	141025	142363	142498	143568	112104	140749	54567.5	29616.2	31739	79863.6	103446	106961	145414	156024	144376	157032	145810	154750
met_5505	471.002	1.736	26.372	206.77	Unknown	Unknown	37540.5	22403.1	17824.6	78654.1	89297.1	97656.1	110198	117850	115293	122429	114960	114850	200928	174561	37966.1	102079	100445	97240.8	141025	142363	142498	143568	112104	140749	23493.7	25985.7	30657.9	79863.6	103446	106961	145414	156024	144376	157032	145810	154750
met_1324	499.959	1.737	24.754	193.61	Unknown	Unknown	136188	88316	167473	78654.1	89297.1	97656.1	110198	117850	115293	122429	114960	114850	74518.7	96412.3	132664	102079	100445	97240.8	141025	142363	142498	143568	112104	140749	159698	96330.4	212995	79863.6	103446	106961	145414	156024	144376	157032	145810	154750
met_1983	332.971	1.737	26.251	208.16	Unknown	Unknown	106345	72633.1	80462.7	78654.1	89297.1	97656.1	110198	117850	115293	122429	114960	114850	53450.2	51940.2	91193.7	102079	100445	97240.8	141025	142363	142498	143568	112104	140749	89858.7	54213.8	78852.7	79863.6	103446	106961	145414	156024	144376	157032	145810	154750
met_277	255.029	1.737	19.148	153.02	Unknown	Unknown	769028	667092	792785	78654.1	89297.1	97656.1	110198	117850	115293	122429	114960	114850	565433	539918	765128	102079	100445	97240.8	141025	142363	142498	143568	112104	140749	790253	733606	891704	79863.6	103446	106961	145414	156024	144376	157032	145810	154750
met_2991	243.029	1.737	22.895	183.85	Unknown	Unknown	38235.8	5440.3	46723.2	78654.1	89297.1	97656.1	110198	117850	115293	122429	114960	114850	48825.6	63913.5	71241.8	102079	100445	97240.8	141025	142363	142498	143568	112104	140749	13123.1	49405	83965.2	79863.6	103446	106961	145414	156024	144376	157032	145810	154750
met_4568	599.998	1.737	32.759	255.79	Unknown	Unknown	27741.5	30026.3	34952.8	78654.1	89297.1	97656.1	110198	117850	115293	122429	114960	114850	29032.9	26116.7	19879.4	102079	100445	97240.8	141025	142363	142498	143568	112104	140749	30920.1	36732.1	36125.4	79863.6	103446	106961	145414	156024	144376	157032	145810	154750
met_768	273.039	1.737	27.099	216.78	Unknown	Unknown	197710	251286	262791	78654.1	89297.1	97656.1	110198	117850	115293	122429	114960	114850	256854	201474	277543	102079	100445	97240.8	141025	142363	142498	143568	112104	140749	267095	293874	261848	79863.6	103446	106961	145414	156024	144376	157032	145810	154750
met_886	330.975	1.737	26.251	208.2	Unknown	Unknown	236236	161902	204760	78654.1	89297.1	97656.1	110198	117850	115293	122429	114960	114850	151778	131974	236772	102079	100445	97240.8	141025	142363	142498	143568	112104	140749	225047	203872	255554	79863.6	103446	106961	145414	156024	144376	157032	145810	154750
met_10527	286.985	1.739	20.768	165.23	Unknown	Unknown	136689	5881.02	8849.54	78654.1	89297.1	97656.1	110198	117850	115293	122429	114960	114850	9036.75	2769.44	166492	102079	100445	97240.8	141025	142363	142498	143568	112104	140749	12974.1	4697.58	13292.4	79863.6	103446	106961	145414	156024	144376	157032	145810	154750
met_1170	287.019	1.739	24.028	191.51	Unknown	Unknown	147861	155119	137382	78654.1	89297.1	97656.1	110198	117850	115293	122429	114960	114850	101464	136817	133257	102079	100445	97240.8	141025	142363	142498	143568	112104	140749	166725	189420	146367	79863.6	103446	106961	145414	156024	144376	157032	145810	154750
met_4430	354.954	1.739	21.065	166.22	Unknown	Unknown	40289.5	10942.1	39694.1	78654.1	89297.1	97656.1	110198	117850	115293	122429	114960	114850	19211.6	174561	42507.7	102079	100445	97240.8	141025	142363	142498	143568	112104	140749	27303.6	17937.2	45453.4	79863.6	103446	106961	145414	156024	144376	157032	145810	154750
met_56	463.983	1.739	26.025	204.06	Unknown	Unknown	3742744	3162948	3932756	78654.1	89297.1	97656.1	110198	117850	115293	122429	114960	114850	3183882	3006626	3778839	102079	100445	97240.8	141025	142363	142498	143568	112104	140749	4094688	3893497	4210756	79863.6	103446	106961	145414	156024	144376	157032	145810	154750
met_776	461.987	1.739	26.009	203.96	Unknown	Unknown	243760	215143	277046	78654.1	89297.1	97656.1	110198	117850	115293	122429	114960	114850	209871	182002	216531	102079	100445	97240.8	141025	142363	142498	143568	112104	140749	280172	279193	295297	79863.6	103446	106961	145414	156024	144376	157032	145810	154750
met_1103	381.06	1.74	23.485	185.08	Unknown	Unknown	190332	188371	166910	78654.1	89297.1	97656.1	110198	117850	115293	122429	114960	114850	135722	179266	149840	102079	100445	97240.8	141025	142363	142498	143568	112104	140749	180500	200356	223590	79863.6	103446	106961	145414	156024	144376	157032	145810	154750
met_7921	301.927	1.741	19.411	153.96	Unknown	Unknown	18689.6	1579.24	9586.93	78654.1	89297.1	97656.1	110198	117850	115293	122429	114960	114850	4226.22	174561	15873	102079	100445	97240.8	141025	142363	142498	143568	112104	140749	21652.5	11531.5	4982.18	79863.6	103446	106961	145414	156024	144376	157032	145810	154750
met_823	271.024	1.741	19.784	157.72	Unknown	Unknown	234769	203586	240301	78654.1	89297.1	97656.1	110198	117850	115293	122429	114960	114850	216391	200646	226383	102079	100445	97240.8	141025	142363	142498	143568	112104	140749	263185	266587	248843	79863.6	103446	106961	145414	156024	144376	157032	145810	154750
met_1573	563.966	1.744	28.022	218.78	Unknown	Unknown	112309	102006	121281	78654.1	89297.1	97656.1	110198	117850	115293	122429	114960	114850	102583	94101.3	92785.4	102079	100445	97240.8	141025	142363	142498	143568	112104	140749	89190.6	73382.8	128557	79863.6	103446	106961	145414	156024	144376	157032	145810	154750
met_1631	243.029	1.744	19.197	153.81	Unknown	Unknown	116460	84717.6	1922.58	78654.1	89297.1	97656.1	110198	117850	115293	122429	114960	114850	90998.2	115417	112582	102079	100445	97240.8	141025	142363	142498	143568	112104	140749	76497.9	139739	130447	79863.6	103446	106961	145414	156024	144376	157032	145810	154750
met_3477	587.049	1.744	31.846	248.72	Unknown	Unknown	44376	39558.4	52521.8	78654.1	89297.1	97656.1	110198	117850	115293	122429	114960	114850	48876.3	34933.1	44375.7	102079	100445	97240.8	141025	142363	142498	143568	112104	140749	26681	51687.3	46026.8	79863.6	103446	106961	145414	156024	144376	157032	145810	154750
met_13786	328.969	1.745	24.098	191.02	Unknown	Unknown	1260.78	8047.8	4925	78654.1	89297.1	97656.1	110198	117850	115293	122429	114960	114850	200928	4497	1367.24	102079	100445	97240.8	141025	142363	142498	143568	112104	140749	6553.19	3097.73	11050.7	79863.6	103446	106961	145414	156024	144376	157032	145810	154750
met_342	287.019	1.745	19.337	153.7	Unknown	Unknown	539832	545081	582732	78654.1	89297.1	97656.1	110198	117850	115293	122429	114960	114850	519289	404414	595930	102079	100445	97240.8	141025	142363	142498	143568	112104	140749	673982	694318	594909	79863.6	103446	106961	145414	156024	144376	157032	145810	154750
met_7995	373.971	1.745	21.942	172.88	Unknown	Unknown	136689	33550.7	6766.11	78654.1	89297.1	97656.1	110198	117850	115293	122429	114960	114850	5429.67	174561	8764.83	102079	100445	97240.8	141025	142363	142498	143568	112104	140749	9283.27	17937.7	11331.3	79863.6	103446	106961	145414	156024	144376	157032	145810	154750
met_7139	273.038	1.747	28.436	227.57	Unknown	Unknown	136689	20660.7	2068.51	78654.1	89297.1	97656.1	110198	117850	115293	122429	114960	114850	22908.5	11119.5	16100.9	102079	100445	97240.8	141025	142363	142498	143568	112104	140749	18181	26637.5	25572	79863.6	103446	106961	145414	156024	144376	157032	145810	154750
met_1950	714.946	1.748	30.65	238.29	Unknown	Unknown	76991.7	70523.6	82480.8	78654.1	89297.1	97656.1	110198	117850	115293	122429	114960	114850	73719.1	69417.2	83997.3	102079	100445	97240.8	141025	142363	142498	143568	112104	140749	92738.5	84895.6	87674	79863.6	103446	106961	145414	156024	144376	157032	145810	154750
met_399	303.05	1.748	20.503	162.71	Unknown	Unknown	502879	422147	564187	78654.1	89297.1	97656.1	110198	117850	115293	122429	114960	114850	465754	423126	511769	102079	100445	97240.8	141025	142363	142498	143568	112104	140749	592470	478370	535560	79863.6	103446	106961	145414	156024	144376	157032	145810	154750
met_2377	327.966	1.749	24.823	196.84	Unknown	Unknown	136689	51765.2	111070	78654.1	89297.1	97656.1	110198	117850	115293	122429	114960	114850	117999	30858.9	109929	102079	100445	97240.8	141025	142363	142498	7328.19	4620.17	140749	102632	201159	41439.1	79863.6	103446	106961	145414	156024	144376	157032	145810	154750
met_1443	623.995	1.75	28.754	224.03	Unknown	Unknown	129529	104076	132332	78654.1	89297.1	97656.1	110198	117850	115293	122429	114960	114850	105258	88866.8	114795	102079	100445	97240.8	141025	142363	142498	143568	112104	140749	112814	134428	140508	79863.6	103446	106961	145414	156024	144376	157032	145810	154750
met_287	255.03	1.751	19.861	158.79	Unknown	Unknown	712829	632266	735989	78654.1	89297.1	97656.1	110198	117850	115293	122429	114960	114850	568687	597874	696949	102079	100445	97240.8	141025	142363	142498	143568	112104	140749	756518	763782	779281	79863.6	103446	106961	145414	156024	144376	157032	145810	154750
met_87	297.037	1.751	20.532	163.08	Unknown	Unknown	2405567	2133720	2521021	78654.1	89297.1	97656.1	110198	117850	115293	122429	114960	114850	2031614	1962273	2373719	102079	100445	97240.8	141025	142363	142498	143568	112104	140749	2595676	2415720	2614971	79863.6	103446	106961	145414	156024	144376	157032	145810	154750
met_2692	423.034	1.752	24.209	190.21	Unknown	Unknown	57057.9	59604.5	108912	78654.1	89297.1	97656.1	110198	117850	115293	122429	114960	114850	76358.6	43567.2	32836.1	102079	100445	97240.8	141025	142363	142498	143568	112104	140749	172799	61328	92299.9	79863.6	103446	106961	145414	156024	144376	157032	145810	154750
met_12530	273.039	1.754	23.51	187.77	Unknown	Unknown	6675.05	11099.1	8663.11	78654.1	89297.1	97656.1	110198	117850	115293	122429	114960	114850	1405.14	174561	166492	102079	100445	97240.8	141025	142363	142498	143568	112104	140749	2101.84	11318.4	4852.97	79863.6	103446	106961	145414	156024	144376	157032	145810	154750
met_2076	295.022	1.755	26.121	208.14	Unknown	Unknown	56416	60473.4	83869.9	78654.1	89297.1	97656.1	110198	117850	115293	122429	114960	114850	57055.3	74040.5	66992.6	102079	100445	97240.8	141025	142363	142498	143568	112104	140749	89255.8	76544.4	92252.8	79863.6	103446	106961	145414	156024	144376	157032	145810	154750
met_4068	435.029	1.757	24.224	190.19	Unknown	Unknown	17893.9	22730.1	140098	78654.1	89297.1	97656.1	110198	117850	115293	122429	114960	114850	200928	32614.1	61930.1	102079	100445	97240.8	141025	142363	142498	143568	112104	140749	73190	23982.3	74882.4	79863.6	103446	106961	145414	156024	144376	157032	145810	154750
met_7484	385.971	1.759	25.174	198.47	Unknown	Unknown	10175.7	12602.3	7846.3	78654.1	89297.1	97656.1	110198	117850	115293	122429	114960	114850	13300.3	13478.2	16684.6	102079	100445	97240.8	141025	142363	142498	143568	112104	140749	16246.2	15819	11770.5	79863.6	103446	106961	145414	156024	144376	157032	145810	154750
met_7363	445.993	1.761	23.73	186.12	Unknown	Unknown	5122.85	16962.4	12205.6	78654.1	89297.1	97656.1	110198	117850	115293	122429	114960	114850	200928	18553.8	23257.8	102079	100445	97240.8	141025	142363	142498	143568	4028.79	140749	9557.89	201159	9060.6	79863.6	103446	106961	145414	156024	144376	157032	145810	154750
met_11882	299.013	1.763	28.856	230.03	Unknown	Unknown	136689	155509	7438.6	78654.1	89297.1	97656.1	110198	117850	115293	122429	114960	114850	3307.38	17626.6	1903.26	102079	100445	97240.8	141025	142363	142498	143568	112104	140749	3971.79	2916.9	5360.65	79863.6	103446	106961	145414	156024	144376	157032	145810	154750
met_789	433.053	1.764	26.287	206.56	Unknown	Unknown	222350	211246	275314	78654.1	89297.1	97656.1	110198	117850	115293	122429	114960	114850	213240	206092	236541	102079	100445	97240.8	141025	142363	142498	143568	112104	140749	274598	259547	250805	79863.6	103446	106961	145414	156024	144376	157032	145810	154750
met_14	273.04	1.765	19.84	158.12	Unknown	Unknown	1.431242E7	1.506503E7	1.592872E7	78654.1	89297.1	97656.1	110198	117850	115293	122429	114960	114850	1.378575E7	1.372771E7	1.572723E7	102079	100445	97240.8	141025	142363	142498	94000.7	147453	2219.74	1.561338E7	1.513481E7	1.767852E7	79863.6	103446	106961	6320.31	156024	144376	157032	145810	154750
met_1549	477.963	1.765	25.859	202.59	Unknown	Unknown	3420.24	129931	131143	78654.1	89297.1	97656.1	110198	117850	115293	122429	114960	114850	89065.2	88263.7	145789	102079	100445	97240.8	141025	142363	142498	143568	112104	140749	172799	164026	167214	79863.6	103446	106961	145414	156024	144376	157032	145810	154750
met_7865	385.972	1.769	21.441	168.7	Unknown	Unknown	6314.96	7630.19	5558.24	78654.1	89297.1	97656.1	110198	117850	115293	122429	114960	114850	1002	7756.75	13462.5	102079	100445	97240.8	141025	142363	142498	143568	112104	140749	12448	10260.2	6017.28	79863.6	103446	106961	145414	156024	144376	157032	145810	154750
met_703	323.973	1.77	20.486	162.13	Unknown	Unknown	316786	261828	293274	78654.1	89297.1	97656.1	110198	117850	115293	122429	114960	114850	275596	251970	38562.8	102079	100445	97240.8	141025	142363	142498	143568	112104	140749	314800	332889	356183	79863.6	103446	106961	145414	156024	144376	157032	145810	154750
met_11118	463.982	1.772	22.81	178.61	Unknown	Unknown	3262.35	12313	140098	78654.1	89297.1	97656.1	110198	117850	115293	122429	114960	114850	4956.73	2216.84	5856.38	102079	100445	97240.8	141025	142363	142498	143568	112104	140749	22938.9	3773.07	6541.58	79863.6	103446	106961	145414	156024	144376	157032	145810	154750
met_4871	657.949	1.777	30.614	238.42	Unknown	Unknown	19527.7	49845.2	24923	78654.1	89297.1	97656.1	110198	117850	115293	122429	114960	114850	200928	34090.5	166492	102079	100445	97240.8	141025	142363	142498	143568	112104	140749	15628.4	18050.3	46789.9	79863.6	103446	106961	145414	156024	144376	157032	145810	154750
met_104	299.014	1.778	19.93	158.19	Unknown	Unknown	2186837	1924271	2249070	78654.1	89297.1	97656.1	110198	117850	115293	122429	114960	114850	1778425	1657161	2099821	102079	100445	97240.8	141025	142363	142498	143568	112104	140749	2266621	2185370	2405175	79863.6	103446	106961	145414	156024	144376	157032	145810	154750
met_13224	519.917	1.788	30.451	238.39	Unknown	Unknown	1273.29	155509	6719.1	78654.1	89297.1	97656.1	110198	117850	115293	122429	114960	114850	11933.3	8023.4	166492	102079	100445	97240.8	141025	142363	142498	143568	112104	140749	4133.26	10114.6	3174.98	79863.6	103446	106961	145414	156024	144376	157032	145810	154750
met_1028	373.023	1.798	23.454	184.96	Unknown	Unknown	173039	158561	169270	78654.1	89297.1	97656.1	110198	117850	115293	122429	114960	114850	139031	152473	124147	102079	100445	97240.8	141025	142363	142498	143568	112104	140749	200879	222385	167819	79863.6	103446	106961	145414	156024	144376	157032	145810	154750
met_897	328.973	1.804	26.251	208.24	Unknown	Unknown	102572	207267	154130	78654.1	89297.1	97656.1	110198	117850	115293	122429	114960	114850	315336	212480	214718	102079	100445	97240.8	141025	142363	142498	143568	112104	140749	222218	194141	253086	79863.6	103446	106961	145414	156024	144376	157032	145810	154750
met_1820	401.967	1.808	22.351	175.72	Unknown	Unknown	71255	88483.1	43977.2	78654.1	89297.1	97656.1	110198	117850	115293	122429	114960	114850	44216.2	86474.3	135043	102079	100445	97240.8	141025	142363	142498	143568	112104	140749	60207.7	48870.8	73710.8	79863.6	103446	106961	145414	156024	144376	157032	145810	154750
met_2046	519.917	1.811	27.944	218.59	Unknown	Unknown	70796.3	71975.7	74129.9	78654.1	89297.1	97656.1	110198	117850	115293	122429	114960	114850	75838.7	67501.9	73203.8	102079	100445	97240.8	141025	142363	142498	143568	112104	140749	79518.2	75762.2	82846.6	79863.6	103446	106961	145414	156024	144376	157032	145810	154750
met_15	309.978	1.822	20.047	158.91	Unknown	Unknown	1.170607E7	1.06864E7	1.135008E7	2.07716e+06	3.65845e+06	3.65002e+06	2.12907e+06	3.07925e+06	2494714	3.33437e+06	3.16614e+06	2.36856e+06	1.019392E7	9757544	1.161116E7	3.42495e+06	3.70117e+06	2.82743e+06	177096	300609	139512	115002	1179869	497346	1.099505E7	1.095025E7	1.184663E7	2.14715e+06	3.04138e+06	3.57165e+06	390043	105526	67791.1	3.81336e+06	3.53357e+06	3.88161e+06
met_7164	549.977	1.822	27.272	212.96	Unknown	Unknown	136689	155509	19362.9	78654.1	89297.1	97656.1	110198	117850	115293	122429	114960	114850	23275.8	11491	32174.5	102079	100445	97240.8	141025	142363	142498	143568	112104	140749	3993.39	6172.73	4439.62	79863.6	103446	106961	145414	156024	144376	157032	145810	154750
met_3958	281.982	1.825	19.047	151.47	Unknown	Unknown	30470.7	30468.4	22763.7	78654.1	89297.1	97656.1	110198	117850	115293	122429	114960	114850	24209.2	27392.2	39703.3	102079	100445	97240.8	141025	142363	142498	143568	112104	140749	16105.4	33269.1	24925.3	79863.6	103446	106961	145414	156024	144376	157032	145810	154750
met_2930	342.954	1.832	20.72	163.65	Unknown	Unknown	38333.4	53900.4	42097.5	78654.1	89297.1	97656.1	110198	117850	115293	122429	114960	114850	60060.2	21668.7	44471.9	102079	100445	97240.8	141025	142363	142498	143568	112104	140749	60039.4	50787.2	57992.1	79863.6	103446	106961	145414	156024	144376	157032	145810	154750
met_1323	327.967	1.841	24.824	196.83	Unknown	Unknown	180722	208552	76947.2	78654.1	89297.1	97656.1	110198	117850	115293	122429	114960	114850	94078.3	69615.3	57427.2	102079	100445	97240.8	141025	142363	142498	143568	112104	140749	92330.8	169055	88302.1	79863.6	103446	106961	145414	156024	144376	157032	145810	154750
met_602	305.983	1.847	20.047	158.98	Unknown	Unknown	259926	319818	336058	78654.1	89297.1	97656.1	110198	117850	115293	122429	114960	114850	326913	251519	164997	102079	100445	97240.8	141025	142363	142498	143568	112104	140749	355970	363595	376249	79863.6	103446	106961	145414	156024	144376	157032	145810	154750
met_3776	399.951	1.849	21.989	172.88	Unknown	Unknown	136689	54055.6	28245.5	78654.1	89297.1	97656.1	110198	117850	115293	122429	114960	114850	42339	27981.4	96210.6	102079	100445	97240.8	141025	142363	142498	143568	112104	140749	69029.2	201159	18605.1	79863.6	103446	106961	145414	156024	144376	157032	145810	154750
met_4069	445.993	1.857	23.69	185.77	Unknown	Unknown	38384.3	18469.7	20800.3	78654.1	89297.1	97656.1	110198	117850	115293	122429	114960	114850	70324.2	174561	11015.9	102079	100445	97240.8	141025	142363	142498	143568	112104	140749	10402.7	13234.2	13349.7	79863.6	103446	106961	145414	156024	144376	157032	145810	154750
met_10043	259.024	1.859	20.049	160.22	Unknown	Unknown	17464.5	10688.8	12900.9	78654.1	89297.1	97656.1	110198	117850	115293	122429	114960	114850	3716.77	6399.73	166492	102079	100445	97240.8	141025	142363	142498	143568	112104	140749	6582.31	14788.9	171479	79863.6	103446	106961	145414	156024	144376	157032	145810	154750
met_11592	381.91	1.872	21.114	166.16	Unknown	Unknown	3646.07	15430.9	3738.33	78654.1	89297.1	97656.1	110198	117850	115293	122429	114960	114850	2949.68	5738.29	166492	102079	100445	97240.8	141025	142363	142498	143568	112104	140749	6069.28	3491.3	171479	79863.6	103446	106961	145414	156024	144376	157032	145810	154750
met_2321	321.9	1.875	19.197	151.85	Unknown	Unknown	73297.3	64836.4	27122.5	78654.1	89297.1	97656.1	110198	117850	115293	122429	114960	114850	49996.6	48983.5	95671.7	102079	100445	97240.8	141025	142363	142498	143568	112104	140749	120330	28216.1	141575	79863.6	103446	106961	145414	156024	144376	157032	145810	2112.7
met_1421	345.944	1.879	20.64	162.96	Unknown	Unknown	160527	95813.6	110052	78654.1	89297.1	97656.1	110198	117850	115293	122429	114960	114850	124770	51552.2	175589	102079	100445	97240.8	141025	142363	142498	143568	112104	140749	90614	120467	95632.3	79863.6	103446	106961	145414	156024	144376	157032	145810	154750
met_9571	364.055	1.883	22.566	178.03	Unknown	Unknown	3378.2	491.027	140098	78654.1	89297.1	97656.1	110198	117850	115293	122429	114960	114850	7475.8	3831.98	16595	102079	100445	97240.8	141025	142363	142498	143568	112104	140749	3661.56	21970.8	171479	79863.6	103446	106961	145414	156024	144376	157032	145810	154750
met_2830	540.912	1.886	25.858	201.93	Unknown	Unknown	36423.8	73200.9	70706.5	78654.1	89297.1	97656.1	110198	117850	115293	122429	114960	114850	200928	69871.3	62631.3	102079	100445	97240.8	141025	142363	142498	143568	112104	140749	33156.3	20338.6	22044.5	79863.6	103446	106961	145414	156024	144376	157032	145810	154750
met_3244	317.029	1.904	20.033	158.66	Unknown	Unknown	33959	89392.1	55177.4	78654.1	89297.1	97656.1	110198	117850	115293	122429	114960	114850	22556.2	71480.8	28927.4	102079	100445	97240.8	141025	142363	142498	143568	112104	140749	73919.4	20718.1	171479	79863.6	103446	106961	145414	156024	144376	157032	145810	154750
met_402	285.923	1.909	20.573	163.69	Unknown	Unknown	525359	485227	524918	78654.1	89297.1	97656.1	110198	117850	115293	122429	114960	114850	460044	491097	556651	102079	100445	97240.8	141025	142363	142498	143568	112104	1744.86	523808	523614	543872	79863.6	103446	106961	145414	156024	144376	157032	145810	154750
met_3011	409.055	1.925	24.383	191.8	Unknown	Unknown	38621.3	79302.7	140098	78654.1	89297.1	97656.1	110198	117850	115293	122429	114960	114850	21083.6	46820.9	77558.3	102079	100445	97240.8	141025	142363	142498	143568	112104	140749	80232.5	57146	66884.6	79863.6	103446	106961	145414	156024	144376	157032	145810	154750
met_2665	438.925	1.936	23.792	186.67	Unknown	Unknown	33456.2	46318.5	22315.7	78654.1	89297.1	97656.1	110198	117850	115293	122429	114960	114850	19604.3	55070.5	68659.3	102079	100445	97240.8	141025	142363	142498	143568	112104	140749	17480.2	13127.9	84927.2	79863.6	103446	106961	145414	156024	144376	157032	145810	154750
met_3141	481.959	1.939	26.166	204.95	Unknown	Unknown	34458.8	81001.7	82359.3	78654.1	89297.1	97656.1	110198	117850	115293	122429	114960	114850	27952.1	28402.7	15647.6	102079	100445	97240.8	141025	142363	142498	143568	112104	140749	21592.2	52699.1	14736.7	79863.6	103446	106961	145414	156024	144376	157032	145810	154750
met_4995	416.868	1.943	22.48	176.55	Unknown	Unknown	24160.9	11758.5	55763.2	78654.1	89297.1	97656.1	110198	117850	115293	122429	114960	114850	200928	41204.9	32275.3	102079	100445	97240.8	141025	142363	142498	143568	112104	140749	13816.1	9993.6	171479	79863.6	103446	106961	145414	156024	144376	157032	145810	154750
met_9588	243.029	1.952	19.183	153.68	Unknown	Unknown	19634.3	2452.68	11773.4	78654.1	89297.1	97656.1	110198	117850	115293	122429	114960	114850	10723	10106.9	9909.57	102079	100445	97240.8	141025	142363	142498	143568	112104	140749	7128.18	8621.41	10690.4	79863.6	103446	106961	145414	156024	144376	157032	145810	154750
met_7628	277.034	1.955	19.211	152.94	Unknown	Unknown	7127.85	4577.42	34596.5	78654.1	89297.1	97656.1	110198	117850	115293	122429	114960	114850	200928	12518.3	16460.4	102079	100445	97240.8	141025	142363	142498	143568	112104	140749	16672.9	20229.5	171479	79863.6	103446	106961	145414	156024	144376	157032	145810	154750
met_6667	363.05	1.956	22.743	179.48	Unknown	Unknown	19179.9	6213.84	140098	78654.1	89297.1	97656.1	110198	117850	115293	122429	114960	114850	8549.2	35287.7	21377.4	102079	100445	97240.8	141025	142363	142498	143568	112104	140749	38406	23371.4	171479	79863.6	103446	106961	145414	156024	144376	157032	145810	154750
met_1221	281.024	1.964	19.566	155.69	Unknown	Unknown	181962	118473	185843	78654.1	89297.1	97656.1	110198	117850	115293	122429	114960	114850	159693	39689.9	166452	102079	100445	97240.8	141025	142363	142498	5403.51	1685.94	140749	171908	113649	72186.5	79863.6	103446	106961	145414	156024	144376	157032	145810	154750
met_299	440.92	1.972	23.797	186.69	Unknown	Unknown	811820	740298	772468	78654.1	89297.1	97656.1	110198	117850	115293	122429	114960	114850	693069	701768	580981	102079	100445	97240.8	141025	142363	142498	143568	112104	4685.15	753837	710010	775825	79863.6	103446	106961	145414	156024	144376	157032	145810	154750
met_663	309.977	1.973	24.411	193.97	Unknown	Unknown	311807	247397	334826	78654.1	89297.1	97656.1	110198	117850	115293	122429	114960	114850	317623	213916	307294	102079	100445	97240.8	141025	142363	142498	143568	2457.23	1052.79	294928	350895	271603	79863.6	103446	106961	145414	156024	144376	157032	145810	154750
met_8186	327.967	1.975	24.841	197	Unknown	Unknown	2863.55	155509	8529.95	78654.1	89297.1	97656.1	110198	117850	115293	122429	114960	114850	7323.31	9978.3	23473.6	102079	100445	97240.8	141025	142363	142498	143568	112104	140749	8457.21	28064.5	29660.2	79863.6	103446	106961	145414	156024	144376	157032	145810	154750
met_2447	381.907	1.986	21.813	171.73	Unknown	Unknown	17897.9	22305.9	28435.8	78654.1	89297.1	97656.1	110198	117850	115293	122429	114960	114850	71708	47991.5	44151.3	102079	100445	97240.8	141025	142363	142498	143568	112104	140749	80398	41690.3	92742.9	79863.6	103446	106961	145414	156024	144376	157032	145810	154750
met_7665	310.98	2	21.794	172.94	Unknown	Unknown	18616.2	10869.3	13100.1	78654.1	89297.1	97656.1	110198	117850	115293	122429	114960	114850	200928	21959.5	166492	102079	100445	97240.8	141025	142363	142498	143568	112104	140749	10769.9	18380.4	32160	79863.6	103446	106961	145414	156024	144376	157032	145810	154750
met_4041	339.952	2.027	20.707	163.58	Unknown	Unknown	29401.8	50527.6	140098	78654.1	89297.1	97656.1	110198	117850	115293	122429	114960	114850	20700	117462	14654.2	102079	100445	97240.8	141025	142363	142498	143568	112104	140749	23089.4	201159	19443.4	79863.6	103446	106961	145414	156024	144376	157032	145810	154750
met_508	309.977	2.03	21.794	172.94	Unknown	Unknown	315132	390624	515109	78654.1	89297.1	97656.1	110198	117850	115293	122429	114960	114850	458170	237828	456630	102079	100445	97240.8	141025	142363	142498	143568	112104	140749	261888	617667	572034	79863.6	103446	106961	145414	156024	144376	157032	145810	154750
met_1423	522.922	2.035	25.023	195.5	Unknown	Unknown	149110	95150	33684.6	78654.1	89297.1	97656.1	110198	117850	115293	122429	114960	114850	66822.9	115920	206637	102079	100445	97240.8	141025	142363	142498	143568	112104	140749	160210	130717	107658	79863.6	103446	106961	145414	156024	144376	157032	145810	154750
met_4815	409.055	2.037	24.404	191.95	Unknown	Unknown	37542.9	23159.6	25353.9	78654.1	89297.1	97656.1	110198	117850	115293	122429	114960	114850	25186.2	63220.4	166492	102079	100445	97240.8	141025	142363	142498	143568	112104	140749	48460.6	201159	51695.3	79863.6	103446	106961	145414	156024	144376	157032	145810	154750
met_2208	328.973	2.055	20.541	162.48	Unknown	Unknown	1864.14	155509	11561.9	78654.1	89297.1	97656.1	110198	117850	115293	122429	114960	114850	64307.8	121745	320890	102079	100445	97240.8	141025	142363	142498	143568	112104	140749	98485.7	201159	136937	79863.6	103446	106961	145414	156024	144376	157032	145810	154750
met_7144	326.008	2.062	21.37	169.19	Unknown	Unknown	4927.12	6572.76	5854.91	9308.35	15023.4	9270.98	6101.69	7156.22	7353.93	9637.54	9676.86	11086.6	7919.7	2084.52	6266.51	6976.46	3784.45	2624.87	5656.67	6056.49	3897.2	8829.29	3807.05	7103.1	7069.23	7547.34	5709.12	7120.61	5588.65	9962.08	4237.89	6817.92	12842.6	8157.16	5595.98	3200.13
met_2327	368.019	2.064	22.69	178.96	Unknown	Unknown	17143.7	12764	15447.4	28980	44941.2	42714.3	19613.9	27666.9	27533.1	32285.1	31743.5	35561.9	18304.7	17001.1	16988.2	18345.3	9010.65	10576.5	15987.1	20825.6	25989	10326.2	15911.4	9213.19	18475.1	16602.1	5102.14	19163.8	20023.9	52701.3	14975.2	17802	46295.1	28378.7	21705.4	16781.8
met_7037	234.992	2.09	20.273	162.83	Unknown	Unknown	23378.1	8145.73	13469.9	78654.1	89297.1	97656.1	110198	117850	115293	122429	114960	114850	8862.35	20509.1	26544.8	102079	100445	97240.8	141025	142363	142498	143568	112104	140749	21010.5	25993.2	171479	79863.6	103446	106961	145414	156024	144376	157032	145810	154750
met_2823	255.029	2.094	19.877	158.93	Unknown	Unknown	40987.1	37877.8	121209	78654.1	89297.1	97656.1	110198	117850	115293	122429	114960	114850	57105.7	26779.7	35039.4	102079	100445	97240.8	141025	142363	142498	143568	112104	140749	46805.8	110414	171479	79863.6	103446	106961	145414	156024	144376	157032	145810	154750
met_3500	424.934	2.115	23.023	180.77	Unknown	Unknown	7686.85	16633.4	17777.8	16523.2	22371.4	15469.4	20112.2	14577.3	18088.2	28357	17204.3	13707.9	22083.2	19796	20792.8	29623.1	19601.1	20519.9	24514.5	15110.5	4098.04	21138.6	25137.3	20976.6	19662.9	18883.2	19541.3	16027.6	16473.2	28105.9	23532.1	28726.8	17964.2	20026.6	18647.9	16788.5
met_9207	386.979	2.136	23.206	182.78	Unknown	Unknown	10233.7	17744	23175.1	78654.1	89297.1	97656.1	110198	117850	115293	122429	114960	114850	200928	8543.27	4395.2	102079	100445	97240.8	141025	142363	142498	143568	112104	140749	13294.7	201159	10439.1	79863.6	103446	106961	145414	156024	144376	157032	145810	154750
met_9275	289.035	2.145	19.973	158.79	Unknown	Unknown	13668.9	9123.47	17472.5	78654.1	89297.1	97656.1	110198	117850	115293	122429	114960	114850	200928	10813.5	10268	102079	100445	97240.8	141025	142363	142498	143568	112104	140749	25027.2	7622.94	171479	79863.6	103446	106961	145414	156024	144376	157032	145810	154750
met_7928	272.032	2.16	19.018	151.5	Unknown	Unknown	3794.62	155509	3213.39	78654.1	89297.1	97656.1	110198	117850	115293	122429	114960	114850	27659.2	174561	12370.1	102079	100445	97240.8	141025	142363	142498	143568	112104	140749	9565.01	19314	22736.9	79863.6	103446	106961	145414	156024	144376	157032	145810	154750
met_4628	327.966	2.184	20.375	161.15	Unknown	Unknown	13039.4	1945.97	140098	78654.1	89297.1	97656.1	110198	117850	115293	122429	114960	114850	1604.39	214605	6555.09	102079	100445	97240.8	141025	142363	142498	143568	112104	140749	172799	3587.87	11941.2	79863.6	103446	106961	145414	156024	144376	157032	145810	154750
met_12102	481.959	2.187	26.144	204.79	Unknown	Unknown	5073.18	4617.34	4822.71	78654.1	89297.1	97656.1	110198	117850	115293	122429	114960	114850	9660.39	7601.71	166492	102079	100445	97240.8	141025	142363	142498	143568	112104	140749	172799	8045.02	8644.17	79863.6	103446	106961	145414	156024	144376	157032	145810	154750
met_3094	362.922	2.221	21.116	166.48	Unknown	Unknown	16210.7	18143.1	16854.2	25048.5	17088.9	28634.1	18402.7	16175.7	18160	19097.3	16702.5	44587	31199.2	26112.6	20992.8	25105	26530	24520.4	23894.4	17441.3	20238	30066.4	20148.9	17249.6	13748.7	25522.9	25041.6	16757.7	22001.3	14087.6	21116.7	20128.1	17478.1	31356.6	13665.4	11918.6
met_4531	274.043	2.24	19.909	158.64	Unknown	Unknown	23772.9	21685	18662.2	78654.1	89297.1	97656.1	110198	117850	115293	122429	114960	114850	18425.5	174561	43894	102079	100445	97240.8	141025	142363	142498	143568	112104	140749	78355.3	201159	63276.9	79863.6	103446	106961	145414	156024	144376	157032	145810	154750
met_6296	446.996	2.25	25.563	200.61	Unknown	Unknown	136689	9363.88	20227.3	78654.1	89297.1	97656.1	110198	117850	115293	122429	114960	114850	16502.5	28387.6	13605.1	102079	100445	97240.8	141025	142363	142498	143568	112104	140749	10290.3	41842	19722.5	79863.6	103446	106961	145414	156024	144376	157032	145810	154750
met_2712	310.981	2.267	20.044	158.86	Unknown	Unknown	32502	79908.7	84248.4	78654.1	89297.1	97656.1	110198	117850	115293	122429	114960	114850	60993.3	174561	50756.2	102079	100445	97240.8	141025	142363	142498	143568	112104	140749	48278.5	201159	104882	79863.6	103446	106961	145414	156024	144376	157032	145810	154750
met_4122	440.92	2.282	23.794	186.67	Unknown	Unknown	19202.2	48789.2	49120.7	78654.1	89297.1	97656.1	110198	117850	115293	122429	114960	114850	29616.8	15329.2	39226.5	102079	100445	97240.8	141025	142363	142498	143568	112104	140749	12590.9	40963.7	24810.8	79863.6	103446	106961	145414	156024	144376	157032	145810	154750
met_10912	289.034	2.308	19.872	157.98	Unknown	Unknown	9639.37	4101.34	17191.8	78654.1	89297.1	97656.1	110198	117850	115293	122429	114960	114850	4992.85	5475.46	3122.11	102079	100445	97240.8	141025	142363	142498	143568	112104	140749	2860.03	8022.05	7768.18	79863.6	103446	106961	145414	156024	144376	157032	145810	154750
met_4855	396.05	2.35	22.896	180.17	Unknown	Unknown	7176.72	1976.5	9170.86	8421.79	8537.04	7232.12	9362.29	5555.97	6875.84	4965.44	6142.63	6838.3	13040.4	13832.9	12263.9	17069.4	11278.3	10852.9	11853.6	8015.28	11914.5	12132.1	9822.89	10058.1	14611.8	15670.9	14416.1	15592	14410.2	16551.5	12726.1	14178.2	12699	13852.6	12687.4	13956
met_5583	333.112	2.354	22.028	174.33	Unknown	Unknown	5562.31	5113.53	3718.3	7209.78	3915.48	4630.47	9042.2	6173.7	5334.4	8384.71	3795.49	7492.16	4127.24	7322.23	3661.77	14324	6866.55	8453.08	10623.2	5847.31	7855.18	10982.3	4422.98	13850.8	6450.81	6307.4	5152.47	8094.52	9396.9	8238.27	7869.77	6153.05	7836.59	6911.73	7367.4	8724.13
met_4725	253.105	2.357	19.872	158.97	Unknown	Unknown	8482.32	6010.31	5570.4	8690.71	9580.21	3765.51	12063.6	6417.09	8930.8	7793.74	8462.34	7822.31	9016.65	4919.05	3570.32	20198.5	5726.61	12204.5	10024.9	8687.05	10513.1	11178.6	8972.63	8244.67	6604.48	7420.99	4957.2	12619.9	7883.29	17642.1	7639.89	9664.39	13645	6285.15	11965	9886.64
met_795	404.076	2.357	23.532	185.1	Unknown	Unknown	49634.8	34273.6	39770.1	63917.2	50098.8	58232.8	63829.7	70173.3	55779.6	72261.7	50661.8	62333.3	63147.8	31857.9	63942.8	116134	47527.6	81844.5	102934	46724	74051.7	90901.1	44814.5	92805.7	57036.2	42349.3	45472.9	81639	66449.9	93189.6	69352.1	64773.4	89583.3	73740.2	66020.2	80152.8
met_3192	345.063	2.358	21.875	172.87	Unknown	Unknown	7833.7	7943.92	5229.52	14368.3	9734.03	11252.5	18920.5	10924.5	9862.03	12242.4	9656.84	6676.32	16855.5	6682.1	8568.99	25823.9	11506.1	13002.7	19293.8	10575.2	18020.1	22902.6	10609.9	20354.4	10539.3	10912.4	7138.08	12340.7	13471.9	21337.4	13807.6	11294.2	23498.8	14803.3	13251.6	12327.9
met_1716	229.971	2.376	19.256	154.73	Unknown	Unknown	39699.8	21446.2	37593.1	39657.8	45556.8	24627.7	40698.9	36091.3	42981.9	39858.7	21732.9	35890.1	49169.8	39656.3	41072.7	25233.1	40837.9	27951.6	32771.8	41532.8	74694.6	40898.1	36894.7	63511.8	38526.2	34404.6	34316.5	61007.7	24367.5	54421.7	39074.7	21390.3	31194.7	36899.7	39038.2	35075.2
met_7084	440.92	2.391	23.788	186.61	Unknown	Unknown	24203.2	155509	14394.4	78654.1	89297.1	97656.1	110198	117850	115293	122429	114960	114850	20974.5	12354.7	25201.8	102079	100445	97240.8	141025	142363	142498	143568	112104	140749	7364.44	9771.31	23353.1	79863.6	103446	106961	145414	156024	144376	157032	145810	154750
met_3745	306.003	2.403	19.973	158.41	Unknown	Unknown	15458.9	15387.2	28156.6	18755.5	29989	15491.3	15561.9	19759.3	14442.5	14781.2	9535.99	7930.82	17461.9	19557	17518.3	11871.5	13136.9	34236.4	22515.4	8951.66	8497.63	19913.8	17881.1	11891.8	18232.6	20472.3	15604	14182.9	8702.07	13570.3	29166.3	15878.7	12413.3	10305.9	11422.2	22149.8
met_6698	320.899	2.415	21.535	170.62	Unknown	Unknown	136689	155509	140098	10565.6	16101.8	97656.1	110198	117850	115293	122429	114960	114850	200928	174561	166492	11167.4	16029.4	14286.6	141025	142363	12310.5	143568	17547.1	140749	172799	201159	10698.8	79863.6	11895.4	15572.1	145414	156024	144376	157032	145810	13907.7
met_1661	445.993	2.443	25.544	200.48	Unknown	Unknown	62543	137620	129731	78654.1	89297.1	97656.1	110198	117850	115293	122429	114960	114850	44341.1	66577.1	66470.7	102079	100445	97240.8	141025	142363	142498	143568	112104	140749	107224	128680	44825.8	79863.6	103446	106961	145414	156024	144376	157032	145810	154750
met_3271	512.816	2.45	25.036	195.7	Unknown	Unknown	15619.7	15855.4	17690	20333.8	14332.4	17379	16576.4	14725.4	24228.9	16578.3	16657.7	16129.2	18300.3	14860.3	10152.5	12244	28748.3	17758	14746.5	16793.7	18749	21423.8	19444.7	24494	20585.4	20654.8	18086.9	21489.6	17943.4	30060.3	29332.7	14260.6	22176.3	20758.8	34460.3	22234.2
met_8347	272.031	2.462	19.019	151.52	Unknown	Unknown	13548.7	13426.1	16665.4	78654.1	89297.1	97656.1	110198	117850	115293	122429	114960	114850	14325.3	14731.2	6131.59	102079	100445	97240.8	141025	142363	142498	143568	112104	140749	11922.1	9740.94	5510.61	79863.6	103446	106961	145414	156024	144376	157032	145810	154750
met_671	309.978	2.525	20.047	158.9	Unknown	Unknown	226512	182106	256761	78654.1	89297.1	97656.1	110198	117850	115293	122429	114960	114850	163307	357470	166492	102079	100445	97240.8	141025	142363	142498	143568	112104	140749	172799	1287471	265260	79863.6	103446	106961	145414	156024	144376	157032	145810	154750
met_4883	306.003	2.582	19.967	158.35	Unknown	Unknown	11630.6	9478.15	9626.29	12206	14730	14522.9	11160.8	9952.7	9804.36	13174.5	8865.76	11496.9	10912.5	13613.7	11870.3	16600.3	15221	6927.82	12084.6	14253.9	17833.7	10999.6	9099.51	19204.6	11090	10873.6	8807.92	12371.2	11024.2	14913.4	6340.5	12399.8	12445.2	7166.81	6000.95	13573.4
met_5364	299.002	2.622	19.529	154.97	Unknown	Unknown	10372.8	13015.4	9275.95	9478.96	7682.16	11728.6	11384.5	9818.43	7139.79	10263.2	10475.2	9170.42	11797.6	7493.91	9926.98	14581.1	9480.57	12535.7	9814.2	8013.74	9371.05	12435.3	11788.2	13651.5	10985.2	7989.57	4725.86	11791.8	10156	18569.2	10478.5	13845.3	12930.7	9978.9	11130.3	8923.59
met_2433	229.972	2.654	19.256	154.72	Unknown	Unknown	22803.2	13311	18844.3	13500.6	35446.3	30429	19671.7	19057.1	45406.5	21505.1	26396.2	19718.2	20719	18966.3	28367.7	18818.7	21115.1	13905.8	34843.5	27579.8	26915.2	13422.9	19455.2	26721.5	23398.5	22046.6	24487.4	18671.3	27237.1	32363.8	30607.8	21998.1	26368.9	21304.3	17801.8	30715.4
met_3440	482.159	2.674	26.714	209.33	Unknown	Unknown	13147.1	12730.1	13859.4	24613.2	16595.5	13566.1	6382.75	21865.6	18372.2	24531.5	8735.74	14856.2	19952	20901.2	3878.05	14735.7	19117.3	14246.6	7423.36	18569	16952.6	30440.5	10547.4	20000.9	22864.9	50199.3	20921.4	15387.2	103446	12520.6	24366.6	44676.9	46892.5	34428.2	31375.3	42814.4
met_1216	369.227	2.69	23.612	186.31	10,11-dihydro-20-dihydroxy-LTB4, [M-H]1-; 19R-hydroxy-PGE1, [M-H]1-; 19R-hydroxy-PGF2alpha, [M-H]1-; 20-hydroxy-PGF2alpha, [M-H]1-; TXB2, [M-H]1-	PG-like, [M-H]1-	24323.2	26596.8	22343.3	38653.6	32618.3	34820.2	31620.4	40706.7	44818.9	36734.7	33078.2	51054.7	54948.2	30659	35452	48521.6	31171.1	36430.1	31761.3	32042.8	30365.4	48571.2	35761.8	50781.7	54804.4	71624.8	67863.5	48446	47428.4	53062.8	74726.2	78369.7	80520.5	64984.2	80441.4	80574.1
met_1840	217.003	2.697	23.738	191.87	Unknown	Unknown	65435.4	54179.7	140098	78654.1	10702.8	97656.1	71799	117850	17606.2	75756	114960	22764.6	104351	62787.7	33139	102079	100445	97240.8	141025	142363	142498	29650.2	112104	140749	160780	46631.7	47685.6	79863.6	103446	106961	47448.3	23988.7	144376	157032	145810	154750
met_2012	475.98	2.699	24.175	189.28	Unknown	Unknown	41746.8	16351.3	20582.5	27242.8	8798.17	14160.6	29321.2	31280	40922.4	24751	58952.5	74275.6	21491.4	25786.3	21390.7	24358.5	17739.4	21311	21977.5	26553.1	34458.1	41925.8	30935	11795.9	27666.5	26656.5	6999.91	14160.4	28935.2	37600.4	28613.3	27186.1	22005.3	46597.1	7753.95	21098.8
met_1804	369.227	2.734	24.395	192.56	10,11-dihydro-20-dihydroxy-LTB4, [M-H]1-; 19R-hydroxy-PGE1, [M-H]1-; 19R-hydroxy-PGF2alpha, [M-H]1-; 20-hydroxy-PGF2alpha, [M-H]1-; TXB2, [M-H]1-	PG-like, [M-H]1-	7908.37	9006.24	5156.98	20901.3	22798.2	18524.5	35984.2	37802.2	36199.1	38776.8	52793	42633.4	13701.4	12180.4	22792	26300.9	39406.6	37078.3	40886.6	40940.2	27946.3	37610.3	29447.7	25503.4	11404.1	7030.38	17641.7	29446.8	26992.9	24132.4	66706	88141.7	80322.6	47705.7	70070.7	79523.6
met_2466	303.9	2.783	20.249	160.65	Unknown	Unknown	28753.1	27838.5	27176.9	23674.5	44002.3	27211.1	27930.6	32608.3	28554.8	22127.8	51032.6	23542.4	23581.4	26077	26320.6	38517.9	26590.9	15781.8	19900.3	28064	38613.7	30710.5	55546.4	23624	27440.1	16134.2	23894.1	19292.7	57286.1	28990.7	25890	31701.6	44408.7	15049.3	19410.3	27522
met_2572	273.04	2.802	19.915	158.71	Unknown	Unknown	29919.8	23522.1	117802	78654.1	89297.1	97656.1	110198	117850	115293	122429	114960	114850	47737.5	23991.6	65399.6	102079	100445	97240.8	141025	142363	142498	143568	112104	140749	172799	84549	87182.2	79863.6	103446	106961	145414	156024	144376	157032	145810	154750
met_4173	533.845	2.867	24.756	193.29	Unknown	Unknown	18007	11497.4	10139.2	22307.1	10381.3	15822.8	9623.38	10619.5	9422.38	13934.9	10701.6	9691.78	6871.76	10747.4	23802.5	18812.3	6040.4	16690.4	15998.3	531.065	16205.7	12542.8	13330	13915.2	11325.8	9711.49	12987.5	11420.4	15092.8	12592	8840.53	11669	14292.2	13710	13471	12775.5
met_1741	229.972	2.911	19.265	154.8	Unknown	Unknown	34347.8	25522.5	39804.7	29952.1	24583	31448.6	21656.2	24631.2	27788.8	64651.2	29857.2	34604.3	23422.6	25462.1	25063.6	22434.1	27346.3	42356.8	43361.5	38248.4	21688.8	22591.2	38189	36739	31538.4	31736.3	42020.4	38317.7	29095.2	34837.5	56969.6	33930.9	32369	40631.5	39770	38150.4
met_3161	273.04	2.948	19.92	158.76	Unknown	Unknown	32542.3	34646.1	24729.7	78654.1	89297.1	97656.1	110198	117850	115293	122429	114960	114850	31475	48808.2	40488.5	102079	100445	97240.8	141025	142363	142498	143568	112104	140749	44063.1	74567.3	35997.8	79863.6	103446	106961	145414	156024	144376	157032	145810	154750
met_1913	309.978	2.994	20.038	158.84	Unknown	Unknown	77722.4	142281	71544.9	78654.1	89297.1	97656.1	110198	117850	115293	122429	114960	114850	51303.2	37766	106237	102079	100445	97240.8	141025	142363	142498	143568	112104	140749	161182	201159	171199	79863.6	103446	106961	145414	156024	144376	157032	145810	154750
met_10044	370.23	3.094	23.958	189.05	Unknown	Unknown	136689	155509	140098	78654.1	89297.1	97656.1	2808.32	117850	115293	9891.24	3096.48	3742.41	200928	174561	166492	102079	100445	97240.8	22765.8	142363	1815.77	143568	3146.37	3338.82	172799	201159	171479	79863.6	103446	106961	145414	156024	144376	8525.97	17813.1	154750
met_2844	217.003	3.115	23.743	191.93	Unknown	Unknown	54781.2	41912.6	140098	78654.1	89297.1	97656.1	110198	117850	115293	122429	114960	54821.2	200928	30424	47572.8	102079	28872.5	97240.8	141025	46408.1	142498	29846.3	112104	140749	32704.3	37960.7	49920.9	79863.6	103446	106961	36664.8	156024	144376	157032	145810	154750
met_2047	303.9	3.176	20.242	160.61	Unknown	Unknown	21801.1	24581.1	33817.4	28810.6	39456	20576.2	31713.5	28566.2	32908.7	34022.5	37033.6	62317.1	42745.2	24955.1	12574.4	15497.7	26780	25446.3	34350.9	29758.6	19581	27207.5	34198.2	36344.5	32885.2	43224	33198.9	28360.6	18392	28769.4	23629.3	17151.6	42733.8	36325.5	36130.4	58749.7
met_4238	306.003	3.194	19.974	158.41	Unknown	Unknown	11740.7	11906.9	12682.3	12182.6	4566.94	11808.7	10369.5	9354.5	11457.1	10624.1	15729.8	4114.08	12998.8	10178.6	12407.9	16760.3	12097.9	10125.2	6279	15141.3	19446.9	14540.1	13383.1	22159.9	10922.6	18371.8	18843.2	14263.6	25476.2	6666.53	18680.2	7342.54	17314.4	13859.3	7492.36	7048.05
met_2767	553.874	3.231	26.068	203.45	Unknown	Unknown	14116.1	12017.4	35460.7	21629.4	14197.9	23251.9	21963.6	28363.1	20985.8	26501.5	16344.9	33166.1	23849.2	19550.9	32381.5	27649.2	23040.9	24111.9	29558.7	23661.7	29035	30661	23861.5	23926	31163.8	23255.2	24391.9	26045.5	20188.5	30528.7	25758.9	19176.3	43608.6	37916.8	27282.9	28007.5
met_5382	264.157	3.277	22.178	177.29	Unknown	Unknown	9356.52	10906	10659.9	33274	17907.1	16057.7	8945.19	9810.15	13989.8	14325.1	13578.1	11504.7	6777.72	8467.8	7890.3	7930.73	10697.3	8915.76	3373.14	7741.6	4238.9	3870.34	9075.8	3983.48	9774.65	7748.6	9557.23	5016.15	10956.8	15420	2797.08	3844.03	9603.13	7207.42	4014.41	5723.3
met_1105	415.129	3.278	23.846	187.44	Unknown	Unknown	62441.7	43328.3	43528.8	199551	78026.3	104532	48735.3	69299.3	63836.4	78430.6	71090.1	76182.2	24028.3	22712.1	34096.2	26402.4	19739	29965.7	20097.3	17090.4	30043.5	20568.6	19639.3	20424.7	26169.5	17040.4	17024	33295.2	54651.6	82629.5	22917.8	23401.9	21288.9	24483	28042.8	35059.4
met_122	242.176	3.278	19.595	157.06	Unknown	Unknown	706993	565504	555095	2045407	952216	1051949	602592	747413	724774	866200	826221	803552	266408	283522	407232	247387	188435	259766	248744	209236	365410	229219	228710	234097	272029	224810	179288	324034	627451	911257	237670	267622	242825	235517	312737	368980
met_1517	415.128	3.278	25.519	200.74	Unknown	Unknown	40324.2	34315.5	30559.2	129640	55805.2	74023.1	35321.2	50652.9	48133.9	55654.1	48708.1	45632.6	17610.9	14649.2	25553.9	16464.4	12264.3	15747.3	12134.9	9967.76	20081.9	14391.2	13636.6	11870.3	18194.3	12374.4	11733.8	19209.5	45834.7	57294.4	16329.6	16091.3	12356	17894.8	20763.1	25185
met_3707	273.04	3.278	19.911	158.68	Unknown	Unknown	63170.1	94798.4	35097.3	78654.1	89297.1	97656.1	110198	117850	115293	122429	114960	114850	13688.5	42940.2	46803.1	102079	100445	97240.8	141025	142363	142498	143568	112104	140749	172799	30543.9	34076.4	79863.6	103446	106961	145414	156024	144376	157032	145810	154750
met_2842	369.227	3.309	25.524	201.56	10,11-dihydro-20-dihydroxy-LTB4, [M-H]1-; 19R-hydroxy-PGE1, [M-H]1-; 19R-hydroxy-PGF2alpha, [M-H]1-; 20-hydroxy-PGF2alpha, [M-H]1-; TXB2, [M-H]1-	Unknown	136689	155509	140098	78654.1	89297.1	97656.1	24465.5	29672	30163.7	25403.2	35573.2	28181.7	200928	174561	166492	102079	100445	97240.8	141025	37237.7	38286.8	56000.4	24526	29645.4	172799	201159	171479	79863.6	103446	106961	41180.7	156024	144376	48825.6	85749.1	154750
met_5857	369.227	3.311	28.245	223.29	10,11-dihydro-20-dihydroxy-LTB4, [M-H]1-; 19R-hydroxy-PGE1, [M-H]1-; 19R-hydroxy-PGF2alpha, [M-H]1-; 20-hydroxy-PGF2alpha, [M-H]1-; TXB2, [M-H]1-	Unknown	136689	155509	140098	78654.1	89297.1	97656.1	6416.21	6240.28	8251.47	10444.4	7488.32	10389.1	200928	174561	166492	102079	100445	97240.8	14393.2	142363	12560.7	14172.9	3346.96	12118.6	172799	201159	171479	79863.6	103446	106961	17927.2	11791.4	18076.2	12298	13782.4	17023.5
met_199	542.181	3.312	28.35	221.58	Unknown	Unknown	231973	210506	211917	73214	64088	6867.16	264391	450306	340725	397359	491927	373678	321331	385965	347046	11795.2	14798.7	13152.2	514309	443318	561368	745141	560934	570393	408457	446721	494799	48725.7	10215.2	11219.5	829474	835376	959665	810788	724067	884721
met_3401	307.191	3.312	22.432	178.14	14,14,14-Trifluoro-11E-tetradecenyl acetate, [M-H]1-	Unknown	136689	155509	140098	78654.1	89297.1	97656.1	7852.06	11527.5	9060.07	18745	21611	9869.13	200928	174561	166492	102079	100445	97240.8	29305.9	11459.9	21574.7	26506.9	27377.5	14114.5	172799	201159	171479	79863.6	103446	106961	42361	43885.9	38755.4	33267.4	44954.6	16270.6
met_8375	289.18	3.312	23.872	190.22	4-oxo-9Z,11Z,13E,15E-octadecatetraenoic acid, [M-H]1-; 8-hydroxy-13Z-octadecene-9,11-diynoic acid, [M-H]1-; 8-oxo-9,11-octadecadiynoic acid, [M-H]1-; 8-hydroxy-17-octadecene-9,11-diynoic acid, [M-H]1-; 8-hydroxy-17-octadecene-10,12-diynoic acid, [M-H]1-	Unknown	136689	155509	140098	78654.1	89297.1	97656.1	110198	117850	3948.75	4616.02	6399.04	114850	200928	174561	166492	102079	100445	97240.8	8103.68	8557.2	142498	10506.1	3499.22	8369.81	172799	201159	171479	79863.6	103446	106961	145414	10917.4	11380.7	3735.06	16443.9	10253.8
met_1432	423.146	3.313	26.388	207.53	Unknown	Unknown	136689	155509	140098	78654.1	89297.1	97656.1	35949.6	43368.3	55261.5	39681.9	47981.9	61079.8	200928	174561	166492	102079	100445	97240.8	49254.4	65313.8	54724.3	90216.3	71012	59118.7	172799	201159	171479	79863.6	103446	106961	69223.7	106295	95969.5	60030.6	109384	83551.1
met_1638	513.227	3.313	27.829	217.79	Unknown	Unknown	136689	155509	140098	78654.1	89297.1	97656.1	16873.2	36641.9	34721	33180.4	33407.2	35583.5	200928	174561	166492	102079	100445	97240.8	38604.6	72042.2	36247.9	119637	47488.3	52376.4	172799	201159	171479	79863.6	103446	106961	61943.9	66637.8	52803.8	58816.5	118119	59265.4
met_1892	289.18	3.313	22.019	175.27	4-oxo-9Z,11Z,13E,15E-octadecatetraenoic acid, [M-H]1-; 8-hydroxy-13Z-octadecene-9,11-diynoic acid, [M-H]1-; 8-oxo-9,11-octadecadiynoic acid, [M-H]1-; 8-hydroxy-17-octadecene-9,11-diynoic acid, [M-H]1-; 8-hydroxy-17-octadecene-10,12-diynoic acid, [M-H]1-	Unknown	136689	155509	140098	78654.1	89297.1	97656.1	19664.7	39028.5	115293	37809.7	17102	42269.8	200928	174561	166492	102079	100445	97240.8	76892	48715.1	49645.5	29677.6	112104	25981.5	172799	201159	171479	79863.6	103446	106961	77692.1	99270.3	89687.7	70935.1	70096.4	25649
met_2550	489.182	3.313	26.348	206.35	Unknown	Unknown	136689	155509	140098	78654.1	89297.1	97656.1	110198	26448.8	23427.4	19197.4	24709	30769.1	200928	174561	166492	102079	100445	97240.8	35920.1	19249.1	27795.2	36710.6	22428.9	38578.2	172799	201159	171479	79863.6	103446	106961	40203.9	49153.3	44519.5	34411.4	49448.4	37020.5
met_4421	315.196	3.313	23.921	189.91	preclavulone lactone I, [M-H]1-; 8-deoxy-J2-IsoP, [M-H]1-; ent-15-deoxy-J2-IsoP, [M-H]1-; 5-deoxy-J2-IsoP, [M-H]1-; 12-deoxy-J2-IsoP, [M-H]1-; PGA2 1,15-lactone, [M-H]1-; 15-deoxy-delta-12,14-PGJ2, [M-H]1-; 15-deoxy-delta-12,14-PGA2, [M-H]1-	Unknown	136689	155509	140098	78654.1	89297.1	97656.1	6686.58	117850	10267.4	15785.8	12211.6	12290.7	200928	174561	166492	102079	100445	97240.8	15541.6	12770.3	15597.6	20241.7	17277.4	19442.3	172799	201159	171479	79863.6	103446	106961	23664.2	32500.5	28844.3	20984.5	24039.8	26007.3
met_906	467.204	3.313	26.217	205.56	Unknown	Unknown	30585.7	35233.1	28608.1	78654.1	4021.11	6278.98	72785.1	55266.2	51232.9	56773.2	84442.4	91710.8	58849.8	46763.3	47105.2	6460.92	14412	13740.4	105333	103647	99535.3	119613	116953	113550	74557.3	74612	84752.6	11576.9	13047.1	13610.9	149780	197134	196351	85502.6	172413	149984
met_1724	351.217	3.314	23.936	189.23	10,11-dihydro-Resolvin E1, [M-H]1-; 12-epi-12-iso-LGD2, [M-H]1-; 12-epi-12-iso-LGE2, [M-H]1-; 13,14-Dihydro-15-oxo-lipoxin A4, [M-H]1-; 13,14-dihydro-15-keto-LXA4, [M-H]1-; 13,14-dihydro-15-keto-PGD2, [M-H]1-; 13,14-dihydro-15-keto-PGE2, [M-H]1-; 15-keto-PGE1, [M-H]1-; 15-keto-PGF2alpha, [M-H]1-; 20-hydroxy LTB4, [M-H]1-; 5,14,15-trihydroxy-6,8,10,12-Eicosatetraenoic acid, [M-H]1-; 5-epi-5-iso-LG…	PG-like, [M-H]1-	33005.1	30230.2	29403.9	21964.4	20370.9	17332.9	25538.6	36417.7	34436.2	24064.7	33546.2	41575	58501.1	53363.6	51634.7	22200.4	20689.4	24592.5	45489.1	47233.1	36103.3	78042.4	55128.6	55535	54823.6	61838.9	57649.8	20196.9	22184.9	20795	54594.2	74554.1	68878.1	48609.9	80899.7	83459.5
met_1968	327.217	3.314	22.812	180.73	11-hydroperoxy-12,13-epoxy-9-octadecenoic acid, [M-H]1-; 9,12,13,TriHODE, [M-H]1-; 9-hydroperoxy-12,13-epoxy-10-octadecenoic acid, [M-H]1-; 9S,10S,11R-trihydroxy-12Z,15Z-octadecadienoic acid, [M-H]1-; 9S,11R,15S-trihydroxy-2,3-dinor-13E-prostaenoic acid-cyclo[8S,12R], [M-H]1-	Unknown	136689	155509	140098	78654.1	89297.1	97656.1	110198	117850	27362.2	122429	13759	114850	200928	174561	166492	102079	100445	97240.8	59962.6	74629.6	28135.5	150007	39645.7	79078.9	172799	201159	171479	79863.6	103446	106961	44675.1	22052.8	19368	30816.4	20706.3	16734.9
met_2666	333.206	3.314	23.918	189.47	5Z,8Z,11Z,14Z-Eicosatetraenedioic acid, [M-H]1-; 18S-Resolvin E3, [M-H]1-; 11,18-di-HEPE, [M-H]1-; 12,18-di-HEPE, [M-H]1-; 8,18-di-HEPE, [M-H]1-; Resolvin E2, [M-H]1-; 18R-HpEPE, [M-H]1-; 15S-HpEPE, [M-H]1-; 12S-HpEPE, [M-H]1-; 5S-HpEPE, [M-H]1-; 5,6-Ep-15S-HETE, [M-H]1-; ent-15-J2-IsoP, [M-H]1-; 15-epi-15-A2t-IsoP, [M-H]1-; ent-8-J2-IsoP, [M-H]1-; ent-12-J2-IsoP, [M-H]1-; ent-5-J2-IsoP, [M-H]1-;…	PG-like, [M-H]1-	23939.8	26153	24159.7	15222.7	16584.5	14509	18683.6	18351.1	18856.1	18044.4	18420.3	34015.3	44088	36213.6	32570.4	24064.8	18758.4	19534	25592.2	24603.7	27431	46992.2	28505.8	33551.1	42518.7	44776.9	38599.6	26066.1	29939.4	31776.2	41574.7	36810.2	45374	34128.2	39953.5	42372.2
met_3138	538.186	3.314	28.072	219.44	Unknown	Unknown	136689	155509	140098	78654.1	89297.1	97656.1	12423.3	19272.9	19249.2	15332.6	17418.3	25605.1	200928	174561	166492	102079	100445	97240.8	26107.2	20119.9	24326.4	35447.5	23075.4	15804.2	172799	201159	171479	79863.6	103446	106961	30226.2	50228	41835.3	26132.9	37903.8	29726
met_1691	483.166	3.315	27.428	214.96	Unknown	Unknown	136689	155509	140098	78654.1	89297.1	97656.1	29884	117850	37164.8	33865.4	47412.8	47476.1	200928	174561	166492	102079	100445	97240.8	42279.4	47909.8	48307.3	63703.3	45235	60156.7	172799	201159	171479	79863.6	103446	106961	89262.9	98181.4	92465.2	55337.2	85629.4	70279.5
met_1848	564.162	3.315	28.568	223.09	Unknown	Unknown	31976.7	31706.5	28763.2	16149.5	18104.4	14606.1	20552.8	30230.8	29335.3	36403.2	45156.6	40703.9	51311.7	49810.1	48069.8	22309.5	22129	22627.3	44316.8	53879.8	37821.6	54988.3	45186.1	51079.8	51765.7	56907.2	56434.6	14978.8	20737.7	15168.7	66154	64691.3	68583.2	58330.3	64775.8	60052.1
met_1907	656.121	3.315	29.862	232.53	Unknown	Unknown	136689	155509	140098	78654.1	89297.1	97656.1	19421.2	22922.8	32095.5	27272.5	34256.6	58846.6	200928	174561	166492	102079	100445	97240.8	36676.1	37015.4	44005	57676.9	43512.3	59605.4	172799	201159	171479	79863.6	103446	106961	81726.9	69581.1	55258.4	50084.6	63126.7	52420
met_2756	613.102	3.316	29.64	231.11	Unknown	Unknown	136689	155509	140098	78654.1	89297.1	97656.1	21285.2	8227.44	5115.48	25626.6	28456.8	21588.8	200928	174561	166492	102079	100445	97240.8	24225.6	24856.4	25309.5	48607.1	19541.9	32090.8	172799	201159	171479	79863.6	103446	106961	50934.7	70206.4	25982.5	31587	41968	29898.8
met_5949	533.232	3.316	27.903	218.15	Unknown	Unknown	136689	155509	140098	78654.1	89297.1	97656.1	10999.5	6611.94	15327.5	6534.94	7108.19	14101.9	200928	174561	166492	102079	100445	97240.8	8366.88	8493.84	8154.36	15265.9	10814.5	13970.8	172799	201159	171479	79863.6	103446	106961	15225.7	3179.12	16633.9	2625.4	17923.6	14551.3
met_1361	518.127	3.317	26.837	209.89	Unknown	Unknown	136689	155509	140098	78654.1	89297.1	97656.1	33390.4	47647.7	43937.3	64036.3	48232	90119	200928	174561	166492	102079	100445	97240.8	54062.8	142363	59252.1	80765.1	41648.5	62372.7	172799	201159	171479	79863.6	103446	106961	72125.5	237689	76062.5	69032.3	79694.1	79950.7
met_4755	267.054	3.318	27.482	220.11	Unknown	Unknown	136689	155509	140098	78654.1	89297.1	97656.1	3959.58	10164	7778.88	4653.06	4662.73	10010.6	200928	174561	166492	102079	100445	97240.8	16192.3	142363	14785.1	20283.5	16011	20354.8	172799	201159	171479	79863.6	103446	106961	18965	33649.3	25897.3	17854	35033.7	22083.1
met_6016	553.081	3.318	29.54	230.9	Unknown	Unknown	136689	155509	140098	78654.1	89297.1	97656.1	3706.6	4751.43	115293	3474.18	114960	114850	200928	174561	166492	102079	100445	97240.8	28454.7	142363	15803.7	17314.9	15501.5	13564.2	172799	201159	171479	79863.6	103446	106961	145414	21372.5	12858	18060.7	21397.3	20918.4
met_2250	423.147	3.319	27.352	215.19	Unknown	Unknown	136689	155509	140098	78654.1	89297.1	97656.1	24656.1	117850	9651	29519.9	35194.1	30848.1	200928	174561	166492	102079	100445	97240.8	43898.8	54167.1	34915.2	43249.8	40055.2	48514.6	172799	201159	171479	79863.6	103446	106961	44135.1	79344.4	144376	32793.1	72317.9	58874.9
met_302	451.231	3.319	25.887	203.14	10,11-dihydro-20-dihydroxy-LTB4, [M-H+CH3COONa]1-; 19R-hydroxy-PGE1, [M-H+CH3COONa]1-; 19R-hydroxy-PGF2alpha, [M-H+CH3COONa]1-; 20-hydroxy-PGF2alpha, [M-H+CH3COONa]1-; TXB2, [M-H+CH3COONa]1-	Unknown	156881	157646	146670	73243.2	50844.9	52079.1	173812	219068	252214	202635	239562	414926	292924	259929	268906	92355.8	67930.7	102720	306664	393998	279802	399317	255347	710102	283577	271884	291162	88570	178291	71096.1	579500	792427	430570	360862	484693	308810
met_189	482.159	3.322	26.382	206.67	Unknown	Unknown	213039	192677	180005	73214	64088	6867.16	535442	386252	446289	378258	311898	471670	4659.34	372266	335043	12013.9	15707.1	13518.8	468566	486468	591446	662192	668101	653655	2858.54	428487	480448	10148.2	10546.6	14448	738962	899344	920289	951981	859361	805628
met_44	369.227	3.331	23.89	188.51	10,11-dihydro-20-dihydroxy-LTB4, [M-H]1-; 19R-hydroxy-PGE1, [M-H]1-; 19R-hydroxy-PGF2alpha, [M-H]1-; 20-hydroxy-PGF2alpha, [M-H]1-; TXB2, [M-H]1-	PG-like, [M-H]1-	1.79423e+06	1.5257e+06	1.58291e+06	1.17305e+06	992060	1.06521e+06	1718477	1755996	2220234	2023034	2491572	2534901	15212.1	1.33093e+06	1.39053e+06	86368.4	80296.7	60857.3	3151661	2314237	3008669	3906117	2951416	3397933	2.15503e+06	13560.2	1993998	1.50309e+06	71601.1	73985.4	4254901	4934361	4481666	3257668	4605370	4343083
met_6022	564.162	3.337	29.679	231.86	Unknown	Unknown	6991.69	10438.9	8880.73	9333.12	10210.6	9270.98	10502.3	4757.4	9280.56	5150.97	15535.6	14004.1	11145.9	6596.09	9369.83	9990.49	7876.52	8441.15	16765.1	15552.5	701.796	25906.9	10514	15089.5	11077	9975.98	9916.44	10903.7	11774.3	10987.7	2895.66	4811.85	17099	18871.7	3318.11	3014.98
met_6961	518.126	3.338	28.464	222.74	Unknown	Unknown	136689	155509	140098	78654.1	89297.1	97656.1	7275.28	117850	4774.28	9907.98	114960	12468.7	200928	174561	166492	102079	100445	97240.8	8365.07	16962.1	7414.38	14097.2	6688.69	140749	172799	201159	171479	79863.6	103446	106961	21175.6	156024	26015.9	157032	2874.15	19476.8
met_787	369.227	3.34	24.902	196.6	10,11-dihydro-20-dihydroxy-LTB4, [M-H]1-; 19R-hydroxy-PGE1, [M-H]1-; 19R-hydroxy-PGF2alpha, [M-H]1-; 20-hydroxy-PGF2alpha, [M-H]1-; TXB2, [M-H]1-	PG-like, [M-H]1-	48287.4	50693.1	36216.7	126042	39924.2	32946	48114.2	69836.8	92702.7	51252.4	60182.7	91457.5	74724	66975.9	42961.3	48717.4	14412	74775.8	174532	104751	92358.2	122791	88701.3	217547	90086.4	81193.4	78410.8	54144.8	62917.2	45323.2	90756.8	243567	211509	87144.2	141049	284516
met_2553	303.9	3.356	20.241	160.6	Unknown	Unknown	31588.3	18841.6	29829.2	28283.8	49648.1	22800.3	20182.3	24334.9	21957.3	19166.2	29260.7	18254.5	40575.8	21738.5	17930.7	12699.1	19941.7	37868.4	26651	23100.6	23225.7	28029.6	31186.2	13143	34383.5	18607.3	34458.6	30273.7	27774.8	49325.3	30095.8	28062.1	36362.3	35522.6	17385.4	43612.1
met_2202	273.04	3.416	19.895	158.58	Unknown	Unknown	120582	56740.3	101810	78654.1	89297.1	97656.1	110198	117850	115293	122429	114960	114850	113261	17368.6	6055.15	102079	100445	97240.8	141025	142363	142498	143568	112104	140749	68167.1	36459.6	38640.4	79863.6	103446	106961	145414	156024	144376	157032	145810	154750
met_1290	370.231	3.469	23.944	188.94	Unknown	Unknown	136689	155509	140098	78654.1	89297.1	97656.1	42878.9	117850	115293	68277.6	44713.3	137880	200928	174561	166492	6024.32	100445	97240.8	77932.4	142363	123309	139750	109822	109528	172799	201159	171479	79863.6	103446	106961	145414	156024	144376	157032	254990	221056
met_4762	249.978	3.479	20.535	164.45	Unknown	Unknown	7215.34	9853.02	15230.3	16181.6	4918.58	5871.23	6994.09	9470.91	6925.18	12543.3	11083.4	8371.84	7828.69	14631.5	9882.05	10113.4	7988.11	10880.3	11041.6	6131.77	13629.1	11520.3	12693.3	9694.25	11484.4	6502.06	10955.5	10495.1	13018	10096.2	9438.98	6971.82	9834.61	8069.88	13968.4	10981.7
met_918	325.201	3.54	23.893	189.45	2,3-Dinor-8-iso-PGF2alpha, [M-H]1-; 2R-HpOTrE, [M-H]1-; 9K,12,13-diHODE, [M-H]1-; 2,3-dinor-PGE1, [M-H]1-; 2,3-dinor-11b-PGF2alpha, [M-H]1-	Unknown	136689	155509	140098	78654.1	89297.1	97656.1	110198	117850	72319.2	70081.9	101145	65841	200928	174561	166492	102079	100445	97240.8	67738.2	99341.3	142498	93651.8	120488	99648.4	172799	201159	171479	79863.6	103446	106961	306421	328837	144376	91975.2	291660	154190
met_3083	303.9	3.551	20.254	160.71	Unknown	Unknown	20083	20773.3	30992.7	20001.2	24745.4	25684.6	22725.4	21221.7	20787.4	26893.5	23339.1	18476.8	21938.7	18154.8	20282.8	42883.9	20559.9	32641.2	23398.5	19427.9	33552.1	13770.1	20482	25894.6	21605	41617.4	16089	20393.4	29180.1	15905.9	21157	12542.1	19844.6	18770.7	25866.3	22063.8
met_3988	309.977	3.628	20.049	158.93	Unknown	Unknown	136689	31031.1	36432.3	78654.1	89297.1	97656.1	110198	117850	115293	122429	114960	114850	15209.9	35310.7	59900.6	102079	100445	97240.8	141025	142363	142498	143568	112104	140749	64168.8	51104.8	52232.2	79863.6	103446	106961	145414	156024	144376	157032	145810	154750
met_93	369.227	3.678	23.839	188.13	10,11-dihydro-20-dihydroxy-LTB4, [M-H]1-; 19R-hydroxy-PGE1, [M-H]1-; 19R-hydroxy-PGF2alpha, [M-H]1-; 20-hydroxy-PGF2alpha, [M-H]1-; TXB2, [M-H]1-	PG-like, [M-H]1-	409583	379080	435125	131131	226904	225664	733096	548327	765724	871489	1445254	1240635	246129	88530.8	84986.4	118101	164952	155248	862721	871529	909498	1792543	1.04093e+06	1727115	89847.3	293285	100727	133518	23573.5	287180	2246809	2623302	2458294	2169232	2228730	775222
met_268	482.16	3.695	26.496	207.59	Unknown	Unknown	136689	155509	140098	78654.1	89297.1	97656.1	110198	716647	203530	623050	114960	146915	200928	174561	166492	102079	100445	97240.8	131266	211698	612800	1018671	263832	532463	172799	201159	171479	79863.6	103446	106961	145414	1119842	1097695	331252	631515	299947
met_4258	402.901	3.708	23.27	183.03	Unknown	Unknown	14296.1	13419.1	8546.84	17276.6	10297.9	17655.4	10918.1	10595.7	9588.88	12919.6	12495.7	10479.2	7590.26	8873.2	12590	13786.3	20800	13515.2	25553.6	15125.1	11070.4	11264.3	28193.3	22433.6	12082.1	14129.3	11192.5	12687.1	9996.41	12270.3	11612.8	10330	11809.9	11208.7	8784.91	8711.55
met_3030	347.945	3.729	21.218	167.54	Unknown	Unknown	13845.8	14002	15157.6	25211	12091.2	9171.83	14891.1	8925.01	28808.9	22682.7	27453.2	7835.58	15123.9	13658.1	29527.7	17380.9	14789.2	24892.4	17754.3	13151.4	29668.4	9303.26	9336.51	17626.4	13269.3	12104.2	16216.2	12559.5	11895.6	15783.2	19364.2	11870.3	46867.7	17349.4	14838.5	21798.3
met_3788	256.236	3.786	20.774	166.18	Unknown	Unknown	30799.9	12268.8	13647.5	11345.8	12492.4	14261.1	17364.7	16927.2	11859.4	14939	8666.78	22793.7	12746.2	10931	30516.8	25226.3	17313.4	27854.2	20244.6	29925.7	22602.4	18743.6	16785.9	18162.5	31333.4	12574.7	19417.1	10748.3	9748.67	17480.2	16627.7	15992.7	18122.2	26723.2	17924.9	18242.7
met_2498	320.899	3.792	21.513	170.45	Unknown	Unknown	18840.4	23612	32353.2	20099.1	18840.9	36769.6	18975.6	33084.3	11030.8	20872.4	17275.5	18575.3	18373.6	16016.4	22021.9	31067.4	14821.9	15547.5	12909.2	16246.8	26830.2	20264.6	13035.9	27703.1	11891.7	34753.2	16013.2	18928.8	32479.2	34998.5	28104	11889.2	20379.2	17982.1	22210.2	18006.3
met_5596	635.876	3.842	27.451	213.72	Unknown	Unknown	8968.99	9234.92	12114.3	9342.49	18452.1	8089.02	7892.8	11099.8	8076.59	8944.87	9210.27	5432.98	11586.2	12662.4	6895.02	11838.6	10981.5	8739.51	8139	5889.39	8482.68	5240.07	4730.68	5880.96	8290.09	7228.64	21732.7	12553.2	9907.42	8121.71	18600.1	9552.39	7631.96	10025.8	9059.36	8249.87
met_3320	483.163	3.954	26.522	207.8	Unknown	Unknown	136689	155509	140098	78654.1	89297.1	97656.1	8768.2	15971.9	115293	122429	30503.1	114850	200928	174561	166492	102079	100445	97240.8	22380.9	142363	55703.9	143568	112104	37073.1	172799	201159	171479	79863.6	103446	106961	31614.4	117025	42153.7	67982.2	25454.1	154750
met_1714	229.972	3.956	19.262	154.79	Unknown	Unknown	34762.1	32279.7	25802.7	27502.3	33585.8	73224.3	37790	31488.8	55502.8	45218.5	32875.5	33207.6	33620.6	35767.1	16426	35416	30048.8	37863.8	41774.8	15334.2	26582.2	17625.2	40189.2	17294.8	33192.9	31487.3	25203.6	46264.5	39986.5	39474.9	22584.8	34489	18314	39320.5	42764.7	22737.3
met_2363	362.922	3.969	21.124	166.55	Unknown	Unknown	45869.8	20600.7	42840.6	27049.3	20441.9	16853.4	32040.5	14777.5	25544.1	34442.7	20103.4	19501.5	28304	23351.2	22344.5	22537	41177.1	24549.5	22341.7	31088.4	18132.3	24305.8	18007.4	24088.1	30452	24814.9	30600.5	20521.8	20998.6	19117.2	22378.5	23515.5	33116.6	40963.8	39169.7	20556.1
met_1059	369.227	4.017	24.892	196.52	10,11-dihydro-20-dihydroxy-LTB4, [M-H]1-; 19R-hydroxy-PGE1, [M-H]1-; 19R-hydroxy-PGF2alpha, [M-H]1-; 20-hydroxy-PGF2alpha, [M-H]1-; TXB2, [M-H]1-	PG-like, [M-H]1-	136689	155509	140098	78654.1	89297.1	97656.1	49901.3	117850	145144	56504.7	96098.2	114850	200928	174561	166492	102079	100445	97240.8	117533	159789	103575	95658.3	112104	315488	172799	201159	171479	79863.6	103446	2635.53	145414	107558	144376	118180	118512	293637
met_3878	306.003	4.05	19.971	158.39	Unknown	Unknown	13142.2	17615.9	16380.4	12001.9	14118.8	13714.8	12010.9	22879.5	13990.5	9151.56	10510.9	21571.5	19730.9	16936.6	18786.3	12927.8	13449.4	14375.3	14849.2	14848.4	40172.5	16925.8	19885.7	18695.3	16127.5	25712	27506.8	9384.78	16208.9	16722.5	15859.5	15264.1	16411.1	26366	20338.7	19137.5
met_179	369.228	4.091	23.934	188.87	10,11-dihydro-20-dihydroxy-LTB4, [M-H]1-; 19R-hydroxy-PGE1, [M-H]1-; 19R-hydroxy-PGF2alpha, [M-H]1-; 20-hydroxy-PGF2alpha, [M-H]1-; TXB2, [M-H]1-	PG-like, [M-H]1-	136689	155509	140098	78654.1	89297.1	97656.1	264180	294445	985996	781367	114960	505641	200928	174561	166492	102079	100445	97240.8	913321	585081	1069193	576467	112104	1295352	172799	201159	171479	79863.6	7675.99	106961	1672230	875927	144376	981020	1332115	1159384
met_3672	229.972	4.091	19.259	154.77	Unknown	Unknown	17526.8	47989.6	22920.2	14454.5	18470.5	14659.1	15911.3	21582.1	19784.3	16554.7	14268.2	18250.4	21971.6	20958.9	16154.1	20369	20595.7	20701.8	13300.3	14272.4	17691.2	15019.5	19873	14927.8	19811.7	19686.7	23752	16682.9	19911.1	19035.9	16541.8	15051.6	18394.4	18931.3	20245.5	17637
met_3734	483.163	4.147	26.575	208.21	Unknown	Unknown	136689	155509	140098	78654.1	89297.1	97656.1	9436.08	17985.9	9555.1	122429	114960	114850	200928	174561	166492	102079	100445	97240.8	141025	26413.5	55662.5	143568	112104	140749	172799	201159	171479	79863.6	103446	106961	49900.6	79867.1	37590.8	24543.7	30156.4	48631.1
met_1155	353.233	4.228	23.742	187.64	Troxilin B3, [M-H]1-; Trioxilin A3, [M-H]1-; 11,14,15-trihydroxy-5Z,8Z,12E-eicosatrienoic acid, [M-H]1-; 11,12,15-TriHETRE, [M-H]1-; 11,12,15S-trihydroxy-5Z,8Z,13E-eicosatrienoic acid, [M-H]1-; 13,14-Dihydro- lipoxin A4, [M-H]1-; (5Z,9E,12S,14Z)-8,11,12-trihydroxyicosa-5,9,14-trienoic acid, [M-H]1-; 8-iso-13,14-dihydro-15-keto-PGF2alpha, [M-H]1-; 8-iso-PGE1, [M-H]1-; 15-F2t-IsoP, [M-H]1-; ent-8-F…	PGF2alpha, [M-H]1-	53157.7	48988.8	46006.4	21871.1	13608.8	15513.5	34559.7	54806.5	50023.7	48943.2	52605.2	57745.3	92814.2	83919.8	73191.5	13822.3	16893.7	16864.9	77018.8	75072.8	81691	88076	67190.3	74852.2	89450.9	100293	90343.4	12555.4	21392.7	26005.1	128433	149371	126917	104743	120541	123208
met_722	369.227	4.238	24.881	196.43	10,11-dihydro-20-dihydroxy-LTB4, [M-H]1-; 19R-hydroxy-PGE1, [M-H]1-; 19R-hydroxy-PGF2alpha, [M-H]1-; 20-hydroxy-PGF2alpha, [M-H]1-; TXB2, [M-H]1-	PG-like, [M-H]1-	136689	155509	140098	78654.1	89297.1	97656.1	31972.7	117850	50544.2	41708.5	48149.9	114850	200928	174561	166492	102079	100445	97240.8	141025	72458.5	142193	239313	112104	161108	172799	201159	171479	79863.6	103446	106961	543579	214955	144376	437084	557786	259890
met_1866	229.972	4.274	19.254	154.71	Unknown	Unknown	19340.8	21131.4	21643.4	16413.7	43854.3	47784.4	14361.6	15515.1	25030	12333.3	14776.6	18437.2	33830.1	35372.3	52552.8	88787.3	26090.8	19620.8	19455.2	26895.8	21700.2	26858	35524.1	23503.6	28879.5	31022.3	18607.1	24763	44266.2	33201	23931.3	23465.1	20756.5	15132.9	15742.2	22710.8
met_6800	483.162	4.34	26.603	208.43	Unknown	Unknown	136689	155509	140098	78654.1	89297.1	97656.1	3180.51	10483.1	14285.6	122429	114960	114850	200928	174561	166492	102079	100445	97240.8	20894.7	142363	33626.1	143568	112104	140749	172799	201159	171479	79863.6	103446	106961	26822.4	21540.1	16691.3	157032	145810	19873.3
met_2637	475.98	4.376	24.184	189.35	Unknown	Unknown	34507.1	39080.9	20647.9	21706.6	27459	22842.1	21290.5	4157.53	22699.2	23560	32063.3	18626	22850	40951.2	34834.3	39747.9	20037.4	26635.2	18148	39925.4	23546.2	49733.7	22003.2	21180.4	39381.8	37081.8	13705.8	18855	19006	27397.1	25310.2	12199.6	22804.3	23821.4	18679	19642.6
met_8033	542.18	4.38	28.352	221.62	Unknown	Unknown	136689	155509	140098	78654.1	89297.1	97656.1	6341.99	10453.6	115293	3417.81	9365.03	12022.1	200928	174561	166492	102079	100445	97240.8	7538.67	10239.5	16545.2	11482.1	3686.23	7623.08	172799	201159	171479	79863.6	103446	106961	145414	8813.79	144376	12833.6	145810	154750
met_2885	290.996	4.393	19.316	153.44	Unknown	Unknown	23634.9	38123.4	19599.8	17791.7	20712.9	10284.1	13726.5	29737.1	20843.4	21672.1	32396.9	8946.63	12158.4	12090.3	15711.8	31346.7	20027.1	47908.9	12180.4	14555	26129.6	12082.5	15363.4	18443	16125.4	22631.4	11432.9	17134.8	22112.3	23521.8	20905.1	18292.7	32423.2	21215.7	15833.5	20205.7
met_2361	229.972	4.426	19.256	154.73	Unknown	Unknown	19289	14034	13626.6	36105.1	26879.6	16478.1	23202.4	21401.4	17665.7	17524.2	17904.2	13164.6	36094.3	18785.6	19266.9	14007.6	19491.4	25011.5	19379.4	15619.1	20898.2	17393.7	12633.3	31347.1	28430.9	24116.7	31512	48060.7	34874.4	15907	25323.6	19389.3	13692.2	20459.7	17887.2	18135
met_1102	469.182	4.427	25.828	202.46	Unknown	Unknown	30948.4	29288.6	30052.5	32490.5	32771.7	29617.9	36227	32890.4	43907.2	39218.9	41042.9	39247.5	69486.6	65907.2	64112.6	72442.6	57746	44212.3	66147.1	69782.4	64761.9	67590.3	55571.9	81283.6	34693.1	33056.3	31020.3	28294.8	36116.4	38758.2	41803.7	35644.5	48502.7	35300.9	40301.8	41167.4
met_166	355.242	4.427	23.476	185.47	Unknown	Unknown	319145	305045	301920	286326	272235	272687	299757	300090	310060	277351	321196	344629	581764	544484	544358	635083	423615	485381	575964	550542	581306	586717	416439	586576	293903	302953	294000	256963	306952	321188	269658	275788	346008	281231	289468	298211
met_191	319.221	4.427	23.394	185.58	Unknown	Unknown	246069	242251	242140	213954	232861	220645	236597	246228	251717	230009	253306	262478	476060	453076	462327	538728	370276	383482	473659	433264	481512	469183	345529	481446	237917	234770	237520	215324	247104	255213	241580	209951	276292	234292	219203	262735
met_1922	499.241	4.427	27.248	213.34	Unknown	Unknown	16777.2	20069.3	15909.3	17432	15941.2	14147	16348.4	20075.3	20297.1	19612	18219.2	19074.5	31179.5	33616.7	33014.3	40647.9	27307.9	27281.7	38814.4	33037.9	34182.2	34215.8	24383.2	33002.9	20524	18459	17533	17501.1	17825.2	20358.3	17048.3	14498.6	21782.4	18790	18534.3	17310.6
met_197	337.231	4.427	23.363	184.94	Unknown	Unknown	250594	218450	225473	221714	217908	219503	245168	242058	253719	230450	235856	267723	472556	425904	490016	514986	326896	392433	456990	448757	433221	414839	320843	451476	232587	225784	243310	193377	249348	237711	224975	204481	270947	242560	213752	229793
met_306	528.195	4.427	27.324	213.63	Unknown	Unknown	147030	139111	129631	135930	121772	136434	147483	165400	147232	146608	160900	149157	257616	240871	289437	335055	207976	255482	290427	265385	313950	277508	198845	274498	146178	133452	150236	141108	147990	138609	146712	129047	165123	152885	121844	163859
met_875	437.245	4.427	25.314	198.79	Unknown	Unknown	45313.5	43669	52309.5	37095.4	46925.8	40354.4	53974.7	48665.4	52040.3	38718.3	51857.8	57620.1	96797.5	77009.5	87357.7	103476	68120.5	68783.4	96803.8	86948.1	77850.3	85070.7	71579.4	94093.5	43286.8	48021.7	41073.1	38321.3	46354.2	53580.4	46589.4	39300	51005.1	40031	45175.9	41320.6
met_2667	453.217	4.428	25.193	197.62	Unknown	Unknown	11788.5	13480.4	10181.9	10786.8	12961.1	6670.91	14000.5	10989.7	16595.4	7968.73	16587	17059.3	25065.3	25003.8	24551.9	28230	14772.2	15742	20056.6	19119.9	20163.1	25052.1	16033	25429.6	17349.7	12502.7	12161	7656.94	10643.6	17653.1	12671.8	12603.6	14172.8	11718.4	11451.7	8392.65
met_5304	550.176	4.428	29.105	227.46	Unknown	Unknown	11670.4	5772.79	6239.24	5986.46	8290.4	2515.64	7505.52	7675.91	5451.69	6462.24	6676.18	8133.6	14975.1	10319.6	11473	16760.4	10004.4	9040.38	7553.61	12706.7	13295.5	13557.8	12161.7	13091.3	7592.76	3899.15	9791.36	9753.5	8684.71	9071.82	6096.77	5465.24	6402.95	6468.65	8484.44	640.498
met_5656	642.135	4.428	30.355	236.51	Unknown	Unknown	6106.95	6821.7	8917.54	6173.17	5918.64	5555.34	6929.48	7022.07	7037.77	7863.16	9303.21	7547.96	13163.4	8033.25	8785.96	14713.3	9917.06	10178.4	6695.17	12386.3	14880.7	14840.3	6652.66	12531.4	7355.47	4847.58	5190.11	3173.89	5462.66	6064.64	6343.06	8100.34	10612.5	3250.54	5799.26	8745.86
met_1932	275.231	4.429	23.284	185.89	Unknown	Unknown	23429.2	16845	21065.2	5568.88	16339.6	21471.1	19288.5	15683.4	16363.2	6304.88	11381.2	11783.7	25529.3	39810.4	38292	31264	38657.4	45182	43303.5	47679.4	56670	42579	10334.2	20370.4	19881.7	11292.2	22804.8	22218.8	22585.3	7762.76	13102.2	16365.2	17957.1	12146	17801.4	13073.3
met_2510	564.162	4.429	27.899	217.83	Unknown	Unknown	19240	17829	11735.5	15035	11921.1	10098.7	8725.63	12904.7	12019.7	16088.8	16346.5	19831.9	26358.2	26824.3	29283.5	32802.4	17909.6	22626	26906.4	33516.3	30509.2	25548.3	22583.7	30377.6	15675	5939.37	15095	9818.35	15761.7	18024.3	2781.47	5587.85	20081.8	18046.5	14947.5	16663.2
met_1520	468.174	4.43	27.415	215.04	Unknown	Unknown	32682.2	24662.7	21247.9	9560.18	22408.5	27034.5	23709.9	27190.4	25022.1	23796.6	26813.3	27859.5	45212.8	44040.1	52428	3598.75	32221.1	41107.8	57906.6	47126.9	56708.5	44081.2	34411.6	47910.2	21774	19779.6	26179.9	11726.5	23824.5	24368.6	27656.7	23259.5	29729.1	28147.3	20218	30634.8
met_5472	355.242	4.43	24.367	192.6	Unknown	Unknown	2700.43	5260.54	6941.47	9102.73	6187.78	8044.96	2236.04	11988.7	4512.56	7565.86	6286.53	8527.31	7102.77	8109.53	11290.3	9314.44	7774.81	9945.14	13940.6	15250.5	7395.5	16268	8312.24	13847.1	3053.28	598.091	5836.66	10036.4	7919.22	6765.96	4880.77	7882.07	13486.4	6912	6277.71	9483.73
met_6316	465.156	4.462	25.809	202.36	Unknown	Unknown	136689	155509	140098	78654.1	89297.1	97656.1	110198	8851.48	8253.57	8459.42	13902.3	10293.1	200928	174561	166492	102079	100445	97240.8	141025	6260.58	4924.81	8883.02	112104	4497.12	172799	201159	171479	79863.6	103446	106961	17542	23495	21172.7	11190.9	21046	16660.7
met_1222	333.206	4.464	23.343	184.85	5Z,8Z,11Z,14Z-Eicosatetraenedioic acid, [M-H]1-; 18S-Resolvin E3, [M-H]1-; 11,18-di-HEPE, [M-H]1-; 12,18-di-HEPE, [M-H]1-; 8,18-di-HEPE, [M-H]1-; Resolvin E2, [M-H]1-; 18R-HpEPE, [M-H]1-; 15S-HpEPE, [M-H]1-; 12S-HpEPE, [M-H]1-; 5S-HpEPE, [M-H]1-; 5,6-Ep-15S-HETE, [M-H]1-; ent-15-J2-IsoP, [M-H]1-; 15-epi-15-A2t-IsoP, [M-H]1-; ent-8-J2-IsoP, [M-H]1-; ent-12-J2-IsoP, [M-H]1-; ent-5-J2-IsoP, [M-H]1-;…	LT-like, [M-H]1-; PG-like, [M-H]1-	26229.4	24232.8	23014.6	21419.2	23167.7	56181.9	51382.8	82471.4	71051.1	69776	82487.4	86253.6	89488.6	39711.8	57291.4	23862.4	55136.9	40710.9	42617	38078.2	46377.1	64667	30803.5	54122.1	48540.3	52590.5	54680.6	17660.5	37647.9	22632.2	120465	130718	113095	105489	129731	114556
met_2471	295.965	4.503	20.907	166.14	Unknown	Unknown	7205.1	19677	5317.67	20280	18895.2	18010.1	25560.8	20395.6	26168.5	15471.7	25318	27683.3	16736.5	19585.1	12439	15907.9	19184.5	23157.2	8552.07	19927.1	8393.84	8391.25	20254.7	32851.1	14554.9	20048.2	14170.2	19908.3	19206.9	31074.6	11374.9	26770.5	17903.3	18215.3	22685.1	32832.7
met_531	412.012	4.565	23.192	182.28	Unknown	Unknown	87433	56525.7	46223.8	8037.95	46766.9	73550	32515.2	69806.2	40421.2	21769.3	45952.7	52388.9	94140	46997.4	79461.6	63366.1	43183.8	87869.7	39027.7	55171.1	46646.9	72788.3	28341.5	38036.9	80110.2	68616.2	61386.6	26682	54207.9	68320.4	30400	32270.4	20280.9	150016	35505.5	42674.5
met_2331	553.873	4.59	26.077	203.54	Unknown	Unknown	23344.8	20409.6	34821.4	62707.2	24532.3	16696	21116.3	24310.5	18241.5	35413.8	36958.8	13489.8	20491.3	20977.8	17069.5	44649.7	32654.3	17439.4	23403.9	17274	23860	28501.9	23081.7	43882.4	20409	38765	25834.9	15801.4	21511.7	18260.6	25509.6	13601.5	21524.3	39904.5	14396.7	53324
met_3763	424.935	4.598	23.012	180.67	Unknown	Unknown	12348	10951.4	16933	11089.5	19520.2	13258.1	14565.8	11830.4	15560.8	17728.7	15821.6	21972.5	16005.1	13750	13590.5	19014.3	15381.1	13248.2	20516.4	14030.7	12616.3	16085.9	14243	10754.2	24487.4	12637.8	12087.9	12187.9	26709.5	15506.3	16694.2	16803.7	9344.06	18270	16446.1	16315.4
met_101	283.042	4.606	19.643	156.28	Unknown	Unknown	1909044	1748150	1157224	78654.1	89297.1	97656.1	110198	117850	115293	122429	114960	114850	4635474	1133297	1639841	102079	100445	97240.8	141025	142363	142498	143568	112104	140749	2865782	2979043	4969384	79863.6	103446	106961	145414	156024	144376	157032	145810	154750
met_4449	463.876	4.611	25.25	197.92	Unknown	Unknown	10078.3	15958.8	14327.9	12497.9	9866.78	11032.3	11586.2	9010.04	14764.6	8550.1	20858.3	9022.36	10069.4	11757	9930.09	13832.8	7332.84	7042.52	13145	11284.5	14282.9	16571.7	11603.9	10288.7	7286.29	11393	10214.3	11442.6	15109.5	13276.7	13316.5	25690.4	9189	10463.6	15540.2	13473.4
met_1182	482.159	4.625	26.637	208.7	Unknown	Unknown	66189.9	55906.6	55099.9	43613	24946.4	36247.8	24741.7	62773.1	46440.8	78446.5	59626.6	63868.2	80755.2	62854.7	78381.5	51473.1	38452.1	46658.3	102806	59199.1	90892.4	103362	63796.1	90445.2	74353.8	57030.7	69165.5	47351.4	42949.3	42820.2	125550	130177	126240	155628	9137.48	134659
met_955	369.227	4.634	24.875	196.37	10,11-dihydro-20-dihydroxy-LTB4, [M-H]1-; 19R-hydroxy-PGE1, [M-H]1-; 19R-hydroxy-PGF2alpha, [M-H]1-; 20-hydroxy-PGF2alpha, [M-H]1-; TXB2, [M-H]1-	PG-like, [M-H]1-	52029	53496.9	52912.2	49195.2	30313.1	59494	62138.2	93497.1	73739.2	69271.3	95747.8	99684.2	83194.2	63133.5	85701.9	44355.3	47491.5	61179.3	120051	113000	116862	145608	90348.1	127384	73730.2	77607.1	68017.8	56295.7	107866	54529.5	164762	12828	182576	147725	9792.57	188042
met_8523	273.04	4.635	19.899	158.6	Unknown	Unknown	20905.1	155509	13530.9	78654.1	89297.1	97656.1	110198	117850	115293	122429	114960	114850	10862.5	7408.4	12177.2	102079	100445	97240.8	141025	142363	142498	143568	112104	140749	11741	13585.4	171479	79863.6	103446	106961	145414	156024	144376	157032	145810	154750
met_990	369.227	4.64	24.015	189.51	10,11-dihydro-20-dihydroxy-LTB4, [M-H]1-; 19R-hydroxy-PGE1, [M-H]1-; 19R-hydroxy-PGF2alpha, [M-H]1-; 20-hydroxy-PGF2alpha, [M-H]1-; TXB2, [M-H]1-	PG-like, [M-H]1-	39032.6	45293.6	37383.5	21172.8	8042.11	10183.8	55563.3	77955.2	64069	68932.9	93668.4	67422.5	97318	71935.4	63139.9	13498	13364.3	14652.7	132134	110048	123676	136225	77507.8	129096	78337	83273.9	77065.6	13010.3	16904.4	24379.5	145516	194513	182262	23268.7	5573.29	169415
met_2189	290.996	4.647	19.316	153.44	Unknown	Unknown	20918.9	13206	30106.5	25020.3	20366	53155.1	26410.2	49532.9	40210	22980.1	30513.3	34385	26610.8	25154.7	32781.1	34337.3	22058.2	16507.8	17207.9	33979.2	25189.3	58112.1	27231.7	26408	26168.4	19573.3	21141.2	17897.2	49381.3	23141.7	15491.4	22979.9	19448.2	29347.9	9270.28	18203.7
met_3920	229.972	4.675	19.267	154.82	Unknown	Unknown	22934.9	14818.3	17895.7	15912	12727.9	15553	12498.9	13650.6	13193.1	26242.9	14529	15066.5	13258.2	5744.18	13347.8	20874.3	14596.8	20797.1	13362	20639.3	26301.2	18316.6	11261.3	16681.2	16951.3	15701.5	16322.6	16619.8	18696.3	25858.6	18823.5	14946	21618.7	16216.6	10301.1	20460.3
met_5331	412.011	4.717	23.198	182.32	Unknown	Unknown	14600.7	11648.3	8067.68	14547.7	7653.85	2970.02	8159.66	8867.46	12256.2	8437.56	7559.05	4118.38	13125.7	6882.21	8267.73	9853.63	8927.35	8824.34	9469.74	7789.79	10060.2	13563	8987.23	7555.39	13972.4	8772.43	7003.56	13730.4	10370	5894.99	7854.94	8932.01	13548.9	10327.5	5390.9	12222.2
met_3367	381.874	4.752	22.332	175.89	Unknown	Unknown	15620.8	25561.5	22723.9	18769.1	15359.2	19372.5	24278.3	16049.6	15877.4	13488.7	16510.2	17004.1	14378.3	22532.3	18276.6	11776.1	22715.3	21313.3	13135.2	17025.6	14000.6	15119.9	20262.2	23771.8	20484.6	23480.3	15759	22124.3	17492	14921.5	25354.5	20260.8	17561.3	13439.5	43845.2	8516.32
met_4776	306.003	4.812	19.976	158.42	Unknown	Unknown	11563.7	9925.51	11611.9	11492.5	13783.4	12346.6	11580.9	12255.2	11592.5	13464.8	13825.8	15625.5	7973.26	10627.2	16350.2	17661.9	17346.3	8080.74	10529.8	14787	10680	9295.19	13371.1	14727.5	8068.04	12900.7	12553.5	12206.8	11432	12082.6	13487	3740.41	11616.7	16816.7	16374.8	20498.8
met_3016	290.996	4.847	19.309	153.39	Unknown	Unknown	23617	35425.7	33672.1	8915.28	26195.7	26865.3	13199.5	18442.2	18571.5	20683.9	16901.3	16853.8	25431.1	31479.6	24373	39871.4	15873.5	40495	20300.9	18249.3	11217.4	17387.2	16805.2	22488.9	25910	32296.4	23696.3	24385.2	25799.8	45434.1	24933.7	11716.4	28117.7	21414.3	18154.3	16845.4
met_6221	333.206	4.865	23.288	184.42	5Z,8Z,11Z,14Z-Eicosatetraenedioic acid, [M-H]1-; 18S-Resolvin E3, [M-H]1-; 11,18-di-HEPE, [M-H]1-; 12,18-di-HEPE, [M-H]1-; 8,18-di-HEPE, [M-H]1-; Resolvin E2, [M-H]1-; 18R-HpEPE, [M-H]1-; 15S-HpEPE, [M-H]1-; 12S-HpEPE, [M-H]1-; 5S-HpEPE, [M-H]1-; 5,6-Ep-15S-HETE, [M-H]1-; ent-15-J2-IsoP, [M-H]1-; 15-epi-15-A2t-IsoP, [M-H]1-; ent-8-J2-IsoP, [M-H]1-; ent-12-J2-IsoP, [M-H]1-; ent-5-J2-IsoP, [M-H]1-;…	LT-like, [M-H]1-; PG-like, [M-H]1-	136689	155509	140098	78654.1	89297.1	97656.1	3731	2078.04	9544.33	8362.09	8160.7	12940.4	200928	174561	166492	102079	100445	97240.8	10523.7	142363	5439.3	8653.89	5280.62	7666.95	172799	201159	171479	79863.6	103446	106961	19656.7	18727.5	20679.1	5360.84	19130.7	21430.3
met_4103	295.965	4.929	20.918	166.23	Unknown	Unknown	12691.5	9756	13334.4	10195	18172.6	17926.9	6585.4	12625.7	12564.8	25497	11561.1	14303.6	17332.7	20817.5	12814.2	16362.4	19751.4	13108.8	17020.4	16094.6	15817.8	15422.1	6909.75	14178.7	16061.8	10148.7	14348.6	11683.8	16474	13085.7	13663.5	18391.9	10003.8	12317.6	14502.1	12984.4
met_5767	486.117	4.975	25.58	200.31	Unknown	Unknown	8247.64	7662.64	6703.75	4054.54	6140.09	7493.61	8165.61	8134.74	7417.15	10039.6	4929.49	2673.36	8496.79	6132.51	4088.77	9560.98	6611.85	10529.8	6637.62	4333.2	5198.58	6025.33	6693.14	7117.04	9590.9	7613.74	12379.2	18044	10870.5	15928	9432.17	14706.5	7825.54	14027.7	4376.79	13213.9
met_3098	290.996	5.158	19.315	153.44	Unknown	Unknown	24093.7	28106.4	29716.8	12950.4	21661.5	25589	19412.4	25113	23614.7	20501.8	26471.5	14686.5	9771.23	13758.3	31689.3	15359.8	9334.62	53173.9	31609.2	28606.3	20281.5	18115.3	16350.1	20383.1	15481.9	23088.2	16036	14423.3	17352.9	47907.6	21186.9	9935.93	15494	19022.2	21573.5	10301.2
met_5514	412.011	5.171	23.191	182.27	Unknown	Unknown	10529.5	9967.99	7249.53	7625.09	15471.7	16968.7	8236.44	10445.4	8549.25	11391.2	8411.56	10483.9	11421.7	10032.9	13920	9432.45	7854.07	6684.16	8263.46	10920.1	10656.5	16179.8	14492.9	2388.33	13771.1	12033.3	10460.4	11506.7	6521.97	5035.65	13540.5	2154.3	5068.96	10413.6	8668.96	11050.2
met_3892	662.922	5.236	27.784	216.11	Unknown	Unknown	13251	10869.9	12491.9	10789	15165.2	13941.8	7636.4	11085.3	13202.5	4787.2	12906.1	38165.3	28440.2	42001.4	13081.5	21048.3	12764.9	15175.4	18235	8939.52	13744.5	11797.4	12558.4	9745	14469.2	11437.6	18727.3	19852.6	10063.4	24494.5	16254.2	13209.1	14945.5	14214.2	15159.5	14252.7
met_4070	201.149	5.288	19.558	158.41	10-hydroxy-undecanoic acid, [M-H]1-; 2-hydroxy hendecanoic acid, [M-H]1-; 3-Hydroxynonyl acetate, [M-H]1-; 3-hydroxy-undecanoic acid, [M-H]1-; 4-hydroxy-undecanoic acid, [M-H]1-; omega-hydroxy hendecanoic acid, [M-H]1-	Unknown	8366.75	6682.77	5472.01	6871.59	6427.1	3551.62	9944.79	5607.9	6879.85	8389.45	5516.58	8378.66	8666.22	8309.31	6840.43	27995.1	2113.92	4476.82	18689.3	7599.14	4749.16	21593.2	6179.81	9262.15	11909.9	7504.36	5311.47	17772.9	14062.6	14655.1	14281	10174.9	9969.44	13506.7	16025.7	10499.5
met_2280	229.972	5.301	19.268	154.83	Unknown	Unknown	15911	18539	15212.4	32570.3	19730.7	66794.8	22198.8	40208.8	23635.1	22059.9	22827.1	21240.9	22500.4	15019.1	20611.1	20311	15620.1	23244.5	28041.6	34138.7	30786.7	27620.3	16997.6	33244.2	22631.7	22074.5	25338.2	17248.3	18244.1	20732.5	21633.7	22209.4	23100.5	31690	20950.1	15918.8
met_2570	295.965	5.503	20.918	166.21	Unknown	Unknown	27041.6	11880.6	20244.5	24474.7	24201.7	23662.8	5748.82	19321.4	12755.5	17785.9	17952.6	9271.04	24385.5	28820.8	22923	20151.7	16140.2	19417.2	21705.1	21265.9	17516.1	17335	26104.6	20133.6	26960.5	25622.1	20224.1	19432.9	24200.7	20421	21315.9	14954.4	15992.3	21114.3	31618.2	21402.6
met_5854	306.003	5.551	19.966	158.34	Unknown	Unknown	136689	155509	15079.7	78654.1	15030.9	97656.1	110198	117850	115293	5493.91	12878.5	13777.3	200928	7190.2	166492	102079	100445	97240.8	141025	10248.5	12678.4	143568	13457.3	12789.3	13836.2	201159	10874	11802.2	14128.4	106961	6101.02	15914.9	144376	157032	11243.3	4435.44
met_5291	295.965	5.571	19.538	155.11	Unknown	Unknown	9721.3	6884.73	5760.28	10731.9	9180.75	7831.44	9005.68	8544.38	18589.7	13909.1	8894.85	13694.3	10899.1	11377.3	7434.87	5652.92	8586.35	5443.91	9816.72	7318.47	14189.5	10604.9	10217.3	4937.84	10458.9	10866.7	10345	10640.4	11547.7	9696.09	11198.8	9032.6	5065.37	23284.3	13373.3	11063.6
met_8371	317.068	5.611	21.482	170.28	Unknown	Unknown	136689	155509	140098	10366.1	89297.1	97656.1	2839.89	117850	115293	7734.82	114960	114850	200928	174561	166492	14167.3	6887.38	5743.25	141025	142363	8875.16	143568	112104	140749	172799	201159	171479	11535.9	12492.3	15306.1	145414	3412.11	8243.04	157032	7895.31	154750
met_2115	376.081	5.614	23.125	182.3	Unknown	Unknown	20190.3	18421.2	20495.5	47193.9	30969.2	24348.5	9936.65	19514.7	16240.1	28806.2	13055.4	9668.58	25312.3	20379.9	18857	72318.3	21286.9	59701.3	12924.5	19768.8	32118.7	21074.2	3572.33	6149.87	29819.2	27532.2	32352.9	70132.2	57567.9	63217.5	26739.3	20115.7	24510.5	33842.8	32713	35486.6
met_1434	213.149	5.631	19.605	158.25	3R-hydroxy-5Z-dodecenoic acid, [M-H]1-; 10-hydroxy-11-dodecenoic acid, [M-H]1-; 12-hydroxy-10-dodecenoic acid, [M-H]1-; 12-hydroxy-3Z-dodecenoic acid, [M-H]1-; 6-hydroxy-4-dodecanolide, [M-H]1-; 11-oxo-dodecanoic acid, [M-H]1-; 9-keto lauric acid, [M-H]1-; 7-Oxododecanoic acid, [M-H]1-; 5-Oxododecanoic acid, [M-H]1-; 4-keto lauric acid, [M-H]1-; 3-oxo-dodecanoic acid, [M-H]1-; 2-oxo-dodecanoic ac…	Unknown	27853.5	10407.3	14654.2	11894.9	15403	21417.5	14506.2	9473.86	8507.33	9035.45	7349.14	12656.4	69355.6	58605.7	64147.4	28293.9	16140.1	25164	56607.1	63035.7	61542.9	66225.9	51876.5	71739.9	46629.4	52732.8	49956.3	17492.9	22129.3	21642.4	37766.2	44526.2	37824.1	31307.4	49254.8	40066.7
met_1264	251.095	5.673	19.311	154.47	Unknown	Unknown	14120	12895.2	12088.4	8609.01	8786.4	35575.4	9990.71	22949.3	20206	33268.5	12005.9	11274.5	42469.3	29348.8	22877.9	77016.2	32808.2	41911.6	50430.4	15401	24936.7	29896.1	38887.1	53742.4	35052.4	24387.5	25223.2	72940.1	44108.6	35711	25244.2	35213.6	33987.7	30628.7	13153.6	15446.6
met_8895	464.148	5.702	25.583	200.58	Unknown	Unknown	136689	155509	140098	78654.1	89297.1	97656.1	2419.14	3485.19	115293	4155.05	6527.47	6793.44	200928	174561	166492	102079	100445	97240.8	141025	2666.88	4370.54	143568	112104	5539.26	172799	201159	171479	79863.6	103446	106961	14723.4	11024	12795.8	7427.22	9107.43	10194
met_2393	229.972	5.808	19.256	154.73	Unknown	Unknown	11488	16616.2	9917.72	19022.6	23012.2	29867.5	19872.6	11709.1	27180.4	20832.9	22495.2	33960.7	33609	17000.7	22586	21160.6	23277.3	20591.7	34754.8	31007.1	23871.5	22848.1	22093.7	25520.6	34857.9	24957	10678.1	19478.8	17050.4	24769.4	25761.3	25078.8	18690.5	16204.3	20391.6	18131.1
met_6318	412.011	5.81	23.185	182.24	Unknown	Unknown	7667.32	10240.8	6188.94	5468.69	8440.12	7489.56	9508.76	9976.09	8912.02	10091.5	6505.97	6700.54	14271.6	6948.98	8759.51	5184.07	6354.25	6989.85	7188.34	10389.7	9073.21	6391.45	10174.9	9769.05	14285.3	8893.46	7036.79	7046.67	6804.61	6450.58	8312.46	7705.13	8175.19	9052.31	7544.83	11500
met_4863	353.232	5.837	23.403	184.93	Troxilin B3, [M-H]1-; Trioxilin A3, [M-H]1-; 11,14,15-trihydroxy-5Z,8Z,12E-eicosatrienoic acid, [M-H]1-; 11,12,15-TriHETRE, [M-H]1-; 11,12,15S-trihydroxy-5Z,8Z,13E-eicosatrienoic acid, [M-H]1-; 13,14-Dihydro- lipoxin A4, [M-H]1-; (5Z,9E,12S,14Z)-8,11,12-trihydroxyicosa-5,9,14-trienoic acid, [M-H]1-; 8-iso-13,14-dihydro-15-keto-PGF2alpha, [M-H]1-; 8-iso-PGE1, [M-H]1-; 15-F2t-IsoP, [M-H]1-; ent-8-F…	PG-like, [M-H]1-	136689	155509	140098	78654.1	89297.1	97656.1	9796.85	8413.86	8913.03	6886.79	9522.07	9323.33	200928	174561	166492	102079	100445	97240.8	12119.8	14332.7	14481.8	13761.4	12051.6	12518.4	172799	201159	171479	79863.6	103446	106961	25075.5	29283.8	23148.4	16855.4	24906.3	20327.7
met_6230	287.185	5.889	21.666	172.48	Unknown	Unknown	7119.33	4338.28	7020.31	6178.33	5018.79	8145.75	10740.3	5974.76	10995.5	7107.66	7678.04	13147.5	5979.65	6707.6	4353.44	14555	6515.27	5766.19	7529.71	6697.99	7158.37	7616.7	6102.32	4629.92	10531.6	7104.57	5356.21	1951.92	10211.2	2393.19	6987.89	12393.1	8016.07	7932.98	9729.94	7017.64
met_3857	297.055	5.903	20.539	163.15	Unknown	Unknown	17739.8	15556.9	15027.9	13600	15857	13884.7	13103	12418.1	13247.1	11923.8	16603.6	17831.4	7842.19	9777.2	10140.3	4130.95	9199.51	10833.1	9189.73	16382.1	7392.51	14610.8	11790.1	13632.4	12398.9	13993.3	14370.1	10654	10280.1	14112.8	7451.95	13258.3	13013.5	7337.53	13470.9	12100.4
met_5184	306.003	5.91	19.969	158.39	Unknown	Unknown	9319.24	16132.3	8693.51	13533.6	11066.9	15973.6	10080.4	12389	9851.19	8420.21	12311.8	12543.1	11473.2	9746.87	12728.1	11379.8	7078.05	10167.7	11151.4	9536.01	6470.04	10516.7	7283.94	18712.3	11368.9	9027.64	13852.2	6861.67	17196.2	9641.2	13059.2	12058.5	11128.2	10653.2	8119.66	10028.1
met_937	353.232	6.014	22.902	180.92	Troxilin B3, [M-H]1-; Trioxilin A3, [M-H]1-; 11,14,15-trihydroxy-5Z,8Z,12E-eicosatrienoic acid, [M-H]1-; 11,12,15-TriHETRE, [M-H]1-; 11,12,15S-trihydroxy-5Z,8Z,13E-eicosatrienoic acid, [M-H]1-; 13,14-Dihydro- lipoxin A4, [M-H]1-; (5Z,9E,12S,14Z)-8,11,12-trihydroxyicosa-5,9,14-trienoic acid, [M-H]1-; 8-iso-13,14-dihydro-15-keto-PGF2alpha, [M-H]1-; 8-iso-PGE1, [M-H]1-; 15-F2t-IsoP, [M-H]1-; ent-8-F…	Unknown	49297.9	51735.3	44947.6	35626.4	29864.4	33613.5	37511.5	37805.2	35598.2	40554.3	44807.9	55676.8	75465.5	75715.8	71343.8	37361.2	33277	36492.7	74445.4	63543.6	66711.8	71746.6	37070.4	64760.9	93813.2	103313	100599	42971.5	44997.8	53099.5	99400.8	107473	91742.4	86300.2	106007	104014
met_2255	290.996	6.041	19.329	153.55	Unknown	Unknown	21968.4	16382.5	18297.7	18316.7	17632.5	17234.6	29655.1	24016.5	24614.8	16629.2	21571.8	26626.3	34052	14797.1	35516	53221	26834.5	29154.5	17489.4	9205.5	12193.3	58802.2	57270.1	9958.6	19854.3	25067.7	32017.4	15971.3	20712.4	17651.6	17075.3	20757.1	14998.8	18144.8	18911.5	15178.4
met_959	353.232	6.207	23.113	182.62	Troxilin B3, [M-H]1-; Trioxilin A3, [M-H]1-; 11,14,15-trihydroxy-5Z,8Z,12E-eicosatrienoic acid, [M-H]1-; 11,12,15-TriHETRE, [M-H]1-; 11,12,15S-trihydroxy-5Z,8Z,13E-eicosatrienoic acid, [M-H]1-; 13,14-Dihydro- lipoxin A4, [M-H]1-; (5Z,9E,12S,14Z)-8,11,12-trihydroxyicosa-5,9,14-trienoic acid, [M-H]1-; 8-iso-13,14-dihydro-15-keto-PGF2alpha, [M-H]1-; 8-iso-PGE1, [M-H]1-; 15-F2t-IsoP, [M-H]1-; ent-8-F…	PG-like, [M-H]1-	61283.4	56444.6	59790	58854.9	61358.1	49413.9	33421.3	30721	33397	34375	47403.4	40655.5	90342.6	85763.8	75214.3	79333.5	49663.9	56971.3	59577	55742.1	46822.4	60250.5	35670.4	52423.8	80392.7	96412.8	91238.7	67563.8	70541.9	65929.6	82317.6	77961.6	83554	76249.3	91026.8	75292
met_1364	243.16	6.348	19.347	155.02	6-methyl-dodecanedioic acid, [M-H]1-; 4-methyl-dodecanedioic acid, [M-H]1-; 3-methyl-dodecanedioic acid, [M-H]1-; 2-methyl-dodecanedioic acid, [M-H]1-; Tridecanedioic acid, [M-H]1-	Unknown	35582.9	30944.9	32122.3	34792.1	28856.2	38566.8	27184.7	27171.4	29714.1	40936.8	30692.4	30732	47532.2	27068.3	37385.8	57403.6	33617.6	24566	41290.8	31976.4	30837.2	49275.3	31566.7	45243.3	43902.2	28642.5	25302.9	29388	31638.6	43479.7	31199	25070.5	36393.2	33979.2	27150.5	36908.1
met_735	558.118	6.35	30.269	236.57	Unknown	Unknown	71207.7	65542.8	59345.1	62813.3	61926.8	71166.8	68875	71359.2	64105.8	65858.2	68904.6	68476.9	56215.3	47469.5	65531.7	76031.7	61213.1	67501	66036	54755.3	70497.5	69722.9	49030.4	65093.4	79140.7	92275.1	87745.9	94463.3	102900	87561	85761.7	95740	84007.3	85611.4	81697.1	91992.6
met_2481	239.087	6.382	19.254	154.4	Unknown	Unknown	24257.6	21515.4	21838.3	24855.5	25197	33168.5	20769	36337.4	24813.9	39496.6	29396.2	23102.9	30237.3	21216.1	22942.8	37588.3	2603.96	50243.3	29032.9	26707	40140.9	43082.3	26328.8	30700.2	27631	27001	24726.7	26414.5	18981.6	19354.8	34656.9	18735.8	23586.7	29658.8	25193.7	29579.4
met_3450	353.232	6.403	23.425	185.11	Troxilin B3, [M-H]1-; Trioxilin A3, [M-H]1-; 11,14,15-trihydroxy-5Z,8Z,12E-eicosatrienoic acid, [M-H]1-; 11,12,15-TriHETRE, [M-H]1-; 11,12,15S-trihydroxy-5Z,8Z,13E-eicosatrienoic acid, [M-H]1-; 13,14-Dihydro- lipoxin A4, [M-H]1-; (5Z,9E,12S,14Z)-8,11,12-trihydroxyicosa-5,9,14-trienoic acid, [M-H]1-; 8-iso-13,14-dihydro-15-keto-PGF2alpha, [M-H]1-; 8-iso-PGE1, [M-H]1-; 15-F2t-IsoP, [M-H]1-; ent-8-F…	PG-like, [M-H]1-	21995.8	20610.1	21409.9	15439.7	24400.9	17918.7	12016.2	14153.3	7694.51	10036.7	11690	13762.7	26230.5	19710.6	27014.7	19111	18434.2	19032	13075.5	15794.2	9921.83	18292.7	18701.6	16572	25056.7	28092.6	30792.5	18608.9	15665.6	24213.1	12120.4	11357.8	10980	18446.8	19540.5	7640.76
met_2613	229.971	6.485	19.257	154.74	Unknown	Unknown	23266.5	29152.5	22969.8	7616.02	36594.3	20190.6	17673.9	14839.8	16561.8	18220.4	14356.5	15992.8	19432.9	18841.9	20798.2	13900.2	10334.3	45512.2	21040.9	18118.6	7886.02	14973.9	21777.2	21197.2	15881.1	19317.1	16831.2	19643.6	17841.1	24470.2	19394.3	21552.9	34285.6	20831.9	17603.1	27483.1
met_5522	295.965	6.695	19.508	154.87	Unknown	Unknown	8243.71	5740.4	6500.96	7700.98	16154	7859.58	9289.18	7091.57	5017.03	5373.79	15153.1	12553.5	4848.14	3953.35	3449.1	10706.1	13472.8	14015.8	5035.74	5669.49	8095.44	9671.85	6905.21	8172.8	9371.57	13442.6	9244.61	9265.76	10469.7	7137.37	8731.83	10683	5000.21	5741.58	6353.23	7829.02
met_3853	309.17	6.702	22.115	175.55	methyl 8-[2-(2-formyl-vinyl)-3-hydroxy-5-oxo-cyclopentyl]-octanoate, [M-H]1-	Unknown	11138.1	5970.66	4632.33	9119.48	7175.06	12822.9	13174.4	5736.7	5764.25	7133.96	7269.18	8976.2	14788	8118.83	8371.56	26343.8	7508.53	14375.6	19295.2	8039.62	8090.8	17969.4	5536.41	20878.6	19788	11956.1	9852.26	12346.3	12493.9	17602.9	7210.43	11569	12176.2	13156.1	11869.1	13880.3
met_3883	229.971	6.743	19.262	154.79	Unknown	Unknown	12159.3	18241.4	11262.5	8203.88	18839.6	9316.19	8847.41	9342.55	11088.4	15423.1	9186.11	10338.7	11861.2	22718.9	11334.1	6741.22	11391.3	17748.4	12122.3	9542.3	17054.1	7411.65	8538.92	7970.95	10402.1	8929.06	13227.7	27472.1	17845.2	11316.6	11096.3	15394.2	7348.16	16074.7	18934.7	11979.7
met_6314	401.159	6.756	27.654	217.96	Unknown	Unknown	2919.66	5587.09	6720.9	5073.11	5730.27	5278.28	7084.93	5511.56	4347.74	1530.81	6633.54	6248.28	3706.39	4804.09	5147.65	2584.52	3184.98	2837.26	3642.2	3585.98	4271.26	3322.47	5083.68	1829.16	8917.42	9054.02	9026.59	10787	10777.6	10472.4	7185.76	7572.09	11687.2	9496.1	11241.3	8669.97
met_4367	461.18	6.757	27.7	217.39	Unknown	Unknown	8390.18	7612.26	10688.6	8369.22	11110.8	10080.9	12805.2	8030.04	8636.81	7356.21	8253.3	9053.9	12644.6	9568.43	7542.61	15000	5168.7	10227.6	15353.8	10771.3	8454.22	13943.4	12371.9	7799.4	13540	8009.03	15790.4	16483.6	15619.6	19816.7	13457.5	17868.3	15728.5	13508.1	18514	13826.2
met_2097	270.207	6.769	20.816	166.1	Unknown	Unknown	28257	22632.4	26542.1	87741.7	42957	42509.7	24159.2	34482.5	33741	37118.6	29967.2	37133.6	12456.8	10240.4	17494.7	9102.37	6407.77	9958.17	14352.6	11613	15924.8	12181.1	9359.46	9429.62	10869.5	7583.94	7811.8	12075.3	22349.8	30159.5	12571.3	7313.37	11525	8102.11	13618.5	15032.6
met_176	293.175	6.79	22.186	176.51	Unknown	Unknown	303988	261211	263765	358088	293173	253968	334253	259668	278254	358568	266303	278941	418918	233246	375545	652615	299160	353464	452182	260743	322899	471183	269837	469594	329815	302036	261143	391037	384084	507559	336899	309605	443992	355104	342361	331544
met_1957	407.115	6.79	24.642	193.89	Unknown	Unknown	20531.9	14441.2	13679	27632.3	17514.5	19460.7	23035.8	14771.2	13990.5	20575.4	17251.6	19021.6	28603.4	13026.9	27513.4	43358.8	22726.5	19259	29835.1	17755.1	20590.9	33020.2	17491.5	26206.2	21628	17042.4	14631.8	27849.4	29773.8	33165.6	14120	21964.8	32607.7	22326.8	20259.3	19711.2
met_4898	502.095	6.79	26.52	207.55	Unknown	Unknown	7799.72	5519.05	6433.45	8562.61	3101.45	6381.11	8355.79	8761.46	7939.88	8999.17	6658.35	5155.46	10737.9	4559.63	13704.1	20906.5	9454.49	10611.3	15005.1	9897.52	10555.5	13653.4	10255.3	14289.6	8325.76	5239.05	7049.56	13666.7	10218.9	9616.25	8776.02	8675.19	14863.9	12240.3	9161.77	14385.8
met_5337	451.163	6.79	27.02	212.13	Unknown	Unknown	6112.78	3456.7	5514.63	8427.41	3574.58	4767.72	7819.54	5235.51	6952.55	6735.54	2614.33	4201.41	8376.1	6053	6555.57	13984.8	4212.22	5744.02	9564.28	6142.55	5168.07	11076.7	3096.69	12875.9	8640.49	6710.79	6037.46	11379.1	9953.17	15976.8	6932.23	7285.83	10215.5	6120.74	7486.47	6234.28
met_578	236.105	6.79	22.113	177.77	Unknown	Unknown	76093.5	68503.6	61396.8	91185.1	72791	72134.1	96219.7	69045.4	74317.9	94047.9	70693.9	70300.2	119680	58379.5	99607	181847	88973.9	98464.6	123761	83459.7	85535.8	140928	70883.6	128961	102387	88817.3	73662.2	115244	105482	151153	90039	86147.9	120974	98159.6	90574.4	95439.6
met_1202	221.154	6.791	22.117	178.44	7E,9E,11-Dodecatrienyl acetate, [M-H]1-; 9Z-Dodecen-7-ynyl acetate, [M-H]1-; R-cucujolide V, [M-H]1-	Unknown	33758.2	34941.6	31332.1	38086	33322.2	29772.1	36108.6	28871.2	24096.3	41694.5	31779.8	32616.2	48926.9	23692.3	48964.1	79619.1	37021.4	44447	57704.5	27517.8	36854.9	58532.4	28869.2	51988.7	39293.4	37164.4	29285.1	45260.8	47453.5	64252.8	39549.7	37579.6	51144.4	37040.9	33261.1	39466.2
met_496	466.129	6.791	26.127	204.86	Unknown	Unknown	108226	79639.3	77105.5	115089	75543.7	84363.4	95416.3	87664.5	80699.8	126614	69674.8	90807.6	125766	72047.2	128972	213944	96415.9	131065	153201	81826.8	118530	148485	70347.9	163115	120119	90058.4	93855	149835	118622	148658	114223	84439.8	125856	128410	96387.2	108948
met_849	375.178	6.791	25.374	200.25	Unknown	Unknown	55300.7	50302.2	44300.5	66510	54455.7	40243.8	64745.1	39256.2	48026.4	61927.3	44513.1	62324.4	76604.7	39418.7	72916	120674	48733	56500.4	84596.3	46589.4	62809.2	77238.8	46971.4	83477.2	59206.6	56315.9	45499.4	70967.9	60109.2	91740.7	59792.2	62454.5	84643.4	59245.4	62748	58074.6
met_3805	442.084	6.793	25.103	197.07	Unknown	Unknown	5465.99	7689.41	9845.16	10753.4	10671.7	13928.3	8239.53	11162	6553.73	16900.4	7947.56	7882.35	10959.9	10597.1	17170.1	18949.2	6967.02	20501.1	20774.2	8716.87	16498.5	13728.8	9394	18997	11338.5	9264.42	8401.82	15988.4	13018.4	15660.5	12459.3	9257.01	11128.8	17251.4	5540.54	15154.8
met_1273	401.301	6.814	26.185	206.26	Unknown	Unknown	55871	25341.7	45243.6	32712.8	27185.5	38321.9	40841.7	30573.4	45127.9	44347.9	37969.9	40779.2	44503	34109	49938.8	25700	24559.4	27461.1	41661.7	30367.5	33422.6	37645.7	27481.3	35435.1	38654.4	35721.1	44029.2	29346.3	34157.1	40177.2	44680.4	50546.9	37535.8	31008.2	43495.1	40068.7
met_6845	239.087	6.814	19.355	155.21	Unknown	Unknown	3579.94	6785.76	5633.26	10671	14182.7	9932.27	9043.95	6317.57	10599.9	7534.46	12190.8	7404.18	3247.66	5278.82	6439.07	8492.71	5473.33	6463.7	6675.31	7013.45	4080.55	11693.1	6335.11	10319.5	6562.82	6304.04	6733.35	4700.27	7052.52	14212.2	10400.1	6059.52	7522.33	4221.82	2809.47	4278.56
met_5093	291.159	7.043	21.25	169.03	Unknown	Unknown	136689	155509	140098	78654.1	89297.1	97656.1	2358.73	117850	719.278	122429	6575.33	114850	200928	174561	166492	102079	100445	97240.8	33194.3	29274.6	33448.9	28493	26758.3	30764.8	172799	201159	171479	79863.6	103446	106961	12760.7	7966.93	13491.8	8680.79	10770.2	11141.2
met_563	353.233	7.06	23.268	183.85	Troxilin B3, [M-H]1-; Trioxilin A3, [M-H]1-; 11,14,15-trihydroxy-5Z,8Z,12E-eicosatrienoic acid, [M-H]1-; 11,12,15-TriHETRE, [M-H]1-; 11,12,15S-trihydroxy-5Z,8Z,13E-eicosatrienoic acid, [M-H]1-; 13,14-Dihydro- lipoxin A4, [M-H]1-; (5Z,9E,12S,14Z)-8,11,12-trihydroxyicosa-5,9,14-trienoic acid, [M-H]1-; 8-iso-13,14-dihydro-15-keto-PGF2alpha, [M-H]1-; 8-iso-PGE1, [M-H]1-; 15-F2t-IsoP, [M-H]1-; ent-8-F…	PG-like, [M-H]1-	93754.6	85498.7	81414.1	81008.6	93385.4	84119.2	66092.9	67997.3	59035.9	64152.8	70531.1	69715.6	212666	180241	207483	163317	140717	139135	195686	181977	181985	199908	132538	176191	130904	150076	155288	136685	135555	138291	121675	145282	116742	106642	141042	135761
met_997	325.201	7.165	22.445	177.84	2,3-Dinor-8-iso-PGF2alpha, [M-H]1-; 2R-HpOTrE, [M-H]1-; 9K,12,13-diHODE, [M-H]1-; 2,3-dinor-PGE1, [M-H]1-; 2,3-dinor-11b-PGF2alpha, [M-H]1-	Unknown	22517.5	35656.8	40724.1	35493.5	42566.6	8732.61	16331.4	34383.5	42627.6	80714.9	11384.4	7981.69	77743.4	13355.4	127428	92151	38489.5	11100.3	34738.9	37747.4	46560.3	144801	12309.6	199720	136898	95910.9	20681.1	39466.2	52934.8	165335	65843.8	15855.2	144776	41224.9	38477.7	86495.7
met_5792	373.99	7.17	21.71	171.03	Unknown	Unknown	9143.63	6741.42	7928.66	7791	10195.6	10603.7	6494.9	9974.07	6863.5	7737.98	5940.98	13696.9	5865.2	7792.35	7555.91	8286.12	7412.57	6259.67	9858.47	9471.18	6199.7	5695.14	10893.7	8432.84	10230	9706.84	8667.89	6115.83	10019.3	6451.59	10493.8	17168.2	13473.4	9663.66	10373.6	13254.9
met_2467	321.167	7.193	22.458	178.03	Unknown	Unknown	8136.24	8916.19	7603.27	1646.44	5835.11	11916.1	4408.5	6368	8359.53	7772.66	4348.87	9372.66	25041.3	19919	20365.8	102079	11874.1	7991.44	20236.2	19476.8	22965.4	21267.8	17991.1	23015.7	43510.5	47967.6	45002.9	4933.97	4719	4525.43	40199.8	39761.2	34226.7	29145.7	44052.8	38498.4
met_5166	353.104	7.194	22.777	179.94	Unknown	Unknown	9793.02	7664.9	7739.09	9475.19	9770.56	12369.9	3029.38	3072.91	7741.14	2817.01	7273.2	9014.91	10235.1	10152.7	7398.95	10552.2	8221.53	9162.95	10918.8	11275.7	5986.8	10838.7	9421.43	8011.59	17873.8	23545.5	18596.2	11679.7	10271.6	9457.38	17411.2	20056	14028.5	13569.4	18386.5	16123
met_1755	412.118	7.195	24.195	190.26	Unknown	Unknown	12560.8	9671.15	13326.3	9673.73	7268.96	9576.35	12939.8	12309	9930.05	11386.4	12696.7	10848.9	31419.9	26178.8	34771.9	17205.3	17557.1	19676	26082.2	27274.1	31576.8	34047	23453.7	28567.1	65721.7	66986.2	69401	8066.41	6895.67	5147.03	50282.6	57866.3	47637.1	50435.6	56419.6	61885.1
met_4144	309.17	7.203	21.736	172.49	methyl 8-[2-(2-formyl-vinyl)-3-hydroxy-5-oxo-cyclopentyl]-octanoate, [M-H]1-	Unknown	16070.5	15954.3	16878.4	16224.6	18243.8	16964.3	14758.2	13340	21118.6	14078.2	18201.5	21218	12707.6	11667.5	14098.4	13706.6	11746.2	9990.36	14340.2	13396.1	12981.1	14074.6	12837.9	5385.93	9175.22	13397.5	11736.6	10626.9	18350	17055.8	9329.09	14341.5	9606.87	9500.74	15422.6	12270.5
met_1758	215.165	7.246	20.259	163.52	11-hydroxy-dodecanoic acid, [M-H]1-; 9-hydroxy-dodecanoic acid, [M-H]1-; 7-hydroxy-dodecanoic acid, [M-H]1-; xi-5-Hydroxydodecanoic acid, [M-H]1-; 4-hydroxy lauric acid, [M-H]1-; beta-hydroxylauric acid, [M-H]1-; alpha-hydroxy lauric acid, [M-H]1-; 12-hydroxy lauric acid, [M-H]1-	Unknown	19454.9	11532.3	12327.4	25336	17296.8	13012.4	28407	15447.4	16870.3	23110.2	12471.5	16774.5	31497.8	16201.9	26871.6	53958.4	19278.9	23035	38123.3	17734.7	23185	41110.8	19445.1	34405.3	27787.2	23595.5	20709.3	31989.4	30259.6	42084.7	28436.6	21730.1	38112.1	26569.8	33169.2	23404.8
met_375	353.232	7.333	23.594	186.46	Troxilin B3, [M-H]1-; Trioxilin A3, [M-H]1-; 11,14,15-trihydroxy-5Z,8Z,12E-eicosatrienoic acid, [M-H]1-; 11,12,15-TriHETRE, [M-H]1-; 11,12,15S-trihydroxy-5Z,8Z,13E-eicosatrienoic acid, [M-H]1-; 13,14-Dihydro- lipoxin A4, [M-H]1-; (5Z,9E,12S,14Z)-8,11,12-trihydroxyicosa-5,9,14-trienoic acid, [M-H]1-; 8-iso-13,14-dihydro-15-keto-PGF2alpha, [M-H]1-; 8-iso-PGE1, [M-H]1-; 15-F2t-IsoP, [M-H]1-; ent-8-F…	PG-like, [M-H]1-	28787.7	27721.1	28323.8	65739.5	31076.7	29746.4	155670	185691	140565	180602	208633	198826	57953.3	61513.5	62722.9	12036.7	13837.3	12128.8	338201	293732	399192	281799	307632	342524	41069.5	42219	41488.7	7249.41	40191.4	7772.11	317048	437940	425471	318371	403818	432264
met_1193	239.165	7.405	20.609	165.41	(1S,2S)-3-oxo-2-pentyl-cyclopentanebutanoic acid, [M-H]1-; 7-oxo-11E-Tetradecenoic acid, [M-H]1-	Unknown	38290.2	43024.6	44330.4	21172.8	12063.1	14088.7	38747.3	41731.2	52238.8	39058.2	49115.1	50136.3	90494.6	71507.4	61243.9	15215.6	12316.7	15565.1	54625.3	56434.8	49874.5	68212.6	50530.2	62931.6	96726.4	104260	98367	1804.38	20761.7	1848.19	134644	155226	133870	124898	161834	149867
met_1995	239.165	7.405	19.614	157.32	(1S,2S)-3-oxo-2-pentyl-cyclopentanebutanoic acid, [M-H]1-; 7-oxo-11E-Tetradecenoic acid, [M-H]1-	Unknown	16859	15736.8	14545.8	14375.4	15492.8	13580.7	20399.2	26394	24915.4	27721.2	30123.9	25156.3	28996.5	25281.7	25112.3	2069.37	100445	12954	30389.1	27947.9	30757.6	34035.9	20814.5	35095.8	58344.8	63367.2	58702	10837.1	13595.3	13893	64048.8	71092.7	69801.7	70701.3	77772.4	87168.1
met_5585	321.167	7.408	23.53	186.63	(1S,2S)-3-oxo-2-pentyl-cyclopentanebutanoic acid, [M-H+CH3COONa]1-; 7-oxo-11E-Tetradecenoic acid, [M-H+CH3COONa]1-	Unknown	136689	155509	140098	78654.1	89297.1	97656.1	8208.4	8082.08	4118.72	7323	8006.99	7304.32	200928	174561	166492	102079	100445	97240.8	7771.35	6969.72	8642.19	6812.26	6805.79	8464.32	172799	201159	171479	79863.6	103446	106961	21882.1	28931.2	21641.3	18317.7	24871	22454.3
met_696	289.181	7.481	21.893	174.25	4-oxo-9Z,11Z,13E,15E-octadecatetraenoic acid, [M-H]1-; 8-hydroxy-13Z-octadecene-9,11-diynoic acid, [M-H]1-; 8-oxo-9,11-octadecadiynoic acid, [M-H]1-; 8-hydroxy-17-octadecene-9,11-diynoic acid, [M-H]1-; 8-hydroxy-17-octadecene-10,12-diynoic acid, [M-H]1-	Unknown	84537.8	83260.1	89130.4	43471.2	40536.2	28211.2	101031	119351	106452	106885	132082	134049	138432	119592	123339	41082.9	1199.39	35524.9	125002	112527	120673	148773	103347	130063	119436	148246	295467	58894.9	32681.2	48279.3	199047	243966	234733	182687	228237	233774
met_2213	480.144	7.482	26.394	206.8	Unknown	Unknown	32638.9	22731.7	25852.7	30736.4	32563	24316.7	22795.3	32150	23612.1	25439.1	34890.8	29914.5	43612.8	32516.7	27587.8	39517.1	43850	32529.4	29752.6	31468.8	30840.5	42030.1	24793.2	32185.6	46092.4	44775.7	53642.4	44606.8	58577.9	57151.1	47139.5	63304.8	60613.7	49764.1	56068.1	61362.8
met_8265	223.133	7.514	20.485	165.02	13-Oxo-9,11-tridecadienoic acid, [M-H]1-; Furfuryl octanoate, [M-H]1-; Methyl jasmonate, [M-H]1-	Unknown	5900.41	5383.86	3113.39	5549.88	6245.5	4280.66	3034.76	5735.73	4896.51	5054.44	4141.43	2117.72	4866.06	3932.16	6968.15	6462.52	4518.24	5767.58	4858.06	6160.33	4109.94	7358.57	3351	6196.39	3707.31	4983.75	3598.56	6180.52	5705.28	5465.67	7292.5	5000.56	4578.23	5578.86	5128.64	6379.06
met_1890	351.216	7.587	23.22	183.52	10,11-dihydro-Resolvin E1, [M-H]1-; 12-epi-12-iso-LGD2, [M-H]1-; 12-epi-12-iso-LGE2, [M-H]1-; 13,14-Dihydro-15-oxo-lipoxin A4, [M-H]1-; 13,14-dihydro-15-keto-LXA4, [M-H]1-; 13,14-dihydro-15-keto-PGD2, [M-H]1-; 13,14-dihydro-15-keto-PGE2, [M-H]1-; 15-keto-PGE1, [M-H]1-; 15-keto-PGF2alpha, [M-H]1-; 20-hydroxy LTB4, [M-H]1-; 5,14,15-trihydroxy-6,8,10,12-Eicosatetraenoic acid, [M-H]1-; 5-epi-5-iso-LG…	PG-like, [M-H]1-	136689	155509	140098	78654.1	89297.1	97656.1	110198	16515.1	19846.9	20962	29231.5	114850	200928	174561	10520.1	102079	100445	97240.8	141025	142363	16415	33649	112104	20743.2	34697	77965.6	71114.4	79863.6	103446	106961	69460.2	97605.3	91317.9	75688.8	29284.5	81327.8
met_7474	341.046	7.601	22.079	174.57	Unknown	Unknown	7990.62	11511.7	3579.06	6970.14	6622.28	7555.44	4731.59	5989.09	6419.3	8073.16	6584.07	9086.92	3307.3	4871.79	4258.33	8617.5	4089.56	5637.41	5289.28	6406.26	5742.21	9068.27	4888.39	8412.7	3309.6	9793.71	6978.85	7043.35	6091.56	7743.35	7263.89	8697.12	5814.14	6062.14	7369.12	3047.52
met_7548	436.117	7.629	24.946	195.88	Unknown	Unknown	4832.58	6231.59	5172.52	8259.14	4842.01	4878.28	2292.51	5730.2	2924.7	5530.6	6773.41	4870.87	7901.47	6584.37	11319.1	12971.6	2998.54	7959.49	7973.96	7812.13	5598.32	9013.51	5812.38	10196.8	8171.34	5523.14	7114.56	8850.37	6365.41	10680.3	5779.11	7650.76	6686.85	3877.63	9361.91	7868.45
met_7614	315.195	7.629	23.368	185.46	preclavulone lactone I, [M-H]1-; 8-deoxy-J2-IsoP, [M-H]1-; ent-15-deoxy-J2-IsoP, [M-H]1-; 5-deoxy-J2-IsoP, [M-H]1-; 12-deoxy-J2-IsoP, [M-H]1-; PGA2 1,15-lactone, [M-H]1-; 15-deoxy-delta-12,14-PGJ2, [M-H]1-; 15-deoxy-delta-12,14-PGA2, [M-H]1-	Unknown	6456.73	7508.74	4159.34	6360.04	5129.56	5003.47	7324.33	7990.99	5556.89	10980.1	3970.5	4394.59	6761.08	1895.52	5614.33	6952.44	4775.38	5453.16	6815.21	6696.62	5801.08	7242.44	3200.84	8412.05	17474	2548.57	5903.17	4198.61	6546.73	4000.74	5556.9	7612.05	6858.52	6381.73	2978.8	5665.55
met_6798	335.221	7.689	23.056	182.53	(+/-)11,12-Ep-15S-HETrE, [M-H]1-; 10,11-dihydro-12-oxo-LTB4, [M-H]1-; 11,12-DiHETE, [M-H]1-; 11,12-epoxy-8-hydroxyeicosa-5,9,14-trienoic acid, [M-H]1-; 11-HpETE, [M-H]1-; 11-deoxy-PGE2, [M-H]1-; 12S-HpETE, [M-H]1-; 14,15-DiHETE, [M-H]1-; 14,15-Ep-11-HETrE, [M-H]1-; 14,15-HxA3 (11S), [M-H]1-; 14,15-HxB3 (13R), [M-H]1-; 14,15-dihydroxy-5,8,10,12-eicosatetraenoic acid, [M-H]1-; 14-hydroperoxy-5Z,8Z,…	LT-like, [M-H]1-	6136.92	6893.67	7324.06	5550.77	7836.23	7597.08	9699.45	5305.57	6912.1	9868.12	5073.52	6977.54	6630.91	5973.89	7618.9	7204.8	7446.41	7301.91	7435.36	6253.73	8944.43	5449.32	8295.71	12024.5	11030.2	7464.15	4699.99	4557.65	8601.21	6950.13	5262.6	7215.68	8844.95	6620.35	7785.7	7122.85
met_2677	348.087	7.698	22.387	176.91	Unknown	Unknown	10758.6	8700.37	13730	15313	10439.7	9997.38	8160.62	10625.1	14607.8	16757.9	7261.04	12030.9	8857.69	12632.7	5060.37	65575.7	14031.1	56194.6	29270.5	2789.18	29043.7	16008	7933.93	19434.8	15966.1	13945.4	2222.8	40364.7	26635.6	43287.9	9399.76	14913.4	32063.7	28914.7	23747.6	31465
met_5264	239.126	7.698	20.18	161.93	Unknown	Unknown	8300.93	5713.94	8434.97	5607.94	7421.91	3072.15	6664.37	5458.29	7429.41	6346.36	4150.03	6756.34	11886.3	12664.5	12300	35086.3	6702.39	26876.7	15728.8	8533.09	12670.7	3994.79	1730.8	10225.5	14370.8	10467.3	14236.9	17026.1	10248.1	22900.9	9286.62	3866.85	17017.1	10713.3	10677.2	12441.8
met_4099	333.084	7.699	21.912	173.4	Unknown	Unknown	14532.8	11983.9	11157	8267.3	7882.16	13557.5	4940.06	11337.3	14391	11126.6	10580.8	13877.8	6714.1	14011.6	16743.3	38362.2	6765.68	46548.5	18295.8	13797.8	19609.2	2761.88	2716.69	10329.1	17652.7	12873.5	18536.9	24904.9	13761	24362.4	14401	6763.32	19480.7	26905.2	11169.3	18602.3
met_5142	462.026	7.7	25.04	196.31	Unknown	Unknown	136689	155509	140098	7736.77	89297.1	4492.47	110198	117850	115293	122429	114960	5196.29	200928	174561	166492	38956.1	100445	26855.8	14399.3	3488.27	12345	6824.66	112104	11703.9	172799	201159	171479	18226.4	8762.95	24942.5	145414	10173	20663.6	7618.72	12406.1	16385.9
met_1644	300.066	7.701	20.85	165.59	Unknown	Unknown	20012.8	15360.7	16674.8	7671.4	4075.22	41411.4	11797.3	33530.8	21514.1	44324.3	3474.58	24273.2	4139.51	28480	9010.73	48826.3	4280.88	274306	37420.6	20033.2	61787.4	7332.5	19368.5	10695	12469.7	22433.1	22994.1	70357.9	12097.1	17291.6	8669.58	8173.33	17984.2	127036	6401.46	69396.4
met_4658	603.042	7.701	27.922	217.69	Unknown	Unknown	136689	155509	140098	8716.62	5048.4	9429.64	110198	117850	115293	7864.58	114960	114850	200928	174561	166492	36025.6	100445	36071.4	20441.6	142363	18558.2	143568	112104	9707.75	172799	201159	171479	23788.9	12193.5	21967.1	145414	5505.65	16525.6	20184.2	7660.25	20976.2
met_6004	315.111	7.701	22.133	175.56	Unknown	Unknown	136689	155509	140098	6398.79	89297.1	97656.1	110198	117850	115293	3072.17	114960	114850	4375.03	174561	980.153	27816	2355.77	19450.7	9753.76	142363	10764.8	5746.26	112104	9439.49	172799	201159	171479	14314.5	10504.2	25730.5	145414	7962.66	15424	157032	9494.89	10534.5
met_2461	331.084	7.702	22.04	174.47	Unknown	Unknown	15189.9	15140.7	15375.3	20961.6	15014.5	5427.19	10015.9	7299.14	16883.6	16677.2	14703.9	8700.37	10753.3	18479.9	12027	70467.9	16099	53721.8	32675.2	6320.44	29819.6	20620.7	7660.48	23488.5	22711.7	19214.3	16552.8	38813.2	32771.3	56613	7479.38	19889.2	45237	26010.5	23195.1	26659
met_716	390.097	7.707	23.659	186.32	Unknown	Unknown	7646.7	35969.7	39465.7	67524.2	48543.7	51055.1	35078.9	40197.9	8176.59	71221.6	43598.5	37054.1	42091.1	8328.19	32584.7	300694	64818.8	289992	141537	21797.6	128388	62674.2	28593.4	94559.3	10849.6	38487.9	55919.3	195888	112760	205624	41813.2	80446.9	164992	140080	88298.4	138438
met_1640	241.18	7.743	20.047	160.77	10-keto myristic acid, [M-H]1-; 12-hydroxy-13-tetradecenoic acid, [M-H]1-; 12-methyl-10-oxo-tridecanoic acid, [M-H]1-; 13-keto myristic acid, [M-H]1-; 14-hydroxy-12-tetradecenoic acid, [M-H]1-; 14-hydroxy-5Z-tetradecenoic acid, [M-H]1-; 2-oxo-tetradecanoic acid, [M-H]1-; 3-oxo-tetradecanoic acid, [M-H]1-; 4-keto myristic acid, [M-H]1-; 6-oxo-tetradecanoic acid, [M-H]1-; 7-Oxotetradecanoic acid, […	Unknown	10278.7	12377.6	11247.2	3145.61	6405.48	11282.1	8079.22	7877.48	5512.31	6070.27	10826.1	25367.1	27553.9	27601.3	28693.4	4295.14	11874.1	8174.52	22940.9	18066.4	25361.3	23358.6	20742.2	24676.3	98211.3	102502	89127.6	6060.01	7545.04	8810.66	61599.1	57494.4	60018.4	61881.5	77596.8	65633.5
met_3762	229.972	7.754	19.265	154.8	Unknown	Unknown	12579.5	11634	8029.15	19085.1	7283.88	13260.5	10338.2	22149.8	8510.57	6474.93	13410.8	9318.91	16614.7	16077.3	12936.5	12052.2	9618.24	16805.9	10536.3	8822.31	9518.56	10831.9	11622.1	13317.7	10596	29585.3	13735.4	9632	9095.01	6589.92	7561.95	14027.1	21730.2	11339	5890.69	18163.5
met_5939	238.98	7.803	19.455	156.05	Unknown	Unknown	136689	155509	140098	78654.1	89297.1	10124.4	110198	117850	115293	13739.1	19203.5	114850	200928	28546.1	10684.6	28218.9	100445	19246.6	141025	142363	5350.72	7989.55	20480.1	10933.5	172799	3975.23	171479	79863.6	2545.95	106961	145414	156024	144376	2691.1	145810	18265.5
met_2083	293.175	7.826	21.49	170.92	Unknown	Unknown	34640.6	31225.7	23692.6	20797.4	20985.3	19633.9	23366.6	21017.5	31605.7	22575.3	19854.8	20529.9	16371.3	19106.2	17737.5	20357	17505.8	11225.6	16756	12624.5	16062.3	20816.5	13568.8	13546.2	19412.7	22092.5	21946.9	19337.5	24475.2	25539.7	18535.8	21966.7	19052.7	19749.1	21926.1	22824.1
met_6765	448.305	7.85	25.124	197.14	Unknown	Unknown	7804.58	8071.92	8740.33	3251.89	6524.87	9101.2	7103.85	5173.75	7835.27	7527.19	8486.41	8940.41	4133.26	6217.97	4771.94	6341.65	5017.7	4307.1	4584.02	6088.77	5155.66	6020.64	2914.42	7561.33	5678.62	3926.54	4479.88	5085.66	4697.77	3608.41	5273.89	6235.21	6001.56	5177.88	7205.38	3100.74
met_3253	433.219	7.858	25.934	203.77	10,11-dihydro-Resolvin E1, [M-H+CH3COONa]1-; 12-epi-12-iso-LGD2, [M-H+CH3COONa]1-; 12-epi-12-iso-LGE2, [M-H+CH3COONa]1-; 13,14-Dihydro-15-oxo-lipoxin A4, [M-H+CH3COONa]1-; 13,14-dihydro-15-keto-LXA4, [M-H+CH3COONa]1-; 13,14-dihydro-15-keto-PGD2, [M-H+CH3COONa]1-; 13,14-dihydro-15-keto-PGE2, [M-H+CH3COONa]1-; 15-keto-PGE1, [M-H+CH3COONa]1-; 15-keto-PGF2alpha, [M-H+CH3COONa]1-; 20-hydroxy LTB4, [M-…	PG-like, [M-H+CH3COONa]1-	136689	155509	140098	78654.1	89297.1	97656.1	13260.4	16684	18957.7	14048.4	22683.1	22220.2	200928	174561	166492	102079	100445	97240.8	19548.2	19406	18370.9	26226.9	18768.1	23557.7	172799	201159	171479	79863.6	103446	106961	37872	39978.7	39325.1	28724.3	37921.1	40232
met_320	351.217	7.859	23.434	185.21	10,11-dihydro-Resolvin E1, [M-H]1-; 12-epi-12-iso-LGD2, [M-H]1-; 12-epi-12-iso-LGE2, [M-H]1-; 13,14-Dihydro-15-oxo-lipoxin A4, [M-H]1-; 13,14-dihydro-15-keto-LXA4, [M-H]1-; 13,14-dihydro-15-keto-PGD2, [M-H]1-; 13,14-dihydro-15-keto-PGE2, [M-H]1-; 15-keto-PGE1, [M-H]1-; 15-keto-PGF2alpha, [M-H]1-; 20-hydroxy LTB4, [M-H]1-; 5,14,15-trihydroxy-6,8,10,12-Eicosatetraenoic acid, [M-H]1-; 5-epi-5-iso-LG…	PG-like, [M-H]1-	149605	141025	135132	73243.2	50844.9	52079.1	222720	269403	256188	260635	282730	296636	257972	232715	248995	15515.1	14780.3	11222.1	320713	311077	297190	376107	273552	324540	258670	31407.6	272041	13236.5	178291	11902.6	513083	623499	3342.39	469936	582329	561914
met_411	267.196	7.906	20.843	166.4	(1R,2R)-3-oxo-2-pentyl-cyclopentanehexanoic acid, [M-H]1-	Unknown	149323	112829	113916	148669	124896	100511	160600	115403	123554	173858	118189	144980	152605	81739.5	155860	209553	101588	129328	168385	97419	138112	149276	99481.1	180824	146217	124874	123379	152251	135884	198901	130921	124813	172907	128499	128119	148924
met_6044	359.221	7.909	23.85	188.4	14S,21S-diHDHA, [M-H]1-; Neuroprotectin D1, [M-H]1-; Resolvin D5, [M-H]1-; Resolvin D6, [M-H]1-; 17S-HpDHA, [M-H]1-; Maresin 1, [M-H]1-; 14S-HpDHA, [M-H]1-; 7,9,13,17-tetramethyl-7S,14S-dihydroxy-2E,4E,8E,10E,12E,16-octadecahexaenoic acid, [M-H]1-	Unknown	6363.62	8013.18	8180.92	14431	7339.69	5888.3	2717.06	5757.27	6829.24	3265	3605.63	8179.25	4033.76	3745.82	5986.7	9593.64	7889.55	6550.62	7876.5	10578.4	6226.75	5334.66	6527.88	7846.62	6837.35	9405.27	9638.35	5624.17	9873.1	5514.07	16192.5	15539.8	16358.1	14858.6	19938.8	18428.3
met_3666	335.221	8.001	24.876	197.1	(+/-)11,12-Ep-15S-HETrE, [M-H]1-; 10,11-dihydro-12-oxo-LTB4, [M-H]1-; 11,12-DiHETE, [M-H]1-; 11,12-epoxy-8-hydroxyeicosa-5,9,14-trienoic acid, [M-H]1-; 11-HpETE, [M-H]1-; 11-deoxy-PGE2, [M-H]1-; 12S-HpETE, [M-H]1-; 14,15-DiHETE, [M-H]1-; 14,15-Ep-11-HETrE, [M-H]1-; 14,15-HxA3 (11S), [M-H]1-; 14,15-HxB3 (13R), [M-H]1-; 14,15-dihydroxy-5,8,10,12-eicosatetraenoic acid, [M-H]1-; 14-hydroperoxy-5Z,8Z,…	LT-like, [M-H]1-	14562.4	9407.82	12187.6	12276.1	16715.7	14139.8	6594.16	9042.46	9654.83	3902.66	6686.71	7612.51	17911.5	19804.6	17599.8	13473.1	10786.2	13378.8	11276.7	9721.56	7829.68	20809.3	12504.1	12044.6	23205.8	25946	24055.4	12709.7	15103.3	16190	17922.8	21929.2	15667.2	16517.3	18138.6	15046.7
met_6443	255.196	8.058	20.085	160.63	11-keto pentadecanoic acid, [M-H]1-; 14-keto pentadecanoic acid, [M-H]1-; 2-oxo-pentadecanoic acid, [M-H]1-; 3-oxo-pentadecanoic acid, [M-H]1-; 4-keto pentadecanoic acid, [M-H]1-	Unknown	21391.2	155509	140098	78654.1	89297.1	11902.8	110198	117850	115293	122429	114960	15310.7	12225	5800.77	9295.34	102079	100445	97240.8	141025	8417.19	15380.5	20324.3	112104	9167.86	12663.5	10624.2	13044.1	79863.6	103446	106961	145414	156024	144376	157032	145810	154750
met_1754	335.222	8.087	23.303	184.5	(+/-)11,12-Ep-15S-HETrE, [M-H]1-; 10,11-dihydro-12-oxo-LTB4, [M-H]1-; 11,12-DiHETE, [M-H]1-; 11,12-epoxy-8-hydroxyeicosa-5,9,14-trienoic acid, [M-H]1-; 11-HpETE, [M-H]1-; 11-deoxy-PGE2, [M-H]1-; 12S-HpETE, [M-H]1-; 14,15-DiHETE, [M-H]1-; 14,15-Ep-11-HETrE, [M-H]1-; 14,15-HxA3 (11S), [M-H]1-; 14,15-HxB3 (13R), [M-H]1-; 14,15-dihydroxy-5,8,10,12-eicosatetraenoic acid, [M-H]1-; 14-hydroperoxy-5Z,8Z,…	LT-like, [M-H]1-	30120	16259.6	26964.4	30975.5	36274	34483.7	24412.5	26276.2	22529.5	24365.7	30535.6	51963.7	39853	33328.6	33067.8	19574	32228.5	23772.7	38714.9	37024.2	38777.4	28914.4	37019.6	40918.7	53221.2	62249.2	51095.2	44447.1	48056.5	33736.4	68366.5	78508.7	77628.2	61241.7	73995.5	92585.7
met_6391	241.18	8.141	19.709	158.02	10-keto myristic acid, [M-H]1-; 12-hydroxy-13-tetradecenoic acid, [M-H]1-; 12-methyl-10-oxo-tridecanoic acid, [M-H]1-; 13-keto myristic acid, [M-H]1-; 14-hydroxy-12-tetradecenoic acid, [M-H]1-; 14-hydroxy-5Z-tetradecenoic acid, [M-H]1-; 2-oxo-tetradecanoic acid, [M-H]1-; 3-oxo-tetradecanoic acid, [M-H]1-; 4-keto myristic acid, [M-H]1-; 6-oxo-tetradecanoic acid, [M-H]1-; 7-Oxotetradecanoic acid, […	Unknown	136689	155509	140098	78654.1	89297.1	6040.57	4449.6	4631.73	5024.95	8449.79	2917.57	114850	200928	174561	166492	102079	100445	97240.8	141025	142363	142498	143568	4510.63	3667.43	172799	201159	171479	79863.6	103446	106961	16510.3	23348	23745.5	22868	22458.4	26305.4
met_2949	516.272	8.144	28.005	219.16	Unknown	Unknown	20145.6	27831.2	14167.5	78654.1	89297.1	97656.1	110198	117850	115293	122429	114960	114850	89884.8	52085.6	41471.3	102079	100445	97240.8	2096.82	142363	4029.49	8385.16	112104	140749	39526.9	78451.9	36823.9	79863.6	103446	106961	5919.02	156024	144376	5107.04	5721.72	154750
met_7068	542.287	8.146	28.469	222.53	Unknown	Unknown	6208.12	14983.5	7610.99	78654.1	89297.1	97656.1	110198	117850	115293	122429	114960	114850	28561	13328.2	18011.4	102079	100445	97240.8	141025	142363	142498	4679.37	112104	140749	10222.8	23237.4	15059.2	79863.6	103446	106961	145414	156024	144376	157032	145810	154750
met_4411	238.98	8.164	19.437	155.9	Unknown	Unknown	14144.3	9958.6	11468.1	13972.2	9161.44	10187	8997.73	11266	11033.9	32929.7	15928.9	5704.94	15608.5	13859.6	15538.3	24881.2	9355.37	16693.1	11360.5	10659.9	11543.3	22883.8	13834	9406.35	13460	11589.8	34299.5	11714.8	11192.9	9367.63	11319.4	13647.5	11860.2	11843.4	11644.1	14769.8
met_889	335.222	8.166	23.314	184.58	(+/-)11,12-Ep-15S-HETrE, [M-H]1-; 10,11-dihydro-12-oxo-LTB4, [M-H]1-; 11,12-DiHETE, [M-H]1-; 11,12-epoxy-8-hydroxyeicosa-5,9,14-trienoic acid, [M-H]1-; 11-HpETE, [M-H]1-; 11-deoxy-PGE2, [M-H]1-; 12S-HpETE, [M-H]1-; 14,15-DiHETE, [M-H]1-; 14,15-Ep-11-HETrE, [M-H]1-; 14,15-HxA3 (11S), [M-H]1-; 14,15-HxB3 (13R), [M-H]1-; 14,15-dihydroxy-5,8,10,12-eicosatetraenoic acid, [M-H]1-; 14-hydroperoxy-5Z,8Z,…	LT-like, [M-H]1-	19402.4	41050.3	16440.3	56987.9	18539.3	25747.2	52121.2	57742.4	58180.7	49491	74870.1	15829.8	37139.4	38293.2	35151.1	26740.9	31558.5	13740.4	94688.9	78402.2	90666.5	113332	51859.5	98560.4	42468.7	48442.6	88309.7	28567.9	13047.1	21224.7	158531	195214	171126	143342	179687	194171
met_9538	448.153	8.167	25.229	197.99	Unknown	Unknown	136689	155509	140098	78654.1	89297.1	97656.1	1784.78	3480.65	115293	2794.99	2222.91	114850	200928	174561	166492	102079	100445	97240.8	6943.08	142363	5613.8	6752.23	4389.12	5267.28	2961.06	201159	171479	79863.6	103446	106961	5280.57	7669.34	8920.71	8651.64	9306.49	10980.3
met_5920	618.339	8.184	31.739	247.59	Unknown	Unknown	10573	18600.6	11538.5	78654.1	89297.1	97656.1	110198	117850	115293	122429	114960	1936.74	43091.8	22669.6	18242.4	102079	100445	97240.8	141025	142363	2696.55	4834.84	1895.14	4572.05	18151.1	34037.6	14632.4	79863.6	103446	106961	145414	156024	144376	2036.19	145810	154750
met_8069	243.196	8.263	19.817	158.82	10-hydroxy-tetradecanoic acid, [M-H]1-; 11-hydroxy-tetradecanoic acid, [M-H]1-; 3-hydroxy-tetradecanoic acid, [M-H]1-; 5-hydroxy-tetradecanoic acid, [M-H]1-; 6-hydroxy-tetradecanoic acid, [M-H]1-; alpha-hydroxy myristic acid, [M-H]1-; omega-hydroxy myristic acid, [M-H]1-	Unknown	6111.21	6104.32	6253.09	2873.28	3407.86	6446.7	6860.84	6325.54	7244.35	6129.06	9568.1	7720.12	3388.79	5640.11	10115.5	4330.7	6749.33	6356.78	5520.12	5794.82	3703.72	4521.11	5030.94	5283.97	1897.17	2602.66	5738.93	5492.52	4260.81	6288.66	4180.33	2822.84	5244.06	5607.44	4944.21	3241.57
met_522	445.199	8.271	27.354	214.86	Unknown	Unknown	71865.3	70007.7	67825.2	76812.5	74153.6	74330.3	85654.6	69970.1	68812.4	63730	82609.4	77009.6	128402	117169	94289.8	151488	121560	91925	95103.3	82093.8	89615.5	89365.4	86136.3	108864	106495	137276	122285	155245	164721	176778	122834	135893	140917	103544	131252	124585
met_2301	421.154	8.272	26.248	206.45	Unknown	Unknown	11056.4	14856.9	10563	10286	15533.8	9406.77	17824.6	8941.72	11823.2	11843.8	8006.46	14522.8	22039.3	18435	14893.1	24586.1	22527.2	12894.4	15329.1	19969.8	13217.7	16691.8	20217.5	22077.8	24750.4	27084.7	22034.3	18504.6	36020.3	38375.8	21097	25194.2	25893.2	13725.8	31157.8	20148.9
met_6120	516.271	8.462	27.945	218.65	Unknown	Unknown	9358.76	5976.82	6255.42	8211.32	10529.9	10706.4	5020.17	10343.2	9841.91	8919.51	9253.56	3756.26	5715.23	11708.6	11864.5	9284.87	8318.76	11122.5	10021.1	8959.13	11151.1	8662.06	5073.16	4423.86	10276	13811	9342.75	10477.7	9956.89	8342.67	7023.47	8676.72	6977.92	5377.81	5992.02	8671.29
met_4446	417.224	8.576	25.343	199.31	Unknown	Unknown	136689	155509	140098	78654.1	89297.1	97656.1	110198	11734.7	5787.3	122429	7903.62	17656.7	200928	174561	166492	102079	100445	97240.8	14227.9	12701.9	15987	21267.8	16041.2	14312.7	172799	201159	171479	79863.6	103446	106961	27061.2	28063.3	32955.2	20606.7	26606.7	26298.8
met_660	335.222	8.597	23.311	184.56	(+/-)11,12-Ep-15S-HETrE, [M-H]1-; 10,11-dihydro-12-oxo-LTB4, [M-H]1-; 11,12-DiHETE, [M-H]1-; 11,12-epoxy-8-hydroxyeicosa-5,9,14-trienoic acid, [M-H]1-; 11-HpETE, [M-H]1-; 11-deoxy-PGE2, [M-H]1-; 12S-HpETE, [M-H]1-; 14,15-DiHETE, [M-H]1-; 14,15-Ep-11-HETrE, [M-H]1-; 14,15-HxA3 (11S), [M-H]1-; 14,15-HxB3 (13R), [M-H]1-; 14,15-dihydroxy-5,8,10,12-eicosatetraenoic acid, [M-H]1-; 14-hydroperoxy-5Z,8Z,…	LTB4, [M-H]1-	93748.9	91092.8	100139	65242.6	62467.1	32968.5	91861.2	111386	107301	106308	114083	119189	138987	114821	123104	50437.5	2123.46	42980.1	131978	123181	130361	185555	107221	148417	3275.26	133798	166725	58894.9	40191.4	48279.3	227444	270048	259173	213552	235840	263367
met_981	249.15	8.743	19.897	159.29	Unknown	Unknown	88027	87673	94619	65283.8	58171.5	58134.4	76344.4	66219.3	102189	69091.5	68870.5	69651.6	46022.4	35199.8	49386.7	44515.7	28149.1	33996.6	42733.1	2309.72	48008.7	45852.3	38793.1	37467	59073.7	50507	55475.2	50421.2	49547.9	64856.2	3209.52	53938.3	57064.1	50649.8	53727.9	53117.9
met_4028	469.363	8.8	27.274	213.9	Unknown	Unknown	17513.1	10870.9	10639.9	99620.3	21358.6	26936.1	14318.8	15490	22013.7	18474	17603.4	25123.3	3349.36	6845.8	7551.35	2929.25	7778.73	5102.09	3430.47	3700.33	2319.78	7775.47	8465.64	2791.25	6199.95	1935.7	1904.53	4492.06	7291.24	9709.5	7768.8	6549.22	7343.07	4932.47	5202.02	3458.26
met_2997	283.11	8.857	21.269	169.4	Unknown	Unknown	18535.2	16802.8	21467.2	35372.3	20359	11672.8	30859.3	18904.6	21230.6	21020.3	25000.5	16570	16395.1	15545.6	16727.4	26055.2	10478.9	18885.3	11492.8	16663.1	12769.5	16062.9	20202.6	7244.49	7484.68	17272.6	17851.6	9403.46	19885.6	23484	16260.3	20831.1	18911.8	17651.8	20247.9	30156.4
met_5779	279.195	8.869	21.005	167.37	12-hydroxy-5,8,10-heptadecatrienoic acid, [M-H]1-; 12S-HHTrE, [M-H]1-; Dihydropanaxacol, [M-H]1-; methyl (2E,6E,10R,11S)-10,11-epoxy-3,7,11-trimethyltrideca-2,6-dienoate, [M-H]1-	Unknown	136689	155509	140098	78654.1	89297.1	97656.1	6419.71	11246.3	8515.28	8840.78	9734.19	10672.7	200928	174561	166492	102079	100445	97240.8	10286.2	12441.2	10192.8	12586.2	112104	10369.2	172799	201159	171479	79863.6	103446	106961	15296.2	21317.5	21155.9	14714.6	18707.7	18250.5
met_2129	444.971	8.897	19.048	148.97	Unknown	Unknown	25810.4	18735.5	22461.2	22980.2	17916.9	18229.8	27131.3	26902.5	15448.4	25777.8	18822	18701.8	15893	17393.6	13474.4	22537.7	19899.9	23475.3	13420.2	21744.6	23393.8	15305.1	19553.3	20662.7	16177.9	21504.5	15070.1	30158.6	21563.1	15796.9	25064.3	25227.4	21388.7	18269.7	27831.7	25340.3
met_688	380.976	8.897	19.005	149.37	Unknown	Unknown	89486	77757.6	89843.6	80860	55219.4	63756.4	100279	83119.3	67120.7	103798	73641.4	76275.5	59974.5	76904.1	52425.4	89141.7	80655.2	85783.8	65150.9	70581.9	92034.5	59093.8	67552.2	77475.1	65002.9	64657.9	59534.5	110572	76216.8	62545.2	76600.9	86695.7	74490.9	67322.6	88890.6	106197
met_3233	343.211	8.921	23.102	182.72	Unknown	Unknown	16572.6	10675.9	13804.7	10438.7	8313.23	12175.5	10333.7	9643.6	13565.7	13390.6	10020	12316	20156.2	15292.1	18576	13617.3	12405.6	9965.28	11655.7	13993.9	25881	13737.2	11987	12936.4	11783.1	11985.6	11734.8	15816.3	12087.5	14961.2	13936.9	12767.3	13272.5	11517	16451.1	13542.8
met_834	265.18	8.957	20.598	164.47	(2E,6E,10R,11S)-10,11-epoxy-3,7,11-trimethyltrideca-2,6-dienoic acid, [M-H]1-; (9R,13R)-1a,1b-dinor-10,11-dihydro-12-oxo-15-phytoenoic acid, [M-H]1-; 10,11-epoxy-3,7,11-trimethyl-2E,6E-tridecadienoic acid, [M-H]1-; Tetranor-12R-HETE, [M-H]1-	Unknown	3450.89	34313.7	5590.15	21172.8	4021.11	6278.98	69565.6	61842.6	73043.8	69457.7	81475.2	82661.8	42516.8	4376.66	8114.21	11780.5	14412	13740.4	131486	114058	134999	140939	112384	111348	10976.6	1963.7	7153.7	11576.9	13047.1	13610.9	161094	177350	160069	129456	171829	158051
met_155	335.222	8.983	23.354	184.9	(+/-)11,12-Ep-15S-HETrE, [M-H]1-; 10,11-dihydro-12-oxo-LTB4, [M-H]1-; 11,12-DiHETE, [M-H]1-; 11,12-epoxy-8-hydroxyeicosa-5,9,14-trienoic acid, [M-H]1-; 11-HpETE, [M-H]1-; 11-deoxy-PGE2, [M-H]1-; 12S-HpETE, [M-H]1-; 14,15-DiHETE, [M-H]1-; 14,15-Ep-11-HETrE, [M-H]1-; 14,15-HxA3 (11S), [M-H]1-; 14,15-HxB3 (13R), [M-H]1-; 14,15-dihydroxy-5,8,10,12-eicosatetraenoic acid, [M-H]1-; 14-hydroperoxy-5Z,8Z,…	LT-like, [M-H]1-	191172	173457	177459	73214	64088	6867.16	351508	383983	385173	363611	425601	430651	373601	360863	356749	64234.8	78208.1	55408.2	594615	561659	557464	705434	455815	587636	405514	426530	458257	48725.7	34506.7	46378.6	949851	1110002	1052737	816225	1024794	1007503
met_1601	417.225	8.983	25.8	202.95	(+/-)11,12-Ep-15S-HETrE, [M-H+CH3COONa]1-; 10,11-dihydro-12-oxo-LTB4, [M-H+CH3COONa]1-; 11,12-DiHETE, [M-H+CH3COONa]1-; 11,12-epoxy-8-hydroxyeicosa-5,9,14-trienoic acid, [M-H+CH3COONa]1-; 11-HpETE, [M-H+CH3COONa]1-; 11-deoxy-PGE2, [M-H+CH3COONa]1-; 12S-HpETE, [M-H+CH3COONa]1-; 14,15-DiHETE, [M-H+CH3COONa]1-; 14,15-Ep-11-HETrE, [M-H+CH3COONa]1-; 14,15-HxA3 (11S), [M-H+CH3COONa]1-; 14,15-HxB3 (13R)…	LT-like, [M-H+CH3COONa]1-	12827	10759.6	12430.7	17696.5	11117	20535.6	26335.8	22193.9	31527.5	27228	30405.5	33325.1	26560.3	25987.9	25211.4	28217.7	39406.6	26008.9	42567.9	41207.8	34414.1	51067.1	32813	45142.4	26883.6	29032.3	35344.7	22964.9	28492.8	22352.5	67289.8	79354	79126.5	54774.4	74487.6	68124.8
met_4297	317.211	8.984	23.319	185.03	11(12)-EpETE, [M-H]1-; 11-oxo-5E,8Z,12Z,14Z-Eicosatetraenoic acid, [M-H]1-; 11R-HEPE, [M-H]1-; 14(15)-EpETE, [M-H]1-; 14,15-LTA4, [M-H]1-; 15-HEPE, [M-H]1-; 15-Oxo-ETE, [M-H]1-; 15S-HEPE, [M-H]1-; 15d-PGA1, [M-H]1-; 17(18)-EpETE, [M-H]1-; 18R-HEPE, [M-H]1-; 4,5-LTA4, [M-H]1-; 5-Oxo-ETE, [M-H]1-; 5S-HEPE, [M-H]1-; 8(9)-EpETE, [M-H]1-; 8-oxo-5E,9Z,11Z,14Z-eicosatetraenoic acid, [M-H]1-; 9-hydroxy-2…	HEPE-like, [M-H]1-; oxoETE-like, [M-H]1-	4835.6	8061.29	4565.78	13816.9	6089.14	6901.2	6124.72	5661.76	5087.35	6550.56	7253.84	12247.3	8350.56	8364.41	3848.76	13462.3	4589.5	12535.7	11521.2	12847.7	19667.6	18231.9	17563.5	21039	9296.46	14422.1	8018.45	8748.37	7940.73	10868.8	18130	19918.3	17204	20549.7	19798.2	33486
met_1300	486.031	8.989	25.05	196.12	Unknown	Unknown	65410.4	44170.7	32374.5	37994.1	39256.3	107163	9462.52	95798.2	67947.3	90102.2	41655.8	33158.8	32414.2	39119.5	98149.8	63814.2	34437.5	18730	73034.2	34316.9	114530	36846.5	30417.1	32995.6	31390.7	16464.5	56606.8	34353.4	25956.7	54769.5	47052.4	51854.4	50169.7	47803	48677.8	88722.8
met_8129	506.159	8.999	26.997	211.29	Unknown	Unknown	7158.66	8293.25	3348.17	78654.1	89297.1	97656.1	110198	117850	115293	122429	114960	114850	21201.9	14899.4	16291.2	102079	100445	97240.8	3381.43	142363	142498	4372.55	112104	140749	5803.78	11490.8	8162.62	79863.6	103446	106961	145414	156024	144376	157032	4385.94	154750
met_3829	438.133	9.001	25.086	196.96	Unknown	Unknown	9672.74	10845.8	10399.8	9385.97	6721.06	13465.1	6395.13	11582.8	7396.46	8812.95	9212.91	6133.4	18380	15316.1	15996.5	9743.06	19335.8	23401.3	16088.2	10694.2	15255.2	15741.9	13015.5	15017.2	17850.9	20325.1	18047.9	11909.7	16849.6	12149.9	19451	24458.8	19211.8	2154.38	18783.2	19477.1
met_1088	447.133	9.018	27.013	212.14	Unknown	Unknown	40965	34805.7	45564.6	35345.5	37053	42582.5	42391.5	43703	40520.9	35409.6	42272	45223	27185.9	33704.7	32432.5	54511.8	36180.2	35982.8	34640.2	29654.9	37136.2	34448.5	32466.4	31816.5	63965.8	60665.4	63803.7	70876	68316.2	68363.9	53803.6	47959.6	55014.9	63167.6	63995.2	57136.7
met_999	447.133	9.019	26.072	204.67	Unknown	Unknown	44832.5	44516.9	48508.8	37844.9	45238.9	52454.1	36394.4	47423.6	48369	30290.5	51389.9	48543.6	30942.6	33414.4	34886.6	49699.9	32228.5	36620.9	39445.4	31284.5	42557.8	40878.6	32472.9	39236	68190.6	71506.3	66623.3	69117.7	67377.6	62504.9	57548.4	59657	69894.2	68523.9	69802.7	65073.3
met_8482	265.18	9.075	22.584	180.55	(2E,6E,10R,11S)-10,11-epoxy-3,7,11-trimethyltrideca-2,6-dienoic acid, [M-H]1-; (9R,13R)-1a,1b-dinor-10,11-dihydro-12-oxo-15-phytoenoic acid, [M-H]1-; 10,11-epoxy-3,7,11-trimethyl-2E,6E-tridecadienoic acid, [M-H]1-; Tetranor-12R-HETE, [M-H]1-	Unknown	5892.19	7169.56	3421.53	7822.67	4288.35	7116.08	4314.11	5821.48	5674.94	2370.02	7767.6	1036.17	11890.1	8023.62	10191.4	6338.74	6031.35	6662.95	7318.92	5020.54	7073.84	7813.16	7796.19	6493.84	9948	5432.54	4468.47	6218.74	6530.08	5550.54	2224.13	5209.54	3157.01	6685.43	7426.83	3872.7
met_1060	265.18	9.089	29.871	239.51	(2E,6E,10R,11S)-10,11-epoxy-3,7,11-trimethyltrideca-2,6-dienoic acid, [M-H]1-; (9R,13R)-1a,1b-dinor-10,11-dihydro-12-oxo-15-phytoenoic acid, [M-H]1-; 10,11-epoxy-3,7,11-trimethyl-2E,6E-tridecadienoic acid, [M-H]1-; Tetranor-12R-HETE, [M-H]1-	Unknown	43585.5	39759.6	41708.6	78654.1	12734.4	97656.1	18167	14421	15477.5	11706.8	16362.4	16291	206107	151438	195001	22562.5	23648.8	18103.1	76524.7	71217	79253.2	68791.7	51091.2	68247.6	77081.8	110639	98155.1	79863.6	14286	106961	34031.2	41547.2	39032.3	32120.2	45118.5	42589
met_1147	265.18	9.089	21.155	168.98	(2E,6E,10R,11S)-10,11-epoxy-3,7,11-trimethyltrideca-2,6-dienoic acid, [M-H]1-; (9R,13R)-1a,1b-dinor-10,11-dihydro-12-oxo-15-phytoenoic acid, [M-H]1-; 10,11-epoxy-3,7,11-trimethyl-2E,6E-tridecadienoic acid, [M-H]1-; Tetranor-12R-HETE, [M-H]1-	Unknown	49283.8	52272	48858.8	78654.1	89297.1	97656.1	39122.6	23509.2	36275.2	25959.4	26299.2	26859.9	102100	99327.7	105533	6452.4	100445	6388.11	67658.3	58393.1	71829.3	61959.8	53349.8	69561.1	74099.7	82899.4	61185.9	1567.94	6169.68	8125.84	41156.4	50371.3	52510.7	32446.2	46463.2	44034.2
met_3055	474.1	9.089	25.462	199.5	Unknown	Unknown	16411.2	23200.6	15583.1	22455.8	19703.9	25424.2	17619.2	16221.4	7463.59	18982.7	6907.78	18228.6	36249.9	40806.7	46407.4	18241.2	27492.4	15211.8	27967.1	13524.6	22836.7	24910.6	19782	16574.3	28643.3	32000.8	35714.5	20079	9093.88	18616.1	20936.8	20825.5	20356.3	19859.1	23495.3	20635.2
met_3411	414.089	9.089	24.098	189.46	Unknown	Unknown	14236.5	14149.4	15609.2	13215.5	12391.2	13924.6	5179.15	12865.2	8057.88	6803	7391.55	7201.57	26933.5	20030.1	30930	10031.6	21446.8	1794.67	21235.7	16187.8	19575	20897.4	16469.9	14865.5	17206.2	19870.6	25212.2	23758.9	17637.7	17371.9	12630.9	13219.4	15431.8	16687.8	13577	15784.5
met_3492	408.123	9.089	24.012	188.88	Unknown	Unknown	22752.6	11163	17894.9	12157.7	15552.6	15250.8	11692.8	18190	14413.6	18501.8	12791.2	5972.9	10193.1	14981.2	44038.6	11757.4	10800	4986.38	22590.8	13193.5	39416.9	11073.1	11030.2	13226	15961.7	16516.6	25990	11328.7	13585.5	16300.1	12525.5	6885.21	9127.26	35909.2	5000.28	22129.4
met_4085	531.368	9.089	30.099	235.52	(2E,6E,10R,11S)-10,11-epoxy-3,7,11-trimethyltrideca-2,6-dienoic acid, [2M-H]1-; (9R,13R)-1a,1b-dinor-10,11-dihydro-12-oxo-15-phytoenoic acid, [2M-H]1-; 10,11-epoxy-3,7,11-trimethyl-2E,6E-tridecadienoic acid, [2M-H]1-; Tetranor-12R-HETE, [2M-H]1-	Unknown	9504.25	11046	6782.29	8055.1	8903.31	8519.91	8211.68	10829.6	9115.5	10218.2	4393.34	6674.36	48453.3	30942.1	44800	15284.6	6958.52	12522.9	15268.8	11069.9	17627.8	13175.1	9972.53	15566.7	20860.7	20493.7	12717	12299	8782.77	10096	6554.56	8735.03	8358.98	6664.32	8562.13	7057.6
met_1577	409.18	9.09	24.961	196.39	Unknown	Unknown	40560.3	32454.5	27201.1	45615.3	50734	40785.3	22896.2	22319.6	21721.9	21776.9	21409	19714.5	71403.3	63885.3	71758.3	55154.8	61120.6	56295.2	42593.4	41530.4	44027.4	48670.7	38282.1	43646.2	53331.5	57288.3	49929.3	65432.5	72106.3	74254.6	35047.5	34007.6	30598.2	26635.2	36838.5	27339.7
met_1750	221.191	9.09	20.235	163.07	3S,7,11-Trimethyl-6E,10-dodecadienal, [M-H]1-; 9E,11Z-Pentadecadienal, [M-H]1-; 5,10-pentadecadienal, [M-H]1-; 2,4-pentadecadienal, [M-H]1-	Unknown	28143.1	36267.4	23720.2	10123.2	8959.53	19824	20712.3	15136.3	20502.3	15140.3	17089.4	21819.9	66812.6	45911.3	61640.1	5084.82	26549.8	28565.8	40952.1	40126	43004	40080.2	28697.6	39968.5	45408	52305.2	41529	31560.4	29499.3	33166.3	27953.8	30977	31484.5	23259.9	30111.2	32800.6
met_1757	429.186	9.09	25.442	199.93	12-oxo-Resolvin E1, [M-H+CH3COONa]1-; 18-oxo-Resolvin E1, [M-H+CH3COONa]1-; Eunicea sesquiterpenoid 7, [M-H+CH3COONa]1-	Unknown	25803.7	31786.7	29765.3	35863.7	39744.6	32883.1	24235.1	16017.9	24099.5	17881	22032.9	21942.7	66858	51816.2	54151.1	52708.3	49082.9	47280	40499.6	40134.3	36166.6	34998.5	34633.8	36807.5	40038	44720.1	42927.1	53855.7	58540.7	60649.6	29504	33886.9	30047.3	24891.5	38080.9	29503.4
met_195	265.18	9.09	20.291	161.99	(2E,6E,10R,11S)-10,11-epoxy-3,7,11-trimethyltrideca-2,6-dienoic acid, [M-H]1-; (9R,13R)-1a,1b-dinor-10,11-dihydro-12-oxo-15-phytoenoic acid, [M-H]1-; 10,11-epoxy-3,7,11-trimethyl-2E,6E-tridecadienoic acid, [M-H]1-; Tetranor-12R-HETE, [M-H]1-	Unknown	327246	353015	349634	14747	19491.3	22467	248581	208962	231093	178168	226785	224024	757528	646602	718917	49939	44932.6	41462.7	453550	447072	483623	454798	406679	447324	479372	554265	526969	24215.1	24339.2	27644	329388	378106	339092	277966	375832	335632
met_2374	434.139	9.09	24.83	194.99	Unknown	Unknown	22306.5	22234.1	18820.3	16994.4	12878	17703.5	13451.6	11315.2	11322.6	9409.31	13700.8	16100.7	45288.6	40274.2	48526.1	13420.4	30472.8	2619.17	30344.8	26667.2	30221.9	25641.9	19391.1	21813.8	25312.6	34521.7	35487.2	20188.1	18154.4	20270	20376.8	24603.1	18865.7	20033.6	22039	21243.5
met_245	347.183	9.09	23.277	184.04	(2E,6E,10R,11S)-10,11-epoxy-3,7,11-trimethyltrideca-2,6-dienoic acid, [M-H+CH3COONa]1-; (9R,13R)-1a,1b-dinor-10,11-dihydro-12-oxo-15-phytoenoic acid, [M-H+CH3COONa]1-; 10,11-epoxy-3,7,11-trimethyl-2E,6E-tridecadienoic acid, [M-H+CH3COONa]1-; 12-oxo-Resolvin E1, [M-H]1-; 18-oxo-Resolvin E1, [M-H]1-; Eunicea sesquiterpenoid 7, [M-H]1-; Tetranor-12R-HETE, [M-H+CH3COONa]1-	Unknown	271806	279093	274807	90021.9	92446.3	98930.4	205060	160089	185715	154235	181837	195038	600797	488797	565644	45137.9	33296.4	32617.2	358961	345078	367084	352467	330850	355299	380926	429386	427831	140510	154382	163689	272968	298330	273648	213156	289497	256955
met_2832	381.12	9.09	24.472	192.96	Unknown	Unknown	19728.9	14482.4	19736.4	23362.3	17611.8	16605.4	11364.9	15687.7	8268.66	11586.1	9271.01	11038.7	27979.6	28642.6	39887.2	2832.95	18903	11905.1	20916.4	22624.5	25363.7	24582.7	19687.5	22210.2	21191.8	20677.2	30564.3	28722.8	19206.6	10593.1	16547	16687.6	12911.8	20712.3	15631.5	23345.4
met_365	438.134	9.09	25.095	197.04	Unknown	Unknown	184526	200558	178113	117235	97534.3	120800	115544	117553	109201	102462	118539	115258	371152	328064	380841	28235.6	73537.6	96734.4	242346	226036	275737	238327	198900	241815	255302	282298	273910	116387	143046	110124	164754	197381	177243	164048	189814	198956
met_4270	423.168	9.09	25.179	197.92	Unknown	Unknown	10989.4	12441.6	9499.37	8896.03	9366.24	8356.1	12020.4	5397.12	8855.79	7183.88	7219.27	8516.31	22422	16464.7	23542.2	15917	10768.3	15487.2	11480.2	14538.2	10012.4	15309.8	13620.4	15204.4	17272.9	18928.1	15668.1	13830.7	14244.7	11633.5	10549.3	12931.3	14541.4	9210.57	9822.95	8350.22
met_5422	323.139	9.09	22.377	177.33	Unknown	Unknown	11799.5	7037.6	8433.78	7591.7	7846.54	6898.36	4362.41	6858.71	8275.32	7187.76	6785.85	6423.86	18607.8	15064.7	17879.6	14157.3	9196.66	8772.91	11810.8	13071.6	13034.1	10768.7	10699.4	12129.9	12491.5	11369.9	13887.4	13429.6	12348	12636.5	8085.64	9927.15	9382.99	7082.47	8491.02	7529.5
met_6910	445.15	9.09	27.047	212.44	Unknown	Unknown	5374.9	3992.9	4443.23	9297.26	7335.83	9698.48	2717.48	3201.17	6549.31	5941.53	6943.33	5431.16	13023.9	13489.6	10886.1	12887.7	7234.16	8954.51	9074.54	8877.43	8693.13	11389.9	7946.98	9114.87	8729.19	10849.8	8795.86	9947.64	11236.5	10516.6	5150.73	5802.77	8691.8	8666.62	8257.88	6282.57
met_864	379.12	9.09	23.449	184.82	Unknown	Unknown	67213.4	70734.3	67757.3	78654.1	497.501	97656.1	46111	42616.8	48400.7	37531.4	47579.9	44208.3	150794	140507	140212	10953.3	10253.9	9180.93	91669.4	82870.5	95384.4	99112.3	83878	91898.6	99885.2	111167	104642	79863.6	103446	106961	64898	75172.5	71789.7	59650.9	77059.3	64754.2
met_2068	520.136	9.091	27.172	212.52	Unknown	Unknown	23421.1	26466.5	26339.2	40851.6	47383.1	36381.8	16487.9	12041.2	15432.8	12013.5	18024	13561	50922.1	41855.2	52813.2	44561.3	50779.2	39780.2	33522.6	28758.8	32578.9	35234.3	29965.8	33197	39152.9	37757.1	37979.1	60413.1	56937.7	62027	22705.9	25066.1	25527.8	20001.4	25103.3	24551.8
met_3475	203.18	9.091	20.205	163.63	7,11-Dimethyl-3-methylene-1,6E,10-dodecatriene, [M-H]1-; 2,6,10-Trimethyl-2,4Z,6Z,10Z-dodecatetraene, [M-H]1-; 7-Ethyl-3,5-dimethyl-2E,4E,6E,8E-undecatetraene, [M-H]1-	Unknown	12339.8	12292.4	13671.9	10028.3	11028.5	13542.6	11655.4	8226.28	8636.67	10027.8	10626.2	8463.34	30006.6	28517	33416	2351.36	15076.5	16120.2	20458.4	11544.3	15353.8	16236.7	15155.4	15593.4	17467.1	20526.3	20095.4	12769.8	11127.6	9404.92	11615.4	15918.9	11949.9	12838.7	14771.8	17453.1
met_4016	436.138	9.091	25.048	196.7	Unknown	Unknown	12792.5	11676.9	6795.72	9585.37	10180.7	9788.31	6504.8	8884.41	8555.93	6527.95	7857.12	8253.07	23985.7	21393.6	28425.5	15881	13023.5	13951.2	16376.2	12793	16573	16752.1	12693.1	16218.1	12011.9	17860.2	20673.4	15722.5	16342.2	14024.7	13602.3	7628.03	12682	11628.6	9404.44	10347
met_2786	461.123	9.092	25.419	199.32	Unknown	Unknown	17179.9	19499	17129.4	21053.6	21907.1	15647.6	14816.1	11483.2	12245.7	7314.86	12222.2	11711.6	35698.1	33470.8	38159.3	23604.3	27444.7	15591.1	19439.5	24945.7	23642.4	24266.1	20498.9	20856.5	22790.4	25079.8	25274.6	23748.8	28561.8	27721.7	19238.5	23044	21238.7	12592.6	20236.5	15028.1
met_3867	367.169	9.092	23.656	186.71	Unknown	Unknown	13493.7	7662.41	14316	12632	12699.4	10721.2	8170.36	4538.85	6670.99	7451.7	6283.46	9185.39	25458.1	23811.7	27254	16446.7	14826.7	12892.4	16928	15968.1	14903.3	16959.9	14859	18954.8	15122.6	20035.8	19557.3	18509.1	15894.2	15688.3	13923.2	12321.1	12647.1	11665.6	11064.2	12530.5
met_4564	238.98	9.122	19.439	155.91	Unknown	Unknown	11184.8	23226.4	10420.8	9931.45	11519.5	14124.8	8780	8905.61	25720	8463.26	10244.5	9317.76	24524.3	15629.6	17088.5	20579.2	10205.4	12073.9	12281.5	10914.6	4191.97	8935.57	10173.3	10179.6	15190.1	9274.36	15914.1	10159.9	8799.49	10061.7	21525.3	10230.2	10012.8	11455.4	12473	13096.9
met_7307	267.195	9.172	21.109	168.55	(1R,2R)-3-oxo-2-pentyl-cyclopentanehexanoic acid, [M-H]1-	Unknown	6821.09	4274.43	8442.34	5433.29	7599.53	8176.16	7603.6	6145.18	8304.11	5750.44	8834.6	8711.35	4496.6	7567.4	3836.8	10996	7096.71	7038.61	8791.52	5785.85	7706.24	7263.41	7814.83	7937.67	8394.99	3542.34	6668.78	5753.1	11182.6	8851.72	11109	9064.87	11668	7025.7	10095.5	8020.79
met_4507	418.936	9.177	22.865	179.56	Unknown	Unknown	15958.7	8301.37	11485.3	10703.8	13878.8	12216	13101.9	11565.9	17051.7	18783.8	14566.2	14374.6	15774	18237	13836.1	16678.1	18988.9	12928.9	15296.8	11783	17792.5	13130.4	14930.9	13548.2	13452.5	23802.7	15950.4	11920.5	8916.55	11543	8474.47	17749.3	20360.8	3479.15	18206	11162.2
met_5298	457.076	9.187	24.799	194.45	Unknown	Unknown	7096.48	2599.04	4449.95	7317.33	5058.39	4951.26	4465.17	8869.33	6420.37	4083.2	6057.43	5138.06	9122.37	5773.44	3270.55	7207.11	4099.75	7112.64	5877.8	8268.31	5802.82	13389.5	9105.63	7775.8	9960.26	7575.64	7203.52	10486.9	5244.71	7036	7151.08	9160.31	3573.07	13617	4737.83	8122.44
met_511	486.031	9.217	25.046	196.06	Unknown	Unknown	136807	101499	75668	72652.7	52781.9	91535.4	65071.3	130956	82107.2	66436.1	97390.5	73418.1	105351	72767.2	100442	39579.6	220194	106008	80171.2	117982	101158	112261	110573	74096.9	63758.8	67385.9	116978	89218.8	77896.1	93128.6	42833.3	85244.6	46242.8	156623	96623.5	61117.8
met_3941	285.206	9.232	20.847	165.92	Hexadecanedioic acid, [M-H]1-; 9-hydroxy-16-oxo-hexadecanoic acid, [M-H]1-; 10-hydroxy-16-oxo-hexadecanoic acid, [M-H]1-	Unknown	10121.7	12023.7	8925.18	10978.5	20772.4	11240.2	13142.5	9084.6	18808	20146.5	9585.4	18067	21871.3	18418	12810	10646.4	12570.5	15881.3	11749.6	12685.1	9322.46	12622	6503.34	13801.3	16017	12212.8	9466.7	15385.5	15554.4	6471.98	11052.3	13960.1	12182.6	17021.9	15394.5	12649.4
met_1632	361.199	9.305	23.551	185.96	Unknown	Unknown	27927.2	26798	25481.4	16645.7	9075.08	11273.8	41232.9	47678.7	42480.9	30939.4	43980.9	45676.1	49564.9	44188.1	46541.9	15684.6	13078.5	15902.9	59728.7	47612.6	54386.3	40563.6	45716.7	49728.8	54244.5	56736.2	57454	13803.7	4606.62	2822.91	87723.1	109931	104866	59479	84225.4	76941.8
met_5357	238.98	9.32	19.455	156.04	Unknown	Unknown	10734.7	6673.32	10211	9464.99	9897.65	15886.4	10388.1	10635.4	6953.43	13118.4	9546.2	10137.8	17889.6	10347.7	10250	14175.4	9472.7	10985.9	7290.18	9638.48	9122.23	10405.8	16008.9	15391.6	11316.4	2480.8	8557.1	9387.49	8570.03	9888.87	8314.78	9249.84	13148.1	10638.8	15392	14171.5
met_274	279.196	9.328	21.435	170.83	12-hydroxy-5,8,10-heptadecatrienoic acid, [M-H]1-; 12S-HHTrE, [M-H]1-; Dihydropanaxacol, [M-H]1-; methyl (2E,6E,10R,11S)-10,11-epoxy-3,7,11-trimethyltrideca-2,6-dienoate, [M-H]1-	Unknown	146845	132234	137426	145517	71162.3	88274.7	287654	358790	306314	299810	327631	329800	230491	196134	217314	114006	72035.3	129220	440601	363037	439901	327623	324334	367510	243090	208703	230453	104907	305733	120779	639367	777335	766728	461442	600517	606559
met_3294	271.191	9.349	20.614	164.43	5-methyl-tetradecanedioic acid, [M-H]1-; 3-methyl-tetradecanedioic acid, [M-H]1-; Pentadecanedioic acid, [M-H]1-	Unknown	13857.6	15823.3	14310.6	8254.14	14777.4	11271.3	20179.5	14955.4	22248.6	20794.1	16180.1	14026.1	17261	16013.1	20694.8	17170.4	24168.7	12834.2	17007.1	15737.6	13913.7	17112.4	25894	22271.8	5376.97	20285.5	14684	21378.9	15252.5	13357.6	12957.2	12050.5	17250.6	12573.1	18348	13985.6
met_8179	311.222	9.381	22.051	174.99	9Z-Octadecenedioic acid, [M-H]1-; alpha-15,16-DiHODE, [M-H]1-; alpha-12,13-DiHODE, [M-H]1-; alpha-9,10-DiHODE, [M-H]1-; 9,14-DiHODE, [M-H]1-; 14-HpODE, [M-H]1-; 12-HpODE, [M-H]1-; 9-hydroxy-13-oxo-10-octadecenoic acid, [M-H]1-; 12-oxo,13-hydroxy-9Z-octadecenoic acid, [M-H]1-; gamma- 12,13-DiHODE, [M-H]1-; 10-oxo-13-hydroxy-11-octadecenoic acid, [M-H]1-; 9,10-epoxy-13-hydroxy-11-octadecenoic acid,…	Unknown	9029.28	4189.47	5928.84	4213.42	5347.31	4777.02	6465.14	5377.99	6650.52	5604.78	4788.47	5182.37	6303.69	7898.56	4685.11	9654.84	3584.3	6778.96	3415.75	6175.31	5491.1	5525.52	6735.26	6800.99	6592.53	3746	4816.43	5901.59	9953.84	2339.7	2905.14	5134.42	5201.62	4289.93	3365.79	4756.88
met_1129	267.196	9.413	21.103	168.49	(1R,2R)-3-oxo-2-pentyl-cyclopentanehexanoic acid, [M-H]1-	Unknown	49015.1	43186	39876.1	21871.1	13608.8	15513.5	52075.6	55871.5	60408.1	64573.4	67907.7	65268.6	81854.1	71310.6	67965.5	13822.3	16893.7	16864.9	68013.7	64569.2	58910.6	71949.6	56418.6	65288.6	91666.5	103469	95863.3	12555.4	21392.7	26005.1	121220	152256	148638	120193	151010	137854
met_527	335.222	9.441	23.477	185.89	(+/-)11,12-Ep-15S-HETrE, [M-H]1-; 10,11-dihydro-12-oxo-LTB4, [M-H]1-; 11,12-DiHETE, [M-H]1-; 11,12-epoxy-8-hydroxyeicosa-5,9,14-trienoic acid, [M-H]1-; 11-HpETE, [M-H]1-; 11-deoxy-PGE2, [M-H]1-; 12S-HpETE, [M-H]1-; 14,15-DiHETE, [M-H]1-; 14,15-Ep-11-HETrE, [M-H]1-; 14,15-HxA3 (11S), [M-H]1-; 14,15-HxB3 (13R), [M-H]1-; 14,15-dihydroxy-5,8,10,12-eicosatetraenoic acid, [M-H]1-; 14-hydroperoxy-5Z,8Z,…	LT-like, [M-H]1-	40928	34463.6	31181.3	78654.1	3435.71	6686.92	89864.7	109232	107829	94517.1	113406	114191	72865.4	64239.2	69948.6	13311.9	21501.1	6714.78	162976	140010	157054	199180	127777	168295	69208.4	80436.7	81736.1	79863.6	10658.4	5302.85	281271	339633	304128	227492	287797	280212
met_748	539.314	9.446	29.424	230.08	Unknown	Unknown	318129	188081	273275	78654.1	89297.1	97656.1	110198	117850	115293	122429	114960	114850	51370.2	143493	199591	102079	100445	97240.8	141025	142363	142498	143568	112104	140749	507673	281359	641215	79863.6	103446	106961	145414	156024	144376	157032	145810	154750
met_3273	291.988	9.456	21.603	171.84	Unknown	Unknown	136689	155509	140098	78654.1	89297.1	10255.9	25054.3	117850	21909.9	27795.7	23962.2	39130.3	200928	21208.6	166492	102079	100445	97240.8	141025	29106	142498	40348.4	54983.3	140749	22631.3	201159	171479	79863.6	7141.68	106961	145414	156024	36531	25478.7	145810	42907.3
met_1589	314.082	9.492	21.379	169.54	Unknown	Unknown	17141	18479.7	10219.9	17669	35268.1	53561.9	7377.99	35540.6	16232.2	61815.8	7295.45	8079.16	14075.7	18395.2	41912.8	71774.7	9409.14	218826	48099.3	9091.41	51265.3	15259.9	5598.93	22239.6	17738.1	26628.7	15077	67115	20434.5	18813.8	15263.1	8518.17	14014.8	59480.1	9849.27	41512
met_5431	345.1	9.492	22.502	177.89	Unknown	Unknown	6962.12	7069.22	7050.56	13020	9653.97	5911.31	5706.68	4909.59	4170.34	5673.53	5798.48	5416.85	12780.8	9145.72	11832.5	29767.5	2998.54	21298.4	14595.3	6564.15	4876.78	6690.88	7256.1	11666.8	9905.78	9716.54	9963.35	12241.4	10365	18554.7	4688.77	9548.83	8897.18	5625.05	7578.57	7361.23
met_5873	347.1	9.492	22.325	176.44	Unknown	Unknown	7084.32	7243.81	3634.29	4702.47	5948.99	7616.23	3449.54	5877.05	7687.2	9974.08	3888.59	9582.29	7696.07	7337.5	8446.8	22238.1	4135.23	26225.8	13526.6	7644.11	7577.81	7538.27	6991.92	6817.97	7252.6	7620.6	9081.84	14904.9	8018.6	12287.8	6746.09	3890.23	4108.35	7954.03	5679.22	8504.67
met_1604	404.113	9.495	24.174	190.21	Unknown	Unknown	14158.8	4789.44	17641.5	41516.3	29040.3	22636.7	16870.1	16580	10053.4	35060	18558.9	16105.8	35356	9997.81	33923.6	88543.2	25899.5	79472.6	47631.9	18731.7	40041.3	31603.6	22282.5	38765.7	19118.7	9882.07	12173.4	45690.5	33699.9	63857.6	31931.6	19768.2	38543	34434	25972.9	30451.3
met_1133	279.196	9.523	23.164	184.77	12-hydroxy-5,8,10-heptadecatrienoic acid, [M-H]1-; 12S-HHTrE, [M-H]1-; Dihydropanaxacol, [M-H]1-; methyl (2E,6E,10R,11S)-10,11-epoxy-3,7,11-trimethyltrideca-2,6-dienoate, [M-H]1-	Unknown	136689	155509	140098	78654.1	89297.1	97656.1	52662	117850	85184.6	37648.6	114960	97048.8	1031.09	174561	166492	102079	100445	97240.8	38791.7	109430	80018.9	149825	78298	137760	172799	201159	171479	79863.6	103446	106961	129954	176571	3755.23	157032	163749	131781
met_2180	361.198	9.524	26.326	208.14	12-hydroxy-5,8,10-heptadecatrienoic acid, [M-H+CH3COONa]1-; 12S-HHTrE, [M-H+CH3COONa]1-; Dihydropanaxacol, [M-H+CH3COONa]1-; methyl (2E,6E,10R,11S)-10,11-epoxy-3,7,11-trimethyltrideca-2,6-dienoate, [M-H+CH3COONa]1-	Unknown	136689	155509	140098	78654.1	89297.1	97656.1	42929.4	34459.8	45430.1	38268	46164.4	50517.6	200928	174561	166492	102079	100445	97240.8	47260.4	43288	43641.9	28421.7	37456.8	46991.5	172799	201159	171479	79863.6	103446	106961	45812.8	5288.01	29300.4	36124.7	22304.2	47533.9
met_502	217.196	9.524	21.283	171.79	2,6,10-Trimethyl-(E,E)-2,6,10,12-tridecatetraene, [M-H]1-; 7-Ethyl-3,11-dimethyldodeca-1,3,6,10-tetraene, [M-H]1-	Unknown	174748	181702	158516	130037	120741	118916	139877	170460	166925	171665	195883	180798	243386	220913	190399	161511	147167	136314	208373	199261	198048	269903	188567	217332	236987	230190	245873	175851	198060	214651	313766	343544	340608	283506	331318	3718.41
met_885	443.202	9.526	26.365	207.06	Unknown	Unknown	136689	155509	140098	78654.1	89297.1	97656.1	113111	108047	116454	102686	136509	138324	200928	174561	166492	102079	100445	97240.8	115800	123969	110930	135919	134014	128103	172799	201159	171479	79863.6	103446	106961	134090	10531.5	146838	115090	91683.9	130100
met_1130	395.136	9.527	25.61	201.79	Unknown	Unknown	136689	155509	140098	78654.1	89297.1	97656.1	64770.5	109607	73552.3	110627	81355.2	69171.4	200928	174561	166492	102079	100445	97240.8	94755.8	85291.6	110987	99649.5	84468.3	90866.4	172799	201159	171479	79863.6	103446	106961	110037	51070.1	60007	132531	91539.4	7277.21
met_4913	344.107	9.53	23.254	183.95	Unknown	Unknown	136689	155509	140098	78654.1	89297.1	97656.1	110198	13797.4	115293	27903.6	5259.42	114850	200928	174561	166492	102079	100445	97240.8	17002.8	9763.13	18228.4	10606.2	112104	7122.88	172799	201159	171479	79863.6	103446	106961	16808.3	10208.7	9574.51	56050.3	8430.62	30782.8
met_6625	825.256	9.531	34.656	269.05	Unknown	Unknown	136689	155509	140098	78654.1	89297.1	97656.1	6358.51	117850	10134	122429	14326.4	10613.9	200928	174561	166492	102079	100445	97240.8	14215.5	14405.4	16205.5	14086.3	15938.6	140749	172799	201159	171479	79863.6	103446	106961	5958.08	9792.84	13604.4	6192.44	145810	15844.4
met_1545	261.186	9.532	22.597	180.77	Ginsenoyne D, [M-H]1-; 1-Heptadecene-4,6-diyne-3,9-diol, [M-H]1-; 14:4(2E,4E,8E,10E)(6Me[S],9Me,12Me[S]), [M-H]1-; 7,10-heptadecadiynoic acid, [M-H]1-; 6,9-heptadecadiynoic acid, [M-H]1-; 5,8-heptadecadiynoic acid, [M-H]1-; 10E,16-heptadecadien-8-ynoic acid, [M-H]1-	Unknown	30735.7	36647.4	30254.4	18232.1	14593.3	16103.5	45790.6	38082	49834.7	49637.4	50619.2	36167.2	51789.6	48770.9	44853	22708.3	16523.6	20030.6	73298.2	37362.9	63371.9	55068.2	63643.5	53029.4	58569.1	55525.1	59696.1	26894.2	34380.9	36666.2	98431.2	84158	100298	65844.2	92103.7	75113.7
met_5060	371.089	9.532	23.244	183.34	Unknown	Unknown	136689	155509	140098	78654.1	89297.1	97656.1	12429	8372.42	16015.1	15275.8	14943.3	15534.8	200928	174561	166492	102079	100445	97240.8	15030.6	6269.31	14948.8	18981.2	15798.2	140749	172799	201159	171479	79863.6	103446	106961	19009.4	21711.2	11904.4	11018.5	23102.5	18873.5
met_6725	415.059	9.532	24.145	189.81	Unknown	Unknown	136689	155509	140098	78654.1	89297.1	97656.1	4766.86	9521.53	4377.71	9378.24	10126.4	3552.08	200928	174561	166492	102079	100445	97240.8	10810.9	8057.54	142498	11297.1	3967.49	9234.5	172799	201159	171479	79863.6	103446	106961	13803.3	13051.7	12494.1	13450.3	14215.6	21962.7
met_1303	364.173	9.533	24.061	189.97	Unknown	Unknown	52031.9	49865.7	46631.4	20129.3	12097.5	14100.3	56848.6	42071.5	56879.4	35716.1	68571.7	70827.1	88524	78566.8	70322.6	14443.1	15622	16544.3	62926.7	64136.6	46307	92538	66172.2	77839.7	82572	91936	82377	16555.1	20266.6	35420.9	95566.7	124121	127480	54983.3	123732	86133.9
met_135	612.311	9.533	31.299	244.16	Unknown	Unknown	470407	453364	420164	315117	288855	219870	463609	671554	646130	682225	763824	710930	777855	705814	719404	376866	218594	373364	830780	767227	784891	1124203	716149	950960	886730	910218	924985	270927	297066	333548	1255900	1386176	1292217	1154644	1288347	1442073
met_1450	612.311	9.533	33.323	260.1	Unknown	Unknown	29366.6	29318.2	28152.3	16645.7	9075.08	11273.8	30838.5	49499.2	51059.6	36804.3	55523.4	46767.7	66899.3	46205.8	41099.8	15684.6	13078.5	15902.9	57392.5	54689.2	51936	79642.5	57844.2	59304.3	53654.2	56087.6	52899.5	13803.7	18014.3	30095.6	89917.9	101908	91132	74892.1	90794.1	101622
met_1570	559.399	9.533	31.361	245.17	12-hydroxy-5,8,10-heptadecatrienoic acid, [2M-H]1-; 12S-HHTrE, [2M-H]1-; Dihydropanaxacol, [2M-H]1-; methyl (2E,6E,10R,11S)-10,11-epoxy-3,7,11-trimethyltrideca-2,6-dienoate, [2M-H]1-	Unknown	32301.7	32349.5	28828.1	18232.1	14593.3	16103.5	26194.2	34550.4	39239.6	33122.2	44345.3	47355.2	57035.5	51902.2	38444.7	22708.3	16523.6	20030.6	43295.3	46778.6	42815.2	71315.2	45240.6	50346.3	54968.4	53163.2	61252.4	26894.2	34380.9	36666.2	83625.4	101081	102472	68846.2	106281	91619.7
met_1702	610.315	9.533	31.288	244.11	Unknown	Unknown	136689	155509	140098	78654.1	89297.1	97656.1	24247.8	40467.9	19672.7	34803.2	40037.7	41649	200928	174561	166492	102079	100445	97240.8	54675.9	50879.6	42863.2	65470.2	40697.5	47960.3	172799	201159	171479	79863.6	103446	106961	75227.9	90878.2	71589.4	71609.3	74039.7	93541.4
met_1706	657.367	9.533	33.263	259.24	Unknown	Unknown	24002.2	23525.2	21305.1	16149.5	18104.4	14606.1	35410.4	36975.6	39422.3	32089.6	51761.5	44915.7	38749.6	37296.2	38083.5	22309.5	22129	22627.3	47590.7	51141.9	41541.7	70906.3	36579.6	48388.5	42803	46027.9	46581.2	14978.8	20737.7	22211.6	71823.9	76651	76371.6	54390.1	82041.8	67367.3
met_1859	675.34	9.533	32.753	255.1	Unknown	Unknown	136689	155509	140098	78654.1	89297.1	97656.1	21892.7	44801.4	35822.8	45414.7	34995.5	37120.1	200928	174561	166492	102079	100445	97240.8	46372.6	43628.6	51267.2	55479.2	30777.3	41102.9	172799	201159	171479	79863.6	103446	106961	70649.4	61314.5	56886.6	71670.5	49718.5	70330.5
met_2775	461.274	9.533	27.091	212.57	Unknown	Unknown	136689	155509	140098	78654.1	89297.1	97656.1	25965.5	19076	25195.9	21106	28541.9	30200.5	200928	174561	166492	102079	100445	97240.8	27848	31585.2	20269	33234.9	30708.5	32485.2	172799	201159	171479	79863.6	103446	106961	34030.6	44984.1	40854.3	24451.3	43389	35366.1
met_2784	524.08	9.533	27.014	211.23	Unknown	Unknown	28068.9	29674.3	29359.2	29455.1	31325.9	21995.1	28397	28454.8	28280.3	29456.5	29560	23516.3	31254.9	28997.3	27914.6	24648	25794.7	23558.4	28441.7	18239.9	30120.7	33568.8	34211.7	30744.5	30497.8	26526.3	29356.4	27626.3	25361.2	32115.6	34815.1	36594.1	35065.4	30924.7	12030.7	36370.7
met_3737	730.279	9.533	33.732	262.39	Unknown	Unknown	136689	155509	140098	78654.1	89297.1	97656.1	18252.9	6825.01	27608.3	16781.7	18846.9	22631.6	200928	174561	166492	102079	100445	97240.8	28420	17456.7	16001.1	26889.2	112104	25706.2	172799	201159	171479	79863.6	103446	106961	29354.7	34958.3	29284.6	157032	32411.5	31902.3
met_4169	301.177	9.533	25.086	199.64	Unknown	Unknown	13917.3	15316.5	12353	8986.85	11393.3	9749.3	11335.5	9625.79	17417.2	7007.3	17996.1	21785.2	18413.1	16229.4	14957	8998.19	11820.4	8689.05	20265.2	18302.8	14563	19976.2	19295.2	16610.5	18932.9	21273.4	17355.4	9508.05	12584.7	9471.15	23605.4	29310	32577.4	16760.6	26357.9	18171
met_4273	776.316	9.533	34.801	270.48	Unknown	Unknown	136689	155509	140098	78654.1	89297.1	97656.1	15035.9	10976.1	16157.1	9673.86	20135.3	19086	200928	174561	166492	102079	100445	97240.8	18285.9	15981.1	16345.1	21474.5	16311.2	16393.3	172799	201159	171479	79863.6	103446	106961	21318.3	14488.9	26775.2	16682.4	25070.8	22685.4
met_76	279.196	9.533	31.132	249.1	12-hydroxy-5,8,10-heptadecatrienoic acid, [M-H]1-; 12S-HHTrE, [M-H]1-; Dihydropanaxacol, [M-H]1-; methyl (2E,6E,10R,11S)-10,11-epoxy-3,7,11-trimethyltrideca-2,6-dienoate, [M-H]1-	Unknown	1.10459e+06	1.0444e+06	1.0744e+06	517318	556798	418020	812557	979511	1071466	917366	1217349	1256224	975102	680928	693079	852643	564803	730769	1267724	1239021	1153824	1794996	1190117	1476463	1.39342e+06	1.41414e+06	1.16595e+06	660659	594714	708722	2131416	2632303	2481546	1773184	2530982	2245504
met_8048	280.199	9.533	22.923	182.81	Unknown	Unknown	136689	155509	140098	78654.1	89297.1	97656.1	110198	14176.2	9193.18	122429	9399.18	4192.89	200928	174561	166492	102079	100445	97240.8	13821.7	7382.16	3047.27	143568	6133.86	6855.13	172799	201159	171479	79863.6	103446	106961	145414	14487.5	21500.1	17508.5	145810	3123.09
met_8066	611.469	9.533	32.468	253.37	Unknown	Unknown	136689	155509	140098	78654.1	89297.1	97656.1	7597.25	4074.2	4010.52	122429	7549.95	8649.16	200928	174561	166492	102079	100445	97240.8	6068.21	4777.02	142498	9638.2	6767.67	4445.74	172799	201159	171479	79863.6	103446	106961	6953.41	11599.5	13912.8	7521.19	10705.2	10475.8
met_96	581.381	9.533	31.408	245.3	12-hydroxy-5,8,10-heptadecatrienoic acid, [2M-2H+Na]1-; 12S-HHTrE, [2M-2H+Na]1-; Dihydropanaxacol, [2M-2H+Na]1-; methyl (2E,6E,10R,11S)-10,11-epoxy-3,7,11-trimethyltrideca-2,6-dienoate, [2M-2H+Na]1-	Unknown	715306	676555	648599	330270	297803	202731	604542	711649	828691	693523	972733	1015654	1167331	782524	777945	400299	258590	366340	1046517	970453	917936	1504164	918343	1193269	1.12895e+06	1.4083e+06	1.02025e+06	205592	231098	336943	1793023	2191968	2080415	1342195	2057402	1951040
met_1123	694.314	9.534	33.358	259.71	Unknown	Unknown	136689	155509	140098	78654.1	89297.1	97656.1	52962.8	60801.8	72851.4	59152.2	85115.2	65111.5	200928	174561	166492	102079	100445	97240.8	80072.4	72041.5	71341.3	111049	73865.1	89648.3	172799	201159	171479	79863.6	103446	106961	123387	123580	130288	99572.5	114563	128739
met_1188	437.185	9.534	26.106	205.07	Unknown	Unknown	67006.8	64086.8	58180.4	42747.9	36771.3	41206.6	74783.8	67269	80070.3	65106.2	76075.2	74439.1	79337.3	72484.2	74139.7	46353.9	39958	45040	77258.1	73467.8	74672.3	91566.2	72886.1	82792.7	85705	95558.8	82183	51954.9	49307.3	57279.4	86893.4	99474.8	91696.7	66153.6	87149.8	78421
met_1190	337.154	9.534	23.355	184.86	Unknown	Unknown	57237.6	54116.6	49049.8	21871.1	13608.8	15513.5	54323.2	61711.7	61642.1	60496.8	71434.2	72627.9	94037.6	84596.5	73669.1	13822.3	16893.7	16864.9	70912.9	77511.8	70047.3	89630.1	66768.8	78605.6	87417.2	99002.9	87232.2	17930.9	21392.7	38083.6	98457.4	114913	109487	87733.4	111255	109696
met_1282	663.384	9.534	33.746	262.98	Unknown	Unknown	53797.6	50088.5	46630.3	20129.3	12097.5	14100.3	54829.3	48217.1	64784.4	47399.4	72982.3	73072.4	92157.2	76714.6	71963.7	14443.1	15622	16544.3	68635.7	72112.1	55732.7	84687.7	69252.4	82013.7	79524.3	89769.6	75818.2	16555.1	20266.6	35420.9	96548.3	105773	106278	69081.4	102198	86988.1
met_1329	235.206	9.534	21.38	171.83	10,12-hexadecadienal, [M-H]1-; 11,13-hexadecadienal, [M-H]1-; 11-Hexadecynal, [M-H]1-; 13Z-Hexadecen-11-yn-1-ol, [M-H]1-; 4E,6E,10Z-Hexadecatrien-1-ol, [M-H]1-; 4E,6Z-Hexadecadienal, [M-H]1-; 6,11-hexadecadienal, [M-H]1-; 7Z,11E-Hexadecadienal, [M-H]1-; 8E,11Z-Hexadecadienal, [M-H]1-; 9E,11E-Hexadecadienal, [M-H]1-	Unknown	36451.5	36602.2	35370.4	18909.2	10569.1	12681.2	47462.8	58806.1	51463.5	49814.8	64286	55397.6	83214.4	58413.3	55782.1	15450.1	12697.6	15734	65291.2	61276.4	61784.6	78356.7	57950.8	64040.8	65475.9	69786.5	63670.9	14123.6	19388	32621.8	92746.9	103922	99107	89174.7	100144	105606
met_1636	399.151	9.534	24.841	195.58	Unknown	Unknown	41150.8	37253.3	34493	21964.4	20370.9	17332.9	52006.9	38066.7	48949.9	36729.6	57031.9	55932.7	49415.4	46958.9	48313.3	22200.4	20689.4	24592.5	46822	47612.2	53440.3	51396.5	46342.2	49582	49407.6	57577.5	54091.3	20196.9	22184.9	27129.5	70802.9	81339.4	80102.1	44799.3	70367.2	72869.6
met_1871	279.196	9.534	32.327	258.76	12-hydroxy-5,8,10-heptadecatrienoic acid, [M-H]1-; 12S-HHTrE, [M-H]1-; Dihydropanaxacol, [M-H]1-; methyl (2E,6E,10R,11S)-10,11-epoxy-3,7,11-trimethyltrideca-2,6-dienoate, [M-H]1-	Unknown	46002.3	43414.6	44581.1	38642.6	36253.7	42502.8	57650.5	37179.6	28575.5	33055.9	40800.9	34329.4	56127.8	52105.4	49907.6	51814.3	46493.5	43107.3	34230.6	41872.7	39174.1	52494	44250.8	55551.6	49674	51710.5	51322.6	59195.5	56179.1	51043.8	56873.8	55208.5	42001.2	38982.9	58640.9	52723.1
met_2233	615.318	9.534	32.728	255.4	Unknown	Unknown	136689	155509	140098	78654.1	89297.1	97656.1	19015.2	35377.7	22531.2	36843.8	32038.8	27288.4	200928	174561	166492	102079	100445	97240.8	38179.6	36653.5	37665.3	43672.8	29528.6	35642.4	172799	201159	171479	79863.6	103446	106961	52708.4	49022.6	43422.4	55363.1	43234.3	62731.9
met_2381	397.132	9.534	25.622	201.85	Unknown	Unknown	136689	155509	140098	78654.1	89297.1	97656.1	26256.1	47142.8	31108.8	40130.1	30941.1	26763	200928	174561	166492	102079	100445	97240.8	43987	35247.3	47934.6	39912.3	33137.3	36077.5	172799	201159	171479	79863.6	103446	106961	46651.7	156024	39726.7	46316.3	24481.5	41006.7
met_2475	597.355	9.534	31.873	248.83	Unknown	Unknown	136689	155509	140098	78654.1	89297.1	97656.1	17118.5	19124.9	25137.3	18837.7	26574.8	33240.9	200928	174561	166492	102079	100445	97240.8	31741.1	28491	24138.3	41927.5	23974.6	32544.7	172799	201159	171479	79863.6	103446	106961	45981.3	65434.6	60999.4	35752.2	59299.7	55163.2
met_2589	427.176	9.534	25.953	204.01	Unknown	Unknown	25664.9	27879	27527	27239	22828.2	21629.2	25930.5	20689.7	27850.3	21187.2	28938.8	32716.3	37842.8	32796	32638	33140.3	27090.7	23723.2	26035	33274.5	28122.6	38151.2	27310	35175.9	38679.9	37649.2	34614.2	34174	41396.5	42966.6	41140.7	43213.8	48852.4	27626.3	48750.1	36834.8
met_2607	301.178	9.534	22.421	178.19	Unknown	Unknown	25149.9	26854.3	24577.3	17185.4	17475.6	16627.2	21274.2	17361.3	28693.8	20297.5	28898.1	27834.8	42592.8	34223.2	30432.4	29004.1	20736.4	21538.5	26044.1	32355.7	21605.8	44083.1	25219.6	32424.5	40365.3	42257.8	36809.5	32061.4	38400.6	39204.5	44600.3	47793.6	46706.9	29474.1	47577.4	42215.1
met_2688	425.086	9.534	24.28	190.74	Unknown	Unknown	24533.8	22938.8	28117.5	22671.1	17853.1	11377.6	16783.8	31152.4	19681.7	27796.6	24851.7	18076.8	36019.7	30323.5	34846.8	22888.4	19781.7	19592.2	37761.2	23082.3	32246.2	34933.4	21539.5	27085.9	38981.7	38561.7	41766	22703.9	23166.5	24706.3	40873.7	36696.6	36527.2	39957	38307.8	48206.7
met_2701	419.112	9.534	25.091	197.28	9,10,12,13-tetrachloro-octadecanoic acid, [M-H]1-	Unknown	136689	155509	140098	78654.1	89297.1	97656.1	13977.7	50091.8	16140.1	46905.5	114960	18082.1	200928	174561	166492	102079	100445	97240.8	40765.6	24856.1	49581.7	143568	112104	140749	172799	201159	171479	79863.6	103446	106961	48422.6	28267.5	27531.6	68696.8	26031.9	94522.3
met_282	393.136	9.534	24.309	191.44	Unknown	Unknown	151549	130168	127276	131066	5607	4996.64	314227	331728	367140	326031	390118	361832	4869.23	3811.69	3385.31	103694	8180.35	132789	367582	370014	360172	443308	391360	387201	207502	169221	209553	2334.04	252162	4082.2	443826	482145	442127	364771	470608	434745
met_2993	635.299	9.534	33.305	259.76	Unknown	Unknown	136689	155509	140098	78654.1	89297.1	97656.1	15922.4	17878.8	27438.5	16009.9	26768.1	28436.7	200928	174561	166492	102079	100445	97240.8	26959.5	25610.9	20283.1	33797.8	36614.3	25025.9	172799	201159	171479	79863.6	103446	106961	29015.3	54875.8	30127.8	25749.4	37204.3	28176.2
met_3100	415.17	9.534	25.021	196.78	Unknown	Unknown	136689	155509	140098	78654.1	89297.1	97656.1	14735.6	21323.5	15012.1	21482.5	20563	20976.5	200928	174561	166492	102079	100445	97240.8	24698	17776.7	25014	27703.5	23132	24931.8	172799	201159	171479	79863.6	103446	106961	35593.6	32655.6	37934.1	35255.9	32275.1	48572.2
met_3227	679.345	9.534	33.367	259.89	Unknown	Unknown	136689	155509	140098	78654.1	89297.1	97656.1	110198	10247.2	13360.6	9793.16	23431	16469	200928	174561	166492	102079	100445	97240.8	16282.7	26380.4	142498	41236.9	25945.5	42077.8	172799	201159	171479	79863.6	103446	106961	49053.6	48972.1	38575.3	23884.7	50033	41823.7
met_3278	279.196	9.534	26.941	215.28	12-hydroxy-5,8,10-heptadecatrienoic acid, [M-H]1-; 12S-HHTrE, [M-H]1-; Dihydropanaxacol, [M-H]1-; methyl (2E,6E,10R,11S)-10,11-epoxy-3,7,11-trimethyltrideca-2,6-dienoate, [M-H]1-	Unknown	19550.5	17927.4	19741.6	19474.3	18930.9	16788.3	18728.2	24826.1	19041.7	24187	15461.5	20368.3	29462.7	23987.8	25629.4	20043.1	17438.9	14893.5	24241.6	23714.3	23573.2	37280.8	30117.5	23951	27948.4	25776.4	21929.9	17667.7	25318.9	24996.4	23261.8	28579.1	49233.3	7591.81	36283.2	29725.9
met_3591	677.337	9.534	32.743	255	Unknown	Unknown	136689	155509	140098	78654.1	89297.1	97656.1	12843.3	22795.5	17273.7	25289.6	18246.9	23388	200928	174561	166492	102079	100445	97240.8	22236.5	142363	27446.8	28936.8	21037	24748.2	172799	201159	171479	79863.6	103446	106961	32158.6	28167.6	26014.1	38856.8	28320.2	154750
met_3612	339.152	9.534	23.354	184.82	Unknown	Unknown	136689	155509	140098	78654.1	89297.1	97656.1	19225.9	26505.5	18969.9	22807.6	28715.5	114850	200928	174561	166492	102079	100445	97240.8	141025	26240.3	24009.1	29296	22043.8	27304.5	172799	201159	171479	79863.6	103446	106961	35559.9	46719.9	35509.4	26964.7	145810	154750
met_3750	423.085	9.534	24.292	190.87	Unknown	Unknown	136689	155509	140098	78654.1	89297.1	97656.1	8951.77	19584.4	11619.5	17246.6	16962.8	15715.8	200928	174561	166492	102079	100445	97240.8	21065	17938.3	22151	17004.6	14190	22670.9	172799	201159	171479	79863.6	103446	106961	28536.2	26718.6	25469.5	32192.8	24238.8	33985.1
met_4019	404.061	9.534	23.98	188.67	Unknown	Unknown	136689	155509	140098	78654.1	89297.1	97656.1	110198	20204.9	8261.89	20548.4	12974.5	11537.5	200928	174561	166492	102079	100445	97240.8	11180.2	13926.4	21551.4	22249.1	12563.6	16665.4	172799	201159	171479	79863.6	103446	106961	25253.8	24658.1	22412.4	36095.8	23831.7	41686.4
met_4257	617.316	9.534	32.723	255.34	Unknown	Unknown	136689	155509	140098	78654.1	89297.1	97656.1	8981.43	19215.7	12316.2	15852	7909.68	13828.2	200928	174561	166492	102079	100445	97240.8	20354	18123.4	17678.6	22463.6	13678.9	17410.6	172799	201159	171479	79863.6	103446	106961	22711	22563.5	22679.4	28939.8	23485.6	19651.8
met_5050	525.204	9.534	28.675	224.34	Unknown	Unknown	136689	155509	140098	78654.1	89297.1	97656.1	21811.7	117850	21223.4	10971.6	18590.2	27351.7	200928	174561	166492	102079	100445	97240.8	13547.3	10414	4615.55	21069.6	22009.6	20749.7	172799	201159	171479	79863.6	103446	106961	10441.4	156024	11969.5	3227.33	15805.9	12079.2
met_5533	424.087	9.534	24.282	190.78	Unknown	Unknown	136689	155509	140098	78654.1	89297.1	97656.1	7743.34	11917.9	6419.96	122429	12864.9	7003.24	200928	174561	166492	102079	100445	97240.8	12866.3	12648.3	20252	14620	7591.1	11381.2	172799	201159	171479	79863.6	103446	106961	19556.4	15813.8	144376	19799.1	17610.8	22261.8
met_569	261.186	9.534	24.124	193.13	Ginsenoyne D, [M-H]1-; 1-Heptadecene-4,6-diyne-3,9-diol, [M-H]1-; 14:4(2E,4E,8E,10E)(6Me[S],9Me,12Me[S]), [M-H]1-; 7,10-heptadecadiynoic acid, [M-H]1-; 6,9-heptadecadiynoic acid, [M-H]1-; 5,8-heptadecadiynoic acid, [M-H]1-; 10E,16-heptadecadien-8-ynoic acid, [M-H]1-	Unknown	122560	124868	133884	109057	108209	106187	138501	143931	149631	112326	212953	163510	176972	159069	145737	108474	45459.4	89444.4	205676	165590	131097	204659	116664	216308	149956	159062	194970	178809	145216	142372	303530	300326	224097	216888	272060	272295
met_57	279.196	9.534	24.054	191.97	12-hydroxy-5,8,10-heptadecatrienoic acid, [M-H]1-; 12S-HHTrE, [M-H]1-; Dihydropanaxacol, [M-H]1-; methyl (2E,6E,10R,11S)-10,11-epoxy-3,7,11-trimethyltrideca-2,6-dienoate, [M-H]1-	Unknown	345325	534208	317016	11165.1	13590.4	17945.3	1234848	1511649	1435437	1396300	1728892	1608022	14733.5	9350.65	14148.1	9002.2	23355.4	10198.5	1707763	1623983	1545075	2016141	1626981	1770851	712867	8696.89	619277	203952	11387.5	14224	2227306	2515159	2634280	2078646	2503865	2350356
met_61	361.199	9.534	24.266	191.67	12-hydroxy-5,8,10-heptadecatrienoic acid, [M-H+CH3COONa]1-; 12S-HHTrE, [M-H+CH3COONa]1-; Dihydropanaxacol, [M-H+CH3COONa]1-; methyl (2E,6E,10R,11S)-10,11-epoxy-3,7,11-trimethyltrideca-2,6-dienoate, [M-H+CH3COONa]1-	Unknown	345325	534208	317016	20855	22374.6	26822.9	1443458	1448195	1556424	1401094	1696616	1651021	24005.8	16121.8	21395.9	13519.1	29635.5	13755.5	1663303	1648981	1587023	1856386	1634364	1774169	712867	643561	619277	19117	17280.2	23003.5	2025026	2129753	2102930	1727559	2081431	1996225
met_614	379.121	9.534	23.859	188.11	Unknown	Unknown	139631	82075.2	136391	99472.1	102232	3485.74	40051.1	313321	28158.7	297144	50056.8	48132.2	106245	150053	165728	150328	104233	158923	172955	76812.5	290778	101635	43705.3	80808.6	128491	90932.5	137574	148535	119482	127355	176281	80113.9	94551.6	617934	74054.9	404391
met_7580	235.206	9.534	24.038	193.48	10,12-hexadecadienal, [M-H]1-; 11,13-hexadecadienal, [M-H]1-; 11-Hexadecynal, [M-H]1-; 13Z-Hexadecen-11-yn-1-ol, [M-H]1-; 4E,6E,10Z-Hexadecatrien-1-ol, [M-H]1-; 4E,6Z-Hexadecadienal, [M-H]1-; 6,11-hexadecadienal, [M-H]1-; 7Z,11E-Hexadecadienal, [M-H]1-; 8E,11Z-Hexadecadienal, [M-H]1-; 9E,11E-Hexadecadienal, [M-H]1-	Unknown	136689	155509	140098	78654.1	89297.1	97656.1	5991.27	6985.53	4522.99	6505.29	114960	8495.13	200928	174561	166492	102079	100445	97240.8	8515.02	6862.98	7301.21	143568	8331.19	8917.02	172799	201159	171479	79863.6	103446	106961	12152.8	10234.1	10533.5	10693.3	11571.9	14230.9
met_784	534.152	9.534	27.973	218.68	Unknown	Unknown	51036.7	50877.1	60705.3	78654.1	50903.1	6278.98	97363.9	121783	118306	112770	132714	123752	72148.4	39635.8	75924.6	39920.8	97137.5	55655.9	133674	130284	123602	146122	121466	128368	94883.5	44546.3	76553.7	11576.9	99946.7	13610.9	134557	151134	150518	130580	154357	142550
met_9	279.196	9.534	21.492	171.29	12-hydroxy-5,8,10-heptadecatrienoic acid, [M-H]1-; 12S-HHTrE, [M-H]1-; Dihydropanaxacol, [M-H]1-; methyl (2E,6E,10R,11S)-10,11-epoxy-3,7,11-trimethyltrideca-2,6-dienoate, [M-H]1-	Unknown	4.08915e+06	3.27587e+06	3.83361e+06	108720	108988	185752	8218481	9541426	9267262	9255600	1.027157E7	9987679	146545	115434	124277	80827	201326	98293.1	1.05833E7	1.018696E7	1.032502E7	1.235567E7	9915374	1.111667E7	60856.9	60921.1	61752.2	111920	108894	114161	1.358162E7	1.677716E7	4.26057e+06	1.273454E7	4.58895e+06	1.428656E7
met_95	261.186	9.534	21.374	170.87	Ginsenoyne D, [M-H]1-; 1-Heptadecene-4,6-diyne-3,9-diol, [M-H]1-; 14:4(2E,4E,8E,10E)(6Me[S],9Me,12Me[S]), [M-H]1-; 7,10-heptadecadiynoic acid, [M-H]1-; 6,9-heptadecadiynoic acid, [M-H]1-; 5,8-heptadecadiynoic acid, [M-H]1-; 10E,16-heptadecadien-8-ynoic acid, [M-H]1-	Unknown	467602	437185	426932	227132	205993	158754	696362	952778	857010	871663	1063558	977848	671126	2445.07	3234.76	271372	201352	248812	1038774	1020893	1035503	1416621	934097	1182163	767728	957283	2664.32	2988.19	188334	258458	1591959	1905148	1776549	1472585	1759561	1777658
met_106	452.149	9.535	25.917	203.37	Unknown	Unknown	484612	592117	434072	375419	260476	20032.3	832859	1027351	934794	996264	1055688	962077	855458	708368	721600	305760	24717.3	470104	1072413	1047755	1105876	1222550	1038040	1127001	1.00271e+06	985290	906812	244820	380417	277065	1254461	1284185	1214788	1262455	1216891	1313063
met_1124	377.163	9.535	26.047	205.58	Eupahyssopin, [M-H]1-	Unknown	64175	59654.5	52395.5	35626.4	29864.4	33613.5	72137.4	70419.9	78870.6	66763.1	86859.9	82736.7	87451.6	74119.2	77803.7	37361.2	33277	36492.7	77454.9	95300.6	74240.1	86624.6	79034.5	88418.8	86908.2	98278.6	81407.5	42971.5	44997.8	53099.5	91816.2	103667	108540	78231.3	92176.2	96568.3
met_1140	362.118	9.535	25.061	198	Unknown	Unknown	55880.5	35096.7	36517.3	48194.1	34232.8	41977.9	26701.2	166199	28162	162746	41033.4	35946.3	39441.3	54343.6	42761.7	31235.5	65504.4	30866.3	89520.4	57572.5	144082	61060.6	29859.1	56149.7	50321.2	42153.4	54541.3	40667.2	21535.4	42242.3	78091.6	19982.2	43871.8	230963	37828.4	156339
met_1250	450.155	9.535	25.878	203.08	Unknown	Unknown	54808.2	58821.4	58753.2	16645.7	9075.08	11273.8	56428.1	72197.4	60939.5	67360	67161.2	61211.9	98708.5	89228.3	75707.7	15684.6	13078.5	15902.9	78635	76449.2	75282.3	84484.2	68716.6	71819.5	87566.2	95450.8	82554.9	13803.7	18014.3	30095.6	88546.5	88120.9	81098.8	85793.9	90733.9	96215.4
met_1429	377.171	9.535	24.714	194.95	Unknown	Unknown	49844.6	45276.3	47692.6	42399	35404.7	36090	56723.1	43019.8	61963.5	52690.5	63705	56423.7	65155.9	52489	58253.4	36548.8	33547.8	35289.2	61620.6	55868.3	56585.8	72274	59426.8	67271.8	67234	62167.6	58289.6	38617.7	43999.3	54893	75147.1	81082.2	81719.6	63720.6	82607.1	71016.3
met_2027	217.196	9.535	19.317	155.72	2,6,10-Trimethyl-(E,E)-2,6,10,12-tridecatetraene, [M-H]1-; 7-Ethyl-3,11-dimethyldodeca-1,3,6,10-tetraene, [M-H]1-	Unknown	27924.7	22654.6	21353.2	16149.5	18104.4	14606.1	20130.5	35771.1	28984	24408.8	33914.7	32739.9	34827.3	26611.4	27720.1	12189.4	22129	22627.3	38163.9	30560.2	34473.6	41756.4	31863.3	39549.8	37794.9	41045.1	42725.7	14978.8	10611.1	22211.6	57878.6	74270.3	67268.6	61940.2	63425.6	68187.4
met_2156	452.149	9.535	27.913	219.19	Unknown	Unknown	39566.5	35145.3	32861.4	30832.7	33390.9	26591.2	32960.1	34354.7	36257.5	33435.1	34895.9	40067.6	41512.1	47922.6	35864.7	37173.7	35150.4	30674	40196	35873.3	35490.4	38475.5	34524.3	39615.1	42594.7	47504.7	42993.5	40410.6	40401.3	39949.3	48744.5	49462.7	44472	39565.7	42630	45313.5
met_2265	369.091	9.535	23.275	183.61	Unknown	Unknown	35114.7	32932.6	32292.3	29498.3	30108.9	25618.9	31828.5	26694.8	39848.3	24615.8	36926.7	33676.8	43919.1	43926.6	39468	37583	33249	30037.5	34232.8	39588	28957.7	47688.4	45756.7	38343.6	47823.8	49562.5	43895.7	42189.4	46643.2	47098.8	37329	46737.4	47395.1	28593.9	61467.6	37005.9
met_2380	583.092	9.535	28.69	223.88	Unknown	Unknown	36991.9	33439.9	33564.3	30832.7	30589	26934	25178	37523.4	30883	30696.6	36314.7	32004	36054.9	38477.1	36488.8	38886.9	37139.6	33071.7	36224.8	31892.5	41582	34610.1	30581.1	35454	44457.3	43641.6	43562.6	44692.2	45158.7	43167.6	41025.8	38963.1	34376.7	39379.9	35903.8	41662.9
met_2735	217.196	9.535	24.069	194.58	2,6,10-Trimethyl-(E,E)-2,6,10,12-tridecatetraene, [M-H]1-; 7-Ethyl-3,11-dimethyldodeca-1,3,6,10-tetraene, [M-H]1-	Unknown	19838.6	21026.7	20988.3	16994.8	10594.8	13291.1	22585	20221.5	27265.3	18779.6	22324.2	29678	38315.8	30339.9	29925.7	24606.2	17062.7	15938.6	27786.6	24333.3	24934.2	32725.3	21967.5	43289.3	32165	34883.3	30219.4	18583.2	19417.2	25422.7	32203.6	49646.2	31808.8	31506.3	51631.6	47724.8
met_4809	422.086	9.535	24.295	190.91	Unknown	Unknown	136689	155509	140098	78654.1	89297.1	97656.1	110198	15640.5	10223.3	122429	11334.2	114850	200928	174561	166492	102079	100445	97240.8	141025	14533.7	15853.6	22484.7	10874.2	26920.8	172799	201159	171479	79863.6	103446	106961	24418	21351.7	17599.2	26263	23944.5	32610.8
met_5352	493.06	9.535	26.263	205.63	Unknown	Unknown	136689	155509	140098	78654.1	89297.1	97656.1	3468.16	13346.9	115293	20901.2	7011.57	4889.91	200928	174561	166492	102079	100445	97240.8	16396.3	10089.1	20914	13343.1	8552.05	14444.6	172799	201159	171479	79863.6	103446	106961	15195.2	7985.43	144376	35102.2	11807	24087.9
met_847	362.118	9.535	23.282	183.8	Unknown	Unknown	136689	155509	140098	78654.1	89297.1	97656.1	34684.7	197322	23247.4	182826	46789.6	51657.2	200928	174561	166492	102079	100445	97240.8	135353	65910.8	196760	89632.1	36895	87376	172799	201159	171479	79863.6	103446	106961	137544	70858.7	94110.2	352888	65024.3	283274
met_996	422.139	9.535	25.128	197.52	Unknown	Unknown	73514	55699.3	48797.6	62621.5	51110.2	51409.3	36926.3	186423	36801.8	166222	54550.3	47323	45291.5	59241	62865.5	38715.7	90348.5	34283.5	109872	71445.4	158700	61083.5	50669.2	75099	56943.3	40512.9	59684.4	49522	32758	58898.7	96308.2	62603.5	61999.4	226430	55044.1	168496
met_1576	396.136	9.536	24.235	190.8	Unknown	Unknown	52420.9	46728.3	48122.1	43744.1	34417.3	38434.2	50196.7	57502.5	45351.9	58417.4	57307.7	55891.8	56247	49849.1	58024.9	46464.8	38633.3	42279.2	60635.2	52393.9	64432.6	64269.3	52733	63891.7	64511.7	61249.7	60904.5	47160.7	42324.6	52775.6	81173.9	68180.6	69937.1	65337.3	71561.3	73371.7
met_3390	519.187	9.536	28.175	220.45	Unknown	Unknown	136689	155509	140098	78654.1	89297.1	97656.1	26817.7	25248.9	34624.2	27120.1	32354.8	16544.4	200928	174561	166492	102079	100445	97240.8	29828.3	27325.9	23596.9	16374.5	32389.5	12844.6	172799	201159	171479	79863.6	103446	106961	16204.3	14583.5	33013.8	22791.8	12154.6	14243.1
met_7617	413.169	9.536	25.435	200.09	Unknown	Unknown	136689	155509	140098	78654.1	89297.1	97656.1	110198	6415.97	8427.6	6233.31	7433.98	10910	200928	174561	166492	102079	100445	97240.8	141025	142363	9964.34	10840.6	112104	9963.29	172799	201159	171479	79863.6	103446	106961	10838.4	16008.8	17043.7	5354.95	16862.8	154750
met_2101	459.162	9.537	26.278	206.15	Eupahyssopin, [M-H+CH3COONa]1-	Unknown	136689	155509	140098	78654.1	89297.1	97656.1	38832.2	33771.8	39752.3	35182	44272.3	41360.7	200928	174561	166492	102079	100445	97240.8	36427.7	48924.5	37058.8	49729	45338.2	49160.2	172799	201159	171479	79863.6	103446	106961	53355.7	46567.6	25430.1	39661.1	26785.6	46993
met_3238	430.101	9.537	24.973	196.19	Unknown	Unknown	136689	155509	140098	78654.1	89297.1	97656.1	36530.1	117850	115293	40355.5	37731.2	37705.1	200928	174561	166492	102079	100445	97240.8	35820.4	40508.8	46932.3	143568	37146.8	46732.2	172799	201159	171479	79863.6	103446	106961	43960.4	156024	12585.1	30697.5	14528.6	154750
met_3827	391.14	9.537	24.309	191.48	Unknown	Unknown	15791.5	16022.6	15311.3	13135.5	9192.74	12340.5	17059	13293	20079.7	17451.5	20239	10586.2	23383.5	20631.5	19476.6	13838.2	12083.6	10236.8	20415.1	19996.3	15462	25190.2	20196.4	20102.6	22013.7	24997.4	18334.2	16264.2	9974.84	14454.1	23152.9	23186.7	28947.9	20311.7	25577.3	21709
met_4746	514.184	9.537	27.319	213.74	Unknown	Unknown	136689	155509	140098	78654.1	89297.1	97656.1	6568.68	10611.8	11660.4	12929.4	20720.7	11230.3	200928	174561	166492	102079	100445	97240.8	16368.3	16224	18963.9	19517.4	16345.2	17896.8	172799	201159	171479	79863.6	103446	106961	20395.7	21931.1	17932.5	14766.2	19664.9	18596.7
met_1073	395.137	9.538	24.26	191.03	Unknown	Unknown	79961.5	74216.1	68237.1	73495.5	64052.6	78072.4	60818.7	100156	64129.6	94428.8	71621.2	72776.1	71176.2	60393.2	82516.9	90402.2	60427.1	69492.6	105065	90825.6	100372	82241.8	76772.8	82138.8	92576.2	69252	80904.3	80684.5	86710.7	76202.2	106535	98000.7	86230.2	136964	89260.2	120674
met_3000	616.154	9.538	29.474	229.77	Unknown	Unknown	20108.6	24478.1	20594.7	25633.1	27756.1	23268.4	30402.2	26283	23940.3	24955.8	28392.3	32726.3	26520.7	30105.8	28356.7	34799.6	30804.2	28317	28865.5	31517.8	32840.8	30029.7	30676.3	31574.4	25933.2	24547.7	21384.3	28626.9	26497.3	33949.1	9719.11	23039.4	19242.9	24653.8	19479.5	29977.6
met_4771	393.135	9.538	26.426	208.31	Unknown	Unknown	136689	155509	140098	78654.1	89297.1	97656.1	19399	9700.92	24840.9	22984.9	12220	22651.3	200928	174561	166492	102079	100445	97240.8	19263.8	18403.8	16806.4	143568	20604.2	21479.1	172799	201159	171479	79863.6	103446	106961	145414	13869.7	10789.6	15783.5	22085.4	13446
met_5110	512.17	9.538	27.514	215.28	Unknown	Unknown	136689	155509	140098	78654.1	89297.1	97656.1	16969.7	117850	20823	17219.5	19038.7	21205	200928	174561	166492	102079	100445	97240.8	19813.8	142363	19154.8	143568	18386.6	20923.2	172799	201159	171479	79863.6	103446	106961	14444.4	4316.25	10283.7	6192.94	26442.8	13416.5
met_1385	475.139	9.539	26.505	207.75	Unknown	Unknown	136689	155509	140098	78654.1	89297.1	97656.1	69884.8	58493.6	85961.9	61279.3	86839.8	71703.1	200928	174561	166492	102079	100445	97240.8	71108.6	81623	65624.4	85739.2	80757.9	74046.8	172799	201159	171479	79863.6	103446	106961	80107.1	43937.9	77596.9	56790.5	43820.2	33477.2
met_5622	593.112	9.54	28.991	226.17	Unknown	Unknown	136689	155509	140098	78654.1	89297.1	97656.1	110198	14689.7	12669.2	10037	11181.5	12795.8	200928	174561	166492	102079	100445	97240.8	13470.9	14668.2	142498	19258.2	15275.1	140749	172799	201159	171479	79863.6	103446	106961	18032.3	21507.1	16545.4	17934.9	8010.36	16290
met_4356	477.139	9.541	27.95	219.17	Unknown	Unknown	136689	155509	140098	78654.1	89297.1	97656.1	18631.4	24704.9	16051.6	22710.3	22539.4	18308.3	200928	174561	166492	102079	100445	97240.8	13837.9	18317	24975.5	8127.43	18225.5	20731.6	172799	201159	171479	79863.6	103446	106961	24676.5	11604.8	10515	12503.2	145810	12360.2
met_2578	301.178	9.542	24.187	192.41	Unknown	Unknown	136689	155509	140098	78654.1	89297.1	97656.1	31859.9	36085.6	30256.5	36053.1	34641.7	114850	200928	174561	166492	102079	100445	97240.8	36348.8	30474.9	27085	37668.1	42488.3	43476.6	172799	201159	171479	79863.6	103446	106961	50403.4	22050.2	15668	34657.2	49666.9	15740.6
met_5430	459.166	9.542	28.124	220.76	Eupahyssopin, [M-H+CH3COONa]1-	Unknown	136689	155509	140098	78654.1	89297.1	97656.1	15893.5	12007.8	23008.4	122429	14139	16685.3	200928	174561	166492	102079	100445	97240.8	19446.6	16071.5	6762.57	18398.9	18174	16373.5	172799	201159	171479	79863.6	103446	106961	6181.62	8651.02	7157.12	5152.43	16389.2	7824.42
met_7183	567.097	9.549	28.066	219.08	Unknown	Unknown	136689	155509	140098	78654.1	89297.1	97656.1	14449.4	9146.64	14442.4	122429	13675.6	14462.7	200928	174561	166492	102079	100445	97240.8	8090.01	142363	142498	10017.3	15235.5	7423.79	172799	201159	171479	79863.6	103446	106961	3892.03	12064.6	8215.81	9009.05	3506.11	5069.89
met_636	448.155	9.55	25.659	201.37	Unknown	Unknown	102659	94301.6	110607	119949	91456.4	130230	112102	139124	133466	128825	148366	150628	104888	89826.8	101283	99778.7	53669.5	114375	156014	147874	149486	184146	144256	157235	8920.91	9506.45	105085	147631	86651.5	116327	204636	217899	216177	200187	220221	215809
met_3599	269.212	9.595	20.702	165.2	(+)-12-hydroxy-9Z-hexadecenoic acid, [M-H]1-; 10-keto palmitic acid, [M-H]1-; 10-oxo-14-methyl-pentadecanoic acid, [M-H]1-; 11-keto palmitic acid, [M-H]1-; 15-oxo-hexadecanoic acid, [M-H]1-; 16-hydroxy-5-hexadecenoic acid, [M-H]1-; 16-hydroxy-6-hexadecenoic acid, [M-H]1-; 16-hydroxy-9E-hexadecenoic acid, [M-H]1-; 2-keto palmitic acid, [M-H]1-; 2-methyl-4-oxo-pentadecanoic acid, [M-H]1-; 3-keto pa…	Unknown	14600.8	16276.3	15889.3	22579.5	4332.9	4849.53	18584.3	13883.7	19391.4	12326.7	16679.1	14933.6	19658	23590.6	15054.3	13915.9	11101.7	13004.1	14081.6	17901.7	10246.6	28568.6	13776.6	25962.8	15684.9	16607.2	16579.3	8254.97	12298.1	11124	16170.9	21150.9	24685.3	12360.9	10970.7	12150.2
met_4063	323.185	9.609	22.18	175.75	Cibaric acid, [M-H]1-; Dinor-PGE2, [M-H]1-; Dinor-PGD2, [M-H]1-	Unknown	18286.8	20265.9	17913.6	14573.4	12791	15619.4	13391.6	10879.2	7993.96	11326.7	8250.94	12730.3	12843.3	7760.91	15164.5	13586.3	12615.4	11103	13293.1	12531	10743.4	11548.2	14022.5	13540.4	13672.7	17152.5	16203.1	8307.94	15717	14994.8	4677.88	13215.4	12538.5	8430.36	9697.02	9752.58
met_2778	486.03	9.622	25.048	196.08	Unknown	Unknown	39464.3	13858.1	18659	20512.1	12377.1	22636.8	11868.3	21407.7	15807.2	23024.1	11514.7	14047.8	11954.6	29317.6	13810.3	9119.14	13800	11506.9	31306.3	16908.1	14647.6	23244	8570.59	19683	27194.8	17218.6	16475.2	16743.8	6198.91	12728.8	25379.6	17082.1	16218.7	15192.6	14796.2	13728.9
met_2929	267.196	9.633	20.52	163.79	(1R,2R)-3-oxo-2-pentyl-cyclopentanehexanoic acid, [M-H]1-	Unknown	5893.8	5891.69	11954.4	6561.69	1987.8	4095.66	9570.55	11982.7	10733.7	9655.52	5396.3	10186.1	32281.5	30431.6	37388.1	7791.51	3666.55	5937.81	23519.5	14204.8	22970.6	20363.9	15981	21656.1	33409.6	44147.9	35108.1	12117.7	3538.73	5279.23	18200	18584.9	13537.1	18144.8	22257.3	19529.1
met_1172	429.332	9.646	27.077	212.9	Unknown	Unknown	43614.5	31836	44261.2	44463.6	29242.2	59837.5	37698.8	48270.3	37708.2	47944.4	40463.4	39964.8	58700.9	38493.9	50338.3	35721.5	38410	28412	57642.8	38093.9	37914.4	45683.2	9584.59	46462.8	37975.2	41118.1	59276.1	33821.2	33112.2	57364	36026.5	36328	42202.3	31174	38642.5	49723.3
met_473	335.222	9.724	22.743	180	(+/-)11,12-Ep-15S-HETrE, [M-H]1-; 10,11-dihydro-12-oxo-LTB4, [M-H]1-; 11,12-DiHETE, [M-H]1-; 11,12-epoxy-8-hydroxyeicosa-5,9,14-trienoic acid, [M-H]1-; 11-HpETE, [M-H]1-; 11-deoxy-PGE2, [M-H]1-; 12S-HpETE, [M-H]1-; 14,15-DiHETE, [M-H]1-; 14,15-Ep-11-HETrE, [M-H]1-; 14,15-HxA3 (11S), [M-H]1-; 14,15-HxB3 (13R), [M-H]1-; 14,15-dihydroxy-5,8,10,12-eicosatetraenoic acid, [M-H]1-; 14-hydroperoxy-5Z,8Z,…	LT-like, [M-H]1-	130366	122409	122389	88698.3	91119.3	66151.9	94469.7	82389.6	84150.9	70135.6	78543.8	82428.7	230599	181632	216452	121941	9104.05	9732.71	134343	129085	140554	135268	99944.3	132806	211961	241962	257506	147868	170029	167915	182347	227289	204140	167238	211301	187185
met_2557	391.287	9.737	24.964	196.7	Unknown	Unknown	23344.1	24288.7	36352.3	22947.2	19714.6	20177.5	32859.1	19266.6	20210.3	20042.3	15307.4	18665.5	20670.7	16384.5	32795.8	24928.2	30973.5	24779.4	25277.9	44202.2	20285	17111.1	25893.9	24550.2	30220.9	26605.6	19749.5	23744.7	18619.4	21464.1	22346.8	25405	26857.3	25889.5	24174	25156.9
met_3761	243.196	9.739	20.181	161.8	10-hydroxy-tetradecanoic acid, [M-H]1-; 11-hydroxy-tetradecanoic acid, [M-H]1-; 3-hydroxy-tetradecanoic acid, [M-H]1-; 5-hydroxy-tetradecanoic acid, [M-H]1-; 6-hydroxy-tetradecanoic acid, [M-H]1-; alpha-hydroxy myristic acid, [M-H]1-; omega-hydroxy myristic acid, [M-H]1-	Unknown	8479.65	6959.79	5881.39	8001.16	6789.08	4260.94	8595.34	6824.01	9546.49	22527.3	10355	9369.97	10566.6	5862.26	15878.5	18102.3	5070.82	10046.3	16007.3	6862.42	9689.69	22064.9	6642.96	24804	8025.28	8394.31	5135.23	8273.75	10078.8	21294.5	7855.93	9369.2	22648	6688.13	8175.62	13613.4
met_6662	417.224	9.739	25.569	201.11	Unknown	Unknown	9545.51	6152.68	8222.63	7432.61	10534.1	7337.21	6956.25	3662.25	6581.5	7839.94	2762.63	4780.68	18567.2	7823.12	15355.5	9810.76	5877.89	6668.72	9188.62	6377.14	8164.51	6378.53	3920.82	11615.3	16381.2	15917.1	13870.7	8959.56	8393.24	10922.4	4444.82	7769.44	6046.97	9467.43	6987.44	6248.44
met_7338	236.971	9.767	19.926	159.94	Unknown	Unknown	7606.03	6013.33	10785.2	5206.95	6112.92	12360.5	5559.13	15615.2	3484.95	6870.11	6819.43	5764.03	5020.28	5504.84	6956.84	5022.85	6646.58	10330.9	5163.35	6237.08	5868.02	9355.12	12164.7	5410.32	5061.6	5504.94	6141.25	6446.53	5560.64	4658.57	10287.4	2921.12	4216.75	5670.02	6823.02	5153.08
met_1997	279.196	9.824	21.175	168.74	12-hydroxy-5,8,10-heptadecatrienoic acid, [M-H]1-; 12S-HHTrE, [M-H]1-; Dihydropanaxacol, [M-H]1-; methyl (2E,6E,10R,11S)-10,11-epoxy-3,7,11-trimethyltrideca-2,6-dienoate, [M-H]1-	Unknown	136689	155509	140098	78654.1	89297.1	97656.1	110198	16519.2	31105.2	10377.4	10293.7	114850	200928	2391.29	166492	102079	100445	97240.8	34666.2	49460	9984.22	94763.9	32034.1	46569.9	172799	201159	171479	79863.6	103446	106961	49223	32117.4	40014.7	38286.8	67152.9	27674.3
met_3769	335.221	9.833	22.916	181.41	(+/-)11,12-Ep-15S-HETrE, [M-H]1-; 10,11-dihydro-12-oxo-LTB4, [M-H]1-; 11,12-DiHETE, [M-H]1-; 11,12-epoxy-8-hydroxyeicosa-5,9,14-trienoic acid, [M-H]1-; 11-HpETE, [M-H]1-; 11-deoxy-PGE2, [M-H]1-; 12S-HpETE, [M-H]1-; 14,15-DiHETE, [M-H]1-; 14,15-Ep-11-HETrE, [M-H]1-; 14,15-HxA3 (11S), [M-H]1-; 14,15-HxB3 (13R), [M-H]1-; 14,15-dihydroxy-5,8,10,12-eicosatetraenoic acid, [M-H]1-; 14-hydroperoxy-5Z,8Z,…	LT-like, [M-H]1-	14869.2	3244.01	11993.2	13776.6	16471.2	4735.08	7568.98	14054.7	5654.22	17552.2	11707.5	18434.7	19938	18223	12258.6	7802.32	13730.6	12535.3	16499.2	17521.5	18146.9	21084.8	13503.6	6541.33	3117.65	44781.1	13412.3	15878.8	9019.17	12547.8	14448.9	42664.8	35588.5	32382.4	37618.9	36772.8
met_5911	315.253	9.87	22.723	180.28	threo-9,10-Dihydroxystearic acid, [M-H]1-; 15,16-dihydroxy-octadecanoic acid, [M-H]1-; 9,14-dihydroxy-octadecanoic acid, [M-H]1-; 4,14-dihydroxy-octadecanoic acid, [M-H]1-; 12,13-dihydroxy stearic acid, [M-H]1-; 11,12-dihydroxy stearic acid, [M-H]1-; 9,12-dihydroxy stearic acid, [M-H]1-; 10,11-dihydroxy stearic acid, [M-H]1-; 9R,10S-dihydroxy-stearic acid, [M-H]1-; 8,9-dihydroxy stearic acid, [M-…	Unknown	6938.82	3306.43	6812.17	14651.7	4620.15	6368.12	12145	6890.62	500.749	8897.94	6044.66	8206.75	7167.61	4869.86	5583.24	10977.9	13122	4718.46	12641	6229.22	8357.07	6113.76	7409.94	15307.1	8388.64	6778.12	4366.31	6282.65	8013.94	14623.9	6322.16	6699.22	9576.99	6474	6730.03	7113.13
met_2902	257.175	9.874	20.392	163.05	4-methyl-tridecanedioic acid, [M-H]1-; 3-methyl-tridecanedioic acid, [M-H]1-; 2-methyl-tridecanedioic acid, [M-H]1-; Tetradecanedioic acid, [M-H]1-; Diisobutyl adipate, [M-H]1-; DIBUTYL ADIPATE, [M-H]1-	Unknown	15638	16685.3	22949.2	10888.2	11241.4	8981.38	17539.5	10221.2	10159.8	16802.5	6616.06	7969.55	18048.2	24151.2	16844.8	14887.2	6762.7	9884.26	16339.7	8663.58	10499.3	20660.2	9222.79	20856.1	29493.2	10295.5	12634.4	13126	26037.5	30810.5	18486.5	14318.7	24683.6	8545.06	11362.1	12962.8
met_4003	315.195	9.881	22.694	180.07	preclavulone lactone I, [M-H]1-; 8-deoxy-J2-IsoP, [M-H]1-; ent-15-deoxy-J2-IsoP, [M-H]1-; 5-deoxy-J2-IsoP, [M-H]1-; 12-deoxy-J2-IsoP, [M-H]1-; PGA2 1,15-lactone, [M-H]1-; 15-deoxy-delta-12,14-PGJ2, [M-H]1-; 15-deoxy-delta-12,14-PGA2, [M-H]1-	Unknown	5726.48	12451.9	11309.1	14201.1	6010.92	6820.1	8930.77	10548	11440.4	25288.1	15036.4	11416.3	16863.5	11232.6	5515.82	17915.2	9649.21	4976.49	19324.3	9524.37	9369.6	25939.9	17914.9	43990.2	23122.6	12458.8	12137.5	12965	11020.3	29937.4	12600.5	13187.4	39596.7	9434.72	5247.68	13351.7
met_1616	391.287	9.893	24.953	196.62	Unknown	Unknown	48151.1	27192.4	39704	30912.6	26833.6	32173.8	48725	61721.2	37518.3	28568.5	29666	25859.9	21221.4	27134.1	45706.7	20997.6	87687	25964.4	34614.2	58069.5	34366.7	30500.1	23060.9	58926	33888	36660.8	23570.5	34109.4	17993.6	34445	41195.7	25839.8	26390.6	54037	57111.7	24420.4
met_209	277.18	9.912	21.142	168.52	12-oxo-5E,8E,10Z-heptadecatrienoic acid, [M-H]1-; 7-hydroxy-10E,16-heptadecadien-8-ynoic acid, [M-H]1-; Panaxytriol, [M-H]1-	Unknown	346902	339203	83635.4	276811	246891	220509	254359	303601	283837	243765	279222	286065	492511	521148	522730	365669	309239	286408	847154	871405	856013	953453	643064	824617	377730	451401	434871	331596	330738	285504	561080	652969	622342	464439	566202	550494
met_1837	510.154	9.918	26.988	211.16	Unknown	Unknown	39203.2	35193.9	34649.3	40596.1	36764	36685.8	21871.4	24850.2	25711.5	23087.4	25488.2	22466.8	74277.2	67727.6	71926.6	61270	51119.6	42801.1	76907	79011.7	71501.8	78575.2	54840.9	75732.3	52862.6	53576.8	50782.3	38349.6	42461.8	47679	47399.9	54813.7	52305.5	44309.1	48459.9	52870.6
met_1485	233.191	9.919	21.121	169.8	10E,12E,14E-Hexadecatrienal, [M-H]1-; 13Z-Hexadecen-11-ynal, [M-H]1-; 4,6,11-hexadecatrienal, [M-H]1-; 7Z,11Z,13E-Hexadecatrienal, [M-H]1-	Unknown	44297.4	44521.1	43221.6	42881	40663.6	45593.1	25850.1	30233	34006.1	17758.4	28910.9	32349	88145.4	84610.8	77638.1	71684.8	70423.9	52333.6	108251	90173.1	100446	120897	68643.2	90782.6	73788.3	77192.6	68959.3	67068.1	81261	92367.5	60083.9	64911.4	73135.2	55149.5	59324.5	59322.1
met_1510	359.183	9.919	23.972	189.36	12-oxo-5E,8E,10Z-heptadecatrienoic acid, [M-H+CH3COONa]1-; 7-hydroxy-10E,16-heptadecadien-8-ynoic acid, [M-H+CH3COONa]1-; Panaxytriol, [M-H+CH3COONa]1-	Unknown	42185.8	42079	42088.2	34534.2	30511.5	36859.2	29892	33805.4	35408.2	17038.6	31035.3	29268	81660.7	80709.5	73978.7	54079.6	51785.6	43394.3	99982	90400.2	95254.4	99301.4	77716	90915.7	71308	74342.9	68549.6	52512.1	62385.7	72226.5	57499.2	67978.2	72956.8	42438.1	66948.4	66030.7
met_4716	299.162	9.919	23.9	190.16	Unknown	Unknown	136689	155509	140098	78654.1	89297.1	97656.1	8501.87	3660.87	10677.5	6353.69	9457.35	7309.86	200928	174561	166492	102079	100445	97240.8	24347.3	22273.5	22818.4	27196.3	20300.6	22770.7	172799	201159	171479	79863.6	103446	106961	18161.2	20319	16232.5	11766.1	18163.6	16589.3
met_5397	453.141	9.919	25.261	198.17	Unknown	Unknown	136689	155509	140098	78654.1	89297.1	97656.1	1824.42	8328.58	5625.85	7857.82	4176.01	114850	200928	174561	166492	102079	100445	97240.8	26194.2	21075.6	23403.8	23089.2	16208	19560	172799	201159	171479	79863.6	103446	106961	14584.4	14885.7	12074.7	12249.8	10272.6	14020.2
met_7396	435.168	9.919	25.611	201.18	Unknown	Unknown	136689	155509	140098	78654.1	89297.1	97656.1	110198	4073.38	6164.74	2245.84	114960	4743.35	200928	174561	166492	102079	100445	97240.8	13995.1	13574.8	14150.9	15702	10620	12153.5	172799	201159	171479	79863.6	103446	106961	8756.64	9330.58	10457.4	157032	4808.47	10024.8
met_3351	420.123	9.92	24.741	194.49	Unknown	Unknown	136689	155509	140098	78654.1	89297.1	97656.1	5503.33	29343	115293	18470.6	6651.3	5054.27	200928	174561	166492	102079	100445	97240.8	44767.5	24054.4	73894.9	25762.6	9158	26518.1	172799	201159	171479	79863.6	103446	106961	22037.2	9812.61	14233.9	55829.5	11648.8	41261.6
met_2147	315.253	9.999	22.711	180.19	threo-9,10-Dihydroxystearic acid, [M-H]1-; 15,16-dihydroxy-octadecanoic acid, [M-H]1-; 9,14-dihydroxy-octadecanoic acid, [M-H]1-; 4,14-dihydroxy-octadecanoic acid, [M-H]1-; 12,13-dihydroxy stearic acid, [M-H]1-; 11,12-dihydroxy stearic acid, [M-H]1-; 9,12-dihydroxy stearic acid, [M-H]1-; 10,11-dihydroxy stearic acid, [M-H]1-; 9R,10S-dihydroxy-stearic acid, [M-H]1-; 8,9-dihydroxy stearic acid, [M-…	Unknown	27137.2	29495	17266.3	22349.3	22054	12515.6	20535.7	14700.2	28465	20352.3	20275.5	23302.4	27878.7	17790	25523.4	23245.2	19167.7	10923.6	20862.6	22606.7	18740.6	22198.1	23049.2	21748.3	28337.6	15709.4	14967.3	11262.6	18137.3	14779.9	15783.6	18514.9	23719.8	13449.9	11979.2	19071.2
met_2406	233.154	10.046	19.473	156.39	4,6-Decadiyn-1-ol isovalerate, [M-H]1-	Unknown	25238.8	21090.5	9573.51	10780.1	26219.7	29937.9	34097.8	16529.7	8955.61	10567.3	16370.6	23673.3	7392.04	16494.2	23200.7	18029.5	22477.1	29573.8	22455	19886.9	21855.7	21095	20581.4	24817.7	25667.8	20668.6	21587.7	17551.5	19555.3	8945.39	17563.1	20550.9	19665.8	15319.2	18635.4	10049.4
met_5374	238.98	10.048	19.439	155.89	Unknown	Unknown	10033.7	15402.9	13556.3	11444.3	9637.43	12501.6	10096.7	7830.57	14053.8	10304.6	12740.5	9092.76	8665.59	10109.4	11397.7	11375	10705.6	12440.7	11718.5	16093	11230.7	9343.41	8478.97	10644.8	13651.3	12795	17631.9	12041.9	11160.2	10277.1	9923.49	7532.63	17657.6	13547	18470.6	15915.2
met_1524	391.287	10.079	24.968	196.73	Unknown	Unknown	40117.2	40801.7	56522.6	37274.9	32522.6	35937.7	42729.1	31632.4	16239.6	69418.7	31399.2	41515.5	46804.4	31321.2	21854.7	36465.9	60395.5	41778.4	33655.8	63238.4	45128.8	35727	68372.1	80021.8	21612.3	17250	42160.1	29546.4	28626.2	35922.9	44499	31871.3	47195.8	58934.1	40947.7	36145.1
met_5504	279.196	10.124	23.197	185.05	12-hydroxy-5,8,10-heptadecatrienoic acid, [M-H]1-; 12S-HHTrE, [M-H]1-; Dihydropanaxacol, [M-H]1-; methyl (2E,6E,10R,11S)-10,11-epoxy-3,7,11-trimethyltrideca-2,6-dienoate, [M-H]1-	Unknown	136689	155509	140098	78654.1	89297.1	97656.1	2378.52	117850	4304.95	122429	2008.05	2967.54	200928	174561	166492	102079	100445	97240.8	7994.11	12248.7	6285.52	26246.2	6730.09	9775.86	172799	201159	171479	79863.6	103446	106961	10914.9	7884.48	6093.21	6727.48	7871.52	4578.23
met_4457	299.222	10.13	21.393	169.97	8-methyl-hexadecanedioic acid, [M-H]1-; 5-methyl-hexadecanedioic acid, [M-H]1-; 4-methyl-hexadecanedioic acid, [M-H]1-; 3-methyl-hexadecanedioic acid, [M-H]1-; 2-methyl-hexadecanedioic acid, [M-H]1-; Heptadecanedioic acid, [M-H]1-	Unknown	11591.5	8871.82	12485.5	9457.61	6282.26	9286.41	9037.54	8474.77	6647.22	3427.57	12736.6	9281.23	11722.1	10419	11963.2	15283.1	8325.94	9165.01	5605.31	9836.49	13352.4	12665.6	10832.6	14221.6	11101.7	8874.94	12356.6	10922	22377.6	16696.1	11781	21216.4	11780.3	6232.69	8328.68	10202.6
met_3374	233.154	10.14	19.474	156.39	4,6-Decadiyn-1-ol isovalerate, [M-H]1-	Unknown	13887	10312.5	13452.8	13232.7	22295.2	10188.6	12823.9	18470.8	14486.7	14958.3	13244.3	17686.8	10557.9	17501.3	14764.7	15614.4	9704.73	13917.4	29802	14536.7	26418	15210.7	12912.6	12355	9850.23	16593.8	18820.4	13031.6	31136.2	16348.3	14179.2	23679.6	12060.1	6511.26	21110.3	12250.1
met_2927	281.211	10.168	21.155	168.52	12-hydroxy-8E,10E-heptadecadienoic acid, [M-H]1-; 12S-hydroxy-16-heptadecynoic acid, [M-H]1-; 7-hydroxy-10-heptadecen-8-ynoic acid, [M-H]1-	Unknown	21412.7	14050.4	13868.1	14190.4	15183	15696.7	4416.47	3373.2	3864.24	23034.7	5749.46	12783.3	4724.39	12665.9	7030.96	15442.3	14979.2	15508.8	79423.5	64063.5	67416.3	73847.5	67660.8	78722.5	14748.7	11394.4	15891.3	17122.6	14120.2	20669.9	7498	6305.57	6028.98	9881.36	6431.1	9386.52
met_5388	315.195	10.177	22.82	181.07	preclavulone lactone I, [M-H]1-; 8-deoxy-J2-IsoP, [M-H]1-; ent-15-deoxy-J2-IsoP, [M-H]1-; 5-deoxy-J2-IsoP, [M-H]1-; 12-deoxy-J2-IsoP, [M-H]1-; PGA2 1,15-lactone, [M-H]1-; 15-deoxy-delta-12,14-PGJ2, [M-H]1-; 15-deoxy-delta-12,14-PGA2, [M-H]1-	Unknown	14973.8	7231.07	7515.22	14712.8	7918.35	9536.7	16761.7	8263.63	10992	6876.31	8892.45	8939.94	6619.19	4179.17	3486.32	9161.63	7733.76	8225.5	4900.49	8197.13	9629.6	7861.5	7831.28	9832.08	18965.2	7945.28	2495.52	6521.6	12663.5	6017.94	3244.96	9473.65	8948.88	5300.4	4339.45	5532.91
met_2071	337.237	10.19	23.043	182.37	(+/-)14,15-DiHETrE, [M-H]1-; 10,11-dihydro-leukotriene B4, [M-H]1-; 11-deoxy-PGE1, [M-H]1-; 11-deoxy-PGF2a, [M-H]1-; 12-keto-10,11,14,15-tetrahydro-LTB4, [M-H]1-; 6,7-dihydro-12-epi-LTB4, [M-H]1-; 8R,9S-cis-epoxy-10S-hydroxy-eicosa-11Z,14Z-dienoic acid., [M-H]1-	89DHET, [M-H]1-	10784.8	9390.93	7829.08	10913.3	8978.99	13877.2	17725.1	16074.2	7140.87	5493.51	14954.2	14895.8	26563.5	18596.4	4191.28	30313.7	20346.8	21343.9	36088.5	48007.1	29496.9	4142.63	25303.4	30871.8	35124.4	29292.1	37290.4	16242.8	16010.2	17620.1	50617.4	62153.4	56838.3	45298.2	68813.9	64798.9
met_2209	285.116	10.194	21.23	169.01	Unknown	Unknown	42350.6	32389.8	20958.9	15003.6	38725.7	22008.3	36905.5	24415	19546.6	35583.5	25968.1	19788.9	12416.9	11939.1	23039.1	23939.8	13707.6	28252.1	22208.3	12360	20198.9	15516.5	21000.6	23230.6	19145.8	44588.8	29213.8	14312	38065.5	39591.2	30215.7	17354.6	29479.8	19578.2	23459.4	16534.5
met_1104	391.287	10.198	24.967	196.73	Unknown	Unknown	40957.3	52068.6	34426.8	39174.2	43672.3	49974	94524.1	35080.6	55638.6	57232.4	56549.4	21174.6	32604.8	58341.6	72027.5	86294.4	52864.2	75371.4	31942	44845.2	77174.8	47667.7	45382.5	35712.7	35165.2	60621.9	52633.5	34467.2	71441.9	33997	28556.8	102215	56309.8	60332	72830	33055.2
met_532	233.154	10.293	19.476	156.41	4,6-Decadiyn-1-ol isovalerate, [M-H]1-	Unknown	147067	154369	194978	92198.5	118421	74719	75801.5	76531.5	51380.1	68544.7	94055.9	111348	194192	93167.8	113325	140663	120591	96724.5	63883.6	94387.7	78744.2	70990.6	72234.7	106228	143816	166230	138613	98984.1	103638	138112	36116.6	81074.8	124866	66540.6	80114	78651.8
met_509	430.973	10.312	19.937	156.17	Unknown	Unknown	123716	88955.9	111996	106768	79844.2	95435.8	142207	112998	87512.4	130485	112481	98479.7	85192.7	98979.1	81642	130852	128247	106594	91043.6	108472	128568	79415.3	104060	105636	77908.6	91795	90612.3	144594	109399	98195.4	120633	119047	95621.2	114385	136195	133261
met_1251	494.968	10.313	19.985	155.94	Unknown	Unknown	47178.5	40914.2	44036.3	34836	32029.3	30879.4	45069.3	38772.9	29162.5	46974.7	34990	38569.2	28306.1	35233.9	28441.5	42798.5	48811.4	42174.3	32191.1	40402.7	40568.8	35231.6	33407.3	40112.4	28866.6	35462.5	31304.6	52200.6	40705	31373.8	42623.2	42117.6	36187.4	38331.2	50163.4	47331.9
met_1925	526.313	10.316	29.553	231.26	Unknown	Unknown	15834.4	15631.8	16296	7824.63	10037.2	15221.5	13000.1	9648.4	1842.21	9195.18	7344.68	11681.8	51217.2	37680.8	48233.4	49371.9	36307.9	41141	36306.8	35978	40515.4	32963.6	34131.6	32069.4	20765.6	22019.6	20661.6	23573.5	28721.2	27383.7	11651.6	14008.4	11440.6	10931	14111.4	12392.7
met_2937	430.972	10.316	19.285	150.99	Unknown	Unknown	17955.4	12498.4	19910.6	15673.2	5991.68	15367.8	15139.9	18805.1	11361.9	18870.6	13105.8	14183.7	12048.6	12203.2	11283	18470.7	21840	16762	13273.3	11566.3	18853	14576.5	14420.4	15224.1	6887.28	11529.3	13050.2	23073.3	12893.7	14542.4	8155.08	18401.5	17929	20230.3	20399.7	18309.2
met_10097	598.185	10.326	29.04	226.51	Unknown	Unknown	136689	155509	4773.27	78654.1	89297.1	97656.1	110198	117850	115293	122429	114960	114850	18835.8	6116.61	17848.1	102079	100445	97240.8	141025	142363	142498	143568	112104	140749	6640.77	8979.13	10602.7	79863.6	103446	106961	145414	156024	144376	157032	145810	154750
met_1971	580.264	10.326	29.4	229.52	Unknown	Unknown	24036.5	47695.9	26192.3	78654.1	89297.1	97656.1	110198	117850	115293	122429	114960	114850	175176	92792	87902.3	102079	100445	97240.8	2849.93	142363	142498	16922.5	3553.05	8610.18	62360.2	135964	51629.4	2755.81	3405.92	106961	145414	156024	144376	157032	145810	154750
met_269	498.261	10.329	27.133	212.44	Unknown	Unknown	218134	425747	224686	12420	10030.8	8913.01	7990.7	7291.14	21875.7	6844.34	8166.3	66476.3	1539119	777455	781180	54107.7	47752.1	73426	36023.6	49934.1	21884.1	135872	32553	72988.1	541166	1147264	497917	44343.1	40436	36134.6	59184.7	28207.6	23660.8	19777.8	24515.8	29957.7
met_5362	281.212	10.333	21.727	173.14	12-hydroxy-8E,10E-heptadecadienoic acid, [M-H]1-; 12S-hydroxy-16-heptadecynoic acid, [M-H]1-; 7-hydroxy-10-heptadecen-8-ynoic acid, [M-H]1-	Unknown	136689	155509	140098	78654.1	89297.1	97656.1	110198	10999.8	15126.2	122429	11473.4	12291.9	200928	174561	166492	102079	100445	97240.8	12104.1	13996.5	12455.4	21425.1	9760.34	13927.7	172799	201159	171479	79863.6	103446	106961	18716.8	25916.5	24131.7	16475.7	145810	22617.4
met_11826	287.2	10.399	22.712	180.94	Unknown	Unknown	1572.6	155509	1738.61	78654.1	89297.1	97656.1	110198	117850	115293	122429	114960	114850	200928	8310.3	8277.44	102079	100445	97240.8	141025	6181.88	142498	143568	112104	140749	8687.01	9364.99	6231.92	79863.6	103446	106961	145414	156024	144376	157032	145810	154750
met_6407	474.26	10.403	26.511	207.81	Unknown	Unknown	9803.93	16410	5519.99	78654.1	89297.1	97656.1	110198	117850	115293	122429	114960	114850	41252.2	18119	19724.3	102079	100445	97240.8	141025	142363	142498	143568	112104	140749	9433.51	23779.7	9500.38	79863.6	103446	106961	145414	156024	144376	157032	145810	154750
met_1558	331.19	10.405	22.581	178.79	5S,6S-epoxy-18R-HEPE, [M-H]1-; PGA3, [M-H]1-; PGB3, [M-H]1-; PGE3 1,15-lactone, [M-H]1-; PGJ3, [M-H]1-	Unknown	43850.9	43570.3	38838.7	7667.12	5789.17	22792.2	6306.22	22045.5	18445.7	22153.8	8048.27	13735.2	88681.3	100027	78976.1	22325.4	25863.9	20669.1	14621.8	44704.8	35558.3	63427.3	16334.6	35496.9	66266.6	81912	75848.9	6471.26	6646.73	16695.2	50713.5	33528.8	25102	32383.5	20631.2	39374.3
met_6001	267.195	10.406	20.792	165.97	(1R,2R)-3-oxo-2-pentyl-cyclopentanehexanoic acid, [M-H]1-	Unknown	6116.16	5746.9	7430.62	7607.5	7106.87	7116.79	7196.02	7094.65	3185.16	6997.36	9606.93	8864.14	13071.2	8049.96	11949.6	12540.9	8767.5	11824.9	12831	9140.82	7353.4	15896.8	12782.9	11961.9	1019.98	6118.75	10782	8056.06	6610.72	10517.9	7596.28	12893.1	11504.2	5919.77	10706.4	7205.48
met_946	277.144	10.414	20.803	165.79	Unknown	Unknown	28372.2	20360.3	6045.54	32480	21998.5	56851.8	30105.6	29210.3	28189	43913.2	15467.6	17347.4	93776.2	37027.7	89423.6	96372.9	44860.2	57461.5	142370	17331.3	50802.5	48267.6	46932.5	116968	94331.4	59243.5	117639	23132.9	25494.1	86592.2	30587.4	70296.4	71793	36514.2	26508.2	31203.1
met_477	391.286	10.419	25.1	197.79	Unknown	Unknown	66870.9	108236	99277.2	112901	99918.3	97910	192202	72128.6	47676.9	80988.5	90581	74645.4	131988	285137	158755	166932	131291	168480	134683	128225	226575	179354	121725	134359	118094	131797	121662	132100	120512	129730	101787	113686	130938	153430	161539	105711
met_1080	363.214	10.432	24.367	192.43	12-hydroxy-8E,10E-heptadecadienoic acid, [M-H+CH3COONa]1-; 12S-hydroxy-16-heptadecynoic acid, [M-H+CH3COONa]1-; 7-hydroxy-10-heptadecen-8-ynoic acid, [M-H+CH3COONa]1-	Unknown	53157.7	48988.8	46006.4	21871.1	13608.8	15513.5	57183.3	61158.6	66760.8	58914.4	76977.6	81992.9	92814.2	83919.8	73191.5	13822.3	16893.7	16864.9	78222.2	70218.6	73138.7	106370	67618.1	92088.5	89450.9	100293	90343.4	12555.4	21392.7	26005.1	115280	148862	134667	93857.2	146505	133326
met_180	281.212	10.432	21.914	174.64	12-hydroxy-8E,10E-heptadecadienoic acid, [M-H]1-; 12S-hydroxy-16-heptadecynoic acid, [M-H]1-; 7-hydroxy-10-heptadecen-8-ynoic acid, [M-H]1-	Unknown	349717	337112	311757	143746	133045	72972.4	380954	480048	454772	465390	575189	531353	434219	486403	465352	130676	3396.86	121809	609178	590142	576614	784661	493276	634279	542255	586060	631259	102626	104849	101775	887735	1047741	1004011	872901	1011659	936363
met_4739	395.151	10.432	24.466	192.67	Unknown	Unknown	136689	155509	140098	78654.1	89297.1	97656.1	12860.2	12338.9	11192.5	9401.24	12016.2	14511.9	200928	174561	166492	102079	100445	97240.8	16900.8	14072.2	142498	23351.9	14703.3	15006	172799	201159	171479	79863.6	103446	106961	20648.8	25215.1	19353.6	14718.1	25509.1	25012.6
met_6571	445.216	10.432	26.408	207.37	Unknown	Unknown	136689	155509	140098	78654.1	89297.1	97656.1	6944.52	8168.19	8455.41	122429	114960	7180.86	200928	174561	166492	102079	100445	97240.8	9278.34	10764.2	8995.53	12105.7	112104	9643.14	172799	201159	171479	79863.6	103446	106961	14587.9	16959.9	17541	10091.7	19168.6	15001.1
met_1918	243.196	10.433	20.897	167.62	10-hydroxy-tetradecanoic acid, [M-H]1-; 11-hydroxy-tetradecanoic acid, [M-H]1-; 3-hydroxy-tetradecanoic acid, [M-H]1-; 5-hydroxy-tetradecanoic acid, [M-H]1-; 6-hydroxy-tetradecanoic acid, [M-H]1-; alpha-hydroxy myristic acid, [M-H]1-; omega-hydroxy myristic acid, [M-H]1-	Unknown	29515	11381.7	17176.4	27482.1	16862.5	16437	29051.3	19892.7	17368.5	34500.8	17206.4	17673.9	22581.8	9980.23	25149	44532.4	14701.8	20052.2	30603.1	13084.9	22219.9	35783.3	15757.9	35897.7	20780.3	17392.2	16258.2	21517.6	18952.7	35337.7	26924.8	19721.1	33207.7	20547.2	22133.9	22706.7
met_2254	454.165	10.433	25.946	203.57	Unknown	Unknown	24639.9	25573.9	21564	37366.7	20881.8	32120	19799.5	26046.3	25985.5	25514.8	30148	29982.1	35676.3	27834.1	26961.1	56567.1	43850	21459.9	36026.9	32194.7	35378.2	44121.7	28530.2	38863.9	40415.6	38086.2	42483.7	38125	48884.5	44716.5	47867.5	58906.4	51885.4	50167.8	52072.4	53983.5
met_7109	263.201	10.433	21.877	174.88	Norlinolenic acid, [M-H]1-; 10E-heptadecen-8-ynoic acid, [M-H]1-; 3,7,11-Trimethyl-2,6,10-dodecatrienyl acetate, [M-H]1-	Unknown	136689	155509	140098	78654.1	89297.1	97656.1	7174.76	117850	6319.19	6002.21	8957.86	8720.17	200928	174561	166492	102079	100445	97240.8	9350.27	142363	142498	11072.9	7915.68	5120.61	172799	201159	171479	79863.6	103446	106961	15776.8	15275.1	17906.9	10760.2	10961.8	16449.1
met_2925	233.154	10.434	19.47	156.35	4,6-Decadiyn-1-ol isovalerate, [M-H]1-	Unknown	31127.6	12494.7	23146.5	21546.7	17167.8	14750.3	21978	15334.4	8910.65	13533.3	14662.5	17583.1	22962.7	19031.2	17413.2	16132.6	9304.18	19527.8	26747.3	17922.3	24586.1	6968.53	19585.7	17713	20727.6	17676.7	30167.2	13325	21874.7	16453.7	34902.4	19235	14771.3	19532.2	26241.3	14258
met_1245	291.196	10.438	21.215	168.75	(-)-8-hydroxy-11E,17-octadecadien-9-ynoic acid, [M-H]1-; 12,13S-EOT, [M-H]1-; 12-oxo-PDA, [M-H]1-; 13-keto-9Z,11E,15Z-octadecatrienoic acid, [M-H]1-; 8-hydroxy-10,12-octadecadiynoic acid, [M-H]1-; 8-hydroxy-9,11-octadecadiynoic acid, [M-H]1-; 9-hydroxy-10E,14Z-octadecadien-12-ynoic acid, [M-H]1-; Colnelenic acid, [M-H]1-; Etherolenic acid, [M-H]1-; Panaquinquecol 1, [M-H]1-; alpha-licanic acid, […	Unknown	44004.6	43818	50141.8	46302.6	43421.8	49799.2	27946.7	23899.2	28319.3	19561.9	27681.1	24987.6	90409.9	81484.1	100266	39403.7	58081.1	31265.4	48343	49808.9	52400.3	56948.1	39316.7	46679.6	82481.1	81344.2	88104.2	37489.6	45983.6	40619.8	48128.9	55418.3	57696.4	42232.5	54344.9	48560.4
met_1745	373.199	10.438	24.049	189.72	(-)-8-hydroxy-11E,17-octadecadien-9-ynoic acid, [M-H+CH3COONa]1-; 12,13S-EOT, [M-H+CH3COONa]1-; 12-oxo-PDA, [M-H+CH3COONa]1-; 13-keto-9Z,11E,15Z-octadecatrienoic acid, [M-H+CH3COONa]1-; 17-oxo-Resolvin D1, [M-H]1-; 8-hydroxy-10,12-octadecadiynoic acid, [M-H+CH3COONa]1-; 8-hydroxy-9,11-octadecadiynoic acid, [M-H+CH3COONa]1-; 8-oxo-Resolvin D1, [M-H]1-; 9-hydroxy-10E,14Z-octadecadien-12-ynoic acid,…	Unknown	28833.4	33380.4	33096.1	60595.9	64702	54476.8	18880.8	18117.7	17821.1	12422.7	18645.1	17136.3	59702	52672.4	54137.7	46527.5	74434.1	80119.3	32583	33915.2	33753.7	31673.7	25479.1	31599.4	55557.6	59984.9	55122.4	93431.2	92279.4	95621.6	36831	36703.3	38914.3	25342.1	35182.3	33364
met_1161	313.18	10.452	23.03	182.8	Unknown	Unknown	51997.7	30154.4	29835.5	60772.8	33803.1	33600.1	64968.8	39516.2	32924.1	69164	31667.4	32402.1	33039.7	20733.4	45030.5	46339.6	19277.4	31430.5	30708.1	22128.7	31760.6	47810.2	31333.7	70303.2	63195.2	40738.8	36702.4	36119.9	36304.1	62177	37361.2	30075.8	61951	29032.7	32068.3	36174.9
met_6413	395.182	10.454	26.078	205.49	Unknown	Unknown	7180.42	6381.16	6793.82	11080.5	7271.34	7471.77	12181.5	7863.28	7086.99	8510.8	6792	5277.23	6379.88	5437.68	7506.41	6884.89	6088.43	6649.34	8577.43	5707.8	8391.57	6941.58	5040.53	9182.92	11443.5	6018.34	5762.55	5210	5983.67	12559.7	4458.03	4985.51	10086.8	6326.93	6458.89	6514.28
met_3035	417.224	10.461	25.139	197.7	(+/-)11,12-Ep-15S-HETrE, [M-H+CH3COONa]1-; 10,11-dihydro-12-oxo-LTB4, [M-H+CH3COONa]1-; 11,12-DiHETE, [M-H+CH3COONa]1-; 11,12-epoxy-8-hydroxyeicosa-5,9,14-trienoic acid, [M-H+CH3COONa]1-; 11-HpETE, [M-H+CH3COONa]1-; 11-deoxy-PGE2, [M-H+CH3COONa]1-; 12S-HpETE, [M-H+CH3COONa]1-; 14,15-DiHETE, [M-H+CH3COONa]1-; 14,15-Ep-11-HETrE, [M-H+CH3COONa]1-; 14,15-HxA3 (11S), [M-H+CH3COONa]1-; 14,15-HxB3 (13R)…	LT-like, [M-H+CH3COONa]1-	13626.4	11809.2	10574.5	9048.18	10636.1	9614.95	14877.6	10108.5	14173.4	8961.01	12518.5	12799.5	13185.7	13597.8	15938.7	19852.7	17388	10971.9	14561.9	12496.5	11256.6	10912.4	6430.12	11729.6	26703.2	31309.7	29604.5	12345.7	15379.4	17630.5	31430.6	36030.6	32517.7	24869.5	31190.8	30495.2
met_803	335.222	10.461	22.755	180.1	(+/-)11,12-Ep-15S-HETrE, [M-H]1-; 10,11-dihydro-12-oxo-LTB4, [M-H]1-; 11,12-DiHETE, [M-H]1-; 11,12-epoxy-8-hydroxyeicosa-5,9,14-trienoic acid, [M-H]1-; 11-HpETE, [M-H]1-; 11-deoxy-PGE2, [M-H]1-; 12S-HpETE, [M-H]1-; 14,15-DiHETE, [M-H]1-; 14,15-Ep-11-HETrE, [M-H]1-; 14,15-HxA3 (11S), [M-H]1-; 14,15-HxB3 (13R), [M-H]1-; 14,15-dihydroxy-5,8,10,12-eicosatetraenoic acid, [M-H]1-; 14-hydroperoxy-5Z,8Z,…	LT-like, [M-H]1-	56105.7	52923.6	49299.2	56987.9	33057.6	45215.4	57351.4	56601.2	49316.6	43269.3	64617.2	67066.5	61763.1	56017	60076.4	41701.2	48705.1	97240.8	65430.6	62451.9	58640	62545	43771.3	61730.9	123236	141968	136038	37063.4	103446	25031.5	159217	151040	155312	132670	153047	154509
met_1602	315.253	10.485	22.375	177.49	threo-9,10-Dihydroxystearic acid, [M-H]1-; 15,16-dihydroxy-octadecanoic acid, [M-H]1-; 9,14-dihydroxy-octadecanoic acid, [M-H]1-; 4,14-dihydroxy-octadecanoic acid, [M-H]1-; 12,13-dihydroxy stearic acid, [M-H]1-; 11,12-dihydroxy stearic acid, [M-H]1-; 9,12-dihydroxy stearic acid, [M-H]1-; 10,11-dihydroxy stearic acid, [M-H]1-; 9R,10S-dihydroxy-stearic acid, [M-H]1-; 8,9-dihydroxy stearic acid, [M-…	Unknown	33213.8	45577.9	27553.3	20044	26690.8	20084.1	31027.7	36299	23387	34141.2	28187.3	26390.4	35074	30518.9	38097.9	30365.7	23679.2	24355.9	28381.9	20905.5	24966.2	34310.7	27844.5	35812.7	17853.4	23197.2	18613.1	23592.6	10206	24808.8	25574.7	18260.3	32685	26231.8	19740.2	15787.2
met_1796	361.199	10.536	23.699	187.14	12-hydroxy-5,8,10-heptadecatrienoic acid, [M-H+CH3COONa]1-; 12S-HHTrE, [M-H+CH3COONa]1-; Dihydropanaxacol, [M-H+CH3COONa]1-; methyl (2E,6E,10R,11S)-10,11-epoxy-3,7,11-trimethyltrideca-2,6-dienoate, [M-H+CH3COONa]1-	Unknown	32464.6	22565	23388.8	20538.8	25767	31163.2	18032.7	13350.2	16207.8	14475	14319.5	17749.3	5046.13	14105.8	3689.31	8547.28	12699.5	11658.4	109333	99287.5	103691	109021	86715.4	99918.2	18877.3	21884.5	18280.8	28013.4	37962.8	37260	28435.7	38675.2	33920.5	26117	34807.9	28627.8
met_220	279.196	10.536	21.234	169.21	12-hydroxy-5,8,10-heptadecatrienoic acid, [M-H]1-; 12S-HHTrE, [M-H]1-; Dihydropanaxacol, [M-H]1-; methyl (2E,6E,10R,11S)-10,11-epoxy-3,7,11-trimethyltrideca-2,6-dienoate, [M-H]1-	Unknown	293484	265657	262710	4851.91	8350.31	7702.37	145046	153667	157212	143122	161169	160277	49831.8	39144.4	46405.9	6725.69	19416.9	11682.9	1123140	1057826	1140551	1167338	927390	1108364	7118.82	8593.69	6706.66	184387	218584	249406	333763	379462	360108	293723	335379	332777
met_3926	422.139	10.537	24.582	193.21	Unknown	Unknown	136689	155509	140098	78654.1	89297.1	97656.1	110198	11022.1	115293	9904.69	114960	114850	200928	174561	166492	102079	100445	97240.8	55358.2	30389.5	81349	32767.4	17288.8	37764.5	172799	201159	171479	79863.6	103446	106961	12566	8030.35	7926.62	25826.2	3341.37	18553.4
met_2729	450.261	10.55	25.955	203.72	Unknown	Unknown	12942.2	22936.9	14138.6	78654.1	89297.1	97656.1	110198	117850	115293	122429	114960	114850	145550	66066.6	68602.7	102079	100445	97240.8	141025	4582.71	3129.12	12955.1	112104	1727.75	22548	53934.3	23244.3	79863.6	103446	106961	2801.74	156024	144376	157032	145810	154750
met_2064	221.154	10.564	19.067	153.51	7E,9E,11-Dodecatrienyl acetate, [M-H]1-; 9Z-Dodecen-7-ynyl acetate, [M-H]1-; R-cucujolide V, [M-H]1-	Unknown	23095.3	29637.3	24027.4	32015.3	24644.5	31339.4	32516.9	28309.2	26391.8	32204.7	24708.2	21520.3	13819.2	23593	28402.1	18333.3	14851.3	33807.9	25921.3	21077.6	25761.6	22102.6	23055	30014.5	28789.1	15601.1	12096.2	21756.1	20140.5	36838.1	18278	28227.4	14470.6	35185.3	19921.2	26483.1
met_2646	417.224	10.57	25.12	197.54	(+/-)11,12-Ep-15S-HETrE, [M-H+CH3COONa]1-; 10,11-dihydro-12-oxo-LTB4, [M-H+CH3COONa]1-; 11,12-DiHETE, [M-H+CH3COONa]1-; 11,12-epoxy-8-hydroxyeicosa-5,9,14-trienoic acid, [M-H+CH3COONa]1-; 11-HpETE, [M-H+CH3COONa]1-; 11-deoxy-PGE2, [M-H+CH3COONa]1-; 12S-HpETE, [M-H+CH3COONa]1-; 14,15-DiHETE, [M-H+CH3COONa]1-; 14,15-Ep-11-HETrE, [M-H+CH3COONa]1-; 14,15-HxA3 (11S), [M-H+CH3COONa]1-; 14,15-HxB3 (13R)…	Unknown	16330.5	16220.8	13589	11184.2	6640.84	10331.2	14983.7	9989.53	13039.9	12171.3	13954.4	14402.3	20703.8	17522	16241.2	13622.2	17384.4	8784.73	15956.4	18682.1	15521.3	19304.5	13816.5	15424	31653.6	36272.3	34069.4	12750.2	9552.48	14375.2	33010.9	39709.7	35361.3	24291	37683.9	31088.7
met_604	335.222	10.571	22.92	181.42	(+/-)11,12-Ep-15S-HETrE, [M-H]1-; 10,11-dihydro-12-oxo-LTB4, [M-H]1-; 11,12-DiHETE, [M-H]1-; 11,12-epoxy-8-hydroxyeicosa-5,9,14-trienoic acid, [M-H]1-; 11-HpETE, [M-H]1-; 11-deoxy-PGE2, [M-H]1-; 12S-HpETE, [M-H]1-; 14,15-DiHETE, [M-H]1-; 14,15-Ep-11-HETrE, [M-H]1-; 14,15-HxA3 (11S), [M-H]1-; 14,15-HxB3 (13R), [M-H]1-; 14,15-dihydroxy-5,8,10,12-eicosatetraenoic acid, [M-H]1-; 14-hydroperoxy-5Z,8Z,…	LT-like, [M-H]1-	86575.6	86847.9	78104.9	60890.7	43777.9	3748.46	67409.4	65069.8	72793.2	63445.6	78330	82003.4	104008	107238	93349.4	68590	56126.3	50388.7	89732.7	90678.7	85242.4	100339	61135.7	92070.4	173097	193406	193877	86945.3	95187	75266.1	168882	212160	185577	164687	208302	202036
met_5934	317.211	10.572	22.895	181.64	11(12)-EpETE, [M-H]1-; 11-oxo-5E,8Z,12Z,14Z-Eicosatetraenoic acid, [M-H]1-; 11R-HEPE, [M-H]1-; 14(15)-EpETE, [M-H]1-; 14,15-LTA4, [M-H]1-; 15-HEPE, [M-H]1-; 15-Oxo-ETE, [M-H]1-; 15S-HEPE, [M-H]1-; 15d-PGA1, [M-H]1-; 17(18)-EpETE, [M-H]1-; 18R-HEPE, [M-H]1-; 4,5-LTA4, [M-H]1-; 5-Oxo-ETE, [M-H]1-; 5S-HEPE, [M-H]1-; 8(9)-EpETE, [M-H]1-; 8-oxo-5E,9Z,11Z,14Z-eicosatetraenoic acid, [M-H]1-; 9-hydroxy-2…	HEPE-like, [M-H]1-; oxoETE-like, [M-H]1-	4251.81	7323.6	5287.14	7373.52	6766.89	8030.98	6665.69	4292.11	8175.62	4842.53	7945.64	6674.43	10365.2	9144.16	9811.38	16851.2	7828.84	6452.41	9449.27	5977.89	3431.83	6916.83	4225.08	8703.09	13549.2	14234.4	14507.6	8313.51	10271.6	13670.5	9232.28	15850.2	12681.5	14647.9	19358.8	16217.9
met_7312	552.329	10.583	30.069	235.08	Unknown	Unknown	4285.25	8858.64	140098	78654.1	89297.1	97656.1	110198	117850	115293	122429	114960	114850	41783.8	23397.6	23840.5	102079	100445	97240.8	2796.95	142363	142498	143568	112104	140749	8058.32	14402.4	6083.74	79863.6	103446	106961	145414	156024	144376	157032	145810	154750
met_3232	233.154	10.608	19.472	156.37	4,6-Decadiyn-1-ol isovalerate, [M-H]1-	Unknown	30207.5	13224.7	12171.6	12072.5	9884.39	24485.5	11139.3	11086.6	12615.4	12134.1	16569.1	6911.54	20934.2	12282.2	12655	13907.3	13882.8	11148.4	13526.3	9892.84	8722.58	14009	22984.5	12434.9	11897.3	16062	9509.88	12206.2	12425.1	15853.1	16506.9	9871.83	7422.92	28941.8	14595	13530.7
[truncated: 1,470 more rows]
